# Supplementary material
Source: PubMed Central journal article supplement (PMC6307951)
Supplement: jci-129-123176-s185.pdf [file jci-129-123176-s185.pdf]

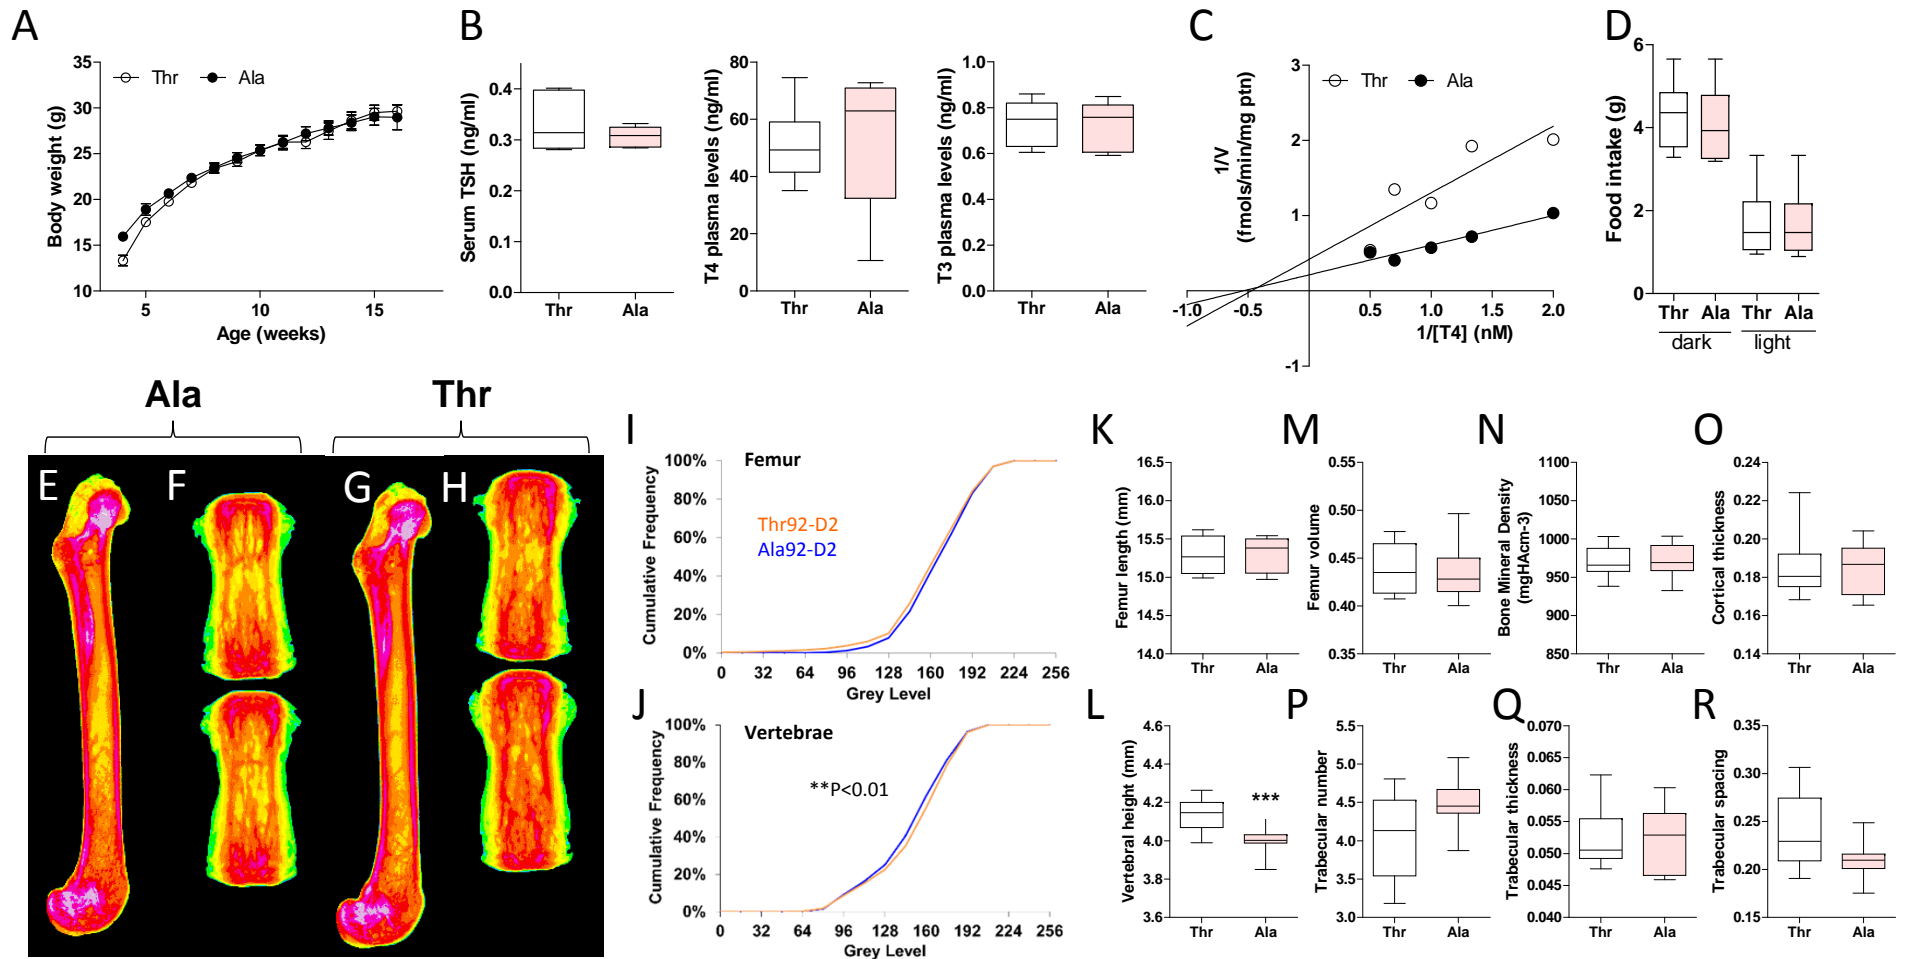

**Figure S1: Additional phenotype of the Ala92-Dio2 mouse.** (A) Ala92-Dio2 (Ala) mice exhibit normal growth curves without difference from Thr92-Dio2 mice (Thr); (B) Ala92-Dio2 mice have similar systemic thyroid hormone levels compared to Thr92-Dio2 mice; (C) Lineweaver-Burke plots of D2 activity as measured in cerebral cortex sonicates obtained from Thr92-Dio2 and Ala92-Dio2 animals; both calculated  $K_m$ (T4) are similar at ~1.9nM; (D) food intake during light and dark cycles in 24 h; (E-H) digital x-ray microradiography images of Ala92-Dio2 femurs and vertebrae show no gross differences compared to those from Thr92-Dio2 mice; (I-J) femoral bone mineral content (BMC) was similar between genotypes and slightly increased in vertebrae from Ala92-Dio2 mice; (K-L) femoral lengths and vertebral heights were also quantified and while there was no difference in length, a shorter vertebral height was observed in the Ala92-Dio2 mice; (M-V) femoral bone volume and density, cortical thickness, trabecular number, thickness and spacing, and tibial and vertebral strength and stiffness showed no differences between the genotypes; values are shown in a box and whiskers plot or mean±SEM; n=6-10/group; in (J) Kolmogorov-Smirnov test was used; \*\*  $p < 0.01$  and \*\*\* $p < 0.001$ .

## Supplemental Figure 1

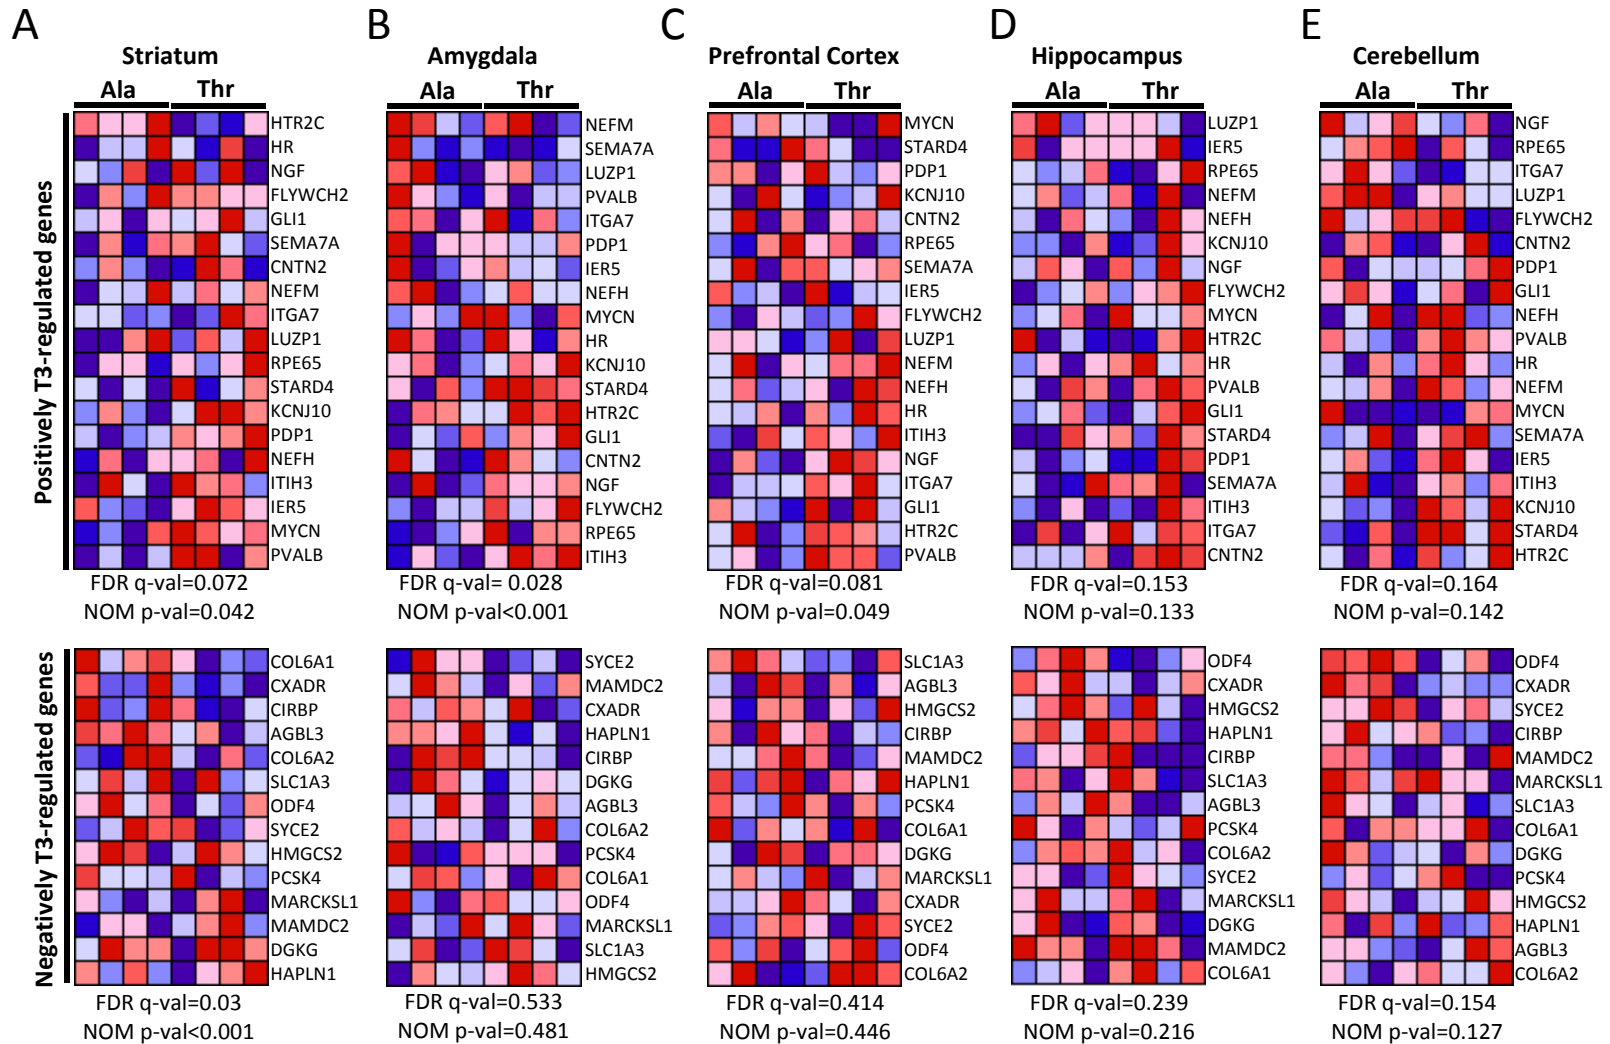

**Figure S2: Expression of positively or negatively T3-regulated genes in 5 regions of the Ala92-Dio2 and Thr92-Dio2 brain. (A) Striatum; (B) Amygdala; (C) Prefrontal Cortex; (D) Hippocampus; (E) Cerebellum; upper heat maps feature 19 genes positively regulated by T3; lower heat maps feature 14 genes negatively regulated by T3; expression values are represented as colors (red: increased expression; blue decreased expression) with the degree of color saturation indicating level of expression; False Discovery Rate (FDR) q-value and Nominal (NOM) p-value are shown for each heat map; n=4/group.**

## Open Field

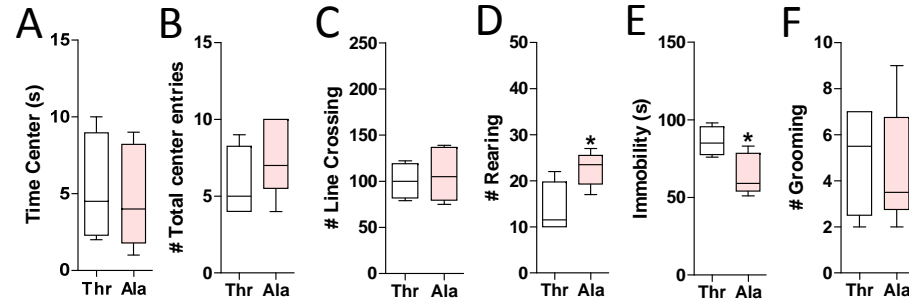

## Elevated Plus Maze

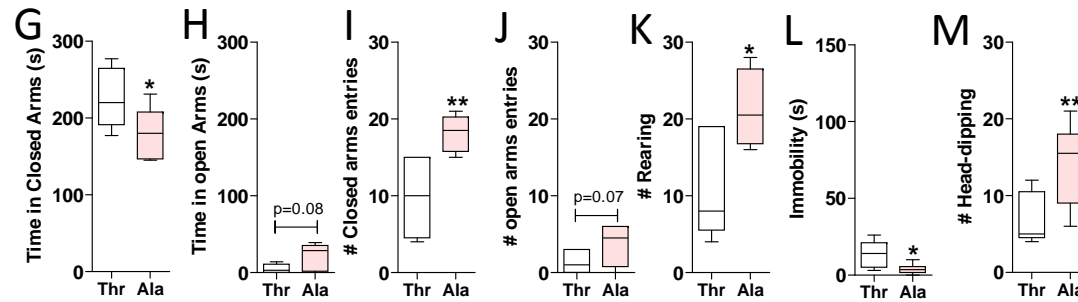

## Tail Suspension

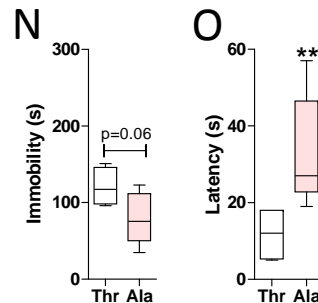

**Figure S3: Additional behavioral tests in Thr92-Dio2 (Thr) and Ala92-Dio2 (Ala) mice.** Open Field: (A) time in center; (B) total center entries; (C) total numbers of line crossing; (D) rearing; (E) immobility; (F) grooming. Elevated plus maze: (G) time spent inside closed arms or (H) open arms; (I) entries into closed arms or (J) open arms; (K) rearing; (L) immobility; (M) number of head-dips. Tail suspension test: (N) time of immobility; (O) latency to the first immobility episode; values are shown in a box and whiskers plot; n=4-6/group; Statistical analysis used was Mann-Whitney U test; \* p < 0.05 and \*\* p < 0.01.

## Novel Object Recognition (Familiarization)

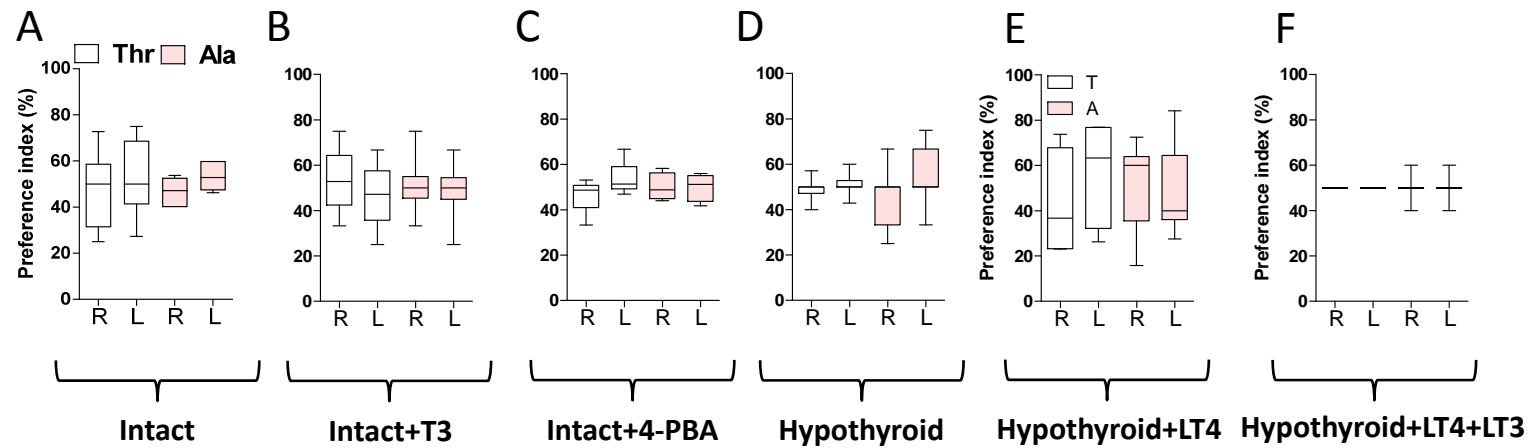

**Figure S4: Familiarization session of NOR memory test displayed as preference index (%) of Thr92-Dio2 (Thr) and Ala92-Dio2 (Ala) mice. (A) intact animals; (B) intact + LT3 animals; (C) Intact + 4-PBA animals; (D) hypothyroid animals; (E) hypothyroid+LT4 animals; (F) hypothyroid+LT4+LT3 animals; in each plot, R is the right object and L is the left object; values are shown in a box and whiskers plot indicating median and quartiles; n=5-11/group; Statistical analysis used was Mann-Whitney U test.**

## Social Interaction (Familiarization)

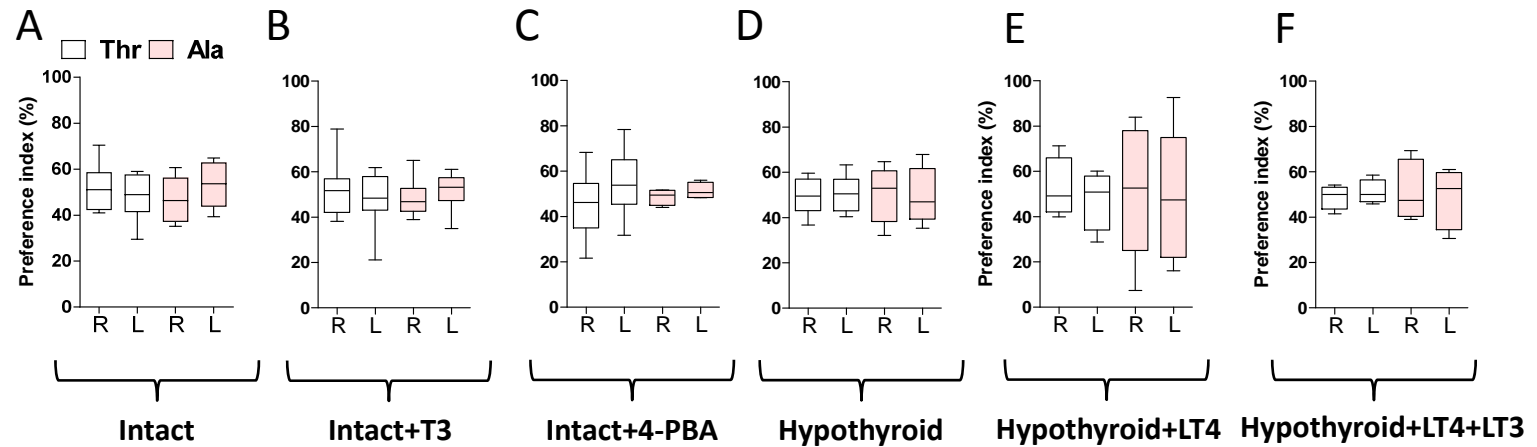

**Figure S5: Familiarization session of SI memory test displayed as preference index (%) of Thr<sub>92</sub>-Dio<sub>2</sub> (Thr) and Ala<sub>92</sub>-Dio<sub>2</sub> (Ala) mice. (A) intact animals; (B) intact + LT3 animals; (C) Intact + 4-PBA animals; (D) hypothyroid animals; (E) hypothyroid+LT4 animals; (F) hypothyroid+LT4+LT3 animals; in each plot, R is the right subject and L is the left subject; values are shown in a box and whiskers plot indicating median and quartiles; n=5-11/group; Statistical analysis used was Mann-Whitney U test.**

**Table S1-** ER stress-related genes mRNA in Thr92-D2<sup>HY</sup> and Ala92-D2<sup>HY</sup> cells treated with 100uM 4-PBA during 24h.

| <b>Genes</b>   | <b>Thr92-D2<sup>HY</sup> vs Ala92-D2<sup>HY</sup> relative mRNA levels</b> |
|----------------|----------------------------------------------------------------------------|
| <i>BIP</i>     | 1.09±0.08                                                                  |
| <i>CHOP</i>    | 1.07±0.20                                                                  |
| <i>sXBP1</i>   | 0.99±0.08                                                                  |
| <i>ERGIC53</i> | 0.70±0.03**                                                                |
| <i>ATF4</i>    | 1.08±0.08                                                                  |

Results are relative to *bACTIN* mRNA levels and normalized to Thr92-D2<sup>HY</sup>; \*\*p≤ 0.01 vs. Thr92-D2<sup>HY</sup>-4PBA cells. values are the mean ± SEM of 4-6 independent samples; gene abbreviations are as indicated in the supplemental Tables S27.

**Table S2- Genes upregulated in the Amygdala of Ala92-Dio2 mice. (p<0.05)**

| <b>Gene Symbol</b> | <b>Description</b>                                                                                      | <b>Fold Change (linear) (AA Amg vs. TT Amg)</b> | <b>ANOVA p-value (AA Amg vs. TT Amg)</b> | <b>FDR p-value (AA Amg vs. TT Amg)</b> |
|--------------------|---------------------------------------------------------------------------------------------------------|-------------------------------------------------|------------------------------------------|----------------------------------------|
| <i>Pcbp2</i>       | poly(rC) binding protein 2                                                                              | 1.09                                            | 0.040042                                 | 0.955604                               |
| <i>Pgrmc2</i>      | progesterone receptor membrane component 2                                                              | 1.09                                            | 0.024062                                 | 0.934625                               |
| <i>Ppp4c</i>       | protein phosphatase 4, catalytic subunit                                                                | 1.1                                             | 0.048309                                 | 0.955604                               |
| <i>Adrm1</i>       | adhesion regulating molecule 1                                                                          | 1.1                                             | 0.049191                                 | 0.955604                               |
| <i>Fam73a</i>      | family with sequence similarity 73, member A                                                            | 1.1                                             | 0.030434                                 | 0.955027                               |
| <i>Plppr4</i>      | phospholipid phosphatase related 4                                                                      | 1.11                                            | 0.041731                                 | 0.955604                               |
| <i>Akt1s1</i>      | AKT1 substrate 1 (proline-rich); microRNA 707                                                           | 1.11                                            | 0.04563                                  | 0.955604                               |
| <i>Lrp12</i>       | low density lipoprotein-related protein 12                                                              | 1.12                                            | 0.022065                                 | 0.934625                               |
| <i>Slc25a17</i>    | solute carrier family 25 (mitochondrial carrier, peroxisomal membrane protein), member 17               | 1.12                                            | 0.004946                                 | 0.795858                               |
| <i>Myo19</i>       | myosin XIX                                                                                              | 1.12                                            | 0.02528                                  | 0.939355                               |
| <i>Olf1406</i>     | olfactory receptor 1406                                                                                 | 1.13                                            | 0.043776                                 | 0.955604                               |
| <i>Ppp2r5a</i>     | protein phosphatase 2, regulatory subunit B, alpha; protein phosphatase 2, regulatory subunit B', alpha | 1.14                                            | 0.004982                                 | 0.795858                               |
| <i>Yy1</i>         | YY1 transcription factor                                                                                | 1.14                                            | 0.022014                                 | 0.934625                               |
| <i>Spcs2</i>       | signal peptidase complex subunit 2 homolog (S. cerevisiae)                                              | 1.14                                            | 0.045703                                 | 0.955604                               |
| <i>Sgip1</i>       | SH3-domain GRB2-like (endophilin) interacting protein 1                                                 | 1.14                                            | 0.035641                                 | 0.955604                               |
| <i>Layn</i>        | layilin                                                                                                 | 1.14                                            | 0.018186                                 | 0.934625                               |
| <i>Aak1</i>        | AP2 associated kinase 1                                                                                 | 1.14                                            | 0.049853                                 | 0.955604                               |
| <i>Mlxip</i>       | MLX interacting protein                                                                                 | 1.14                                            | 0.023216                                 | 0.934625                               |
| <i>Atp6v1a</i>     | ATPase, H <sup>+</sup> transporting, lysosomal V1 subunit A                                             | 1.14                                            | 0.047044                                 | 0.955604                               |
| <i>Mroh9</i>       | maestro heat-like repeat family member 9                                                                | 1.15                                            | 0.021704                                 | 0.934625                               |
| <i>Morc2b</i>      | microrchidia 2B                                                                                         | 1.16                                            | 0.026019                                 | 0.944116                               |
| <i>Ift27</i>       | intraflagellar transport 27                                                                             | 1.16                                            | 0.043922                                 | 0.955604                               |
| <i>Sh3tc2</i>      | SH3 domain and tetratricopeptide repeats 2                                                              | 1.16                                            | 0.037613                                 | 0.955604                               |
| <i>Gas7</i>        | growth arrest specific 7                                                                                | 1.16                                            | 0.031351                                 | 0.955027                               |

|                  |                                                                                                                                                                                                                                                                                                                                                                                                                                                |      |          |          |
|------------------|------------------------------------------------------------------------------------------------------------------------------------------------------------------------------------------------------------------------------------------------------------------------------------------------------------------------------------------------------------------------------------------------------------------------------------------------|------|----------|----------|
|                  | UDP glucuronosyltransferase 1 family, polypeptide A2; UDP glucuronosyltransferase 1 family, polypeptide A6A; UDP glucuronosyltransferase 1 family, polypeptide A6B; UDP glycosyltransferase 1 family, polypeptide A10; UDP glucuronosyltransferase 1 family, polypeptide A7C; UDP glucuronosyltransferase 1 family, polypeptide A5; UDP glucuronosyltransferase 1 family, polypeptide A9; UDP glucuronosyltransferase 1 family, polypeptide A1 | 1.16 | 0.030432 | 0.955027 |
| <i>Ugt1a2</i>    | eukaryotic translation initiation factor 3, subunit H                                                                                                                                                                                                                                                                                                                                                                                          | 1.16 | 0.03426  | 0.955604 |
| <i>Eif3h</i>     | malate dehydrogenase 1, NAD (soluble)                                                                                                                                                                                                                                                                                                                                                                                                          | 1.16 | 0.02173  | 0.934625 |
| <i>Mdh1</i>      | MAU2 chromatid cohesion factor homolog (C. elegans)                                                                                                                                                                                                                                                                                                                                                                                            | 1.16 | 0.022027 | 0.934625 |
| <i>Mau2</i>      | glycine receptor, beta subunit                                                                                                                                                                                                                                                                                                                                                                                                                 | 1.16 | 0.049961 | 0.955604 |
| <i>Glrb</i>      | solute carrier family 27 (fatty acid transporter), member 4                                                                                                                                                                                                                                                                                                                                                                                    | 1.16 | 0.025196 | 0.939355 |
| <i>Slc27a4</i>   | cornulin                                                                                                                                                                                                                                                                                                                                                                                                                                       | 1.16 | 0.008034 | 0.844445 |
| <i>Crnn</i>      | capping protein (actin filament) muscle Z-line, alpha 2                                                                                                                                                                                                                                                                                                                                                                                        | 1.16 | 0.027456 | 0.944116 |
| <i>Capza2</i>    | Myb/SANT-like DNA-binding domain containing 4 with coiled-coils                                                                                                                                                                                                                                                                                                                                                                                | 1.16 | 0.023594 | 0.934625 |
| <i>Msantd4</i>   | Dmx-like 2                                                                                                                                                                                                                                                                                                                                                                                                                                     | 1.16 | 0.046461 | 0.955604 |
| <i>Dmxl2</i>     | ATPase, H <sup>+</sup> transporting, lysosomal accessory protein 2                                                                                                                                                                                                                                                                                                                                                                             | 1.16 | 0.041437 | 0.955604 |
| <i>Atp6ap2</i>   | CD47 antigen (Rh-related antigen, integrin-associated signal transducer)                                                                                                                                                                                                                                                                                                                                                                       | 1.17 | 0.036032 | 0.955604 |
| <i>Cd47</i>      | D-dopachrome tautomerase                                                                                                                                                                                                                                                                                                                                                                                                                       | 1.17 | 0.028624 | 0.9504   |
| <i>Ddt</i>       | ubiquitin specific peptidase 1                                                                                                                                                                                                                                                                                                                                                                                                                 | 1.17 | 0.002995 | 0.693971 |
| <i>Usp1</i>      | intraflagellar transport 57                                                                                                                                                                                                                                                                                                                                                                                                                    | 1.17 | 0.041132 | 0.955604 |
| <i>lft57</i>     | integrin alpha FG-GAP repeat containing 1                                                                                                                                                                                                                                                                                                                                                                                                      | 1.17 | 0.021576 | 0.934625 |
| <i>Itfg1</i>     | heat shock protein 14                                                                                                                                                                                                                                                                                                                                                                                                                          | 1.17 | 0.049523 | 0.955604 |
| <i>Hspa14</i>    | tumor necrosis factor receptor superfamily, member 11a, NFKB activator                                                                                                                                                                                                                                                                                                                                                                         | 1.17 | 0.018224 | 0.934625 |
| <i>Tnfrsf11a</i> | peptidyl-prolyl isomerase G (cyclophilin G)                                                                                                                                                                                                                                                                                                                                                                                                    | 1.17 | 0.045689 | 0.955604 |
| <i>Ppig</i>      | ubiquitin specific peptidase 7                                                                                                                                                                                                                                                                                                                                                                                                                 | 1.17 | 0.045661 | 0.955604 |
| <i>Usp7</i>      | transcriptional adaptor 2A                                                                                                                                                                                                                                                                                                                                                                                                                     | 1.17 | 0.019412 | 0.934625 |
| <i>Tada2a</i>    | protocadherin beta 17                                                                                                                                                                                                                                                                                                                                                                                                                          | 1.18 | 0.002648 | 0.690171 |
| <i>Pcdhb17</i>   | Shwachman-Bodian-Diamond                                                                                                                                                                                                                                                                                                                                                                                                                       | 1.18 | 0.005722 | 0.801647 |
| <i>Sbds</i>      |                                                                                                                                                                                                                                                                                                                                                                                                                                                |      |          |          |



|                 |                                                                                               |      |          |          |
|-----------------|-----------------------------------------------------------------------------------------------|------|----------|----------|
|                 | syndrome homolog (human)                                                                      |      |          |          |
| <i>Olf1419</i>  | olfactory receptor 1419                                                                       | 1.18 | 0.033638 | 0.955604 |
| <i>Actr2</i>    | ARP2 actin-related protein 2                                                                  | 1.18 | 0.033244 | 0.955027 |
| <i>Pou2af1</i>  | POU domain, class 2, associating factor 1                                                     | 1.18 | 0.00941  | 0.858114 |
| <i>Frrs1l</i>   | ferric-chelate reductase 1 like                                                               | 1.18 | 0.025412 | 0.939355 |
| <i>Arf1</i>     | ADP-ribosylation factor 1                                                                     | 1.18 | 0.005616 | 0.801647 |
| <i>Gfra4</i>    | glial cell line derived neurotrophic factor family receptor alpha 4;                          |      |          |          |
| <i>Mlx</i>      | microRNA 6973b                                                                                | 1.18 | 0.038013 | 0.955604 |
| <i>Grina</i>    | MAX-like protein X                                                                            | 1.18 | 0.024848 | 0.93844  |
| <i>Picalm</i>   | glutamate receptor, ionotropic, N-methyl D-aspartate-associated protein 1 (glutamate binding) | 1.19 | 0.00943  | 0.858114 |
| <i>Pdcl3</i>    | phosphatidylinositol binding clathrin assembly protein                                        | 1.19 | 0.02597  | 0.944116 |
| <i>Skint9</i>   | phosducin-like 3                                                                              | 1.19 | 0.032076 | 0.955027 |
| <i>Zfyve9</i>   | selection and upkeep of intraepithelial T cells 9                                             | 1.19 | 0.040837 | 0.955604 |
| <i>Setd2</i>    | zinc finger, FYVE domain containing 9                                                         | 1.19 | 0.030374 | 0.955027 |
| <i>Blzf1</i>    | SET domain containing 2                                                                       | 1.19 | 0.02135  | 0.934625 |
| <i>Dhrs1</i>    | basic leucine zipper nuclear factor 1 dehydrogenase/reductase (SDR family) member 1           | 1.19 | 0.040471 | 0.955604 |
| <i>Tmem239</i>  | transmembrane 239                                                                             | 1.19 | 0.049583 | 0.955604 |
| <i>Actr3</i>    | ARP3 actin-related protein 3                                                                  | 1.19 | 0.038033 | 0.955604 |
| <i>Spin2f</i>   | spindlin family, member 2F [Source:MGI Symbol;Acc:MGI:3780958]; spindlin family, member 2F    | 1.19 | 0.013027 | 0.915448 |
| <i>Ikbkb</i>    | inhibitor of kappaB kinase beta                                                               | 1.19 | 0.032213 | 0.955027 |
| <i>Pdhx</i>     | pyruvate dehydrogenase complex, component X                                                   | 1.19 | 0.016316 | 0.934625 |
| <i>Rab6a</i>    | RAB6A, member RAS oncogene family                                                             | 1.19 | 0.018882 | 0.934625 |
| <i>Kras</i>     | v-Ki-ras2 Kirsten rat sarcoma viral oncogene homolog                                          | 1.19 | 0.000598 | 0.577367 |
| <i>St3gal1</i>  | ST3 beta-galactoside alpha-2,3-sialyltransferase 1                                            | 1.19 | 0.047468 | 0.955604 |
| <i>Usp54</i>    | ubiquitin specific peptidase 54                                                               | 1.2  | 0.00163  | 0.661654 |
| <i>Rfwd3</i>    | ring finger and WD repeat domain 3                                                            | 1.2  | 0.042528 | 0.955604 |
| <i>Cpn1</i>     | carboxypeptidase N, polypeptide 1                                                             | 1.2  | 0.025356 | 0.939355 |
| <i>Gvin1</i>    | GTPase, very large interferon inducible 1                                                     | 1.2  | 0.049334 | 0.955604 |
| <i>Fpgt</i>     | fuco-1-phosphate                                                                              | 1.2  | 0.033039 | 0.955027 |
| <i>Pcyox1l</i>  | guanylyltransferase                                                                           | 1.2  | 0.043561 | 0.955604 |
| <i>Mesp2</i>    | prenylcysteine oxidase 1 like                                                                 | 1.2  | 0.004908 | 0.795519 |
| <i>Golga2</i>   | mesoderm posterior 2                                                                          | 1.2  | 0.029707 | 0.955027 |
| <i>Cdc34-ps</i> | golgi autoantigen, golgin subfamily a, 2                                                      | 1.2  | 0.001791 | 0.661654 |
|                 | cell division cycle 34 homolog,                                                               | 1.2  | 0.007006 | 0.828491 |

|                  |                                                                                                 |      |          |          |
|------------------|-------------------------------------------------------------------------------------------------|------|----------|----------|
|                  | pseudogene ( <i>S. cerevisiae</i> )                                                             |      |          |          |
| <i>Actrt1</i>    | actin-related protein T1                                                                        | 1.2  | 0.014917 | 0.934625 |
| <i>Yipf2</i>     | Yip1 domain family, member 2                                                                    | 1.2  | 0.047651 | 0.955604 |
| <i>Mphosph10</i> | M-phase phosphoprotein 10 (U3 small nucleolar ribonucleoprotein)                                | 1.2  | 0.024892 | 0.93844  |
| <i>Snx10</i>     | sorting nexin 10                                                                                | 1.2  | 0.035305 | 0.955604 |
| <i>Sprn</i>      | shadow of prion protein REX2, RNA exonuclease 2 homolog ( <i>S. cerevisiae</i> )                | 1.2  | 0.028633 | 0.9504   |
| <i>Rexo2</i>     |                                                                                                 | 1.21 | 0.018239 | 0.934625 |
| <i>Chid1</i>     | chitinase domain containing 1 BRO1 domain and CAAX motif                                        | 1.21 | 0.038805 | 0.955604 |
| <i>Brox</i>      | containing                                                                                      | 1.21 | 0.022966 | 0.934625 |
| <i>Adprh1</i>    | ADP-ribosylhydrolase like 1                                                                     | 1.21 | 0.047535 | 0.955604 |
| <i>Zfp316</i>    | zinc finger protein 316                                                                         | 1.21 | 0.0269   | 0.944116 |
| <i>Scmh1</i>     | sex comb on midleg homolog 1 5-hydroxytryptamine (serotonin) receptor 6                         | 1.22 | 0.037646 | 0.955604 |
| <i>Htr6</i>      |                                                                                                 | 1.22 | 0.022049 | 0.934625 |
| <i>Pcmt1</i>     | protein-L-isoaspartate (D-aspartate) O-methyltransferase domain containing 1                    | 1.22 | 0.025909 | 0.944116 |
| <i>Arx</i>       | aristaless related homeobox                                                                     | 1.22 | 0.015539 | 0.934625 |
| <i>Adat2</i>     | adenosine deaminase, tRNA-specific 2                                                            | 1.22 | 0.002853 | 0.693971 |
| <i>Retnlb</i>    | resistin like beta                                                                              | 1.22 | 0.033134 | 0.955027 |
| <i>Ms4a4b</i>    | membrane-spanning 4-domains, subfamily A, member 4B ELKS/RAB6-interacting/CAST family member 2  | 1.22 | 0.040883 | 0.955604 |
| <i>Erc2</i>      |                                                                                                 | 1.22 | 0.046663 | 0.955604 |
| <i>Hspbap1</i>   | Hspb associated protein 1                                                                       | 1.22 | 0.034453 | 0.955604 |
| <i>Trim28</i>    | tripartite motif-containing 28                                                                  | 1.22 | 0.005728 | 0.801647 |
| <i>Egfl7</i>     | EGF-like domain 7; microRNA 126a                                                                | 1.22 | 0.033274 | 0.955027 |
| <i>Olf2r283</i>  | olfactory receptor 283                                                                          | 1.22 | 0.015603 | 0.934625 |
| <i>Hk1</i>       | hexokinase 1                                                                                    | 1.22 | 0.020441 | 0.934625 |
| <i>Nrcam</i>     | neuronal cell adhesion molecule discs, large ( <i>Drosophila</i> ) homolog-associated protein 1 | 1.22 | 0.026783 | 0.944116 |
| <i>Dlgap1</i>    |                                                                                                 | 1.22 | 0.041662 | 0.955604 |
| <i>Mcm7</i>      | minichromosome maintenance deficient 7 ( <i>S. cerevisiae</i> ); microRNA 93; microRNA 25       | 1.23 | 0.004309 | 0.771675 |
| <i>Eif2b2</i>    | eukaryotic translation initiation factor 2B, subunit 2 beta                                     | 1.23 | 0.014199 | 0.934625 |
| <i>Mrpl37</i>    | mitochondrial ribosomal protein L37                                                             | 1.23 | 0.049917 | 0.955604 |
| <i>Mrpl47</i>    | mitochondrial ribosomal protein L47                                                             | 1.23 | 0.00203  | 0.661654 |
| <i>Nus1</i>      | nuclear undecaprenyl pyrophosphate synthase 1 homolog ( <i>S. cerevisiae</i> )                  | 1.23 | 0.008732 | 0.858114 |
| <i>Hagh</i>      | hydroxyacyl glutathione hydrolase terminal uridylyl transferase 1, U6                           | 1.23 | 0.024111 | 0.934625 |
| <i>Tut1</i>      | snRNA-specific                                                                                  | 1.23 | 0.007244 | 0.828491 |
| <i>Gja4</i>      | gap junction protein, alpha 4                                                                   | 1.23 | 0.019931 | 0.934625 |

|                 |                                                                                           |      |          |          |
|-----------------|-------------------------------------------------------------------------------------------|------|----------|----------|
|                 | serine-rich, secreted, X-linked<br>[Source:MGI<br>Symbol;Acc:MGI:3777603]; serine-rich,   |      |          |          |
| <i>Srsx</i>     | secreted, X-linked                                                                        | 1.23 | 0.048811 | 0.955604 |
| <i>Barx1</i>    | BarH-like homeobox 1                                                                      | 1.23 | 0.042726 | 0.955604 |
| <i>Agtpbp1</i>  | ATP/GTP binding protein 1; RIKEN<br>cDNA A230056J06 gene                                  | 1.23 | 0.022878 | 0.934625 |
| <i>Cnksr2</i>   | connector enhancer of kinase<br>suppressor of Ras 2                                       | 1.23 | 0.034775 | 0.955604 |
| <i>Dyrk3</i>    | dual-specificity tyrosine-(Y)-<br>phosphorylation regulated kinase 3                      | 1.23 | 0.024236 | 0.934625 |
| <i>Acot13</i>   | acyl-CoA thioesterase 13                                                                  | 1.23 | 0.003678 | 0.724181 |
| <i>Arhgef11</i> | Rho guanine nucleotide exchange<br>factor (GEF) 11                                        | 1.23 | 0.035184 | 0.955604 |
| <i>Kcnma1</i>   | potassium large conductance calcium-<br>activated channel, subfamily M, alpha<br>member 1 | 1.23 | 0.02727  | 0.944116 |
| <i>Cyp1a2</i>   | cytochrome P450, family 1, subfamily<br>a, polypeptide 2                                  | 1.24 | 0.007797 | 0.835337 |
| <i>Eif2b1</i>   | eukaryotic translation initiation factor<br>2B, subunit 1 (alpha)                         | 1.24 | 0.035857 | 0.955604 |
| <i>Lypla2</i>   | lysophospholipase 2                                                                       | 1.24 | 0.030494 | 0.955027 |
| <i>Pm20d1</i>   | peptidase M20 domain containing 1                                                         | 1.24 | 0.04326  | 0.955604 |
| <i>Agbl1</i>    | ATP/GTP binding protein-like 1                                                            | 1.24 | 0.029934 | 0.955027 |
| <i>Tceb1</i>    | transcription elongation factor B (SIII),<br>polypeptide 1                                | 1.24 | 0.000859 | 0.608562 |
| <i>Ddn</i>      | dendrin                                                                                   | 1.24 | 0.049623 | 0.955604 |
| <i>Cant1</i>    | calcium activated nucleotidase 1                                                          | 1.24 | 0.027216 | 0.944116 |
| <i>Tbk1</i>     | TANK-binding kinase 1                                                                     | 1.24 | 0.032111 | 0.955027 |
| <i>Uhrf1bp1</i> | UHRF1 (ICBP90) binding protein 1                                                          | 1.24 | 0.022617 | 0.934625 |
| <i>lyd</i>      | iodotyrosine deiodinase                                                                   | 1.24 | 0.032506 | 0.955027 |
| <i>Tbl1xr1</i>  | transducin (beta)-like 1X-linked<br>receptor 1                                            | 1.24 | 0.014166 | 0.934625 |
| <i>Adam25</i>   | a disintegrin and metallopeptidase<br>domain 25 (testase 2)                               | 1.24 | 0.03367  | 0.955604 |
| <i>Slc7a8</i>   | solute carrier family 7 (cationic amino<br>acid transporter, y+ system), member 8         | 1.24 | 0.02511  | 0.939355 |
| <i>Cemip</i>    | cell migration inducing protein,<br>hyaluronan binding                                    | 1.24 | 0.041586 | 0.955604 |
| <i>Ppp5c</i>    | protein phosphatase 5, catalytic<br>subunit                                               | 1.24 | 0.029758 | 0.955027 |
| <i>Coro1b</i>   | coronin, actin binding protein 1B                                                         | 1.25 | 0.026218 | 0.944116 |
| <i>G2e3</i>     | G2/M-phase specific E3 ubiquitin ligase                                                   | 1.25 | 0.039889 | 0.955604 |
| <i>Metrn</i>    | meteorin, glial cell differentiation<br>regulator                                         | 1.25 | 0.026137 | 0.944116 |
| <i>Foxg1</i>    | forkhead box G1                                                                           | 1.25 | 0.002141 | 0.661654 |
| <i>Lonp2</i>    | lon peptidase 2, peroxisomal                                                              | 1.25 | 0.001733 | 0.661654 |
| <i>Tbc1d14</i>  | TBC1 domain family, member 14                                                             | 1.25 | 0.005791 | 0.801647 |
| <i>Gpatch2l</i> | G patch domain containing 2 like                                                          | 1.25 | 0.006495 | 0.801647 |

|                  |                                           |      |          |          |
|------------------|-------------------------------------------|------|----------|----------|
| <i>Nup43</i>     | nucleoporin 43                            | 1.25 | 0.006498 | 0.801647 |
|                  | NFU1 iron-sulfur cluster scaffold         |      |          |          |
| <i>Nfu1</i>      | homolog ( <i>S. cerevisiae</i> )          | 1.25 | 0.007337 | 0.828491 |
|                  | PET117 homolog ( <i>S. cerevisiae</i> );  |      |          |          |
|                  | cysteine and glycine-rich protein 2       |      |          |          |
| <i>Pet117</i>    | binding protein                           | 1.25 | 0.045473 | 0.955604 |
| <i>Maml3</i>     | mastermind like 3 ( <i>Drosophila</i> )   | 1.25 | 0.024109 | 0.934625 |
| <i>Wars</i>      | tryptophanyl-tRNA synthetase              | 1.25 | 0.031511 | 0.955027 |
| <i>Efna2</i>     | ephrin A2                                 | 1.25 | 0.046843 | 0.955604 |
| <i>Recq15</i>    | RecQ protein-like 5                       | 1.25 | 0.044188 | 0.955604 |
|                  | TAM41, mitochondrial translocator         |      |          |          |
|                  | assembly and maintenance protein,         |      |          |          |
| <i>Tamm41</i>    | homolog ( <i>S. cerevisiae</i> )          | 1.25 | 0.037893 | 0.955604 |
| <i>Ahnak2</i>    | AHNAK nucleoprotein 2                     | 1.25 | 0.000987 | 0.626436 |
| <i>Stard7</i>    | START domain containing 7                 | 1.25 | 0.049908 | 0.955604 |
|                  | inositol polyphosphate-5-phosphatase      |      |          |          |
| <i>Inpp5b</i>    | B; microRNA 698                           | 1.25 | 0.038483 | 0.955604 |
|                  | phosphatidylglycerophosphate              |      |          |          |
| <i>Pgs1</i>      | synthase 1                                | 1.25 | 0.020071 | 0.934625 |
| <i>Tcf4</i>      | transcription factor 4                    | 1.25 | 0.047627 | 0.955604 |
|                  | family with sequence similarity 189,      |      |          |          |
| <i>Fam189a1</i>  | member A1                                 | 1.25 | 0.039983 | 0.955604 |
|                  | cellular repressor of E1A-stimulated      |      |          |          |
| <i>Creg2</i>     | genes 2                                   | 1.25 | 0.039376 | 0.955604 |
|                  | Rab geranylgeranyl transferase, a         |      |          |          |
| <i>Rabggta</i>   | subunit                                   | 1.26 | 0.033195 | 0.955027 |
|                  | zinc finger and SCAN domain               |      |          |          |
| <i>Zscan25</i>   | containing 25                             | 1.26 | 0.035892 | 0.955604 |
|                  | RNA 2,3-cyclic phosphate and 5-OH         |      |          |          |
|                  | ligase; RNA 2',3'-cyclic phosphate and    |      |          |          |
| <i>Rtcb</i>      | 5'-OH ligase                              | 1.26 | 0.045338 | 0.955604 |
|                  | serine (or cysteine) peptidase inhibitor, |      |          |          |
|                  | clade A (alpha-1 antiproteinase,          |      |          |          |
| <i>Serpina16</i> | antitrypsin), member 16                   | 1.26 | 0.004237 | 0.770544 |
| <i>Olfr484</i>   | olfactory receptor 484                    | 1.26 | 0.023947 | 0.934625 |
| <i>Ipo5</i>      | importin 5                                | 1.26 | 0.010197 | 0.872249 |
|                  | C-type lectin domain family 11,           |      |          |          |
| <i>Clec11a</i>   | member a                                  | 1.26 | 0.040989 | 0.955604 |
| <i>Nell2</i>     | NEL-like 2                                | 1.26 | 0.04646  | 0.955604 |
|                  | solute carrier family 25 (mitochondrial   |      |          |          |
|                  | carrier, adenine nucleotide               |      |          |          |
| <i>Slc25a5</i>   | translocator), member 5                   | 1.27 | 0.041885 | 0.955604 |
| <i>Gpm6b</i>     | glycoprotein m6b                          | 1.27 | 0.016288 | 0.934625 |
| <i>Ift80</i>     | intraflagellar transport 80               | 1.27 | 0.026773 | 0.944116 |
| <i>Fbxl4</i>     | F-box and leucine-rich repeat protein 4   | 1.27 | 0.002495 | 0.690171 |
| <i>Ifngr1</i>    | interferon gamma receptor 1               | 1.27 | 0.006001 | 0.801647 |
| <i>Olfr611</i>   | olfactory receptor 611                    | 1.27 | 0.001804 | 0.661654 |
| <i>Cyth4</i>     | cytohesin 4                               | 1.27 | 0.013763 | 0.925423 |
| <i>Gng12</i>     | guanine nucleotide binding protein (G     | 1.27 | 0.009298 | 0.858114 |

|                 |                                                                 |      |          |          |
|-----------------|-----------------------------------------------------------------|------|----------|----------|
|                 | protein), gamma 12                                              |      |          |          |
| <i>Tmem150a</i> | transmembrane protein 150A                                      | 1.27 | 0.009131 | 0.858114 |
| <i>Hoxb6</i>    | homeobox B6                                                     | 1.27 | 0.032953 | 0.955027 |
| <i>Ift172</i>   | intraflagellar transport 172                                    | 1.27 | 0.029373 | 0.955027 |
| <i>Ppil3</i>    | peptidylprolyl isomerase (cyclophilin)-like 3                   | 1.27 | 0.02738  | 0.944116 |
| <i>Mlycd</i>    | malonyl-CoA decarboxylase                                       | 1.27 | 0.043658 | 0.955604 |
| <i>Dydc1</i>    | DPY30 domain containing 1                                       | 1.27 | 0.010414 | 0.872249 |
| <i>Rnf115</i>   | ring finger protein 115                                         | 1.27 | 0.001632 | 0.661654 |
| <i>Megf9</i>    | multiple EGF-like-domains 9                                     | 1.27 | 0.010367 | 0.872249 |
| <i>Col4a3</i>   | collagen, type IV, alpha 3                                      | 1.28 | 0.046076 | 0.955604 |
| <i>Dnm3os</i>   | dynamin 3, opposite strand; microRNA 214; microRNA 199a-2       | 1.28 | 0.046312 | 0.955604 |
| <i>Rwdd4a</i>   | RWD domain containing 4A                                        | 1.28 | 0.031289 | 0.955027 |
| <i>Myct1</i>    | myc target 1                                                    | 1.28 | 0.007482 | 0.828491 |
| <i>Letmd1</i>   | LETM1 domain containing 1                                       | 1.28 | 0.021014 | 0.934625 |
| <i>Lpcat2b</i>  | lysophosphatidylcholine acyltransferase 2B                      | 1.28 | 0.034571 | 0.955604 |
| <i>Enkd1</i>    | enkurin domain containing 1                                     | 1.28 | 0.040227 | 0.955604 |
| <i>Olfr350</i>  | olfactory receptor 350                                          | 1.28 | 0.043286 | 0.955604 |
| <i>Acsm4</i>    | acyl-CoA synthetase medium-chain family member 4                | 1.28 | 0.024523 | 0.934625 |
| <i>Dclre1a</i>  | DNA cross-link repair 1A, PSO2 homolog ( <i>S. cerevisiae</i> ) | 1.28 | 0.017033 | 0.934625 |
| <i>Gpr84</i>    | G protein-coupled receptor 84                                   | 1.28 | 0.018437 | 0.934625 |
| <i>Cwf19l1</i>  | CWF19-like 1, cell cycle control ( <i>S. pombe</i> )            | 1.28 | 0.022402 | 0.934625 |
| <i>Mtag2</i>    | metastasis associated gene 2                                    | 1.28 | 0.006032 | 0.801647 |
| <i>Rap1b</i>    | RAS related protein 1b                                          | 1.28 | 0.019302 | 0.934625 |
| <i>Haus1</i>    | HAUS augmin-like complex, subunit 1                             | 1.28 | 0.045039 | 0.955604 |
| <i>Man1b1</i>   | mannosidase, alpha, class 1B, member 1                          | 1.28 | 0.027168 | 0.944116 |
| <i>Stambpl1</i> | STAM binding protein like 1                                     | 1.28 | 0.039643 | 0.955604 |
| <i>Dock1</i>    | dedicator of cytokinesis 1                                      | 1.29 | 0.043201 | 0.955604 |
| <i>Eno4</i>     | enolase 4                                                       | 1.29 | 0.040301 | 0.955604 |
| <i>Atl3</i>     | atlastin GTPase 3                                               | 1.29 | 0.033032 | 0.955027 |
| <i>Nckap1</i>   | NCK-associated protein 1                                        | 1.29 | 0.001597 | 0.661654 |
| <i>Pank4</i>    | pantothenate kinase 4                                           | 1.29 | 0.000763 | 0.608562 |
| <i>Arl15</i>    | ADP-ribosylation factor-like 15                                 | 1.29 | 0.034065 | 0.955604 |
| <i>Chmp5</i>    | charged multivesicular body protein 5                           | 1.29 | 0.001154 | 0.661654 |
| <i>Sval2</i>    | seminal vesicle antigen-like 2                                  | 1.29 | 0.043262 | 0.955604 |
| <i>Dnaja3</i>   | DnaJ (Hsp40) homolog, subfamily A, member 3                     | 1.29 | 0.037439 | 0.955604 |
| <i>Slc26a1</i>  | solute carrier family 26 (sulfate transporter), member 1        | 1.29 | 0.042614 | 0.955604 |
| <i>Fn3krp</i>   | fructosamine 3 kinase related protein                           | 1.29 | 0.046353 | 0.955604 |
| <i>Olfr955</i>  | olfactory receptor 955                                          | 1.29 | 0.044246 | 0.955604 |

|                 |                                                                                              |      |          |          |
|-----------------|----------------------------------------------------------------------------------------------|------|----------|----------|
|                 | hydroxy-delta-5-steroid dehydrogenase, 3 beta- and steroid delta-isomerase 4; predicted gene |      |          |          |
| <i>Hsd3b4</i>   | 10681; predicted gene 4450                                                                   | 1.29 | 0.032544 | 0.955027 |
| <i>Olfr830</i>  | olfactory receptor 830                                                                       | 1.29 | 0.027858 | 0.945337 |
| <i>Atp5s</i>    | ATP synthase, H+ transporting, mitochondrial F0 complex, subunit S                           | 1.29 | 0.035169 | 0.955604 |
| <i>Tspan15</i>  | tetraspanin 15                                                                               | 1.3  | 0.031601 | 0.955027 |
| <i>Atpaf1</i>   | ATP synthase mitochondrial F1 complex assembly factor 1                                      | 1.3  | 0.015746 | 0.934625 |
| <i>Igfbp4</i>   | insulin-like growth factor binding protein 4                                                 | 1.3  | 0.044504 | 0.955604 |
| <i>Jmjd6</i>    | jumonji domain containing 6                                                                  | 1.3  | 0.038224 | 0.955604 |
| <i>Prss54</i>   | protease, serine 54                                                                          | 1.3  | 0.037137 | 0.955604 |
|                 | peroxisome proliferator activator receptor delta; RIKEN cDNA                                 |      |          |          |
| <i>Ppard</i>    | 1810013A23 gene                                                                              | 1.3  | 0.01894  | 0.934625 |
| <i>Olfr1322</i> | olfactory receptor 1322                                                                      | 1.3  | 0.033388 | 0.955444 |
| <i>Ccdc149</i>  | coiled-coil domain containing 149                                                            | 1.3  | 0.013527 | 0.925423 |
| <i>Olfr357</i>  | olfactory receptor 357                                                                       | 1.3  | 0.029054 | 0.955027 |
| <i>Foxa2</i>    | forkhead box A2                                                                              | 1.3  | 0.017342 | 0.934625 |
| <i>Olfr124</i>  | olfactory receptor 124                                                                       | 1.3  | 0.04156  | 0.955604 |
| <i>Ccdc138</i>  | coiled-coil domain containing 138                                                            | 1.3  | 0.013197 | 0.921556 |
| <i>Pgm3</i>     | phosphoglucomutase 3                                                                         | 1.3  | 0.029812 | 0.955027 |
| <i>Olfr1095</i> | olfactory receptor 1095                                                                      | 1.3  | 0.011947 | 0.894062 |
| <i>Zyg11a</i>   | zyg-11 family member A, cell cycle regulator                                                 | 1.3  | 0.044736 | 0.955604 |
| <i>Fkbp15</i>   | FK506 binding protein 15                                                                     | 1.3  | 0.008141 | 0.844803 |
|                 | hyaluronan and proteoglycan link protein 1                                                   |      |          |          |
| <i>Hapln1</i>   | protein 1                                                                                    | 1.3  | 0.016219 | 0.934625 |
| <i>Cacul1</i>   | CDK2 associated, cullin domain 1                                                             | 1.3  | 0.033739 | 0.955604 |
| <i>Rbm11</i>    | RNA binding motif protein 11                                                                 | 1.3  | 0.037787 | 0.955604 |
|                 | dehydrogenase/reductase (SDR family) member 7                                                |      |          |          |
| <i>Dhrs7</i>    | member 7                                                                                     | 1.31 | 0.038619 | 0.955604 |
| <i>S100a16</i>  | S100 calcium binding protein A16                                                             | 1.31 | 0.031956 | 0.955027 |
| <i>Rnf181</i>   | ring finger protein 181                                                                      | 1.31 | 0.028279 | 0.945337 |
|                 | ectopic P-granules autophagy protein 5 homolog (C. elegans)                                  |      |          |          |
| <i>Epg5</i>     | homolog (C. elegans)                                                                         | 1.31 | 0.014753 | 0.934625 |
|                 | CKLF-like MARVEL transmembrane domain containing 6                                           |      |          |          |
| <i>Cmtm6</i>    | domain containing 6                                                                          | 1.31 | 0.044109 | 0.955604 |
|                 | DnaJ (Hsp40) homolog, subfamily C, member 16                                                 |      |          |          |
| <i>Dnajc16</i>  | member 16                                                                                    | 1.31 | 0.019846 | 0.934625 |
| <i>Cd226</i>    | CD226 antigen                                                                                | 1.31 | 0.0076   | 0.832777 |
| <i>Rnf6</i>     | ring finger protein (C3H2C3 type) 6                                                          | 1.31 | 0.001166 | 0.661654 |
| <i>Susd6</i>    | sushi domain containing 6                                                                    | 1.31 | 0.011663 | 0.892484 |
|                 | NADH dehydrogenase (ubiquinone) 1 alpha subcomplex assembly factor 7                         |      |          |          |
| <i>Ndufaf7</i>  | alpha subcomplex assembly factor 7                                                           | 1.31 | 0.024364 | 0.934625 |
| <i>Rnf2</i>     | ring finger protein 2                                                                        | 1.31 | 0.036161 | 0.955604 |
| <i>Xpo4</i>     | exportin 4                                                                                   | 1.31 | 0.033194 | 0.955027 |

|                    |                                                                                                                                                                                                                                                                                                                                                                |      |          |          |
|--------------------|----------------------------------------------------------------------------------------------------------------------------------------------------------------------------------------------------------------------------------------------------------------------------------------------------------------------------------------------------------------|------|----------|----------|
| <i>Ror2</i>        | receptor tyrosine kinase-like orphan receptor 2                                                                                                                                                                                                                                                                                                                | 1.31 | 0.009458 | 0.858114 |
|                    | protocadherin alpha subfamily C, 1; protocadherin alpha subfamily C, 2; protocadherin alpha 4; protocadherin alpha 6; protocadherin alpha 7; protocadherin alpha 5; protocadherin alpha 11; protocadherin alpha 10; protocadherin alpha 1; protocadherin alpha 9; protocadherin alpha 3; protocadherin alpha 12; protocadherin alpha 2; protocadherin alpha 8; |      |          |          |
| <i>Pcdhac1</i>     | predicted gene, 37013                                                                                                                                                                                                                                                                                                                                          | 1.31 | 0.033139 | 0.955027 |
| <i>Slitrk1</i>     | SLIT and NTRK-like family, member 1                                                                                                                                                                                                                                                                                                                            | 1.31 | 0.004687 | 0.790387 |
| <i>Tbc1d20</i>     | TBC1 domain family, member 20                                                                                                                                                                                                                                                                                                                                  | 1.32 | 0.003473 | 0.720729 |
| <i>Tmem204</i>     | transmembrane protein 204                                                                                                                                                                                                                                                                                                                                      | 1.32 | 0.016938 | 0.934625 |
| <i>Prss2</i>       | protease, serine 2                                                                                                                                                                                                                                                                                                                                             | 1.32 | 0.048563 | 0.955604 |
| <i>Tmem88</i>      | transmembrane protein 88                                                                                                                                                                                                                                                                                                                                       | 1.32 | 0.028935 | 0.955027 |
| <i>Eif6</i>        | eukaryotic translation initiation factor 6                                                                                                                                                                                                                                                                                                                     | 1.32 | 0.03412  | 0.955604 |
| <i>Mgme1</i>       | mitochondrial genome maintainance exonuclease 1                                                                                                                                                                                                                                                                                                                | 1.32 | 0.016927 | 0.934625 |
| <i>Vmn2r78</i>     | vomer nasal 2, receptor 78                                                                                                                                                                                                                                                                                                                                     | 1.32 | 0.048032 | 0.955604 |
| <i>Asph</i>        | aspartate-beta-hydroxylase                                                                                                                                                                                                                                                                                                                                     | 1.32 | 0.001909 | 0.661654 |
| <i>Psm6</i>        | proteasome (prosome, macropain) 26S subunit, non-ATPase, 6                                                                                                                                                                                                                                                                                                     | 1.32 | 0.046359 | 0.955604 |
| <i>Krt222</i>      | keratin 222                                                                                                                                                                                                                                                                                                                                                    | 1.32 | 0.016801 | 0.934625 |
| <i>Gja6</i>        | gap junction protein, alpha 6                                                                                                                                                                                                                                                                                                                                  | 1.33 | 0.03056  | 0.955027 |
| <i>Ccdc126</i>     | coiled-coil domain containing 126                                                                                                                                                                                                                                                                                                                              | 1.33 | 0.024407 | 0.934625 |
| <i>Bcl2l15</i>     | BCL2-like 15                                                                                                                                                                                                                                                                                                                                                   | 1.33 | 0.022682 | 0.934625 |
| <i>Lrrc4c</i>      | leucine rich repeat containing 4C                                                                                                                                                                                                                                                                                                                              | 1.33 | 0.044954 | 0.955604 |
| <i>Olfr1000</i>    | olfactory receptor 1000                                                                                                                                                                                                                                                                                                                                        | 1.33 | 0.013357 | 0.923987 |
|                    | DEAD (Asp-Glu-Ala-Asp) box                                                                                                                                                                                                                                                                                                                                     |      |          |          |
| <i>Ddx47</i>       | polypeptide 47                                                                                                                                                                                                                                                                                                                                                 | 1.33 | 0.038092 | 0.955604 |
| <i>Sort1</i>       | sortilin 1                                                                                                                                                                                                                                                                                                                                                     | 1.33 | 0.007222 | 0.828491 |
| <i>Tbc1d22a</i>    | TBC1 domain family, member 22a                                                                                                                                                                                                                                                                                                                                 | 1.33 | 0.024889 | 0.93844  |
|                    | ArfGAP with coiled-coil, ankyrin repeat and PH domains 1                                                                                                                                                                                                                                                                                                       |      |          |          |
| <i>Acap1</i>       | potassium voltage gated channel,                                                                                                                                                                                                                                                                                                                               | 1.33 | 0.035535 | 0.955604 |
| <i>Kcnc3</i>       | Shaw-related subfamily, member 3                                                                                                                                                                                                                                                                                                                               | 1.33 | 0.001125 | 0.661654 |
|                    | cytoplasmic polyadenylated homeobox                                                                                                                                                                                                                                                                                                                            |      |          |          |
| <i>Cphx3</i>       | 3                                                                                                                                                                                                                                                                                                                                                              | 1.33 | 0.01001  | 0.871735 |
| <i>Ccdc189</i>     | coiled-coil domain containing 189                                                                                                                                                                                                                                                                                                                              | 1.33 | 0.004797 | 0.790387 |
| <i>Tmem70</i>      | transmembrane protein 70                                                                                                                                                                                                                                                                                                                                       | 1.33 | 0.021683 | 0.934625 |
| <i>Otud7a</i>      | OTU domain containing 7A                                                                                                                                                                                                                                                                                                                                       | 1.33 | 0.0067   | 0.807179 |
|                    | pleckstrin and Sec7 domain containing                                                                                                                                                                                                                                                                                                                          |      |          |          |
| <i>Psd3</i>        | 3                                                                                                                                                                                                                                                                                                                                                              | 1.33 | 0.027353 | 0.944116 |
| <i>Maml1</i>       | mastermind like 1 (Drosophila)                                                                                                                                                                                                                                                                                                                                 | 1.34 | 0.002583 | 0.690171 |
| <i>Olfr237-ps1</i> | olfactory receptor 237, pseudogene 1                                                                                                                                                                                                                                                                                                                           | 1.34 | 0.045114 | 0.955604 |

|                 |                                                           |      |          |          |
|-----------------|-----------------------------------------------------------|------|----------|----------|
| <i>Esrra</i>    | estrogen related receptor, alpha;<br>microRNA 6990        | 1.34 | 0.018668 | 0.934625 |
| <i>Ppt1</i>     | palmitoyl-protein thioesterase 1                          | 1.34 | 0.040717 | 0.955604 |
| <i>Plscr3</i>   | phospholipid scramblase 3                                 | 1.34 | 0.017514 | 0.934625 |
| <i>Ilf2</i>     | interleukin enhancer binding factor 2                     | 1.34 | 0.012664 | 0.905716 |
| <i>Hunk</i>     | hormonally upregulated Neu-<br>associated kinase          | 1.34 | 0.009239 | 0.858114 |
| <i>Abi1</i>     | abl-interactor 1                                          | 1.35 | 0.042733 | 0.955604 |
| <i>Cdhr4</i>    | cadherin-related family member 4                          | 1.35 | 0.005715 | 0.801647 |
| <i>Olf1391</i>  | olfactory receptor 1391                                   | 1.35 | 0.004735 | 0.790387 |
| <i>Fam78b</i>   | family with sequence similarity 78,<br>member B           | 1.35 | 0.020245 | 0.934625 |
| <i>Mtpap</i>    | mitochondrial poly(A) polymerase                          | 1.35 | 0.004849 | 0.791718 |
| <i>Sord</i>     | sorbitol dehydrogenase                                    | 1.35 | 0.002942 | 0.693971 |
| <i>Mrpl49</i>   | mitochondrial ribosomal protein L49                       | 1.35 | 0.001345 | 0.661654 |
| <i>Tlr7</i>     | toll-like receptor 7                                      | 1.35 | 0.008822 | 0.858114 |
| <i>Vash1</i>    | vasohibin 1                                               | 1.35 | 0.039024 | 0.955604 |
| <i>Gtf2h2</i>   | general transcription factor II H,<br>polypeptide 2       | 1.36 | 0.035315 | 0.955604 |
| <i>Srd5a3</i>   | steroid 5 alpha-reductase 3                               | 1.36 | 0.034059 | 0.955604 |
| <i>Gpr176</i>   | G protein-coupled receptor 176                            | 1.36 | 0.013609 | 0.925423 |
| <i>Krt19</i>    | keratin 19                                                | 1.36 | 0.016606 | 0.934625 |
| <i>Psmc2</i>    | proteasome (prosome, macropain) 26S<br>subunit, ATPase 2  | 1.36 | 0.039489 | 0.955604 |
| <i>Wdr24</i>    | WD repeat domain 24                                       | 1.36 | 0.044395 | 0.955604 |
| <i>Kcnq1</i>    | potassium voltage-gated channel,<br>subfamily Q, member 1 | 1.36 | 0.045114 | 0.955604 |
| <i>Bcl11a</i>   | B cell CLL/lymphoma 11A (zinc finger<br>protein)          | 1.36 | 0.011662 | 0.892484 |
| <i>Clec4g</i>   | C-type lectin domain family 4, member<br>g                | 1.36 | 0.024229 | 0.934625 |
| <i>Olf328</i>   | olfactory receptor 328                                    | 1.36 | 0.018975 | 0.934625 |
| <i>Bysl</i>     | bystin-like                                               | 1.36 | 0.043428 | 0.955604 |
| <i>Mtg1</i>     | mitochondrial GTPase 1 homolog (S.<br>cerevisiae)         | 1.36 | 0.035483 | 0.955604 |
| <i>Cyp2b9</i>   | cytochrome P450, family 2, subfamily<br>b, polypeptide 9  | 1.36 | 0.018949 | 0.934625 |
| <i>Vmn1r29</i>  | vomer nasal 1 receptor 29                                 | 1.37 | 0.048896 | 0.955604 |
| <i>Setmar</i>   | SET domain without mariner<br>transposase fusion          | 1.37 | 0.027985 | 0.945337 |
| <i>Tmem120b</i> | transmembrane protein 120B                                | 1.37 | 0.043268 | 0.955604 |
| <i>Pm20d2</i>   | peptidase M20 domain containing 2                         | 1.37 | 0.023456 | 0.934625 |
| <i>Cxcl11</i>   | chemokine (C-X-C motif) ligand 11                         | 1.37 | 0.000534 | 0.56096  |
| <i>Farsb</i>    | phenylalanyl-tRNA synthetase, beta<br>subunit             | 1.37 | 0.049587 | 0.955604 |
| <i>Oxr1</i>     | oxidation resistance 1                                    | 1.37 | 0.005722 | 0.801647 |
| <i>Gltscr1</i>  | glioma tumor suppressor candidate<br>region gene 1        | 1.38 | 0.012802 | 0.905716 |
| <i>Impa1</i>    | inositol (myo)-1(or 4)-                                   | 1.38 | 0.001519 | 0.661654 |



|                  |                                                                       |      |          |          |
|------------------|-----------------------------------------------------------------------|------|----------|----------|
|                  | monophosphatase 1                                                     |      |          |          |
| <i>Atp2c1</i>    | ATPase, Ca <sup>++</sup> -sequestering                                | 1.38 | 0.032757 | 0.955027 |
| <i>Sphk2</i>     | sphingosine kinase 2                                                  | 1.38 | 0.037365 | 0.955604 |
| <i>Btbd6</i>     | BTB (POZ) domain containing 6                                         | 1.38 | 0.046721 | 0.955604 |
| <i>Dctn5</i>     | dynactin 5                                                            | 1.38 | 0.032852 | 0.955027 |
| <i>Socs4</i>     | suppressor of cytokine signaling 4                                    | 1.38 | 0.043511 | 0.955604 |
| <i>Klhl28</i>    | kelch-like 28                                                         | 1.38 | 0.045953 | 0.955604 |
| <i>Borcs5</i>    | BLOC-1 related complex subunit 5                                      | 1.38 | 0.026335 | 0.944116 |
| <i>Sh3bp5</i>    | SH3-domain binding protein 5 (BTK-associated)                         | 1.38 | 0.017963 | 0.934625 |
| <i>Ptdss1</i>    | phosphatidylserine synthase 1                                         | 1.38 | 0.01513  | 0.934625 |
| <i>Zfp133-ps</i> | zinc finger protein 133, pseudogene; zinc finger protein pseudogene   | 1.39 | 0.02226  | 0.934625 |
| <i>Fsd2</i>      | fibronectin type III and SPRY domain containing 2                     | 1.39 | 0.016985 | 0.934625 |
| <i>Fam162a</i>   | family with sequence similarity 162, member A                         | 1.39 | 0.01425  | 0.934625 |
| <i>Vasn</i>      | vasorin                                                               | 1.39 | 0.024224 | 0.934625 |
| <i>Clybl</i>     | citrate lyase beta like                                               | 1.39 | 0.036388 | 0.955604 |
| <i>Lrrc48</i>    | leucine rich repeat containing 48                                     | 1.39 | 0.015832 | 0.934625 |
| <i>Kcnk12</i>    | potassium channel, subfamily K, member 12                             | 1.39 | 0.013333 | 0.923987 |
| <i>Pias3</i>     | protein inhibitor of activated STAT 3                                 | 1.39 | 0.049163 | 0.955604 |
| <i>Tipr1</i>     | TIP41, TOR signalling pathway regulator-like ( <i>S. cerevisiae</i> ) | 1.39 | 0.023827 | 0.934625 |
| <i>Mtmr12</i>    | myotubularin related protein 12                                       | 1.39 | 0.007824 | 0.835337 |
| <i>Extl2</i>     | exostoses (multiple)-like 2                                           | 1.4  | 0.044623 | 0.955604 |
| <i>Prkab1</i>    | protein kinase, AMP-activated, beta 1 non-catalytic subunit           | 1.4  | 0.022856 | 0.934625 |
| <i>Tmem81</i>    | transmembrane protein 81                                              | 1.4  | 0.049117 | 0.955604 |
| <i>Aldh18a1</i>  | aldehyde dehydrogenase 18 family, member A1                           | 1.4  | 0.028133 | 0.945337 |
| <i>Zpbp2</i>     | zona pellucida binding protein 2                                      | 1.4  | 0.003292 | 0.709391 |
| <i>Krt26</i>     | keratin 26                                                            | 1.4  | 0.012099 | 0.895556 |
| <i>Polr2d</i>    | polymerase (RNA) II (DNA directed) polypeptide D                      | 1.4  | 0.01775  | 0.934625 |
| <i>Abcg8</i>     | ATP-binding cassette, sub-family G (WHITE), member 8                  | 1.4  | 0.041695 | 0.955604 |
| <i>Lrrc45</i>    | leucine rich repeat containing 45                                     | 1.4  | 0.029529 | 0.955027 |
| <i>Coq7</i>      | demethyl-Q 7                                                          | 1.4  | 0.001761 | 0.661654 |
| <i>Tomm70a</i>   | translocase of outer mitochondrial membrane 70 homolog A (yeast)      | 1.41 | 0.001919 | 0.661654 |
| <i>Haus6</i>     | HAUS augmin-like complex, subunit 6                                   | 1.41 | 0.036743 | 0.955604 |
| <i>Pomgnt1</i>   | protein O-linked mannose beta 1,2-N-acetylglucosaminyltransferase     | 1.41 | 0.026178 | 0.944116 |
| <i>Cypt8</i>     | cysteine-rich perinuclear theca 8; cysteine-rich perinuclear theca 7; | 1.41 | 0.037227 | 0.955604 |
| <i>Pdk3</i>      | cysteine-rich perinuclear theca 1 pyruvate dehydrogenase kinase,      | 1.41 | 0.011234 | 0.872249 |

|                 |                                                                                  |      |          |          |
|-----------------|----------------------------------------------------------------------------------|------|----------|----------|
|                 | isoenzyme 3                                                                      |      |          |          |
| <i>Csn1s2b</i>  | casein alpha s2-like B                                                           | 1.41 | 0.040759 | 0.955604 |
| <i>Nsun2</i>    | NOL1/NOP2/Sun domain family member 2                                             | 1.41 | 0.003103 | 0.699764 |
| <i>Wasf1</i>    | WAS protein family, member 1                                                     | 1.41 | 0.016547 | 0.934625 |
| <i>Olf1447</i>  | olfactory receptor 1447                                                          | 1.41 | 0.021255 | 0.934625 |
| <i>Edrf1</i>    | erythroid differentiation regulatory factor 1                                    | 1.41 | 0.026174 | 0.944116 |
| <i>Fbxw9</i>    | F-box and WD-40 domain protein 9                                                 | 1.41 | 0.031435 | 0.955027 |
| <i>Cep126</i>   | centrosomal protein 126                                                          | 1.42 | 0.038077 | 0.955604 |
| <i>Pou3f1</i>   | POU domain, class 3, transcription factor 1                                      | 1.42 | 0.039471 | 0.955604 |
| <i>Efhc2</i>    | EF-hand domain (C-terminal) containing 2                                         | 1.42 | 0.028087 | 0.945337 |
| <i>Dok4</i>     | docking protein 4                                                                | 1.42 | 0.002673 | 0.690171 |
| <i>Kirrel2</i>  | kin of IRRE like 2 ( <i>Drosophila</i> )                                         | 1.42 | 0.048421 | 0.955604 |
| <i>Ndufb11</i>  | NADH dehydrogenase (ubiquinone) 1 beta subcomplex, 11                            | 1.42 | 0.003685 | 0.724181 |
|                 | PREDICTED: family with sequence similarity 81, member B ( <i>Fam81b</i> ), mRNA. |      |          |          |
| <i>Fam81b</i>   |                                                                                  | 1.42 | 0.015474 | 0.934625 |
| <i>Xcr1</i>     | chemokine (C motif) receptor 1                                                   | 1.42 | 0.041257 | 0.955604 |
| <i>Mtl5</i>     | metallothionein-like 5, testis-specific (tesmin)                                 | 1.42 | 0.03459  | 0.955604 |
| <i>Tbx22</i>    | T-box 22                                                                         | 1.42 | 0.027378 | 0.944116 |
| <i>Slc2a2</i>   | solute carrier family 2 (facilitated glucose transporter), member 2              | 1.42 | 0.028027 | 0.945337 |
| <i>Tyw3</i>     | tRNA-yW synthesizing protein 3 homolog ( <i>S. cerevisiae</i> )                  | 1.42 | 0.049233 | 0.955604 |
| <i>Zfp277</i>   | zinc finger protein 277                                                          | 1.43 | 0.037415 | 0.955604 |
| <i>Mrgprb4</i>  | MAS-related GPR, member B4                                                       | 1.43 | 0.000843 | 0.608562 |
| <i>Sla2</i>     | Src-like-adaptor 2                                                               | 1.43 | 0.041156 | 0.955604 |
| <i>Pgam2</i>    | phosphoglycerate mutase 2                                                        | 1.43 | 0.012266 | 0.902392 |
| <i>Tec</i>      | tec protein tyrosine kinase                                                      | 1.43 | 0.038926 | 0.955604 |
| <i>Trappc1</i>  | trafficking protein particle complex 1                                           | 1.43 | 0.039666 | 0.955604 |
| <i>Neurod2</i>  | neurogenic differentiation 2                                                     | 1.43 | 0.002218 | 0.661654 |
| <i>Coro2b</i>   | coronin, actin binding protein, 2B                                               | 1.44 | 0.02997  | 0.955027 |
| <i>Tti1</i>     | TELO2 interacting protein 1                                                      | 1.44 | 0.028015 | 0.945337 |
| <i>Bckdk</i>    | branched chain ketoacid dehydrogenase kinase                                     | 1.44 | 0.005453 | 0.801647 |
| <i>Pde1a</i>    | phosphodiesterase 1A, calmodulin-dependent                                       | 1.44 | 0.017229 | 0.934625 |
| <i>Rps6ka4</i>  | ribosomal protein S6 kinase, polypeptide 4; microRNA 5046                        | 1.45 | 0.044513 | 0.955604 |
| <i>Slco1c1</i>  | solute carrier organic anion transporter family, member 1c1                      | 1.45 | 0.020942 | 0.934625 |
| <i>Slc25a35</i> | solute carrier family 25, member 35                                              | 1.45 | 0.022256 | 0.934625 |
| <i>Sorl1</i>    | sortilin-related receptor, LDLR class A repeats-containing                       | 1.45 | 0.024166 | 0.934625 |

|                  |                                                                                                                       |      |          |          |
|------------------|-----------------------------------------------------------------------------------------------------------------------|------|----------|----------|
| <i>Masp1</i>     | mannan-binding lectin serine peptidase<br>1                                                                           | 1.45 | 0.003872 | 0.754291 |
| <i>Gpd1l</i>     | glycerol-3-phosphate dehydrogenase<br>1-like                                                                          | 1.45 | 0.01934  | 0.934625 |
| <i>Usp3</i>      | ubiquitin specific peptidase 3                                                                                        | 1.46 | 0.014879 | 0.934625 |
| <i>Ptpmt1</i>    | protein tyrosine phosphatase,<br>mitochondrial 1                                                                      | 1.46 | 0.020785 | 0.934625 |
| <i>Tmem68</i>    | transmembrane protein 68                                                                                              | 1.46 | 0.000899 | 0.608562 |
| <i>Slc16a1</i>   | solute carrier family 16<br>(monocarboxylic acid transporters),<br>member 1                                           | 1.46 | 0.001755 | 0.661654 |
| <i>Olf1213</i>   | olfactory receptor 1213                                                                                               | 1.46 | 0.027466 | 0.944116 |
| <i>Psmb5</i>     | proteasome (prosome, macropain)<br>subunit, beta type 5; microRNA 686                                                 | 1.46 | 0.006496 | 0.801647 |
| <i>Pex5l</i>     | peroxisomal biogenesis factor 5-like                                                                                  | 1.46 | 0.038812 | 0.955604 |
| <i>Pbdc1</i>     | polysaccharide biosynthesis domain<br>containing 1                                                                    | 1.46 | 0.038834 | 0.955604 |
| <i>Pgm2l1</i>    | phosphoglucomutase 2-like 1                                                                                           | 1.46 | 0.003151 | 0.699764 |
| <i>Lrrc59</i>    | leucine rich repeat containing 59                                                                                     | 1.47 | 0.008762 | 0.858114 |
| <i>Prpt3</i>     | proline-rich transmembrane protein 3                                                                                  | 1.47 | 0.041875 | 0.955604 |
| <i>Klhl12</i>    | kelch-like 12                                                                                                         | 1.47 | 0.03893  | 0.955604 |
| <i>Zfp46</i>     | zinc finger protein 46                                                                                                | 1.47 | 0.03694  | 0.955604 |
| <i>Zdhhc5</i>    | zinc finger, DHHC domain containing 5                                                                                 | 1.47 | 0.044639 | 0.955604 |
| <i>Tpst1</i>     | protein-tyrosine sulfotransferase 1                                                                                   | 1.48 | 0.02416  | 0.934625 |
| <i>Gins4</i>     | GIN5 complex subunit 4 (Sld5 homolog)<br>Hermansky-Pudlak syndrome 1                                                  | 1.48 | 0.017093 | 0.934625 |
| <i>Hps1</i>      | homolog (human)<br>pleckstrin homology domain<br>containing, family A (phosphoinositide<br>binding specific) member 4 | 1.48 | 0.042685 | 0.955604 |
| <i>Plekha4</i>   |                                                                                                                       | 1.48 | 0.031877 | 0.955027 |
| <i>Fbxw2</i>     | F-box and WD-40 domain protein 2                                                                                      | 1.48 | 0.022448 | 0.934625 |
| <i>Kif1bp</i>    | KIF1 binding protein                                                                                                  | 1.48 | 0.021112 | 0.934625 |
| <i>Neto1</i>     | neuropilin (NRP) and tolloid (TLL)-like 1                                                                             | 1.49 | 0.048364 | 0.955604 |
| <i>Oas1f</i>     | 2-5 oligoadenylate synthetase 1F; 2'-5'<br>oligoadenylate synthetase 1F                                               | 1.49 | 0.004624 | 0.790387 |
| <i>Hist2h2be</i> | histone cluster 2, H2be                                                                                               | 1.49 | 0.005087 | 0.801155 |
| <i>Prpf3</i>     | PRP3 pre-mRNA processing factor 3<br>homolog (yeast)                                                                  | 1.5  | 0.046284 | 0.955604 |
| <i>Otulin</i>    | OTU deubiquitinase with linear linkage<br>specificity                                                                 | 1.5  | 0.006382 | 0.801647 |
| <i>Paox</i>      | polyamine oxidase (exo-N4-amino)                                                                                      | 1.5  | 0.00938  | 0.858114 |
| <i>Cd46</i>      | CD46 antigen, complement regulatory<br>protein                                                                        | 1.5  | 0.030999 | 0.955027 |
| <i>Ugg2</i>      | UDP-glucose glycoprotein                                                                                              | 1.5  | 0.043091 | 0.955604 |
| <i>Ugg2</i>      | glucosyltransferase 2                                                                                                 | 1.5  | 0.043091 | 0.955604 |
| <i>Figf</i>      | c-fos induced growth factor                                                                                           | 1.5  | 0.025874 | 0.944116 |
| <i>Hs6st3</i>    | heparan sulfate 6-O-sulfotransferase 3                                                                                | 1.51 | 0.022784 | 0.934625 |
| <i>Setdb2</i>    | SET domain, bifurcated 2; PHD finger<br>protein 11C; PHD finger protein 11D                                           | 1.51 | 0.035697 | 0.955604 |

|                 |                                                                                                               |      |          |          |
|-----------------|---------------------------------------------------------------------------------------------------------------|------|----------|----------|
| <i>Jph1</i>     | junctophilin 1                                                                                                | 1.51 | 0.017934 | 0.934625 |
| <i>Sly</i>      | Sycp3 like Y-linked<br>NADH dehydrogenase (ubiquinone) Fe-<br>S protein 1                                     | 1.51 | 0.02661  | 0.944116 |
| <i>Ndufs1</i>   |                                                                                                               | 1.51 | 0.007056 | 0.828491 |
| <i>Olf1453</i>  | olfactory receptor 1453                                                                                       | 1.52 | 0.003368 | 0.711257 |
| <i>Dnd1</i>     | dead end homolog 1 (zebrafish)                                                                                | 1.52 | 0.012761 | 0.905716 |
| <i>Cars</i>     | cysteinyl-tRNA synthetase                                                                                     | 1.52 | 0.041808 | 0.955604 |
| <i>Btbd10</i>   | BTB (POZ) domain containing 10                                                                                | 1.52 | 0.00071  | 0.608562 |
| <i>Nfix</i>     | nuclear factor I/X                                                                                            | 1.52 | 0.039562 | 0.955604 |
| <i>Cav2</i>     | caveolin 2                                                                                                    | 1.52 | 0.025296 | 0.939355 |
| <i>Nol8</i>     | nucleolar protein 8<br>membrane-associated ring finger                                                        | 1.53 | 0.0357   | 0.955604 |
| <i>9-Mar</i>    | (C3HC4) 9                                                                                                     | 1.53 | 0.0033   | 0.709391 |
| <i>Plscr4</i>   | phospholipid scramblase 4                                                                                     | 1.53 | 0.042491 | 0.955604 |
| <i>Fem1a</i>    | feminization 1 homolog a (C. elegans)                                                                         | 1.54 | 0.011825 | 0.894062 |
| <i>Olf1199</i>  | olfactory receptor 1199<br>acyl-Coenzyme A dehydrogenase,<br>medium chain                                     | 1.54 | 0.04831  | 0.955604 |
| <i>Acadm</i>    |                                                                                                               | 1.54 | 0.000904 | 0.608562 |
| <i>Olf1487</i>  | olfactory receptor 1487                                                                                       | 1.54 | 0.006253 | 0.801647 |
| <i>Polr1e</i>   | polymerase (RNA) I polypeptide E                                                                              | 1.54 | 0.037262 | 0.955604 |
| <i>Nlrp2</i>    | NLR family, pyrin domain containing 2                                                                         | 1.54 | 0.021808 | 0.934625 |
| <i>Il4ra</i>    | interleukin 4 receptor, alpha<br>late cornified envelope-like proline-rich<br>1                               | 1.54 | 0.022378 | 0.934625 |
| <i>Lelp1</i>    |                                                                                                               | 1.54 | 0.004132 | 0.770544 |
| <i>Syne1</i>    | spectrin repeat containing, nuclear<br>envelope 1                                                             | 1.55 | 0.03073  | 0.955027 |
| <i>Zmat5</i>    | zinc finger, matrin type 5                                                                                    | 1.55 | 0.045868 | 0.955604 |
| <i>Msra</i>     | methionine sulfoxide reductase A                                                                              | 1.55 | 0.021317 | 0.934625 |
| <i>Chia1</i>    | chitinase, acidic 1<br>family with sequence similarity 151,<br>member B                                       | 1.55 | 0.028175 | 0.945337 |
| <i>Fam151b</i>  |                                                                                                               | 1.55 | 0.040927 | 0.955604 |
| <i>Prp2</i>     | proline rich protein 2                                                                                        | 1.55 | 0.005148 | 0.801598 |
| <i>Iqj</i>      | IQ motif containing J                                                                                         | 1.55 | 0.022767 | 0.934625 |
| <i>Vimp</i>     | VCP-interacting membrane protein                                                                              | 1.56 | 0.020725 | 0.934625 |
| <i>Zfand3</i>   | zinc finger, AN1-type domain 3<br>synaptonemal complex central element<br>protein 2                           | 1.56 | 0.042693 | 0.955604 |
| <i>Syce2</i>    |                                                                                                               | 1.56 | 0.04324  | 0.955604 |
| <i>Slc4a10</i>  | solute carrier family 4, sodium<br>bicarbonate cotransporter-like,<br>member 10                               | 1.56 | 0.026626 | 0.944116 |
| <i>Zg16</i>     | zymogen granule protein 16<br>potassium voltage-gated channel,<br>delayed-rectifier, subfamily S, member<br>3 | 1.57 | 0.036798 | 0.955604 |
| <i>Kcns3</i>    |                                                                                                               | 1.57 | 0.023259 | 0.934625 |
| <i>Slc25a15</i> | solute carrier family 25 (mitochondrial<br>carrier ornithine transporter), member<br>15                       | 1.58 | 0.001884 | 0.661654 |
| <i>Cmah</i>     | cytidine monophospho-N-<br>acetylneuraminic acid hydroxylase                                                  | 1.58 | 0.005441 | 0.801647 |

|                  |                                                                               |      |          |          |
|------------------|-------------------------------------------------------------------------------|------|----------|----------|
| <i>Akr1c12</i>   | aldo-keto reductase family 1, member C12                                      | 1.58 | 0.000069 | 0.503007 |
| <i>Capns2</i>    | calpain, small subunit 2                                                      | 1.58 | 0.013836 | 0.925423 |
| <i>Nanp</i>      | N-acetylneuraminic acid phosphatase                                           | 1.58 | 0.005386 | 0.801647 |
| <i>Tex29</i>     | testis expressed 29                                                           | 1.59 | 0.011876 | 0.894062 |
| <i>Lrp4</i>      | low density lipoprotein receptor-related protein 4                            | 1.59 | 0.007042 | 0.828491 |
| <i>Mex3b</i>     | mex3 homolog B (C. elegans)                                                   | 1.59 | 0.013818 | 0.925423 |
| <i>Zbtb18</i>    | zinc finger and BTB domain containing 18                                      | 1.59 | 0.006559 | 0.804731 |
| <i>Lpar6</i>     | lysophosphatidic acid receptor 6                                              | 1.6  | 0.027406 | 0.944116 |
| <i>Abcg2</i>     | ATP-binding cassette, sub-family G (WHITE), member 2                          | 1.6  | 0.03636  | 0.955604 |
| <i>Sgk3</i>      | serum/glucocorticoid regulated kinase 3                                       | 1.61 | 0.0073   | 0.828491 |
| <i>Cyp3a11</i>   | cytochrome P450, family 3, subfamily a, polypeptide 11                        | 1.61 | 0.010868 | 0.872249 |
| <i>Wdr73</i>     | WD repeat domain 73                                                           | 1.61 | 0.005244 | 0.801647 |
| <i>Dr1</i>       | down-regulator of transcription 1                                             | 1.61 | 0.038924 | 0.955604 |
| <i>Fam134b</i>   | family with sequence similarity 134, member B                                 | 1.62 | 0.01916  | 0.934625 |
| <i>Olfr1014</i>  | olfactory receptor 1014                                                       | 1.62 | 0.019387 | 0.934625 |
| <i>Cdc25b</i>    | cell division cycle 25B                                                       | 1.62 | 0.02822  | 0.945337 |
| <i>Grin2a</i>    | glutamate receptor, ionotropic, NMDA2A (epsilon 1)                            | 1.62 | 0.008618 | 0.858114 |
| <i>Tmem178</i>   | transmembrane protein 178                                                     | 1.62 | 0.042096 | 0.955604 |
| <i>Mmgt1</i>     | membrane magnesium transporter 1; microRNA 5116                               | 1.63 | 0.048737 | 0.955604 |
| <i>Pinx1</i>     | PIN2/TERF1 interacting, telomerase inhibitor 1                                | 1.64 | 0.000273 | 0.503007 |
| <i>Gsdmc4</i>    | gasdermin C4                                                                  | 1.64 | 0.044331 | 0.955604 |
| <i>Zdhhc23</i>   | zinc finger, DHHC domain containing 23                                        | 1.65 | 0.045468 | 0.955604 |
| <i>Hsd11b1</i>   | hydroxysteroid 11-beta dehydrogenase 1                                        | 1.65 | 0.020644 | 0.934625 |
| <i>Trim61</i>    | tripartite motif-containing 61; tripartite motif-containing 60                | 1.66 | 0.00208  | 0.661654 |
| <i>Mctp1</i>     | multiple C2 domains, transmembrane 1                                          | 1.67 | 0.03505  | 0.955604 |
| <i>Tuft1</i>     | tuftelin 1                                                                    | 1.67 | 0.022667 | 0.934625 |
| <i>Tars</i>      | threonyl-tRNA synthetase                                                      | 1.67 | 0.017162 | 0.934625 |
| <i>Snx33</i>     | sorting nexin 33                                                              | 1.68 | 0.01942  | 0.934625 |
| <i>Tmprss11d</i> | transmembrane protease, serine 11d                                            | 1.69 | 0.017973 | 0.934625 |
| <i>B3glct</i>    | beta-3-glucosyltransferase                                                    | 1.69 | 0.021623 | 0.934625 |
| <i>Svopl</i>     | SV2 related protein homolog (rat)-like trafficking protein particle complex 3 | 1.69 | 0.027636 | 0.945337 |
| <i>Trappc3l</i>  | like                                                                          | 1.7  | 0.009389 | 0.858114 |
| <i>Dsg1c</i>     | desmoglein 1 gamma                                                            | 1.71 | 0.005828 | 0.801647 |
| <i>Lce1e</i>     | late cornified envelope 1E                                                    | 1.72 | 0.007683 | 0.83388  |
| <i>Tmem139</i>   | transmembrane protein 139                                                     | 1.72 | 0.001896 | 0.661654 |
| <i>Vmn1r214</i>  | vomer nasal 1 receptor 214                                                    | 1.73 | 0.030523 | 0.955027 |

|                  |                                                                                                   |      |          |          |
|------------------|---------------------------------------------------------------------------------------------------|------|----------|----------|
| <i>Olfr693</i>   | olfactory receptor 693                                                                            | 1.74 | 0.021582 | 0.934625 |
| <i>Vmn1r36</i>   | vomeronasal 1 receptor 36                                                                         | 1.75 | 0.043994 | 0.955604 |
| <i>Cldn34-ps</i> | claudin 34, pseudogene                                                                            | 1.75 | 0.034525 | 0.955604 |
| <i>Sowahb</i>    | solowah ankryrin repeat domain family member B                                                    | 1.77 | 0.021008 | 0.934625 |
| <i>Irak2</i>     | interleukin-1 receptor-associated kinase 2                                                        | 1.78 | 0.048242 | 0.955604 |
| <i>Krtap14</i>   | keratin associated protein 14                                                                     | 1.78 | 0.025423 | 0.939355 |
| <i>Il1rap</i>    | interleukin 1 receptor accessory protein                                                          | 1.79 | 0.000187 | 0.503007 |
| <i>Slc37a4</i>   | solute carrier family 37 (glucose-6-phosphate transporter), member 4                              | 1.8  | 0.048923 | 0.955604 |
| <i>Cds1</i>      | CDP-diacylglycerol synthase 1                                                                     | 1.8  | 0.008025 | 0.844445 |
| <i>Olfr512</i>   | olfactory receptor 512                                                                            | 1.81 | 0.041203 | 0.955604 |
| <i>Stk32a</i>    | serine/threonine kinase 32A                                                                       | 1.82 | 0.014391 | 0.934625 |
| <i>Sult2b1</i>   | sulfotransferase family, cytosolic, 2B, member 1                                                  | 1.84 | 0.003128 | 0.699764 |
| <i>Olfr466</i>   | olfactory receptor 466                                                                            | 1.86 | 0.049412 | 0.955604 |
| <i>Sstr4</i>     | somatostatin receptor 4                                                                           | 1.86 | 0.00265  | 0.690171 |
| <i>Adra1d</i>    | adrenergic receptor, alpha 1d                                                                     | 1.88 | 0.007446 | 0.828491 |
| <i>Tenm3</i>     | teneurin transmembrane protein 3                                                                  | 1.93 | 0.034425 | 0.955604 |
| <i>Rnf166</i>    | ring finger protein 166                                                                           | 1.95 | 0.019923 | 0.934625 |
| <i>Chrna5</i>    | cholinergic receptor, nicotinic, alpha polypeptide 5                                              | 1.96 | 0.022122 | 0.934625 |
| <i>Olfr170</i>   | olfactory receptor 170                                                                            | 1.97 | 0.031828 | 0.955027 |
| <i>Epha4</i>     | Eph receptor A4                                                                                   | 1.99 | 0.039996 | 0.955604 |
| <i>Itpka</i>     | inositol 1,4,5-trisphosphate 3-kinase A                                                           | 1.99 | 0.003516 | 0.722869 |
| <i>Olfr774</i>   | olfactory receptor 774                                                                            | 2    | 0.001505 | 0.661654 |
| <i>Wdhd1</i>     | WD repeat and HMG-box DNA binding protein 1                                                       | 2    | 0.002069 | 0.661654 |
| <i>Fezf2</i>     | Fez family zinc finger 2                                                                          | 2    | 0.012798 | 0.905716 |
| <i>Cyp2c50</i>   | cytochrome P450, family 2, subfamily c, polypeptide 50                                            | 2.01 | 0.00037  | 0.503007 |
| <i>Cdh12</i>     | cadherin 12                                                                                       | 2.02 | 0.017625 | 0.934625 |
| <i>Olfr898</i>   | olfactory receptor 898                                                                            | 2.03 | 0.008748 | 0.858114 |
| <i>Galnt9</i>    | UDP-N-acetyl-alpha-D-galactosamine:polypeptide N-acetylgalactosaminyltransferase 9                | 2.09 | 0.019567 | 0.934625 |
| <i>Grp</i>       | gastrin releasing peptide; retina and anterior neural fold homeobox metallophosphoesterase domain | 2.11 | 0.045372 | 0.955604 |
| <i>Mpped1</i>    | containing 1                                                                                      | 2.14 | 0.011736 | 0.892484 |
| <i>Sema3e</i>    | sema domain, immunoglobulin domain (Ig), short basic domain, secreted, (semaphorin) 3E            | 2.19 | 0.045637 | 0.955604 |
| <i>Colgalt2</i>  | collagen beta(1-O)galactosyltransferase 2                                                         | 2.23 | 0.00923  | 0.858114 |
| <i>Rspo2</i>     | R-spondin 2                                                                                       | 2.32 | 0.010331 | 0.872249 |

**Table S3- Genes downregulated in the Amygdala of Ala92-Dio2 mice. (p<0.05)**

| <b>Gene Symbol</b> | <b>Description</b>                                                                      | <b>Fold Change (linear) (AA Amg vs. TT Amg)</b> | <b>ANOVA p-value (AA Amg vs. TT Amg)</b> | <b>FDR p-value (AA Amg vs. TT Amg)</b> |
|--------------------|-----------------------------------------------------------------------------------------|-------------------------------------------------|------------------------------------------|----------------------------------------|
| <i>Gpx3</i>        | glutathione peroxidase 3                                                                | -6.47                                           | 0.000963                                 | 0.626436                               |
| <i>Gabraq</i>      | gamma-aminobutyric acid (GABA) A receptor, subunit theta                                | -5                                              | 0.002044                                 | 0.661654                               |
| <i>Fezf1</i>       | Fez family zinc finger 1                                                                | -4.85                                           | 0.042001                                 | 0.955604                               |
| <i>Barhl2</i>      | BarH-like 2 (Drosophila)                                                                | -4.57                                           | 0.000239                                 | 0.503007                               |
| <i>Pbx3</i>        | pre B cell leukemia homeobox 3                                                          | -4.45                                           | 0.000848                                 | 0.608562                               |
| <i>Arhgap36</i>    | Rho GTPase activating protein 36                                                        | -3.8                                            | 0.021199                                 | 0.934625                               |
| <i>Gpr165</i>      | G protein-coupled receptor 165                                                          | -3.56                                           | 0.00998                                  | 0.871735                               |
| <i>Slc17a6</i>     | solute carrier family 17 (sodium-dependent inorganic phosphate cotransporter), member 6 | -3.55                                           | 0.021443                                 | 0.934625                               |
| <i>Ccdc42</i>      | coiled-coil domain containing 42                                                        | -3.45                                           | 0.019572                                 | 0.934625                               |
| <i>Glr1</i>        | glycine receptor, alpha 1 subunit                                                       | -3.29                                           | 0.020002                                 | 0.934625                               |
| <i>Cartpt</i>      | CART prepropeptide                                                                      | -3.16                                           | 0.000283                                 | 0.503007                               |
| <i>Tacr1</i>       | tachykinin receptor 1                                                                   | -3.15                                           | 0.009893                                 | 0.868305                               |
| <i>Mid1</i>        | midline 1                                                                               | -3.11                                           | 0.015198                                 | 0.934625                               |
| <i>Mid1</i>        | midline 1                                                                               | -3.11                                           | 0.015198                                 | 0.934625                               |
| <i>Mid1</i>        | midline 1                                                                               | -3.02                                           | 0.014825                                 | 0.934625                               |
| <i>Meis1</i>       | Meis homeobox 1                                                                         | -2.92                                           | 0.02671                                  | 0.944116                               |
| <i>Zim1</i>        | zinc finger, imprinted 1                                                                | -2.82                                           | 0.008436                                 | 0.857703                               |
| <i>Avp</i>         | arginine vasopressin                                                                    | -2.81                                           | 0.028306                                 | 0.945337                               |
| <i>Prlr</i>        | prolactin receptor                                                                      | -2.8                                            | 0.011985                                 | 0.894062                               |
| <i>Usp29</i>       | ubiquitin specific peptidase 29                                                         | -2.62                                           | 0.008725                                 | 0.858114                               |
| <i>Scg2</i>        | secretogranin II                                                                        | -2.59                                           | 0.00505                                  | 0.800974                               |
| <i>Tmem91</i>      | transmembrane protein 91                                                                | -2.57                                           | 0.032464                                 | 0.955027                               |
| <i>Vwc2l</i>       | von Willebrand factor C domain-containing protein 2-like                                | -2.43                                           | 0.044047                                 | 0.955604                               |
| <i>Nxph4</i>       | neurexophilin 4                                                                         | -2.38                                           | 0.015803                                 | 0.934625                               |
| <i>Magel2</i>      | melanoma antigen, family L, 2                                                           | -2.34                                           | 0.009835                                 | 0.866684                               |
| <i>Cdh4</i>        | cadherin 4                                                                              | -2.33                                           | 0.008459                                 | 0.857703                               |
| <i>Nova1</i>       | neuro-oncological ventral antigen 1                                                     | -2.22                                           | 0.014555                                 | 0.934625                               |
| <i>Glr3</i>        | glycine receptor, alpha 3 subunit                                                       | -2.22                                           | 0.041693                                 | 0.955604                               |
| <i>Lhfp13</i>      | lipoma HMGIC fusion partner-like 3                                                      | -2.18                                           | 0.013265                                 | 0.923367                               |
| <i>Susd2</i>       | sushi domain containing 2                                                               | -2.18                                           | 0.044703                                 | 0.955604                               |
| <i>Fndc9</i>       | fibronectin type III domain containing 9                                                | -2.14                                           | 0.002856                                 | 0.693971                               |
| <i>Ucp2</i>        | uncoupling protein 2 (mitochondrial, proton carrier)                                    | -2.14                                           | 0.008112                                 | 0.844803                               |
| <i>Baiap3</i>      | BAI1-associated protein 3                                                               | -2.09                                           | 0.001285                                 | 0.661654                               |
| <i>Itih3</i>       | inter-alpha trypsin inhibitor, heavy chain 3                                            | -2.08                                           | 0.010695                                 | 0.872249                               |
| <i>Gng4</i>        | guanine nucleotide binding protein (G protein), gamma 4                                 | -2.08                                           | 0.00214                                  | 0.661654                               |

|                 |                                                                                                                                             |       |          |          |
|-----------------|---------------------------------------------------------------------------------------------------------------------------------------------|-------|----------|----------|
| <i>Cyp26b1</i>  | cytochrome P450, family 26, subfamily b, polypeptide 1                                                                                      | -2.07 | 0.015217 | 0.934625 |
| <i>Entpd4</i>   | ectonucleoside triphosphate diphosphohydrolase 4                                                                                            | -2.06 | 0.039885 | 0.955604 |
| <i>Calcr</i>    | calcitonin receptor                                                                                                                         | -2.04 | 0.004054 | 0.76285  |
| <i>Mc3r</i>     | melanocortin 3 receptor                                                                                                                     | -2.03 | 0.000361 | 0.503007 |
| <i>Zcchc12</i>  | zinc finger, CCHC domain containing 12                                                                                                      | -1.99 | 0.009262 | 0.858114 |
| <i>Esp16</i>    | exocrine gland secreted peptide 16                                                                                                          | -1.98 | 0.035577 | 0.955604 |
| <i>Klhl13</i>   | kelch-like 13                                                                                                                               | -1.97 | 0.015337 | 0.934625 |
| <i>Cacng5</i>   | calcium channel, voltage-dependent, gamma subunit 5                                                                                         | -1.96 | 0.004805 | 0.790387 |
| <i>Cd74</i>     | CD74 antigen (invariant polypeptide of major histocompatibility complex, class II antigen-associated); microRNA 5107                        | -1.96 | 0.009662 | 0.861694 |
| <i>Sim1</i>     | single-minded homolog 1 (Drosophila)                                                                                                        | -1.94 | 0.031556 | 0.955027 |
| <i>Pld2</i>     | phospholipase D2                                                                                                                            | -1.92 | 0.003322 | 0.709391 |
| <i>Spint1</i>   | serine protease inhibitor, Kunitz type 1                                                                                                    | -1.91 | 0.003585 | 0.723699 |
| <i>Vat1</i>     | vesicle amine transport protein 1 homolog (T californica)                                                                                   | -1.9  | 0.006391 | 0.801647 |
| <i>Amotl1</i>   | angiomin-like 1                                                                                                                             | -1.89 | 0.017336 | 0.934625 |
| <i>Vmn1r91</i>  | vomer nasal 1 receptor 91                                                                                                                   | -1.89 | 0.025779 | 0.944116 |
| <i>Tmem225</i>  | transmembrane protein 225                                                                                                                   | -1.89 | 0.022016 | 0.934625 |
| <i>Ahi1</i>     | Abelson helper integration site 1                                                                                                           | -1.89 | 0.027374 | 0.944116 |
| <i>Sema5a</i>   | sema domain, seven thrombospondin repeats (type 1 and type 1-like), transmembrane domain (TM) and short cytoplasmic domain, (semaphorin) 5A | -1.88 | 0.029424 | 0.955027 |
| <i>Pigr</i>     | polymeric immunoglobulin receptor                                                                                                           | -1.87 | 0.041785 | 0.955604 |
| <i>Elfn1</i>    | leucine rich repeat and fibronectin type III, extracellular 1                                                                               | -1.87 | 0.006022 | 0.801647 |
| <i>Ccdc187</i>  | coiled-coil domain containing 187                                                                                                           | -1.86 | 0.009178 | 0.858114 |
| <i>Sema6d</i>   | sema domain, transmembrane domain (TM), and cytoplasmic domain, (semaphorin) 6D                                                             | -1.83 | 0.004517 | 0.789838 |
| <i>Tpm2</i>     | tropomyosin 2, beta                                                                                                                         | -1.82 | 0.018177 | 0.934625 |
| <i>Sfmbt2</i>   | Scm-like with four mbt domains 2                                                                                                            | -1.82 | 0.007206 | 0.828491 |
| <i>Vwa5b1</i>   | von Willebrand factor A domain containing 5B1                                                                                               | -1.79 | 0.005162 | 0.801598 |
| <i>Cfap46</i>   | cilia and flagella associated protein 46                                                                                                    | -1.78 | 0.0369   | 0.955604 |
| <i>Kazn</i>     | kazrin, periplakin interacting protein                                                                                                      | -1.77 | 0.023045 | 0.934625 |
| <i>Ache</i>     | acetylcholinesterase                                                                                                                        | -1.77 | 0.034447 | 0.955604 |
| <i>Olfir860</i> | olfactory receptor 860                                                                                                                      | -1.77 | 0.036863 | 0.955604 |
| <i>Slc1a7</i>   | solute carrier family 1 (glutamate transporter), member 7                                                                                   | -1.77 | 0.01115  | 0.872249 |
| <i>Pram1</i>    | PML-RAR alpha-regulated adaptor molecule 1                                                                                                  | -1.77 | 0.034638 | 0.955604 |



|                 |                                                                              |       |          |          |
|-----------------|------------------------------------------------------------------------------|-------|----------|----------|
| <i>Cyp2j8</i>   | cytochrome P450, family 2, subfamily j, polypeptide 8                        | -1.76 | 0.011447 | 0.882631 |
| <i>Pnma5</i>    | paraneoplastic antigen family 5                                              | -1.76 | 0.000336 | 0.503007 |
| <i>Peg3</i>     | paternally expressed 3                                                       | -1.76 | 0.010784 | 0.872249 |
| <i>Plekhh2</i>  | pleckstrin homology domain containing, family H (with MyTH4 domain) member 2 | -1.75 | 0.012565 | 0.905716 |
| <i>Tsen15</i>   | tRNA splicing endonuclease 15 homolog (S. cerevisiae)                        | -1.75 | 0.032645 | 0.955027 |
| <i>Tmem130</i>  | transmembrane protein 130                                                    | -1.75 | 0.03258  | 0.955027 |
| <i>Ms4a3</i>    | membrane-spanning 4-domains, subfamily A, member 3                           | -1.74 | 0.049734 | 0.955604 |
| <i>Ucn3</i>     | urocortin 3                                                                  | -1.74 | 0.002235 | 0.661654 |
| <i>Fam65c</i>   | family with sequence similarity 65, member C                                 | -1.73 | 0.007245 | 0.828491 |
| <i>Olfir68</i>  | olfactory receptor 68                                                        | -1.72 | 0.042977 | 0.955604 |
| <i>Arl14epl</i> | ADP-ribosylation factor-like 14 effector protein-like                        | -1.72 | 0.04912  | 0.955604 |
| <i>Chodl</i>    | chondrolectin                                                                | -1.72 | 0.029068 | 0.955027 |
| <i>Inpp4b</i>   | inositol polyphosphate-4-phosphatase, type II                                | -1.72 | 0.007369 | 0.828491 |
| <i>Rnd2</i>     | Rho family GTPase 2                                                          | -1.71 | 0.00008  | 0.503007 |
| <i>Zfp936</i>   | zinc finger protein 936                                                      | -1.71 | 0.013784 | 0.925423 |
| <i>Tppp3</i>    | tubulin polymerization-promoting protein family member 3                     | -1.71 | 0.041242 | 0.955604 |
| <i>Dhtkd1</i>   | dehydrogenase E1 and transketolase domain containing 1                       | -1.71 | 0.019251 | 0.934625 |
| <i>Mroh3</i>    | maestro heat-like repeat family member 3                                     | -1.71 | 0.000903 | 0.608562 |
| <i>Tdrd5</i>    | tudor domain containing 5                                                    | -1.71 | 0.042629 | 0.955604 |
| <i>Bcam</i>     | basal cell adhesion molecule                                                 | -1.7  | 0.037585 | 0.955604 |
| <i>Nhs</i>      | Nance-Horan syndrome (human)                                                 | -1.7  | 0.023486 | 0.934625 |
| <i>Parvb</i>    | parvin, beta                                                                 | -1.7  | 0.001496 | 0.661654 |
| <i>Entpd2</i>   | ectonucleoside triphosphate diphosphohydrolase 2                             | -1.69 | 0.031004 | 0.955027 |
| <i>C1q1</i>     | complement component 1, q subcomponent-like 1                                | -1.69 | 0.010977 | 0.872249 |
| <i>Skint7</i>   | selection and upkeep of intraepithelial T cells 7                            | -1.68 | 0.022149 | 0.934625 |
| <i>Cma2</i>     | chymase 2, mast cell                                                         | -1.68 | 0.039506 | 0.955604 |
| <i>Pcdh18</i>   | protocadherin 18                                                             | -1.68 | 0.005628 | 0.801647 |
| <i>Kcnk9</i>    | potassium channel, subfamily K, member 9                                     | -1.68 | 0.022756 | 0.934625 |
| <i>Dner</i>     | delta/notch-like EGF repeat containing                                       | -1.68 | 0.001546 | 0.661654 |
| <i>Gulp1</i>    | GULP, engulfment adaptor PTB domain containing 1                             | -1.67 | 0.004517 | 0.789838 |
| <i>Fam124a</i>  | family with sequence similarity 124, member A                                | -1.67 | 0.011399 | 0.881988 |

|                 |                                                              |       |          |          |
|-----------------|--------------------------------------------------------------|-------|----------|----------|
| <i>Hap1</i>     | huntingtin-associated protein 1                              | -1.67 | 0.04034  | 0.955604 |
| <i>Pgr15l</i>   | G protein-coupled receptor 15-like                           | -1.66 | 0.03502  | 0.955604 |
| <i>Allc</i>     | allantoicase                                                 | -1.65 | 0.021126 | 0.934625 |
| <i>Siah2</i>    | seven in absentia 2                                          | -1.64 | 0.045714 | 0.955604 |
| <i>Hspb6</i>    | heat shock protein, alpha-crystallin-related, B6             | -1.64 | 0.019664 | 0.934625 |
| <i>Rad1</i>     | RAD1 checkpoint DNA exonuclease                              | -1.64 | 0.008452 | 0.857703 |
| <i>Limd2</i>    | LIM domain containing 2                                      | -1.64 | 0.048428 | 0.955604 |
| <i>Pid1</i>     | phosphotyrosine interaction domain containing 1              | -1.64 | 0.016404 | 0.934625 |
| <i>Vwc2</i>     | von Willebrand factor C domain containing 2                  | -1.64 | 0.023658 | 0.934625 |
| <i>Stfa3</i>    | stefin A3                                                    | -1.63 | 0.009248 | 0.858114 |
| <i>Arhgap24</i> | Rho GTPase activating protein 24                             | -1.63 | 0.018236 | 0.934625 |
| <i>Nphp3</i>    | nephronophthisis 3 (adolescent)                              | -1.63 | 0.033357 | 0.955444 |
| <i>Pipox</i>    | pipecolic acid oxidase                                       | -1.62 | 0.021037 | 0.934625 |
| <i>Esp3</i>     | exocrine gland secreted peptide 3                            | -1.62 | 0.046042 | 0.955604 |
| <i>Atp6v1c2</i> | ATPase, H <sup>+</sup> transporting, lysosomal V1 subunit C2 | -1.62 | 0.001657 | 0.661654 |
| <i>Cfap70</i>   | cilia and flagella associated protein 70                     | -1.62 | 0.006939 | 0.828465 |
| <i>Sncaip</i>   | synuclein, alpha interacting protein (synphilin)             | -1.61 | 0.032538 | 0.955027 |
| <i>Lmnb2</i>    | lamin B2                                                     | -1.61 | 0.000556 | 0.56096  |
| <i>Cks1b</i>    | CDC28 protein kinase 1b                                      | -1.61 | 0.030297 | 0.955027 |
| <i>Mrc2</i>     | mannose receptor, C type 2                                   | -1.61 | 0.038925 | 0.955604 |
| <i>Mical2</i>   | MICAL-like 2                                                 | -1.61 | 0.027435 | 0.944116 |
| <i>L3mbtl4</i>  | l(3)mbt-like 4 (Drosophila)                                  | -1.61 | 0.022586 | 0.934625 |
| <i>Paqr6</i>    | progesterin and adipoQ receptor family member VI             | -1.61 | 0.035822 | 0.955604 |
| <i>Ubap1l</i>   | ubiquitin-associated protein 1-like                          | -1.6  | 0.009542 | 0.858339 |
| <i>Slitrk6</i>  | SLIT and NTRK-like family, member 6                          | -1.59 | 0.030942 | 0.955027 |
| <i>Papolb</i>   | poly (A) polymerase beta (testis specific)                   | -1.59 | 0.0165   | 0.934625 |
| <i>Tlr1</i>     | toll-like receptor 1                                         | -1.58 | 0.000354 | 0.503007 |
| <i>Crisp4</i>   | cysteine-rich secretory protein 4                            | -1.58 | 0.040169 | 0.955604 |
| <i>Tgtp2</i>    | T cell specific GTPase 2                                     | -1.58 | 0.023125 | 0.934625 |
| <i>Nrsn2</i>    | neurensin 2                                                  | -1.57 | 0.006496 | 0.801647 |
| <i>Cep57</i>    | centrosomal protein 57                                       | -1.57 | 0.039641 | 0.955604 |
| <i>Vmn1r103</i> | vomeroneasal 1 receptor 103                                  | -1.57 | 0.011975 | 0.894062 |
| <i>Fads2</i>    | fatty acid desaturase 2                                      | -1.57 | 0.015907 | 0.934625 |
| <i>Fndc3b</i>   | fibronectin type III domain containing 3B                    | -1.56 | 0.000668 | 0.608562 |
| <i>Cdhr1</i>    | cadherin-related family member 1                             | -1.56 | 0.023308 | 0.934625 |
| <i>Amot</i>     | angiominin                                                   | -1.56 | 0.002648 | 0.690171 |
| <i>Sorcs2</i>   | sortilin-related VPS10 domain containing receptor 2          | -1.55 | 0.010285 | 0.872249 |
| <i>Col6a4</i>   | collagen, type VI, alpha 4                                   | -1.55 | 0.018922 | 0.934625 |
| <i>Scd1</i>     | stearoyl-Coenzyme A desaturase 1                             | -1.55 | 0.022623 | 0.934625 |

|                 |                                                                    |       |          |          |
|-----------------|--------------------------------------------------------------------|-------|----------|----------|
| <i>Fcgr2b</i>   | Fc receptor, IgG, low affinity IIb                                 | -1.55 | 0.009651 | 0.861694 |
| <i>Scamp3</i>   | secretory carrier membrane protein 3                               | -1.54 | 0.013577 | 0.925423 |
| <i>Olf1234</i>  | olfactory receptor 1234                                            | -1.54 | 0.004268 | 0.770544 |
| <i>Cfap46</i>   | cilia and flagella associated protein 46                           | -1.54 | 0.047781 | 0.955604 |
| <i>Prame</i>    | preferentially expressed antigen in melanoma                       | -1.54 | 0.010443 | 0.872249 |
| <i>Prok2</i>    | prokineticin 2                                                     | -1.54 | 0.049644 | 0.955604 |
| <i>Amer3</i>    | APC membrane recruitment 3                                         | -1.54 | 0.014366 | 0.934625 |
| <i>Brinp2</i>   | bone morphogenic protein/retinoic acid inducible neural-specific 2 | -1.54 | 0.039266 | 0.955604 |
| <i>Slc25a42</i> | solute carrier family 25, member 42                                | -1.53 | 0.047077 | 0.955604 |
| <i>Evl</i>      | Ena-vasodilator stimulated phosphoprotein                          | -1.53 | 0.002365 | 0.690171 |
| <i>Pla2g2c</i>  | phospholipase A2, group IIC                                        | -1.53 | 0.02002  | 0.934625 |
| <i>Irf1</i>     | interferon regulatory factor 1                                     | -1.53 | 0.032034 | 0.955027 |
| <i>Col18a1</i>  | collagen, type XVIII, alpha 1                                      | -1.53 | 0.047269 | 0.955604 |
| <i>Col25a1</i>  | collagen, type XXV, alpha 1                                        | -1.53 | 0.033095 | 0.955027 |
| <i>Ece2</i>     | endothelin converting enzyme 2                                     | -1.53 | 0.031838 | 0.955027 |
| <i>Cdnf</i>     | cerebral dopamine neurotrophic factor                              | -1.52 | 0.045804 | 0.955604 |
| <i>Stpg1</i>    | sperm tail PG rich repeat containing 1                             | -1.52 | 0.034065 | 0.955604 |
| <i>Col19a1</i>  | collagen, type XIX, alpha 1                                        | -1.52 | 0.005896 | 0.801647 |
| <i>Smok3c</i>   | sperm motility kinase 3C                                           | -1.52 | 0.009772 | 0.865989 |
| <i>Gdnf</i>     | glial cell line derived neurotrophic factor                        | -1.51 | 0.043704 | 0.955604 |
| <i>Tshz1</i>    | teashirt zinc finger family member 1                               | -1.51 | 0.011132 | 0.872249 |
| <i>Dgat2l6</i>  | diacylglycerol O-acyltransferase 2-like 6                          | -1.51 | 0.004168 | 0.770544 |
| <i>Hpd</i>      | 4-hydroxyphenylpyruvic acid dioxygenase                            | -1.5  | 0.006658 | 0.807179 |
| <i>Caprin2</i>  | caprin family member 2                                             | -1.5  | 0.017643 | 0.934625 |
| <i>Rd3l</i>     | retinal degeneration 3-like                                        | -1.5  | 0.022431 | 0.934625 |
| <i>Gnai2</i>    | guanine nucleotide binding protein (G protein), alpha inhibiting 2 | -1.5  | 0.016568 | 0.934625 |
| <i>Adgrg1</i>   | adhesion G protein-coupled receptor G1                             | -1.5  | 0.036435 | 0.955604 |
| <i>Cdh22</i>    | cadherin 22                                                        | -1.5  | 0.015997 | 0.934625 |
| <i>Adra1a</i>   | adrenergic receptor, alpha 1a                                      | -1.5  | 0.028121 | 0.945337 |
| <i>Adarb2</i>   | adenosine deaminase, RNA-specific, B2                              | -1.5  | 0.023683 | 0.934625 |
| <i>Olf1845</i>  | olfactory receptor 845                                             | -1.49 | 0.038276 | 0.955604 |
| <i>Mfap2</i>    | microfibrillar-associated protein 2                                | -1.49 | 0.029352 | 0.955027 |
| <i>Dclk3</i>    | doublecortin-like kinase 3                                         | -1.48 | 0.031212 | 0.955027 |
| <i>Ttc16</i>    | tetratricopeptide repeat domain 16                                 | -1.48 | 0.014312 | 0.934625 |
| <i>Ncapg</i>    | non-SMC condensin I complex, subunit G                             | -1.48 | 0.045968 | 0.955604 |
| <i>Syk</i>      | spleen tyrosine kinase                                             | -1.48 | 0.000338 | 0.503007 |
| <i>Vat1l</i>    | vesicle amine transport protein 1 homolog-like (T. californica)    | -1.47 | 0.011219 | 0.872249 |
| <i>Zfp442</i>   | zinc finger protein 442                                            | -1.47 | 0.010355 | 0.872249 |
| <i>Stox2</i>    | storkhead box 2                                                    | -1.47 | 0.00597  | 0.801647 |
| <i>Ribc1</i>    | RIB43A domain with coiled-coils 1                                  | -1.47 | 0.037304 | 0.955604 |
| <i>Glpr1l2</i>  | GLI pathogenesis-related 1 like 2                                  | -1.47 | 0.022137 | 0.934625 |

|                 |                                                        |       |          |          |
|-----------------|--------------------------------------------------------|-------|----------|----------|
| <i>Rhox2c</i>   | reproductive homeobox 2C                               | -1.47 | 0.040228 | 0.955604 |
| <i>Vmn1r216</i> | vomeronasal 1 receptor 216                             | -1.47 | 0.031789 | 0.955027 |
| <i>Tectb</i>    | tectorin beta; microRNA 6715                           | -1.47 | 0.004775 | 0.790387 |
| <i>Gipc2</i>    | GIPC PDZ domain containing family, member 2            | -1.46 | 0.039032 | 0.955604 |
| <i>Pou2f1</i>   | POU domain, class 2, transcription factor 1            | -1.46 | 0.032228 | 0.955027 |
| <i>Zbtb12</i>   | zinc finger and BTB domain containing 12               | -1.46 | 0.015423 | 0.934625 |
| <i>Clmp</i>     | CXADR-like membrane protein                            | -1.46 | 0.043335 | 0.955604 |
| <i>Gap43</i>    | growth associated protein 43                           | -1.46 | 0.011081 | 0.872249 |
| <i>Nrip2</i>    | nuclear receptor interacting protein 2                 | -1.46 | 0.018738 | 0.934625 |
| <i>Orai2</i>    | ORAI calcium release-activated calcium modulator 2     | -1.45 | 0.035087 | 0.955604 |
| <i>Scn11a</i>   | sodium channel, voltage-gated, type XI, alpha          | -1.45 | 0.017703 | 0.934625 |
| <i>Mab21l1</i>  | mab-21-like 1 (C. elegans)                             | -1.45 | 0.027309 | 0.944116 |
| <i>Casq2</i>    | calsequestrin 2                                        | -1.44 | 0.046323 | 0.955604 |
| <i>Vmn1r113</i> | vomeronasal 1 receptor 113                             | -1.44 | 0.018143 | 0.934625 |
| <i>Olfr1218</i> | olfactory receptor 1218                                | -1.44 | 0.01809  | 0.934625 |
| <i>Elmo3</i>    | engulfment and cell motility 3                         | -1.44 | 0.005495 | 0.801647 |
| <i>Fam229b</i>  | family with sequence similarity 229, member B          | -1.44 | 0.000331 | 0.503007 |
| <i>Cyp3a16</i>  | cytochrome P450, family 3, subfamily a, polypeptide 16 | -1.44 | 0.038418 | 0.955604 |
| <i>Mcpt2</i>    | mast cell protease 2                                   | -1.44 | 0.037435 | 0.955604 |
| <i>Ep300</i>    | E1A binding protein p300                               | -1.44 | 0.015313 | 0.934625 |
| <i>Tsen2</i>    | tRNA splicing endonuclease 2 homolog (S. cerevisiae)   | -1.43 | 0.033196 | 0.955027 |
| <i>Mdk</i>      | midkine                                                | -1.43 | 0.039777 | 0.955604 |
| <i>Olfr164</i>  | olfactory receptor 164                                 | -1.43 | 0.01313  | 0.919747 |
| <i>Arsk</i>     | arylsulfatase K                                        | -1.43 | 0.009547 | 0.858339 |
| <i>Ptprc</i>    | protein tyrosine phosphatase, receptor type, C         | -1.43 | 0.045495 | 0.955604 |
| <i>Bpifa3</i>   | BPI fold containing family A, member 3                 | -1.43 | 0.011066 | 0.872249 |
| <i>Ccdc137</i>  | coiled-coil domain containing 137                      | -1.43 | 0.029272 | 0.955027 |
| <i>Efcab12</i>  | EF-hand calcium binding domain 12                      | -1.43 | 0.025704 | 0.944116 |
| <i>Olfr1200</i> | olfactory receptor 1200                                | -1.43 | 0.01779  | 0.934625 |
| <i>Olfr153</i>  | olfactory receptor 153                                 | -1.43 | 0.038291 | 0.955604 |
| <i>Ccdc183</i>  | coiled-coil domain containing 183                      | -1.43 | 0.007965 | 0.844445 |
| <i>Efs</i>      | embryonal Fyn-associated substrate                     | -1.43 | 0.002659 | 0.690171 |
| <i>Mrap2</i>    | melanocortin 2 receptor accessory protein 2            | -1.43 | 0.02639  | 0.944116 |
| <i>Oprm1</i>    | opioid receptor, mu 1                                  | -1.42 | 0.037715 | 0.955604 |
| <i>Olfr374</i>  | olfactory receptor 374                                 | -1.42 | 0.047621 | 0.955604 |
| <i>Zfp341</i>   | zinc finger protein 341                                | -1.42 | 0.024528 | 0.934625 |
| <i>Epcam</i>    | epithelial cell adhesion molecule                      | -1.42 | 0.027384 | 0.944116 |

|                  |                                                                             |       |          |          |
|------------------|-----------------------------------------------------------------------------|-------|----------|----------|
| <i>Rsg1</i>      | REM2 and RAB-like small GTPase 1                                            | -1.42 | 0.00081  | 0.608562 |
| <i>Npffr1</i>    | neuropeptide FF receptor 1                                                  | -1.42 | 0.016503 | 0.934625 |
| <i>Pla2g16</i>   | phospholipase A2, group XVI                                                 | -1.41 | 0.024733 | 0.937233 |
| <i>Zfp937</i>    | zinc finger protein 937                                                     | -1.41 | 0.008062 | 0.844445 |
| <i>Hip1</i>      | huntingtin interacting protein 1                                            | -1.41 | 0.046334 | 0.955604 |
| <i>Rin2</i>      | Ras and Rab interactor 2                                                    | -1.41 | 0.03863  | 0.955604 |
| <i>Izumo1r</i>   | IZUMO1 receptor, JUNO                                                       | -1.41 | 0.016565 | 0.934625 |
| <i>Gstm3</i>     | glutathione S-transferase, mu 3                                             | -1.41 | 0.04015  | 0.955604 |
| <i>Olf814</i>    | olfactory receptor 814                                                      | -1.41 | 0.037276 | 0.955604 |
| <i>Mmp12</i>     | matrix metalloproteinase 12                                                 | -1.41 | 0.034378 | 0.955604 |
| <i>Aurka</i>     | aurora kinase A                                                             | -1.41 | 0.027252 | 0.944116 |
| <i>Sncg</i>      | synuclein, gamma                                                            | -1.41 | 0.044689 | 0.955604 |
| <i>H2-Aa</i>     | histocompatibility 2, class II antigen A, alpha                             | -1.41 | 0.030425 | 0.955027 |
| <i>Sfrp4</i>     | secreted frizzled-related protein 4                                         | -1.41 | 0.030542 | 0.955027 |
| <i>Psd2</i>      | pleckstrin and Sec7 domain containing 2                                     | -1.41 | 0.006688 | 0.807179 |
| <i>Zfp516</i>    | zinc finger protein 516                                                     | -1.4  | 0.022412 | 0.934625 |
| <i>Fam196b</i>   | family with sequence similarity 196, member B                               | -1.4  | 0.003395 | 0.711257 |
| <i>Krtap31-1</i> | keratin associated protein 31-1                                             | -1.4  | 0.033211 | 0.955027 |
| <i>Tcf7l1</i>    | transcription factor 7 like 1 (T cell specific, HMG box)                    | -1.4  | 0.010833 | 0.872249 |
| <i>Olf516</i>    | olfactory receptor 516                                                      | -1.4  | 0.006067 | 0.801647 |
| <i>Igdcc4</i>    | immunoglobulin superfamily, DCC subclass, member 4                          | -1.4  | 0.032276 | 0.955027 |
| <i>Rybp</i>      | RING1 and YY1 binding protein                                               | -1.4  | 0.04217  | 0.955604 |
| <i>Atn1</i>      | atrophin 1                                                                  | -1.4  | 0.017392 | 0.934625 |
| <i>Itgb4</i>     | integrin beta 4                                                             | -1.39 | 0.019884 | 0.934625 |
| <i>Arhgap27</i>  | Rho GTPase activating protein 27                                            | -1.39 | 0.011998 | 0.894062 |
| <i>Ier5l</i>     | immediate early response 5-like                                             | -1.39 | 0.025274 | 0.939355 |
| <i>Iqce</i>      | IQ motif containing E                                                       | -1.39 | 0.004635 | 0.790387 |
| <i>Olf1340</i>   | olfactory receptor 1340                                                     | -1.39 | 0.033774 | 0.955604 |
| <i>Cyp27b1</i>   | cytochrome P450, family 27, subfamily b, polypeptide 1                      | -1.39 | 0.039124 | 0.955604 |
| <i>Zfp811</i>    | zinc finger protein 811                                                     | -1.39 | 0.029228 | 0.955027 |
| <i>Zfp354b</i>   | zinc finger protein 354B                                                    | -1.39 | 0.01497  | 0.934625 |
| <i>Nap1l5</i>    | nucleosome assembly protein 1-like 5                                        | -1.39 | 0.047608 | 0.955604 |
| <i>Farp1</i>     | FERM, RhoGEF (Arhgef) and pleckstrin domain protein 1 (chondrocyte-derived) | -1.39 | 0.049962 | 0.955604 |
| <i>Nt5c1b</i>    | 5-nucleotidase, cytosolic IB; 5'-nucleotidase, cytosolic IB                 | -1.38 | 0.010269 | 0.872249 |
| <i>Il21</i>      | interleukin 21                                                              | -1.38 | 0.003959 | 0.761359 |
| <i>Scgn</i>      | secretagogin, EF-hand calcium binding protein                               | -1.38 | 0.048697 | 0.955604 |
| <i>Dppa5a</i>    | developmental pluripotency associated 5A                                    | -1.38 | 0.01784  | 0.934625 |

|                |                                                                                        |       |          |          |
|----------------|----------------------------------------------------------------------------------------|-------|----------|----------|
| <i>Gpr141</i>  | G protein-coupled receptor 141                                                         | -1.38 | 0.034576 | 0.955604 |
| <i>Tmem206</i> | transmembrane protein 206                                                              | -1.38 | 0.01693  | 0.934625 |
| <i>Pldi</i>    | polymorphic derived intron containing                                                  | -1.38 | 0.002032 | 0.661654 |
| <i>Rnpc3</i>   | RNA-binding region (RNP1, RRM) containing 3                                            | -1.38 | 0.002164 | 0.661654 |
| <i>Mtss1l</i>  | metastasis suppressor 1-like                                                           | -1.38 | 0.030275 | 0.955027 |
| <i>Pnmal2</i>  | PNMA-like 2                                                                            | -1.38 | 0.017846 | 0.934625 |
| <i>Asic2</i>   | acid-sensing (proton-gated) ion channel 2                                              | -1.38 | 0.022815 | 0.934625 |
| <i>Zfx3</i>    | zinc finger homeobox 3                                                                 | -1.37 | 0.036763 | 0.955604 |
| <i>Tcf7l2</i>  | transcription factor 7 like 2, T cell specific, HMG box                                | -1.37 | 0.037554 | 0.955604 |
| <i>Rnpepl1</i> | arginyl aminopeptidase (aminopeptidase B)-like 1                                       | -1.37 | 0.043346 | 0.955604 |
| <i>Itga11</i>  | integrin alpha 11                                                                      | -1.37 | 0.048379 | 0.955604 |
| <i>Ltb4r2</i>  | leukotriene B4 receptor 2                                                              | -1.37 | 0.002567 | 0.690171 |
| <i>Vax2</i>    | ventral anterior homeobox 2                                                            | -1.37 | 0.000031 | 0.503007 |
| <i>Rpl21</i>   | ribosomal protein L21                                                                  | -1.37 | 0.016549 | 0.934625 |
| <i>Klf12</i>   | Kruppel-like factor 12                                                                 | -1.37 | 0.000282 | 0.503007 |
| <i>Pitpnc1</i> | phosphatidylinositol transfer protein, cytoplasmic 1                                   | -1.36 | 0.030752 | 0.955027 |
| <i>Vezf1</i>   | vascular endothelial zinc finger 1                                                     | -1.36 | 0.003145 | 0.699764 |
| <i>Hipk3</i>   | homeodomain interacting protein kinase 3; microRNA 1902                                | -1.36 | 0.017022 | 0.934625 |
| <i>Olf1232</i> | olfactory receptor 1232                                                                | -1.36 | 0.038101 | 0.955604 |
| <i>Slc6a5</i>  | solute carrier family 6 (neurotransmitter transporter, glycine), member 5              | -1.36 | 0.049366 | 0.955604 |
| <i>Lcn11</i>   | lipocalin 11                                                                           | -1.36 | 0.03879  | 0.955604 |
| <i>Aldh3b2</i> | aldehyde dehydrogenase 3 family, member B2                                             | -1.36 | 0.024314 | 0.934625 |
| <i>Sema3f</i>  | sema domain, immunoglobulin domain (Ig), short basic domain, secreted, (semaphorin) 3F | -1.35 | 0.049001 | 0.955604 |
| <i>Synb</i>    | syncytin b                                                                             | -1.35 | 0.041279 | 0.955604 |
| <i>Synb</i>    | syncytin b                                                                             | -1.35 | 0.041279 | 0.955604 |
| <i>Frem3</i>   | Fras1 related extracellular matrix protein 3                                           | -1.35 | 0.01005  | 0.871773 |
| <i>Olf231</i>  | olfactory receptor 231                                                                 | -1.35 | 0.00914  | 0.858114 |
| <i>Olf1450</i> | olfactory receptor 1450                                                                | -1.35 | 0.033288 | 0.955027 |
| <i>Cfi</i>     | complement component factor i                                                          | -1.35 | 0.032091 | 0.955027 |
| <i>Zbed4</i>   | zinc finger, BED type containing 4                                                     | -1.35 | 0.049185 | 0.955604 |
| <i>Spaca4</i>  | sperm acrosome associated 4                                                            | -1.35 | 0.008994 | 0.858114 |
| <i>Mfsd7b</i>  | major facilitator superfamily domain containing 7B                                     | -1.35 | 0.019428 | 0.934625 |
| <i>Grik1</i>   | glutamate receptor, ionotropic, kainate 1                                              | -1.35 | 0.047299 | 0.955604 |
| <i>Por</i>     | P450 (cytochrome) oxidoreductase                                                       | -1.34 | 0.027729 | 0.945337 |
| <i>Arhgap8</i> | Rho GTPase activating protein 8                                                        | -1.34 | 0.001503 | 0.661654 |

|                 |                                                                                                                  |       |          |          |
|-----------------|------------------------------------------------------------------------------------------------------------------|-------|----------|----------|
| <i>Zfp873</i>   | zinc finger protein 873                                                                                          | -1.34 | 0.023318 | 0.934625 |
| <i>Cd48</i>     | CD48 antigen                                                                                                     | -1.34 | 0.04339  | 0.955604 |
| <i>Nup210</i>   | nucleoporin 210                                                                                                  | -1.34 | 0.016843 | 0.934625 |
| <i>Sema4b</i>   | sema domain, immunoglobulin domain (Ig), transmembrane domain (TM) and short cytoplasmic domain, (semaphorin) 4B | -1.34 | 0.024443 | 0.934625 |
| <i>Podxl2</i>   | podocalyxin-like 2                                                                                               | -1.34 | 0.048941 | 0.955604 |
| <i>Hdac11</i>   | histone deacetylase 11                                                                                           | -1.34 | 0.047501 | 0.955604 |
| <i>Rab12</i>    | RAB12, member RAS oncogene family                                                                                | -1.34 | 0.005433 | 0.801647 |
| <i>Sgcd</i>     | sarcoglycan, delta (dystrophin-associated glycoprotein)                                                          | -1.34 | 0.013959 | 0.930836 |
| <i>Ifnl3</i>    | interferon lambda 3                                                                                              | -1.33 | 0.028051 | 0.945337 |
| <i>Tmem182</i>  | transmembrane protein 182                                                                                        | -1.33 | 0.049116 | 0.955604 |
| <i>Shisa3</i>   | shisa family member 3                                                                                            | -1.33 | 0.039074 | 0.955604 |
| <i>Ttc24</i>    | tetratricopeptide repeat domain 24                                                                               | -1.33 | 0.020407 | 0.934625 |
| <i>Dynap</i>    | dynactin associated protein                                                                                      | -1.33 | 0.032087 | 0.955027 |
| <i>Pp2d1</i>    | protein phosphatase 2C-like domain containing 1                                                                  | -1.33 | 0.017865 | 0.934625 |
| <i>Klhl40</i>   | kelch-like 40                                                                                                    | -1.33 | 0.023689 | 0.934625 |
| <i>H2-Q1</i>    | histocompatibility 2, Q region locus 1                                                                           | -1.33 | 0.015651 | 0.934625 |
| <i>Snta1</i>    | syntrophin, acidic 1                                                                                             | -1.33 | 0.010579 | 0.872249 |
| <i>Ceacam11</i> | carcinoembryonic antigen-related cell adhesion molecule 11                                                       | -1.33 | 0.047721 | 0.955604 |
| <i>Zbtb7c</i>   | zinc finger and BTB domain containing 7C                                                                         | -1.33 | 0.045802 | 0.955604 |
| <i>Slc38a10</i> | solute carrier family 38, member 10                                                                              | -1.32 | 0.007439 | 0.828491 |
| <i>Gpr179</i>   | G protein-coupled receptor 179                                                                                   | -1.32 | 0.012394 | 0.902392 |
| <i>Mns1</i>     | meiosis-specific nuclear structural protein 1                                                                    | -1.32 | 0.029676 | 0.955027 |
| <i>Olfir832</i> | olfactory receptor 832                                                                                           | -1.32 | 0.001153 | 0.661654 |
| <i>Draxin</i>   | dorsal inhibitory axon guidance protein                                                                          | -1.32 | 0.026374 | 0.944116 |
| <i>Zbtb7b</i>   | zinc finger and BTB domain containing 7B                                                                         | -1.32 | 0.009341 | 0.858114 |
| <i>Ssmem1</i>   | serine-rich single-pass membrane protein 1                                                                       | -1.32 | 0.010735 | 0.872249 |
| <i>Sfrp5</i>    | secreted frizzled-related sequence protein 5                                                                     | -1.32 | 0.045386 | 0.955604 |
| <i>Prps111</i>  | phosphoribosyl pyrophosphate synthetase 1-like 1                                                                 | -1.32 | 0.032269 | 0.955027 |
| <i>AF067061</i> | cDNA sequence AF067061                                                                                           | -1.32 | 0.02398  | 0.934625 |
| <i>Pgpep1l</i>  | pyroglutamyl-peptidase I-like                                                                                    | -1.32 | 0.003314 | 0.709391 |
| <i>Hoxa2</i>    | homeobox A2                                                                                                      | -1.32 | 0.019874 | 0.934625 |
| <i>Gnas</i>     | GNAS (guanine nucleotide binding protein, alpha stimulating) complex locus                                       | -1.32 | 0.045989 | 0.955604 |
| <i>Klhl15</i>   | kelch-like 15; microRNA 7673                                                                                     | -1.31 | 0.036483 | 0.955604 |
| <i>Reep4</i>    | receptor accessory protein 4                                                                                     | -1.31 | 0.024024 | 0.934625 |
| <i>Prap1</i>    | proline-rich acidic protein 1                                                                                    | -1.31 | 0.018151 | 0.934625 |

|                 |                                                                                   |       |          |          |
|-----------------|-----------------------------------------------------------------------------------|-------|----------|----------|
| <i>H2-L</i>     | histocompatibility 2, D region locus L;<br>histocompatibility 2, D region locus 1 | -1.31 | 0.005876 | 0.801647 |
| <i>Olf811</i>   | olfactory receptor 811                                                            | -1.31 | 0.035491 | 0.955604 |
| <i>Vac14</i>    | Vac14 homolog ( <i>S. cerevisiae</i> )                                            | -1.31 | 0.03393  | 0.955604 |
| <i>Adck4</i>    | aarF domain containing kinase 4                                                   | -1.31 | 0.02655  | 0.944116 |
| <i>Ins1</i>     | insulin I                                                                         | -1.31 | 0.018948 | 0.934625 |
| <i>Chic1</i>    | cysteine-rich hydrophobic domain 1                                                | -1.31 | 0.000321 | 0.503007 |
| <i>Asgr1</i>    | asialoglycoprotein receptor 1                                                     | -1.31 | 0.00219  | 0.661654 |
| <i>Mtss1</i>    | metastasis suppressor 1                                                           | -1.31 | 0.019795 | 0.934625 |
| <i>Elfn2</i>    | leucine rich repeat and fibronectin type<br>III, extracellular 2                  | -1.31 | 0.040763 | 0.955604 |
| <i>Faim2</i>    | Fas apoptotic inhibitory molecule 2                                               | -1.31 | 0.04301  | 0.955604 |
| <i>Srf</i>      | serum response factor                                                             | -1.3  | 0.014575 | 0.934625 |
| <i>Klhl36</i>   | kelch-like 36                                                                     | -1.3  | 0.024538 | 0.934625 |
| <i>Lrrk1</i>    | leucine-rich repeat kinase 1                                                      | -1.3  | 0.023782 | 0.934625 |
| <i>Padi4</i>    | peptidyl arginine deiminase, type IV                                              | -1.3  | 0.018253 | 0.934625 |
| <i>Slamf1</i>   | signaling lymphocytic activation molecule<br>family member 1                      | -1.3  | 0.040678 | 0.955604 |
| <i>Fsip2</i>    | fibrous sheath-interacting protein 2                                              | -1.3  | 0.009092 | 0.858114 |
| <i>Zfp629</i>   | zinc finger protein 629                                                           | -1.3  | 0.048843 | 0.955604 |
| <i>Camkmt</i>   | calmodulin-lysine N-methyltransferase                                             | -1.3  | 0.036247 | 0.955604 |
| <i>Tas2r120</i> | taste receptor, type 2, member 120                                                | -1.3  | 0.048503 | 0.955604 |
| <i>Ddc</i>      | dopa decarboxylase                                                                | -1.3  | 0.029429 | 0.955027 |
| <i>Mob3c</i>    | MOB kinase activator 3C                                                           | -1.3  | 0.032615 | 0.955027 |
| <i>Kcnp1</i>    | Kv channel-interacting protein 1                                                  | -1.3  | 0.031587 | 0.955027 |
| <i>Ptpn13</i>   | protein tyrosine phosphatase, non-<br>receptor type 13                            | -1.29 | 0.022426 | 0.934625 |
| <i>Gtf3c1</i>   | general transcription factor III C 1                                              | -1.29 | 0.023344 | 0.934625 |
| <i>Bmper</i>    | BMP-binding endothelial regulator                                                 | -1.29 | 0.03586  | 0.955604 |
| <i>Tmem30b</i>  | transmembrane protein 30B                                                         | -1.29 | 0.000426 | 0.525984 |
| <i>Ccdc105</i>  | coiled-coil domain containing 105                                                 | -1.29 | 0.024165 | 0.934625 |
| <i>Lalba</i>    | lactalbumin, alpha                                                                | -1.29 | 0.044712 | 0.955604 |
| <i>Fchs2</i>    | FCH and double SH3 domains 2                                                      | -1.29 | 0.033451 | 0.955604 |
| <i>Chrna10</i>  | cholinergic receptor, nicotinic, alpha<br>polypeptide 10                          | -1.29 | 0.021011 | 0.934625 |
| <i>Gla4</i>     | glycine receptor, alpha 4 subunit                                                 | -1.29 | 0.023115 | 0.934625 |
| <i>Dusp4</i>    | dual specificity phosphatase 4                                                    | -1.29 | 0.01506  | 0.934625 |
| <i>Usp10</i>    | ubiquitin specific peptidase 10                                                   | -1.29 | 0.033206 | 0.955027 |
| <i>Marcks</i>   | myristoylated alanine rich protein kinase<br>C substrate                          | -1.29 | 0.022033 | 0.934625 |
| <i>Vwa3a</i>    | von Willebrand factor A domain<br>containing 3A                                   | -1.29 | 0.020979 | 0.934625 |
| <i>Dzip1l</i>   | DAZ interacting protein 1-like                                                    | -1.28 | 0.026802 | 0.944116 |
| <i>Olf934</i>   | olfactory receptor 934                                                            | -1.28 | 0.006389 | 0.801647 |
| <i>Prpsap1</i>  | phosphoribosyl pyrophosphate<br>synthetase-associated protein 1                   | -1.28 | 0.021994 | 0.934625 |



|                 |                                                                                                                                           |       |          |          |
|-----------------|-------------------------------------------------------------------------------------------------------------------------------------------|-------|----------|----------|
| <i>Tdrd12</i>   | tudor domain containing 12                                                                                                                | -1.28 | 0.010722 | 0.872249 |
| <i>Prc1</i>     | protein regulator of cytokinesis 1                                                                                                        | -1.28 | 0.033907 | 0.955604 |
| <i>Olfr1380</i> | olfactory receptor 1380                                                                                                                   | -1.28 | 0.035809 | 0.955604 |
| <i>Psg27</i>    | pregnancy-specific glycoprotein 27                                                                                                        | -1.28 | 0.001982 | 0.661654 |
| <i>A1cf</i>     | APOBEC1 complementation factor                                                                                                            | -1.28 | 0.030234 | 0.955027 |
| <i>Emc6</i>     | ER membrane protein complex subunit 6                                                                                                     | -1.28 | 0.042852 | 0.955604 |
| <i>SpdyA</i>    | speedy/RINGO cell cycle regulator family, member A; methyltransferase like 4, pseudogene 1                                                | -1.28 | 0.028395 | 0.945337 |
| <i>Slc6a9</i>   | solute carrier family 6 (neurotransmitter transporter, glycine), member 9                                                                 | -1.27 | 0.032981 | 0.955027 |
| <i>Fam90a1a</i> | family with sequence similarity 90, member A1A                                                                                            | -1.27 | 0.013645 | 0.925423 |
| <i>Tbx19</i>    | T-box 19                                                                                                                                  | -1.27 | 0.012807 | 0.905716 |
| <i>Ndufc1</i>   | NADH dehydrogenase (ubiquinone) 1, subcomplex unknown, 1                                                                                  | -1.27 | 0.002535 | 0.690171 |
| <i>Hrct1</i>    | histidine rich carboxyl terminus 1                                                                                                        | -1.27 | 0.002807 | 0.693971 |
| <i>Olfr1279</i> | olfactory receptor 1279                                                                                                                   | -1.27 | 0.046318 | 0.955604 |
| <i>Lrrc56</i>   | leucine rich repeat containing 56                                                                                                         | -1.27 | 0.041379 | 0.955604 |
| <i>Gon4l</i>    | gon-4-like (C.elegans)                                                                                                                    | -1.27 | 0.036185 | 0.955604 |
| <i>Plch1</i>    | phospholipase C, eta 1                                                                                                                    | -1.27 | 0.04408  | 0.955604 |
| <i>Myo3b</i>    | myosin IIIB                                                                                                                               | -1.26 | 0.008245 | 0.851525 |
| <i>Ptger1</i>   | prostaglandin E receptor 1 (subtype EP1)                                                                                                  | -1.26 | 0.002416 | 0.690171 |
| <i>Adcy4</i>    | adenylate cyclase 4                                                                                                                       | -1.26 | 0.001813 | 0.661654 |
| <i>Trp53bp2</i> | transformation related protein 53 binding protein 2                                                                                       | -1.26 | 0.040658 | 0.955604 |
| <i>Ghrhr</i>    | growth hormone releasing hormone receptor                                                                                                 | -1.26 | 0.036211 | 0.955604 |
| <i>Crkl</i>     | v-crk sarcoma virus CT10 oncogene homolog (avian)-like                                                                                    | -1.26 | 0.032139 | 0.955027 |
| <i>Snip1</i>    | Smad nuclear interacting protein 1                                                                                                        | -1.26 | 0.030109 | 0.955027 |
| <i>Krt35</i>    | keratin 35                                                                                                                                | -1.26 | 0.009788 | 0.865989 |
| <i>Fam179a</i>  | family with sequence similarity 179, member A                                                                                             | -1.26 | 0.041814 | 0.955604 |
| <i>Rp1l1</i>    | retinitis pigmentosa 1 homolog (human)-like 1                                                                                             | -1.26 | 0.020378 | 0.934625 |
| <i>Slc38a6</i>  | solute carrier family 38, member 6                                                                                                        | -1.26 | 0.012308 | 0.902392 |
| <i>Rsph6a</i>   | radial spoke head 6 homolog A (Chlamydomonas)                                                                                             | -1.26 | 0.027414 | 0.944116 |
| <i>Ssu2</i>     | ssu-2 homolog (C. elegans)                                                                                                                | -1.26 | 0.029301 | 0.955027 |
| <i>Rpl13a</i>   | ribosomal protein L13A; small nucleolar RNA, C/D box 32A; small nucleolar RNA, C/D box 33; small nucleolar RNA, C/D box 34; microRNA 5121 | -1.25 | 0.023794 | 0.934625 |
| <i>Hist1h4j</i> | histone cluster 1, H4j; histone cluster 1, H4m                                                                                            | -1.25 | 0.031452 | 0.955027 |

|                 |                                                                               |       |          |          |
|-----------------|-------------------------------------------------------------------------------|-------|----------|----------|
| <i>Ceacam19</i> | carcinoembryonic antigen-related cell adhesion molecule 19                    | -1.25 | 0.007265 | 0.828491 |
| <i>C2cd4d</i>   | C2 calcium-dependent domain containing 4D                                     | -1.25 | 0.021673 | 0.934625 |
| <i>Smtnl1</i>   | smoothelin-like 1                                                             | -1.25 | 0.026016 | 0.944116 |
| <i>Rbfa</i>     | ribosome binding factor A                                                     | -1.25 | 0.041975 | 0.955604 |
| <i>Olfr862</i>  | olfactory receptor 862                                                        | -1.25 | 0.042324 | 0.955604 |
| <i>Ankrd53</i>  | ankyrin repeat domain 53                                                      | -1.25 | 0.02816  | 0.945337 |
| <i>Surf6</i>    | surfeit gene 6                                                                | -1.25 | 0.039681 | 0.955604 |
| <i>lpmk</i>     | inositol polyphosphate multikinase                                            | -1.25 | 0.042258 | 0.955604 |
| <i>Gdf15</i>    | growth differentiation factor 15                                              | -1.25 | 0.006269 | 0.801647 |
| <i>Ptx3</i>     | pentraxin related gene                                                        | -1.25 | 0.00646  | 0.801647 |
| <i>Fmn2</i>     | formin 2                                                                      | -1.25 | 0.012638 | 0.905716 |
| <i>Grifin</i>   | galectin-related inter-fiber protein                                          | -1.25 | 0.039695 | 0.955604 |
| <i>Dgkd</i>     | diacylglycerol kinase, delta                                                  | -1.25 | 0.047068 | 0.955604 |
| <i>Ntrk2</i>    | neurotrophic tyrosine kinase, receptor, type 2                                | -1.25 | 0.006725 | 0.807179 |
| <i>Plekhg4</i>  | pleckstrin homology domain containing, family G (with RhoGef domain) member 4 | -1.24 | 0.023992 | 0.934625 |
| <i>Emp2</i>     | epithelial membrane protein 2                                                 | -1.24 | 0.015864 | 0.934625 |
| <i>Gnpda2</i>   | glucosamine-6-phosphate deaminase 2                                           | -1.24 | 0.038601 | 0.955604 |
| <i>Gpr27</i>    | G protein-coupled receptor 27                                                 | -1.24 | 0.009079 | 0.858114 |
| <i>Sp8</i>      | trans-acting transcription factor 8                                           | -1.24 | 0.006264 | 0.801647 |
| <i>Olfr187</i>  | olfactory receptor 187                                                        | -1.24 | 0.029812 | 0.955027 |
| <i>Arid3c</i>   | AT rich interactive domain 3C (BRIGHT-like)                                   | -1.24 | 0.048106 | 0.955604 |
| <i>Tas2r116</i> | taste receptor, type 2, member 116                                            | -1.24 | 0.044502 | 0.955604 |
| <i>Rad54l</i>   | RAD54 like ( <i>S. cerevisiae</i> )                                           | -1.24 | 0.049218 | 0.955604 |
| <i>Nkx1-2</i>   | NK1 transcription factor related, locus 2 ( <i>Drosophila</i> )               | -1.24 | 0.010714 | 0.872249 |
| <i>Atp13a3</i>  | ATPase type 13A3                                                              | -1.24 | 0.043967 | 0.955604 |
| <i>Olfr629</i>  | olfactory receptor 629                                                        | -1.24 | 0.032502 | 0.955027 |
| <i>Heph1l</i>   | hephaestin-like 1                                                             | -1.24 | 0.040275 | 0.955604 |
| <i>Gspt2</i>    | G1 to S phase transition 2                                                    | -1.24 | 0.001319 | 0.661654 |
| <i>Hspa1a</i>   | heat shock protein 1A                                                         | -1.24 | 0.037793 | 0.955604 |
| <i>Nfx1</i>     | nuclear transcription factor, X-box binding 1                                 | -1.23 | 0.047814 | 0.955604 |
| <i>Bola1</i>    | bolA-like 1 ( <i>E. coli</i> )                                                | -1.23 | 0.047973 | 0.955604 |
| <i>Ccdc70</i>   | coiled-coil domain containing 70                                              | -1.23 | 0.011098 | 0.872249 |
| <i>Utf1</i>     | undifferentiated embryonic cell transcription factor 1                        | -1.23 | 0.00421  | 0.770544 |
| <i>Tbc1d9b</i>  | TBC1 domain family, member 9B                                                 | -1.23 | 0.045131 | 0.955604 |
| <i>Olfr513</i>  | olfactory receptor 513                                                        | -1.23 | 0.01471  | 0.934625 |
| <i>Actc1</i>    | actin, alpha, cardiac muscle 1                                                | -1.23 | 0.049993 | 0.955604 |
| <i>Pramef12</i> | PRAME family member 12                                                        | -1.23 | 0.003682 | 0.724181 |
| <i>Prdm2</i>    | PR domain containing 2, with ZNF domain                                       | -1.23 | 0.029957 | 0.955027 |

|                 |                                                                  |       |          |          |
|-----------------|------------------------------------------------------------------|-------|----------|----------|
| <i>Cyp2j9</i>   | cytochrome P450, family 2, subfamily j, polypeptide 9            | -1.23 | 0.012043 | 0.89438  |
| <i>Zfp655</i>   | zinc finger protein 655                                          | -1.23 | 0.006009 | 0.801647 |
| <i>Il12b</i>    | interleukin 12b                                                  | -1.23 | 0.032637 | 0.955027 |
| <i>Cebpb</i>    | CCAAT/enhancer binding protein (C/EBP), beta                     | -1.23 | 0.030714 | 0.955027 |
| <i>B4galt6</i>  | UDP-Gal:betaGlcNAc beta 1,4-galactosyltransferase, polypeptide 6 | -1.23 | 0.033797 | 0.955604 |
| <i>Ampd3</i>    | adenosine monophosphate deaminase 3                              | -1.22 | 0.012331 | 0.902392 |
| <i>Hoxb2</i>    | homeobox B2                                                      | -1.22 | 0.045505 | 0.955604 |
| <i>Fbxw24</i>   | F-box and WD-40 domain protein 24                                | -1.22 | 0.017832 | 0.934625 |
| <i>Zbtb24</i>   | zinc finger and BTB domain containing 24                         | -1.22 | 0.012914 | 0.910345 |
| <i>Erlin2</i>   | ER lipid raft associated 2                                       | -1.22 | 0.004511 | 0.789838 |
| <i>Wnt5b</i>    | wingless-type MMTV integration site family, member 5B            | -1.22 | 0.000317 | 0.503007 |
| <i>Itpkc</i>    | inositol 1,4,5-trisphosphate 3-kinase C                          | -1.22 | 0.018493 | 0.934625 |
| <i>Fhl1</i>     | four and a half LIM domains 1                                    | -1.22 | 0.041823 | 0.955604 |
| <i>Adap2</i>    | ArfGAP with dual PH domains 2                                    | -1.21 | 0.046775 | 0.955604 |
| <i>Nr1h3</i>    | nuclear receptor subfamily 1, group H, member 3                  | -1.21 | 0.041134 | 0.955604 |
| <i>Wfdc16</i>   | WAP four-disulfide core domain 16                                | -1.21 | 0.018281 | 0.934625 |
| <i>Il31</i>     | interleukin 31                                                   | -1.21 | 0.026733 | 0.944116 |
| <i>Zmym1</i>    | zinc finger, MYM domain containing 1                             | -1.21 | 0.049047 | 0.955604 |
| <i>Crxos</i>    | cone-rod homeobox, opposite strand                               | -1.21 | 0.037794 | 0.955604 |
| <i>Rdh8</i>     | retinol dehydrogenase 8                                          | -1.21 | 0.030343 | 0.955027 |
| <i>Tph1</i>     | tryptophan hydroxylase 1                                         | -1.21 | 0.04754  | 0.955604 |
| <i>Ogfr</i>     | opioid growth factor receptor                                    | -1.2  | 0.00594  | 0.801647 |
| <i>Lpin1</i>    | lipin 1                                                          | -1.2  | 0.018951 | 0.934625 |
| <i>Cckar</i>    | cholecystokinin A receptor; U7 small nuclear RNA                 | -1.2  | 0.031366 | 0.955027 |
| <i>Tex19.2</i>  | testis expressed gene 19.2                                       | -1.2  | 0.049994 | 0.955604 |
| <i>Zmynd12</i>  | zinc finger, MYND domain containing 12                           | -1.2  | 0.049594 | 0.955604 |
| <i>Sprr2i</i>   | small proline-rich protein 2I                                    | -1.2  | 0.021898 | 0.934625 |
| <i>Rfc5</i>     | replication factor C (activator 1) 5                             | -1.2  | 0.041423 | 0.955604 |
| <i>Slfn4</i>    | schlafen 4                                                       | -1.2  | 0.034692 | 0.955604 |
| <i>Ncs1</i>     | neuronal calcium sensor 1                                        | -1.2  | 0.031834 | 0.955027 |
| <i>Ccdc74a</i>  | coiled-coil domain containing 74A                                | -1.2  | 0.012385 | 0.902392 |
| <i>Fbxl21</i>   | F-box and leucine-rich repeat protein 21                         | -1.19 | 0.037883 | 0.955604 |
| <i>Prss32</i>   | protease, serine 32                                              | -1.19 | 0.038607 | 0.955604 |
| <i>Ces1a</i>    | carboxylesterase 1A                                              | -1.19 | 0.015447 | 0.934625 |
| <i>Il21r</i>    | interleukin 21 receptor                                          | -1.18 | 0.031217 | 0.955027 |
| <i>Icam1</i>    | intercellular adhesion molecule 1                                | -1.18 | 0.018789 | 0.934625 |
| <i>AA467197</i> | expressed sequence AA467197; microRNA 147                        | -1.18 | 0.044846 | 0.955604 |
| <i>Tuba1b</i>   | tubulin, alpha 1B                                                | -1.18 | 0.01263  | 0.905716 |
| <i>Plxna3</i>   | plexin A3                                                        | -1.18 | 0.041384 | 0.955604 |

|                |                                                                      |       |          |          |
|----------------|----------------------------------------------------------------------|-------|----------|----------|
| <i>Dip2a</i>   | DIP2 disco-interacting protein 2 homolog A (Drosophila)              | -1.17 | 0.037788 | 0.955604 |
| <i>Wdfy1</i>   | WD repeat and FYVE domain containing 1                               | -1.17 | 0.026546 | 0.944116 |
| <i>Anks3</i>   | ankyrin repeat and sterile alpha motif domain containing 3           | -1.17 | 0.049633 | 0.955604 |
| <i>Clec2d</i>  | C-type lectin domain family 2, member d                              | -1.17 | 0.042588 | 0.955604 |
| <i>Cd27</i>    | CD27 antigen; microRNA 8113                                          | -1.17 | 0.047257 | 0.955604 |
| <i>Klhl32</i>  | kelch-like 32                                                        | -1.17 | 0.016188 | 0.934625 |
| <i>Map2</i>    | microtubule-associated protein 2                                     | -1.17 | 0.04964  | 0.955604 |
| <i>Ccdc106</i> | coiled-coil domain containing 106                                    | -1.16 | 0.039654 | 0.955604 |
| <i>Ccl3</i>    | chemokine (C-C motif) ligand 3                                       | -1.16 | 0.022157 | 0.934625 |
| <i>Abca7</i>   | ATP-binding cassette, sub-family A (ABC1), member 7                  | -1.16 | 0.022671 | 0.934625 |
| <i>Mfsd12</i>  | major facilitator superfamily domain containing 12                   | -1.16 | 0.020336 | 0.934625 |
| <i>Tmx4</i>    | thioredoxin-related transmembrane protein 4                          | -1.16 | 0.049171 | 0.955604 |
| <i>Wbp1l</i>   | WW domain binding protein 1 like                                     | -1.15 | 0.011713 | 0.892484 |
| <i>Lypd5</i>   | Ly6/Plaur domain containing 5                                        | -1.15 | 0.044946 | 0.955604 |
| <i>Morn4</i>   | MORN repeat containing 4                                             | -1.15 | 0.01889  | 0.934625 |
| <i>Eva1c</i>   | eva-1 homolog C (C. elegans)                                         | -1.13 | 0.021712 | 0.934625 |
| <i>Olf1395</i> | olfactory receptor 1395                                              | -1.13 | 0.04226  | 0.955604 |
| <i>Gas2</i>    | growth arrest specific 2                                             | -1.13 | 0.015217 | 0.934625 |
| <i>Gng3</i>    | guanine nucleotide binding protein (G protein), gamma 3              | -1.13 | 0.042069 | 0.955604 |
| <i>Zcchc18</i> | zinc finger, CCHC domain containing 18                               | -1.13 | 0.047329 | 0.955604 |
| <i>Krba1</i>   | KRAB-A domain containing 1                                           | -1.12 | 0.04702  | 0.955604 |
| <i>Ddhd1</i>   | DDHD domain containing 1; microRNA 5131                              | -1.12 | 0.021439 | 0.934625 |
| <i>Sdhaf2</i>  | succinate dehydrogenase complex assembly factor 2                    | -1.12 | 0.019339 | 0.934625 |
| <i>Twist2</i>  | twist basic helix-loop-helix transcription factor 2                  | -1.12 | 0.011176 | 0.872249 |
| <i>Dnal1</i>   | dynein, axonemal, light chain 1                                      | -1.12 | 0.028245 | 0.945337 |
| <i>Usp21</i>   | ubiquitin specific peptidase 21                                      | -1.11 | 0.026302 | 0.944116 |
| <i>Nup188</i>  | nucleoporin 188                                                      | -1.1  | 0.046986 | 0.955604 |
| <i>Apaf1</i>   | apoptotic peptidase activating factor 1                              | -1.1  | 0.03739  | 0.955604 |
| <i>Kcnh6</i>   | potassium voltage-gated channel, subfamily H (eag-related), member 6 | -1.09 | 0.029996 | 0.955027 |
| <i>Pik3cg</i>  | phosphoinositide-3-kinase, catalytic, gamma polypeptide              | -1.09 | 0.046838 | 0.955604 |
| <i>Lhx1</i>    | LIM homeobox protein 1                                               | -1.08 | 0.049268 | 0.955604 |

**Table S4- Genes upregulated in the Hippocampus of Ala92-Dio2 mice. (p<0.05)**

| Gene Symbol      | Description                                                  | Fold Change (AA HC vs. TT HC) | ANOVA p-value (AA HC vs. TT HC) | FDR p-value (AA HC vs. TT HC) |
|------------------|--------------------------------------------------------------|-------------------------------|---------------------------------|-------------------------------|
| <i>Pdhb</i>      | pyruvate dehydrogenase (lipoamide) beta                      | 1.04                          | 0.037615                        | 0.999105                      |
| <i>Vps35</i>     | vacuolar protein sorting 35                                  | 1.07                          | 0.044345                        | 0.999105                      |
| <i>Gdf7</i>      | growth differentiation factor 7                              | 1.08                          | 0.03222                         | 0.999105                      |
| <i>Barhl1</i>    | BarH-like 1 (Drosophila)                                     | 1.09                          | 0.024698                        | 0.999105                      |
| <i>Cttn</i>      | cortactin                                                    | 1.09                          | 0.021089                        | 0.999105                      |
| <i>Nceh1</i>     | neutral cholesterol ester hydrolase 1                        | 1.09                          | 0.012544                        | 0.999105                      |
| <i>Syt1</i>      | synaptotagmin I                                              | 1.1                           | 0.000283                        | 0.571716                      |
| <i>Rab7</i>      | RAB7, member RAS oncogene family                             | 1.1                           | 0.033074                        | 0.999105                      |
| <i>Tsply2</i>    | TSPY-like 2                                                  | 1.11                          | 0.020248                        | 0.999105                      |
| <i>Laptm4b</i>   | lysosomal-associated protein transmembrane 4B                | 1.11                          | 0.033407                        | 0.999105                      |
| <i>Tmem87b</i>   | transmembrane protein 87B                                    | 1.11                          | 0.015227                        | 0.999105                      |
| <i>Wfdc13</i>    | WAP four-disulfide core domain 13                            | 1.11                          | 0.045724                        | 0.999105                      |
| <i>Strc</i>      | stereocilin                                                  | 1.11                          | 0.049769                        | 0.999105                      |
| <i>Eif2s2</i>    | eukaryotic translation initiation factor 2, subunit 2 (beta) | 1.11                          | 0.032049                        | 0.999105                      |
| <i>Parg</i>      | poly (ADP-ribose) glycohydrolase                             | 1.11                          | 0.020965                        | 0.999105                      |
| <i>Krtap24-1</i> | keratin associated protein 24-1                              | 1.11                          | 0.043126                        | 0.999105                      |
| <i>Hmgcs1</i>    | 3-hydroxy-3-methylglutaryl-Coenzyme A synthase 1             | 1.12                          | 0.026119                        | 0.999105                      |
| <i>Scn2a1</i>    | sodium channel, voltage-gated, type II, alpha 1              | 1.12                          | 0.045635                        | 0.999105                      |
| <i>Fbxo28</i>    | F-box protein 28                                             | 1.12                          | 0.008265                        | 0.999105                      |
| <i>Fmr1</i>      | fragile X mental retardation syndrome 1                      | 1.12                          | 0.040861                        | 0.999105                      |
| <i>Map3k7</i>    | mitogen-activated protein kinase kinase kinase 7             | 1.12                          | 0.044053                        | 0.999105                      |
| <i>Olfir523</i>  | olfactory receptor 523                                       | 1.12                          | 0.044314                        | 0.999105                      |
| <i>Hif1a</i>     | hypoxia inducible factor 1, alpha subunit                    | 1.13                          | 0.022851                        | 0.999105                      |
| <i>G3bp2</i>     | GTPase activating protein (SH3 domain) binding protein 2     | 1.13                          | 0.004472                        | 0.999105                      |
| <i>Dnajc8</i>    | DnaJ (Hsp40) homolog, subfamily C, member 8                  | 1.14                          | 0.035605                        | 0.999105                      |

|                 |                                                                              |      |          |          |
|-----------------|------------------------------------------------------------------------------|------|----------|----------|
| <i>Srpk2</i>    | serine/arginine-rich protein specific kinase 2                               | 1.14 | 0.030658 | 0.999105 |
| <i>Ap1g1</i>    | adaptor protein complex AP-1, gamma 1 subunit                                | 1.14 | 0.023136 | 0.999105 |
| <i>Psm2</i>     | proteasome (prosome, macropain) subunit, alpha type 2                        | 1.14 | 0.015632 | 0.999105 |
| <i>Pms1</i>     | postmeiotic segregation increased 1 (S. cerevisiae)                          | 1.15 | 0.019968 | 0.999105 |
| <i>Gcnt2</i>    | glucosaminyl (N-acetyl) transferase 2, I-branching enzyme                    | 1.15 | 0.045698 | 0.999105 |
| <i>Pfn2</i>     | profilin 2                                                                   | 1.15 | 0.040328 | 0.999105 |
| <i>Tuba1b</i>   | tubulin, alpha 1B                                                            | 1.15 | 0.036746 | 0.999105 |
| <i>Aph1b</i>    | anterior pharynx defective 1b homolog (C. elegans)                           | 1.15 | 0.023755 | 0.999105 |
| <i>Poglut1</i>  | protein O-glucosyltransferase 1                                              | 1.15 | 0.047525 | 0.999105 |
| <i>Rlim</i>     | ring finger protein, LIM domain interacting                                  | 1.15 | 0.038568 | 0.999105 |
| <i>Sppl2a</i>   | signal peptide peptidase like 2A                                             | 1.15 | 0.000825 | 0.796996 |
| <i>Pcmt1</i>    | protein-L-isoaspartate (D-aspartate) O-methyltransferase domain containing 1 | 1.15 | 0.039247 | 0.999105 |
| <i>Abca1</i>    | ATP-binding cassette, sub-family A (ABC1), member 1                          | 1.15 | 0.040396 | 0.999105 |
| <i>Irgq</i>     | immunity-related GTPase family, Q                                            | 1.15 | 0.025768 | 0.999105 |
| <i>Serinc1</i>  | serine incorporator 1                                                        | 1.15 | 0.045196 | 0.999105 |
| <i>Tmem184c</i> | transmembrane protein 184C                                                   | 1.15 | 0.026133 | 0.999105 |
| <i>Prh1</i>     | proline rich protein HaeIII subfamily 1                                      | 1.15 | 0.028253 | 0.999105 |
| <i>Zfp689</i>   | zinc finger protein 689                                                      | 1.15 | 0.0064   | 0.999105 |
| <i>Eci2</i>     | enoyl-Coenzyme A delta isomerase 2                                           | 1.15 | 0.014445 | 0.999105 |
| <i>Pde2a</i>    | phosphodiesterase 2A, cGMP-stimulated                                        | 1.16 | 0.019992 | 0.999105 |
| <i>Omg</i>      | oligodendrocyte myelin glycoprotein                                          | 1.16 | 0.04361  | 0.999105 |
| <i>Dnajc21</i>  | DnaJ (Hsp40) homolog, subfamily C, member 21                                 | 1.16 | 0.040094 | 0.999105 |
| <i>Abca8b</i>   | ATP-binding cassette, sub-family A (ABC1), member 8b                         | 1.16 | 0.011872 | 0.999105 |
| <i>Pnma5</i>    | paraneoplastic antigen family 5                                              | 1.16 | 0.014923 | 0.999105 |
| <i>Adk</i>      | adenosine kinase                                                             | 1.16 | 0.010033 | 0.999105 |
| <i>Vamp7</i>    | vesicle-associated membrane protein 7                                        | 1.16 | 0.01524  | 0.999105 |
| <i>Ikbb</i>     | inhibitor of kappaB kinase beta                                              | 1.16 | 0.007556 | 0.999105 |
| <i>Slc27a3</i>  | solute carrier family 27 (fatty acid transporter), member 3                  | 1.16 | 0.032021 | 0.999105 |

|                 |                                                                           |      |          |          |
|-----------------|---------------------------------------------------------------------------|------|----------|----------|
| <i>Rac1</i>     | RAS-related C3 botulinum substrate 1                                      | 1.16 | 0.017209 | 0.999105 |
| <i>C1rb</i>     | complement component 1, r subcomponent B                                  | 1.16 | 0.048435 | 0.999105 |
| <i>Olf203</i>   | olfactory receptor 203                                                    | 1.16 | 0.046066 | 0.999105 |
| <i>E2f4</i>     | E2F transcription factor 4                                                | 1.17 | 0.043409 | 0.999105 |
| <i>Cbfb</i>     | core binding factor beta                                                  | 1.17 | 0.01523  | 0.999105 |
| <i>Armc2</i>    | armadillo repeat containing 2                                             | 1.17 | 0.049178 | 0.999105 |
| <i>Pank1</i>    | pantothenate kinase 1                                                     | 1.17 | 0.034753 | 0.999105 |
| <i>Zfp788</i>   | zinc finger protein 788                                                   | 1.17 | 0.035793 | 0.999105 |
| <i>Klhl9</i>    | kelch-like 9                                                              | 1.17 | 0.008399 | 0.999105 |
| <i>Cphx3</i>    | cytoplasmic polyadenylated homeobox 3                                     | 1.17 | 0.032908 | 0.999105 |
| <i>Zfp39</i>    | zinc finger protein 39                                                    | 1.17 | 0.047342 | 0.999105 |
| <i>Pan2</i>     | PAN2 polyA specific ribonuclease subunit homolog ( <i>S. cerevisiae</i> ) | 1.18 | 0.03069  | 0.999105 |
| <i>Btrc</i>     | beta-transducin repeat containing protein                                 | 1.18 | 0.026902 | 0.999105 |
| <i>Fam69a</i>   | family with sequence similarity 69, member A                              | 1.18 | 0.016035 | 0.999105 |
| <i>Casr</i>     | calcium-sensing receptor                                                  | 1.18 | 0.047062 | 0.999105 |
| <i>Reep5</i>    | receptor accessory protein 5                                              | 1.18 | 0.043368 | 0.999105 |
| <i>Epha1</i>    | Eph receptor A1                                                           | 1.18 | 0.029501 | 0.999105 |
| <i>Prss37</i>   | protease, serine 37                                                       | 1.18 | 0.048855 | 0.999105 |
| <i>Cenpw</i>    | centromere protein W                                                      | 1.18 | 0.043167 | 0.999105 |
| <i>Fam49a</i>   | family with sequence similarity 49, member A                              | 1.19 | 0.044363 | 0.999105 |
| <i>Hs3st3a1</i> | heparan sulfate (glucosamine) 3-O-sulfotransferase 3A1                    | 1.19 | 0.025486 | 0.999105 |
| <i>Cnep1r1</i>  | CTD nuclear envelope phosphatase 1 regulatory subunit 1                   | 1.19 | 0.023041 | 0.999105 |
| <i>Tfg</i>      | Trk-fused gene                                                            | 1.19 | 0.040591 | 0.999105 |
| <i>Tdg</i>      | thymine DNA glycosylase; thymine DNA glycosylase pseudogene               | 1.19 | 0.017885 | 0.999105 |
| <i>Taf15</i>    | TAF15 RNA polymerase II, TATA box binding protein (TBP)-associated factor | 1.19 | 0.047786 | 0.999105 |
| <i>Smek2</i>    | SMEK homolog 2, suppressor of mek1 ( <i>Dictyostelium</i> )               | 1.19 | 0.008058 | 0.999105 |
| <i>Dync1i2</i>  | dynein cytoplasmic 1 intermediate chain 2                                 | 1.19 | 0.03881  | 0.999105 |
| <i>Scaf4</i>    | SR-related CTD-associated factor 4                                        | 1.19 | 0.034819 | 0.999105 |
| <i>Poc1a</i>    | POC1 centriolar protein homolog A ( <i>Chlamydomonas</i> )                | 1.19 | 0.030738 | 0.999105 |
| <i>Tcerg1</i>   | transcription elongation regulator 1 (CA150)                              | 1.19 | 0.00619  | 0.999105 |

|                |                                                                                    |      |          |          |
|----------------|------------------------------------------------------------------------------------|------|----------|----------|
| <i>Pcmt1</i>   | protein-L-isoaspartate (D-aspartate) O-methyltransferase 1; cDNA sequence BC020402 | 1.19 | 0.039959 | 0.999105 |
| <i>Usp34</i>   | ubiquitin specific peptidase 34                                                    | 1.19 | 0.004418 | 0.999105 |
| <i>Rabggtb</i> | Rab geranylgeranyl transferase, b subunit; small nucleolar RNA, C/D box 45C        | 1.19 | 0.005023 | 0.999105 |
| <i>Epb41l5</i> | erythrocyte membrane protein band 4.1 like 5                                       | 1.19 | 0.036635 | 0.999105 |
| <i>Olf1229</i> | olfactory receptor 1229                                                            | 1.19 | 0.032186 | 0.999105 |
| <i>Zdhhc4</i>  | zinc finger, DHHC domain containing 4                                              | 1.19 | 0.034072 | 0.999105 |
| <i>Ubl7</i>    | ubiquitin-like 7 (bone marrow stromal cell-derived)                                | 1.19 | 0.002062 | 0.999105 |
| <i>Abca6</i>   | ATP-binding cassette, sub-family A (ABC1), member 6                                | 1.19 | 0.030396 | 0.999105 |
| <i>Zfp493</i>  | zinc finger protein 493                                                            | 1.19 | 0.039368 | 0.999105 |
| <i>Nkx3-1</i>  | NK-3 transcription factor, locus 1 (Drosophila)                                    | 1.19 | 0.032682 | 0.999105 |
| <i>Mtrf1</i>   | mitochondrial translational release factor 1                                       | 1.19 | 0.035017 | 0.999105 |
| <i>Sod2</i>    | superoxide dismutase 2, mitochondrial                                              | 1.19 | 0.014142 | 0.999105 |
| <i>Slc3a1</i>  | solute carrier family 3, member 1                                                  | 1.19 | 0.009733 | 0.999105 |
| <i>Pcdhb1</i>  | protocadherin beta 1                                                               | 1.19 | 0.022451 | 0.999105 |
| <i>Dcaf6</i>   | DDB1 and CUL4 associated factor 6                                                  | 1.2  | 0.008019 | 0.999105 |
| <i>Swt1</i>    | SWT1 RNA endoribonuclease homolog (S. cerevisiae)                                  | 1.2  | 0.029127 | 0.999105 |
| <i>Kif3b</i>   | kinesin family member 3B                                                           | 1.2  | 0.02945  | 0.999105 |
| <i>Ccdc159</i> | coiled-coil domain containing 159                                                  | 1.2  | 0.037019 | 0.999105 |
| <i>Agps</i>    | alkylglycerone phosphate synthase                                                  | 1.2  | 0.030459 | 0.999105 |
| <i>Serbp1</i>  | serpine1 mRNA binding protein 1                                                    | 1.2  | 0.008183 | 0.999105 |
| <i>Myh7b</i>   | myosin, heavy chain 7B, cardiac muscle, beta                                       | 1.2  | 0.015997 | 0.999105 |
| <i>Slc5a9</i>  | solute carrier family 5 (sodium/glucose cotransporter), member 9                   | 1.2  | 0.021282 | 0.999105 |
| <i>Sertad3</i> | SERTA domain containing 3                                                          | 1.2  | 0.023319 | 0.999105 |
| <i>Ces2f</i>   | carboxylesterase 2F                                                                | 1.2  | 0.010804 | 0.999105 |
| <i>Aph1c</i>   | anterior pharynx defective 1c homolog (C. elegans)                                 | 1.2  | 0.041192 | 0.999105 |
| <i>Gltpd2</i>  | glycolipid transfer protein domain containing 2                                    | 1.2  | 0.017979 | 0.999105 |
| <i>Ckmt2</i>   | creatine kinase, mitochondrial 2                                                   | 1.2  | 0.014874 | 0.999105 |
| <i>Ap3m1</i>   | adaptor-related protein complex 3, mu 1 subunit                                    | 1.2  | 0.01096  | 0.999105 |



|                  |                                                                              |      |          |          |
|------------------|------------------------------------------------------------------------------|------|----------|----------|
| <i>Gpalpp1</i>   | GPALPP motifs containing 1                                                   | 1.2  | 0.010915 | 0.999105 |
| <i>St8sia5</i>   | ST8 alpha-N-acetyl-neuraminide alpha-2,8-sialyltransferase 5                 | 1.21 | 0.016624 | 0.999105 |
| <i>Gpc5</i>      | glypican 5                                                                   | 1.21 | 0.028807 | 0.999105 |
| <i>Herc3</i>     | hect domain and RLD 3                                                        | 1.21 | 0.000133 | 0.422205 |
| <i>Rrp12</i>     | ribosomal RNA processing 12 homolog (S. cerevisiae)                          | 1.21 | 0.021703 | 0.999105 |
| <i>Lztfl1</i>    | leucine zipper transcription factor-like 1                                   | 1.21 | 0.007973 | 0.999105 |
| <i>Gdi2</i>      | guanosine diphosphate (GDP) dissociation inhibitor 2                         | 1.21 | 0.029175 | 0.999105 |
| <i>Dcun1d1</i>   | DCN1, defective in cullin neddylation 1, domain containing 1 (S. cerevisiae) | 1.21 | 0.04869  | 0.999105 |
| <i>Abca12</i>    | ATP-binding cassette, sub-family A (ABC1), member 12                         | 1.21 | 0.03636  | 0.999105 |
| <i>Patl2</i>     | protein associated with topoisomerase II homolog 2 (yeast)                   | 1.21 | 0.019095 | 0.999105 |
| <i>Mapk1ip1l</i> | mitogen-activated protein kinase 1 interacting protein 1-like                | 1.21 | 0.026275 | 0.999105 |
| <i>Tmed7</i>     | transmembrane emp24 protein transport domain containing 7                    | 1.21 | 0.040011 | 0.999105 |
| <i>Plk2</i>      | polo-like kinase 2                                                           | 1.22 | 0.040112 | 0.999105 |
| <i>Snx10</i>     | sorting nexin 10                                                             | 1.22 | 0.028955 | 0.999105 |
| <i>Utrn</i>      | utrophin                                                                     | 1.22 | 0.020689 | 0.999105 |
| <i>Pls3</i>      | plastin 3 (T-isoform)                                                        | 1.22 | 0.007769 | 0.999105 |
| <i>Ntn1</i>      | netrin 1                                                                     | 1.22 | 0.043562 | 0.999105 |
| <i>Ldha</i>      | lactate dehydrogenase A                                                      | 1.22 | 0.03562  | 0.999105 |
| <i>Fam45a</i>    | family with sequence similarity 45, member A                                 | 1.22 | 0.048227 | 0.999105 |
| <i>Prkcb</i>     | protein kinase C, beta                                                       | 1.22 | 0.002553 | 0.999105 |
| <i>Chchd4</i>    | coiled-coil-helix-coiled-coil-helix domain containing 4                      | 1.22 | 0.037194 | 0.999105 |
| <i>Map2k5</i>    | mitogen-activated protein kinase kinase 5                                    | 1.22 | 0.013077 | 0.999105 |
| <i>Bcas3</i>     | breast carcinoma amplified sequence 3                                        | 1.22 | 0.043455 | 0.999105 |
| <i>Styx</i>      | serine/threonine/tyrosine interaction protein                                | 1.22 | 0.008279 | 0.999105 |
| <i>Ugcg</i>      | UDP-glucose ceramide glucosyltransferase                                     | 1.22 | 0.040251 | 0.999105 |
| <i>Dld</i>       | dihydrolipoamide dehydrogenase                                               | 1.22 | 0.024427 | 0.999105 |
| <i>Eif2ak1</i>   | eukaryotic translation initiation factor 2 alpha kinase 1                    | 1.22 | 0.022561 | 0.999105 |
| <i>Itm2a</i>     | integral membrane protein 2A                                                 | 1.22 | 0.036931 | 0.999105 |
| <i>Trim45</i>    | tripartite motif-containing 45                                               | 1.22 | 0.044644 | 0.999105 |

|                |                                                                                                               |      |          |          |
|----------------|---------------------------------------------------------------------------------------------------------------|------|----------|----------|
| <i>Utp15</i>   | UTP15, U3 small nucleolar ribonucleoprotein, homolog (yeast)                                                  | 1.22 | 0.045344 | 0.999105 |
| <i>Mdga2</i>   | MAM domain containing glycosylphosphatidylinositol anchor 2                                                   | 1.23 | 0.03743  | 0.999105 |
| <i>Gnaz</i>    | guanine nucleotide binding protein, alpha z subunit                                                           | 1.23 | 0.034091 | 0.999105 |
| <i>Dopey1</i>  | dopey family member 1                                                                                         | 1.23 | 0.004989 | 0.999105 |
| <i>Gpr137c</i> | G protein-coupled receptor 137C                                                                               | 1.23 | 0.034584 | 0.999105 |
| <i>Lclat1</i>  | lysocardiolipin acyltransferase 1                                                                             | 1.23 | 0.02578  | 0.999105 |
| <i>Rb1</i>     | retinoblastoma 1                                                                                              | 1.23 | 0.014379 | 0.999105 |
| <i>Sox12</i>   | SRY (sex determining region Y)-box 12                                                                         | 1.23 | 0.042271 | 0.999105 |
| <i>Zc3h14</i>  | zinc finger CCCH type containing 14                                                                           | 1.23 | 0.041005 | 0.999105 |
| <i>Cstf2t</i>  | cleavage stimulation factor, 3 pre-RNA subunit 2, tau; cleavage stimulation factor, 3' pre-RNA subunit 2, tau | 1.23 | 0.044348 | 0.999105 |
| <i>Rbbp6</i>   | retinoblastoma binding protein 6                                                                              | 1.23 | 0.037325 | 0.999105 |
| <i>Zbtb5</i>   | zinc finger and BTB domain containing 5                                                                       | 1.23 | 0.044097 | 0.999105 |
| <i>Wdr34</i>   | WD repeat domain 34                                                                                           | 1.23 | 0.035251 | 0.999105 |
| <i>Rnpepl1</i> | arginyl aminopeptidase (aminopeptidase B)-like 1                                                              | 1.23 | 0.015689 | 0.999105 |
| <i>Kbtbd7</i>  | kelch repeat and BTB (POZ) domain containing 7                                                                | 1.23 | 0.03347  | 0.999105 |
| <i>Hacd4</i>   | 3-hydroxyacyl-CoA dehydratase 4                                                                               | 1.23 | 0.000058 | 0.321491 |
| <i>Hdlbp</i>   | high density lipoprotein (HDL) binding protein                                                                | 1.23 | 0.005122 | 0.999105 |
| <i>Col9a1</i>  | collagen, type IX, alpha 1                                                                                    | 1.23 | 0.014068 | 0.999105 |
| <i>Drd4</i>    | dopamine receptor D4                                                                                          | 1.23 | 0.022227 | 0.999105 |
| <i>Tsku</i>    | tsukushi, small leucine rich proteoglycan                                                                     | 1.23 | 0.003365 | 0.999105 |
| <i>Slc7a2</i>  | solute carrier family 7 (cationic amino acid transporter, y+ system), member 2                                | 1.23 | 0.048344 | 0.999105 |
| <i>Ccr7</i>    | chemokine (C-C motif) receptor 7                                                                              | 1.23 | 0.023775 | 0.999105 |
| <i>Csrnp3</i>  | cysteine-serine-rich nuclear protein 3                                                                        | 1.24 | 0.026231 | 0.999105 |
| <i>Galnt16</i> | UDP-N-acetyl-alpha-D-galactosamine:polypeptide N-acetylgalactosaminyltransferase-like 6                       | 1.24 | 0.026109 | 0.999105 |
| <i>Mkl2</i>    | MKL/myocardin-like 2                                                                                          | 1.24 | 0.018085 | 0.999105 |

|                 |                                                                                |      |          |          |
|-----------------|--------------------------------------------------------------------------------|------|----------|----------|
| <i>Smc1a</i>    | structural maintenance of chromosomes 1A                                       | 1.24 | 0.044315 | 0.999105 |
| <i>Nhlrc3</i>   | NHL repeat containing 3                                                        | 1.24 | 0.041186 | 0.999105 |
| <i>Opa1</i>     | optic atrophy 1                                                                | 1.24 | 0.002485 | 0.999105 |
| <i>Ficd</i>     | FIC domain containing                                                          | 1.24 | 0.006235 | 0.999105 |
| <i>Dnaic2</i>   | dynein, axonemal, intermediate chain 2                                         | 1.24 | 0.025034 | 0.999105 |
| <i>Ubl4b</i>    | ubiquitin-like 4B                                                              | 1.24 | 0.034813 | 0.999105 |
| <i>Cyp4a30b</i> | cytochrome P450, family 4, subfamily a, polypeptide 30b                        | 1.24 | 0.01062  | 0.999105 |
| <i>Msx1</i>     | msh homeobox 1                                                                 | 1.24 | 0.014666 | 0.999105 |
| <i>Pycard</i>   | PYD and CARD domain containing                                                 | 1.24 | 0.012786 | 0.999105 |
| <i>Fam90a1a</i> | family with sequence similarity 90, member A1A                                 | 1.24 | 0.04271  | 0.999105 |
| <i>Trpv1</i>    | transient receptor potential cation channel, subfamily V, member 1             | 1.24 | 0.025946 | 0.999105 |
| <i>Zfp944</i>   | zinc finger protein 944                                                        | 1.24 | 0.007369 | 0.999105 |
| <i>Cdh13</i>    | cadherin 13                                                                    | 1.25 | 0.032714 | 0.999105 |
| <i>Drp2</i>     | dystrophin related protein 2                                                   | 1.25 | 0.046182 | 0.999105 |
| <i>Ube2o</i>    | ubiquitin-conjugating enzyme E2O                                               | 1.25 | 0.009507 | 0.999105 |
| <i>Kpna2</i>    | karyopherin (importin) alpha 2                                                 | 1.25 | 0.020738 | 0.999105 |
| <i>Atmin</i>    | ATM interactor                                                                 | 1.25 | 0.020919 | 0.999105 |
| <i>Ctage5</i>   | CTAGE family, member 5                                                         | 1.25 | 0.021327 | 0.999105 |
| <i>Zbtb38</i>   | zinc finger and BTB domain containing 38; RIKEN cDNA E030011O05 gene           | 1.25 | 0.011537 | 0.999105 |
| <i>Pter</i>     | phosphotriesterase related                                                     | 1.25 | 0.017034 | 0.999105 |
| <i>Setmar</i>   | SET domain without mariner transposase fusion                                  | 1.25 | 0.021731 | 0.999105 |
| <i>Mob4</i>     | MOB family member 4, phocein                                                   | 1.25 | 0.019216 | 0.999105 |
| <i>H2-Q7</i>    | histocompatibility 2, Q region locus 7; histocompatibility 2, Q region locus 9 | 1.25 | 0.020731 | 0.999105 |
| <i>Adgrf5</i>   | adhesion G protein-coupled receptor F5                                         | 1.25 | 0.004811 | 0.999105 |
| <i>Lax1</i>     | lymphocyte transmembrane adaptor 1                                             | 1.25 | 0.042735 | 0.999105 |
| <i>Gatc</i>     | glutamyl-tRNA(Gln) amidotransferase, subunit C                                 | 1.25 | 0.009482 | 0.999105 |
| <i>Gspt1</i>    | G1 to S phase transition 1                                                     | 1.25 | 0.004446 | 0.999105 |
| <i>Slc26a2</i>  | solute carrier family 26 (sulfate transporter), member 2                       | 1.26 | 0.017591 | 0.999105 |
| <i>Adm</i>      | adrenomedullin                                                                 | 1.26 | 0.024222 | 0.999105 |
| <i>Acvr2b</i>   | activin receptor IIB                                                           | 1.26 | 0.040519 | 0.999105 |

|                |                                                                                                                   |      |          |          |
|----------------|-------------------------------------------------------------------------------------------------------------------|------|----------|----------|
| <i>Stt3b</i>   | STT3, subunit of the oligosaccharyltransferase complex, homolog B ( <i>S. cerevisiae</i> )                        | 1.26 | 0.014018 | 0.999105 |
| <i>Paics</i>   | phosphoribosylaminoimidazole carboxylase, phosphoribosylaminoribosylaminoimidazole, succinocarboxamide synthetase | 1.26 | 0.031793 | 0.999105 |
| <i>Ppat</i>    | phosphoribosyl pyrophosphate amidotransferase                                                                     | 1.26 | 0.018521 | 0.999105 |
| <i>Zfp287</i>  | zinc finger protein 287                                                                                           | 1.26 | 0.010728 | 0.999105 |
| <i>Slc22a6</i> | solute carrier family 22 (organic anion transporter), member 6                                                    | 1.26 | 0.005735 | 0.999105 |
| <i>Prim2</i>   | DNA primase, p58 subunit                                                                                          | 1.26 | 0.02415  | 0.999105 |
| <i>Dhtkd1</i>  | dehydrogenase E1 and transketolase domain containing 1                                                            | 1.26 | 0.019487 | 0.999105 |
| <i>Cldn7</i>   | claudin 7                                                                                                         | 1.26 | 0.021294 | 0.999105 |
| <i>Srsf7</i>   | serine/arginine-rich splicing factor 7                                                                            | 1.26 | 0.028495 | 0.999105 |
| <i>Socs3</i>   | suppressor of cytokine signaling 3                                                                                | 1.26 | 0.04484  | 0.999105 |
| <i>Slc6a19</i> | solute carrier family 6 (neurotransmitter transporter), member 19                                                 | 1.26 | 0.031972 | 0.999105 |
| <i>Entpd3</i>  | ectonucleoside triphosphate diphosphohydrolase 3                                                                  | 1.27 | 0.014958 | 0.999105 |
| <i>Kcnk3</i>   | potassium channel, subfamily K, member 3                                                                          | 1.27 | 0.042286 | 0.999105 |
| <i>Pdcd4</i>   | programmed cell death 4                                                                                           | 1.27 | 0.042435 | 0.999105 |
| <i>Eya4</i>    | eyes absent 4 homolog ( <i>Drosophila</i> )                                                                       | 1.27 | 0.04923  | 0.999105 |
| <i>Ndfip2</i>  | Nedd4 family interacting protein 2                                                                                | 1.27 | 0.031596 | 0.999105 |
| <i>Nek7</i>    | NIMA (never in mitosis gene a)-related expressed kinase 7                                                         | 1.27 | 0.049221 | 0.999105 |
| <i>Chmp2b</i>  | charged multivesicular body protein 2B                                                                            | 1.27 | 0.040447 | 0.999105 |
| <i>Wdr48</i>   | WD repeat domain 48                                                                                               | 1.27 | 0.000955 | 0.822518 |
| <i>Spopl</i>   | speckle-type POZ protein-like                                                                                     | 1.27 | 0.006267 | 0.999105 |
| <i>Olf1143</i> | olfactory receptor 1143                                                                                           | 1.27 | 0.011333 | 0.999105 |
| <i>Ddx60</i>   | DEAD (Asp-Glu-Ala-Asp) box polypeptide 60                                                                         | 1.27 | 0.030443 | 0.999105 |
| <i>Nkapl</i>   | NFKB activating protein-like                                                                                      | 1.27 | 0.003312 | 0.999105 |
| <i>Olf748</i>  | olfactory receptor 748                                                                                            | 1.27 | 0.036471 | 0.999105 |
| <i>Sgtb</i>    | small glutamine-rich tetratricopeptide repeat (TPR)-containing, beta                                              | 1.28 | 0.01638  | 0.999105 |

|                 |                                                                                                         |      |          |          |
|-----------------|---------------------------------------------------------------------------------------------------------|------|----------|----------|
| <i>Ctdspl2</i>  | CTD (carboxy-terminal domain, RNA polymerase II, polypeptide A) small phosphatase like 2                | 1.28 | 0.020832 | 0.999105 |
| <i>Ccdc127</i>  | coiled-coil domain containing 127                                                                       | 1.28 | 0.028235 | 0.999105 |
| <i>Dnajc10</i>  | DnaJ (Hsp40) homolog, subfamily C, member 10                                                            | 1.28 | 0.030401 | 0.999105 |
| <i>Kirrel2</i>  | kin of IRRE like 2 (Drosophila)                                                                         | 1.28 | 0.012014 | 0.999105 |
| <i>Cpq</i>      | carboxypeptidase Q                                                                                      | 1.28 | 0.000987 | 0.822518 |
| <i>Krt26</i>    | keratin 26                                                                                              | 1.28 | 0.036894 | 0.999105 |
| <i>Guca2a</i>   | guanylate cyclase activator 2a (guanylin)                                                               | 1.28 | 0.035773 | 0.999105 |
| <i>Zfp534</i>   | zinc finger protein 534                                                                                 | 1.28 | 0.022931 | 0.999105 |
| <i>Cmtm2b</i>   | CKLF-like MARVEL transmembrane domain containing 2B                                                     | 1.28 | 0.039135 | 0.999105 |
| <i>Nags</i>     | N-acetylglutamate synthase                                                                              | 1.28 | 0.032782 | 0.999105 |
| <i>Naa30</i>    | N(alpha)-acetyltransferase 30, NatC catalytic subunit                                                   | 1.28 | 0.004622 | 0.999105 |
| <i>P2rx6</i>    | purinergic receptor P2X, ligand-gated ion channel, 6                                                    | 1.28 | 0.040551 | 0.999105 |
| <i>Ifit1bl1</i> | interferon induced protein with tetratricopeptide repeats 1B like 1                                     | 1.29 | 0.045914 | 0.999105 |
| <i>Rcor3</i>    | REST corepressor 3                                                                                      | 1.29 | 0.040138 | 0.999105 |
| <i>Extl2</i>    | exostoses (multiple)-like 2                                                                             | 1.29 | 0.047946 | 0.999105 |
| <i>Zfp729a</i>  | zinc finger protein 729a                                                                                | 1.29 | 0.039887 | 0.999105 |
| <i>Wasf3</i>    | WAS protein family, member 3                                                                            | 1.29 | 0.008831 | 0.999105 |
| <i>Lpar4</i>    | lysophosphatidic acid receptor 4                                                                        | 1.29 | 0.032373 | 0.999105 |
| <i>Cmc1</i>     | COX assembly mitochondrial protein 1                                                                    | 1.29 | 0.032166 | 0.999105 |
| <i>Fes</i>      | feline sarcoma oncogene                                                                                 | 1.29 | 0.018637 | 0.999105 |
| <i>Cyp17a1</i>  | cytochrome P450, family 17, subfamily a, polypeptide 1                                                  | 1.29 | 0.049996 | 0.999105 |
| <i>Adgrl4</i>   | adhesion G protein-coupled receptor L4                                                                  | 1.29 | 0.032925 | 0.999105 |
| <i>Klhdc7a</i>  | kelch domain containing 7A; microRNA 2139                                                               | 1.29 | 0.012151 | 0.999105 |
| <i>Skap1</i>    | src family associated phosphoprotein 1                                                                  | 1.29 | 0.046933 | 0.999105 |
| <i>Btaf1</i>    | BTAf1 RNA polymerase II, B-TFIID transcription factor-associated, (Mot1 homolog, <i>S. cerevisiae</i> ) | 1.29 | 0.031125 | 0.999105 |
| <i>Zkscan17</i> | zinc finger with KRAB and SCAN domains 17                                                               | 1.3  | 0.01367  | 0.999105 |
| <i>Arid2</i>    | AT rich interactive domain 2 (ARID, RFX-like)                                                           | 1.3  | 0.028306 | 0.999105 |

|                     |                                                                                                                                                                                                                                         |      |          |          |
|---------------------|-----------------------------------------------------------------------------------------------------------------------------------------------------------------------------------------------------------------------------------------|------|----------|----------|
| <i>Atrx</i>         | alpha thalassemia/mental retardation syndrome<br>X-linked homolog (human)                                                                                                                                                               | 1.3  | 0.000258 | 0.571716 |
| <i>Tmem121</i>      | transmembrane protein 121                                                                                                                                                                                                               | 1.3  | 0.03065  | 0.999105 |
| <i>Selp</i>         | selectin, platelet                                                                                                                                                                                                                      | 1.3  | 0.040678 | 0.999105 |
| <i>LOC100040786</i> | 21340<br>similar to Ssty2 protein (LOC100040786), mRNA.;<br>Y-linked testis-specific protein 1-like;<br>spermiogenesis specific transcript on the Y 2,<br>mRNA (cDNA clone MGC:107175<br>IMAGE:6774426), complete cds.; predicted gene, | 1.3  | 0.007232 | 0.999105 |
| <i>Arl5c</i>        | ADP-ribosylation factor-like 5C                                                                                                                                                                                                         | 1.3  | 0.045803 | 0.999105 |
| <i>Prss33</i>       | protease, serine 33                                                                                                                                                                                                                     | 1.3  | 0.039016 | 0.999105 |
| <i>Spink6</i>       | serine peptidase inhibitor, Kazal type 6                                                                                                                                                                                                | 1.3  | 0.025834 | 0.999105 |
| <i>Homer1</i>       | homer homolog 1 (Drosophila)                                                                                                                                                                                                            | 1.31 | 0.028388 | 0.999105 |
| <i>Wbp11</i>        | WW domain binding protein 11                                                                                                                                                                                                            | 1.31 | 0.008445 | 0.999105 |
| <i>Sh3glb1</i>      | SH3-domain GRB2-like B1 (endophilin)                                                                                                                                                                                                    | 1.31 | 0.04175  | 0.999105 |
| <i>Taf4b</i>        | TAF4B RNA polymerase II, TATA box binding<br>protein (TBP)-associated factor                                                                                                                                                            | 1.31 | 0.024898 | 0.999105 |
| <i>Cntln</i>        | centlein, centrosomal protein                                                                                                                                                                                                           | 1.31 | 0.044639 | 0.999105 |
| <i>Tgm6</i>         | transglutaminase 6                                                                                                                                                                                                                      | 1.31 | 0.029031 | 0.999105 |
| <i>Lmx1b</i>        | LIM homeobox transcription factor 1 beta                                                                                                                                                                                                | 1.31 | 0.005101 | 0.999105 |
| <i>Olf23</i>        | olfactory receptor 23                                                                                                                                                                                                                   | 1.31 | 0.032181 | 0.999105 |
| <i>Olf24</i>        | olfactory receptor 24                                                                                                                                                                                                                   | 1.31 | 0.031214 | 0.999105 |
| <i>Gjd4</i>         | gap junction protein, delta 4                                                                                                                                                                                                           | 1.31 | 0.00231  | 0.999105 |
| <i>Adgrl3</i>       | adhesion G protein-coupled receptor L3                                                                                                                                                                                                  | 1.32 | 0.033023 | 0.999105 |
| <i>Mapk9</i>        | mitogen-activated protein kinase 9                                                                                                                                                                                                      | 1.32 | 0.029653 | 0.999105 |
| <i>Wdr74</i>        | WD repeat domain 74                                                                                                                                                                                                                     | 1.32 | 0.0034   | 0.999105 |
| <i>Ttc38</i>        | tetratricopeptide repeat domain 38                                                                                                                                                                                                      | 1.32 | 0.043382 | 0.999105 |
| <i>Fgd3</i>         | FYVE, RhoGEF and PH domain containing 3                                                                                                                                                                                                 | 1.32 | 0.026395 | 0.999105 |
| <i>Btd18</i>        | BTB (POZ) domain containing 18                                                                                                                                                                                                          | 1.32 | 0.023236 | 0.999105 |
| <i>Spint5</i>       | serine protease inhibitor, Kunitz type 5                                                                                                                                                                                                | 1.32 | 0.039809 | 0.999105 |
| <i>Slc25a12</i>     | solute carrier family 25 (mitochondrial carrier,<br>Aralar), member 12                                                                                                                                                                  | 1.32 | 0.015563 | 0.999105 |
| <i>Vmn1r118</i>     | vomeroneural 1 receptor 118                                                                                                                                                                                                             | 1.32 | 0.046418 | 0.999105 |

|                 |                                                                      |      |          |          |
|-----------------|----------------------------------------------------------------------|------|----------|----------|
| <i>Vmn1r118</i> | vomeronasal 1 receptor 118; predicted gene 4498; predicted gene 8453 | 1.32 | 0.046418 | 0.999105 |
| <i>Zfp101</i>   | zinc finger protein 101                                              | 1.33 | 0.042539 | 0.999105 |
| <i>Dcaf12l2</i> | DDB1 and CUL4 associated factor 12-like 2                            | 1.33 | 0.030998 | 0.999105 |
| <i>Trim61</i>   | tripartite motif-containing 61; tripartite motif-containing 60       | 1.33 | 0.02496  | 0.999105 |
| <i>Ddx4</i>     | DEAD (Asp-Glu-Ala-Asp) box polypeptide 4                             | 1.33 | 0.043708 | 0.999105 |
| <i>Lyz1</i>     | lysozyme 1                                                           | 1.33 | 0.014819 | 0.999105 |
| <i>Dus4l</i>    | dihydrouridine synthase 4-like ( <i>S. cerevisiae</i> )              | 1.33 | 0.014382 | 0.999105 |
| <i>Fam114a1</i> | family with sequence similarity 114, member A1                       | 1.33 | 0.019359 | 0.999105 |
| <i>Clec4b2</i>  | C-type lectin domain family 4, member b2                             | 1.33 | 0.021918 | 0.999105 |
| <i>Prss42</i>   | protease, serine 42                                                  | 1.33 | 0.021464 | 0.999105 |
| <i>Akr1b7</i>   | aldo-keto reductase family 1, member B7                              | 1.34 | 0.011232 | 0.999105 |
| <i>Mettl7a1</i> | methyltransferase like 7A1                                           | 1.34 | 0.035429 | 0.999105 |
| <i>Zc3h15</i>   | zinc finger CCCH-type containing 15                                  | 1.34 | 0.033742 | 0.999105 |
| <i>Fam204a</i>  | family with sequence similarity 204, member A                        | 1.34 | 0.002054 | 0.999105 |
| <i>Pqbp1</i>    | polyglutamine binding protein 1                                      | 1.34 | 0.005806 | 0.999105 |
| <i>Olf1294</i>  | olfactory receptor 1294                                              | 1.34 | 0.016722 | 0.999105 |
| <i>Olf1312</i>  | olfactory receptor 1312                                              | 1.34 | 0.049482 | 0.999105 |
| <i>Cisd2</i>    | CDGSH iron sulfur domain 2                                           | 1.34 | 0.013853 | 0.999105 |
| <i>Prcp</i>     | prolylcarboxypeptidase (angiotensinase C)                            | 1.34 | 0.048496 | 0.999105 |
| <i>Olf1679</i>  | olfactory receptor 679                                               | 1.34 | 0.00649  | 0.999105 |
| <i>Thoc1</i>    | THO complex 1                                                        | 1.34 | 0.012972 | 0.999105 |
| <i>Akap5</i>    | A kinase (PRKA) anchor protein 5                                     | 1.35 | 0.031813 | 0.999105 |
| <i>1-Mar</i>    | membrane-associated ring finger (C3HC4) 1                            | 1.35 | 0.033089 | 0.999105 |
| <i>Rpp25</i>    | ribonuclease P/MRP 25 subunit                                        | 1.35 | 0.047604 | 0.999105 |
| <i>Yif1b</i>    | Yip1 interacting factor homolog B ( <i>S. cerevisiae</i> )           | 1.35 | 0.017328 | 0.999105 |
| <i>Tram1l1</i>  | translocation associated membrane protein 1-like 1                   | 1.35 | 0.002426 | 0.999105 |
| <i>Zscan26</i>  | zinc finger and SCAN domain containing 26                            | 1.35 | 0.013617 | 0.999105 |
| <i>Fnip1</i>    | folliculin interacting protein 1                                     | 1.35 | 0.028482 | 0.999105 |
| <i>Smtnl1</i>   | smoothelin-like 1                                                    | 1.35 | 0.040719 | 0.999105 |
| <i>Dnah8</i>    | dynein, axonemal, heavy chain 8                                      | 1.35 | 0.013596 | 0.999105 |
| <i>Micalcl</i>  | MICAL C-terminal like                                                | 1.35 | 0.036014 | 0.999105 |

|                |                                                                                        |      |          |          |
|----------------|----------------------------------------------------------------------------------------|------|----------|----------|
| <i>Olf871</i>  | olfactory receptor 871                                                                 | 1.35 | 0.022714 | 0.999105 |
| <i>Rfesd</i>   | Rieske (Fe-S) domain containing                                                        | 1.35 | 0.024517 | 0.999105 |
| <i>Ccdc65</i>  | coiled-coil domain containing 65                                                       | 1.36 | 0.023181 | 0.999105 |
| <i>Xpa</i>     | xeroderma pigmentosum, complementation group A                                         | 1.36 | 0.013287 | 0.999105 |
| <i>Abcg2</i>   | ATP-binding cassette, sub-family G (WHITE), member 2                                   | 1.36 | 0.004484 | 0.999105 |
| <i>Rgcc</i>    | regulator of cell cycle                                                                | 1.36 | 0.030881 | 0.999105 |
| <i>Olf1219</i> | olfactory receptor 1219                                                                | 1.36 | 0.02204  | 0.999105 |
| <i>Tram2</i>   | translocating chain-associating membrane protein 2                                     | 1.36 | 0.010373 | 0.999105 |
| <i>Ifne</i>    | interferon epsilon                                                                     | 1.36 | 0.013939 | 0.999105 |
| <i>Syne3</i>   | spectrin repeat containing, nuclear envelope family member 3                           | 1.36 | 0.004478 | 0.999105 |
| <i>Slc38a9</i> | solute carrier family 38, member 9                                                     | 1.36 | 0.026014 | 0.999105 |
| <i>Pbdc1</i>   | polysaccharide biosynthesis domain containing 1                                        | 1.37 | 0.012688 | 0.999105 |
| <i>Cln6</i>    | ceroid-lipofuscinosis, neuronal 6                                                      | 1.37 | 0.02028  | 0.999105 |
| <i>Uprt</i>    | uracil phosphoribosyltransferase (FUR1) homolog ( <i>S. cerevisiae</i> )               | 1.37 | 0.002651 | 0.999105 |
| <i>Naip6</i>   | NLR family, apoptosis inhibitory protein 6; NLR family, apoptosis inhibitory protein 7 | 1.37 | 0.001604 | 0.999105 |
| <i>Wfdc5</i>   | WAP four-disulfide core domain 5                                                       | 1.37 | 0.039606 | 0.999105 |
| <i>Efcab8</i>  | EF-hand calcium binding domain 8                                                       | 1.37 | 0.00764  | 0.999105 |
| <i>Defb36</i>  | defensin beta 36                                                                       | 1.37 | 0.019034 | 0.999105 |
| <i>Pak1ip1</i> | PAK1 interacting protein 1                                                             | 1.37 | 0.014688 | 0.999105 |
| <i>Olf1444</i> | olfactory receptor 1444                                                                | 1.37 | 0.028097 | 0.999105 |
| <i>Kctd1</i>   | potassium channel tetramerisation domain containing 1                                  | 1.38 | 0.012412 | 0.999105 |
| <i>Rspo1</i>   | R-spondin 1                                                                            | 1.38 | 0.011332 | 0.999105 |
| <i>Vps37c</i>  | vacuolar protein sorting 37C (yeast)                                                   | 1.38 | 0.014238 | 0.999105 |
| <i>Zfp141</i>  | zinc finger protein 141                                                                | 1.38 | 0.020527 | 0.999105 |
| <i>Inca1</i>   | inhibitor of CDK, cyclin A1 interacting protein 1                                      | 1.38 | 0.022566 | 0.999105 |
| <i>Srd5a1</i>  | steroid 5 alpha-reductase 1                                                            | 1.38 | 0.040416 | 0.999105 |
| <i>Lrrc14</i>  | leucine rich repeat containing 14                                                      | 1.38 | 0.049149 | 0.999105 |
| <i>Zfp383</i>  | zinc finger protein 383                                                                | 1.39 | 0.026997 | 0.999105 |
| <i>Galnt1</i>  | UDP-N-acetyl-alpha-D-galactosamine:polypeptide N-acetylgalactosaminyltransferase 1     | 1.39 | 0.018475 | 0.999105 |
| <i>Nsl1</i>    | NSL1, MIND kinetochore complex component, homolog ( <i>S. cerevisiae</i> )             | 1.39 | 0.005381 | 0.999105 |
| <i>Olf3</i>    | olfactory receptor 3                                                                   | 1.39 | 0.015746 | 0.999105 |
| <i>Ubap2l</i>  | ubiquitin-associated protein 2-like                                                    | 1.39 | 0.031572 | 0.999105 |



|                    |                                                                                         |      |          |          |
|--------------------|-----------------------------------------------------------------------------------------|------|----------|----------|
| <i>Chrna9</i>      | cholinergic receptor, nicotinic, alpha polypeptide 9                                    | 1.39 | 0.029877 | 0.999105 |
| <i>Tmprss2</i>     | transmembrane protease, serine 2                                                        | 1.39 | 0.036391 | 0.999105 |
| <i>D17H6S56E-5</i> | DNA segment, Chr 17, human D6S56E 5                                                     | 1.39 | 0.017262 | 0.999105 |
| <i>Nt5e</i>        | 5 nucleotidase, ecto; 5' nucleotidase, ecto                                             | 1.4  | 0.043833 | 0.999105 |
| <i>Fam210a</i>     | family with sequence similarity 210, member A; microRNA 7219                            | 1.4  | 0.047589 | 0.999105 |
| <i>Cops4</i>       | COP9 (constitutive photomorphogenic) homolog, subunit 4 ( <i>Arabidopsis thaliana</i> ) | 1.4  | 0.037161 | 0.999105 |
| <i>Mgp</i>         | matrix Gla protein                                                                      | 1.4  | 0.037708 | 0.999105 |
| <i>Zfp444</i>      | zinc finger protein 444                                                                 | 1.4  | 0.041602 | 0.999105 |
| <i>Zp2</i>         | zona pellucida glycoprotein 2                                                           | 1.4  | 0.032353 | 0.999105 |
| <i>Pdlim2</i>      | PDZ and LIM domain 2                                                                    | 1.4  | 0.042693 | 0.999105 |
| <i>Tmprss6</i>     | transmembrane serine protease 6                                                         | 1.4  | 0.033071 | 0.999105 |
| <i>Olf1446</i>     | olfactory receptor 1446                                                                 | 1.4  | 0.045591 | 0.999105 |
| <i>Ivns1abp</i>    | influenza virus NS1A binding protein                                                    | 1.41 | 0.046689 | 0.999105 |
| <i>Rspo3</i>       | R-spondin 3                                                                             | 1.41 | 0.037687 | 0.999105 |
| <i>Zfp963</i>      | zinc finger protein 963; zinc finger protein 866                                        | 1.41 | 0.000017 | 0.190864 |
| <i>Kras</i>        | v-Ki-ras2 Kirsten rat sarcoma viral oncogene homolog                                    | 1.41 | 0.013261 | 0.999105 |
| <i>Hat1</i>        | histone aminotransferase 1                                                              | 1.41 | 0.023722 | 0.999105 |
| <i>Rrnad1</i>      | ribosomal RNA adenine dimethylase domain containing 1                                   | 1.41 | 0.01138  | 0.999105 |
| <i>Ino80c</i>      | INO80 complex subunit C                                                                 | 1.41 | 0.006278 | 0.999105 |
| <i>Xkr8</i>        | X Kell blood group precursor related family member 8 homolog                            | 1.41 | 0.034224 | 0.999105 |
| <i>AI429214</i>    | expressed sequence AI429214                                                             | 1.41 | 0.047753 | 0.999105 |
| <i>Rora</i>        | RAR-related orphan receptor alpha                                                       | 1.42 | 0.02795  | 0.999105 |
| <i>Abcb4</i>       | ATP-binding cassette, sub-family B (MDR/TAP), member 4                                  | 1.42 | 0.001089 | 0.822518 |
| <i>Isg20l2</i>     | interferon stimulated exonuclease gene 20-like 2                                        | 1.42 | 0.00453  | 0.999105 |
| <i>Fam210b</i>     | family with sequence similarity 210, member B                                           | 1.42 | 0.037507 | 0.999105 |
| <i>Ccdc129</i>     | coiled-coil domain containing 129                                                       | 1.42 | 0.013371 | 0.999105 |
| <i>Hk3</i>         | hexokinase 3                                                                            | 1.42 | 0.048018 | 0.999105 |
| <i>Rxfp4</i>       | relaxin family peptide receptor 4                                                       | 1.42 | 0.026964 | 0.999105 |
| <i>Cdh5</i>        | cadherin 5                                                                              | 1.42 | 0.000094 | 0.386862 |
| <i>Trim7</i>       | tripartite motif-containing 7                                                           | 1.42 | 0.017883 | 0.999105 |
| <i>Zfp711</i>      | zinc finger protein 711                                                                 | 1.43 | 0.009332 | 0.999105 |

|                 |                                                                    |      |          |          |
|-----------------|--------------------------------------------------------------------|------|----------|----------|
| <i>Slc6a20a</i> | solute carrier family 6 (neurotransmitter transporter), member 20A | 1.43 | 0.047848 | 0.999105 |
| <i>Tmem88</i>   | transmembrane protein 88                                           | 1.43 | 0.048094 | 0.999105 |
| <i>Gabra1</i>   | gamma-aminobutyric acid (GABA) A receptor, subunit alpha 1         | 1.44 | 0.03238  | 0.999105 |
| <i>Tmem74</i>   | transmembrane protein 74                                           | 1.44 | 0.012271 | 0.999105 |
|                 | <i>7-Mar</i> membrane-associated ring finger (C3HC4) 7             | 1.44 | 0.02982  | 0.999105 |
| <i>Lce3c</i>    | late cornified envelope 3C                                         | 1.44 | 0.007423 | 0.999105 |
| <i>Nme4</i>     | NME/NM23 nucleoside diphosphate kinase 4                           | 1.44 | 0.022423 | 0.999105 |
| <i>Oxt</i>      | oxytocin                                                           | 1.44 | 0.011688 | 0.999105 |
| <i>AI427809</i> | expressed sequence AI427809                                        | 1.44 | 0.021256 | 0.999105 |
| <i>Calu</i>     | calumenin                                                          | 1.44 | 0.029307 | 0.999105 |
| <i>Syt16</i>    | synaptotagmin XVI                                                  | 1.45 | 0.009312 | 0.999105 |
| <i>Plpp6</i>    | phospholipid phosphatase 6                                         | 1.45 | 0.034059 | 0.999105 |
| <i>Fli1</i>     | Friend leukemia integration 1                                      | 1.45 | 0.048809 | 0.999105 |
| <i>Nes</i>      | nestin                                                             | 1.45 | 0.03579  | 0.999105 |
| <i>Gpr174</i>   | G protein-coupled receptor 174                                     | 1.45 | 0.037911 | 0.999105 |
| <i>Fam83g</i>   | family with sequence similarity 83, member G                       | 1.45 | 0.045909 | 0.999105 |
| <i>Vps50</i>    | VPS50 EARP/GARPII complex subunit                                  | 1.46 | 0.02784  | 0.999105 |
| <i>Ttl3</i>     | tubulin tyrosine ligase-like family, member 3                      | 1.47 | 0.000028 | 0.206814 |
| <i>Yes1</i>     | Yamaguchi sarcoma viral (v-yes) oncogene homolog 1                 | 1.47 | 0.035702 | 0.999105 |
| <i>Stam2</i>    | signal transducing adaptor molecule (SH3 domain and ITAM motif) 2  | 1.47 | 0.035523 | 0.999105 |
| <i>Nup107</i>   | nucleoporin 107                                                    | 1.47 | 0.046587 | 0.999105 |
| <i>Scgb1b24</i> | secretoglobin, family 1B, member 24                                | 1.47 | 0.015911 | 0.999105 |
| <i>AU019823</i> | expressed sequence AU019823                                        | 1.47 | 0.030991 | 0.999105 |
| <i>Abca9</i>    | ATP-binding cassette, sub-family A (ABC1), member 9                | 1.47 | 0.017561 | 0.999105 |
| <i>Zfp119b</i>  | zinc finger protein 119b                                           | 1.47 | 0.005386 | 0.999105 |
| <i>Sis</i>      | sucrase isomaltase (alpha-glucosidase)                             | 1.48 | 0.011596 | 0.999105 |
| <i>Slco4a1</i>  | solute carrier organic anion transporter family, member 4a1        | 1.49 | 0.001969 | 0.999105 |
| <i>Myliip</i>   | myosin regulatory light chain interacting protein                  | 1.49 | 0.0197   | 0.999105 |
| <i>Tex30</i>    | testis expressed 30                                                | 1.49 | 0.026537 | 0.999105 |
| <i>Olf432</i>   | olfactory receptor 432                                             | 1.49 | 0.025152 | 0.999105 |

|                 |                                                                                                                                        |      |          |          |
|-----------------|----------------------------------------------------------------------------------------------------------------------------------------|------|----------|----------|
| <i>Mrgprx1</i>  | MAS-related GPR, member X1                                                                                                             | 1.49 | 0.039875 | 0.999105 |
| <i>Liph</i>     | lipase, member H                                                                                                                       | 1.5  | 0.012731 | 0.999105 |
| <i>Sprr2k</i>   | small proline-rich protein 2K                                                                                                          | 1.5  | 0.031837 | 0.999105 |
| <i>Vmn1r126</i> | vomeronasal 1 receptor 126                                                                                                             | 1.5  | 0.027015 | 0.999105 |
| <i>Ssbp2</i>    | single-stranded DNA binding protein 2                                                                                                  | 1.51 | 0.004727 | 0.999105 |
| <i>Vmn2r96</i>  | vomeronasal 2, receptor 96                                                                                                             | 1.51 | 0.035719 | 0.999105 |
| <i>C87977</i>   | expressed sequence C87977                                                                                                              | 1.51 | 0.006375 | 0.999105 |
| <i>Nkd1</i>     | naked cuticle 1 homolog (Drosophila)<br>spermatogenesis associated multipass<br>transmembrane protein 2; RIKEN cDNA<br>4930524N10 gene | 1.51 | 0.001308 | 0.907752 |
| <i>Samt2</i>    | 4930524N10 gene                                                                                                                        | 1.51 | 0.035744 | 0.999105 |
| <i>Car7</i>     | carbonic anhydrase 7                                                                                                                   | 1.52 | 0.035774 | 0.999105 |
| <i>Cdh10</i>    | cadherin 10                                                                                                                            | 1.52 | 0.030229 | 0.999105 |
| <i>Zfp677</i>   | zinc finger protein 677                                                                                                                | 1.52 | 0.034887 | 0.999105 |
| <i>Zmat4</i>    | zinc finger, matrin type 4                                                                                                             | 1.53 | 0.035802 | 0.999105 |
| <i>Pcdhb3</i>   | protocadherin beta 3                                                                                                                   | 1.53 | 0.018946 | 0.999105 |
| <i>Lpar6</i>    | lysophosphatidic acid receptor 6                                                                                                       | 1.53 | 0.039467 | 0.999105 |
| <i>Crhbp</i>    | corticotropin releasing hormone binding protein                                                                                        | 1.54 | 0.01549  | 0.999105 |
| <i>Glt8d2</i>   | glycosyltransferase 8 domain containing 2                                                                                              | 1.54 | 0.024972 | 0.999105 |
| <i>Pcdhb7</i>   | protocadherin beta 7                                                                                                                   | 1.54 | 0.003498 | 0.999105 |
| <i>Impad1</i>   | inositol monophosphatase domain containing 1                                                                                           | 1.54 | 0.020294 | 0.999105 |
| <i>Nox1</i>     | NADPH oxidase 1                                                                                                                        | 1.54 | 0.012199 | 0.999105 |
| <i>Decr1</i>    | 2,4-dienoyl CoA reductase 1, mitochondrial                                                                                             | 1.55 | 0.042079 | 0.999105 |
| <i>Rpap1</i>    | RNA polymerase II associated protein 1                                                                                                 | 1.56 | 0.020633 | 0.999105 |
| <i>Pidd1</i>    | p53 induced death domain protein 1                                                                                                     | 1.56 | 0.007941 | 0.999105 |
| <i>Cpne8</i>    | copine VIII                                                                                                                            | 1.57 | 0.017209 | 0.999105 |
| <i>Supt16</i>   | suppressor of Ty 16                                                                                                                    | 1.57 | 0.028373 | 0.999105 |
| <i>Tex12</i>    | testis expressed gene 12                                                                                                               | 1.57 | 0.02441  | 0.999105 |
| <i>Vwa5a</i>    | von Willebrand factor A domain containing 5A                                                                                           | 1.58 | 0.027123 | 0.999105 |
| <i>Uaca</i>     | uveal autoantigen with coiled-coil domains and<br>ankyrin repeats                                                                      | 1.58 | 0.033118 | 0.999105 |
| <i>Zfp459</i>   | zinc finger protein 459                                                                                                                | 1.58 | 0.010298 | 0.999105 |
| <i>Erg</i>      | avian erythroblastosis virus E-26 (v-ets) oncogene<br>related                                                                          | 1.58 | 0.027642 | 0.999105 |
| <i>Zfp90</i>    | zinc finger protein 90                                                                                                                 | 1.59 | 0.029067 | 0.999105 |
| <i>Bgn</i>      | biglycan                                                                                                                               | 1.59 | 0.00034  | 0.629305 |
| <i>Mal2</i>     | mal, T cell differentiation protein 2                                                                                                  | 1.6  | 0.036319 | 0.999105 |

|                  |                                                                     |      |          |          |
|------------------|---------------------------------------------------------------------|------|----------|----------|
| <i>Ceacam10</i>  | carcinoembryonic antigen-related cell adhesion molecule 10          | 1.6  | 0.001771 | 0.999105 |
| <i>Olf1297</i>   | olfactory receptor 1297                                             | 1.6  | 0.031664 | 0.999105 |
| <i>Gsap</i>      | gamma-secretase activating protein                                  | 1.62 | 0.041655 | 0.999105 |
| <i>Hcn1</i>      | hyperpolarization-activated, cyclic nucleotide-gated K+ 1           | 1.63 | 0.034576 | 0.999105 |
| <i>Abcc9</i>     | ATP-binding cassette, sub-family C (CFTR/MRP), member 9             | 1.63 | 0.000689 | 0.742883 |
| <i>Cd34</i>      | CD34 antigen                                                        | 1.64 | 0.023765 | 0.999105 |
| <i>Armc6</i>     | armadillo repeat containing 6                                       | 1.64 | 0.042372 | 0.999105 |
| <i>Mfsd3</i>     | major facilitator superfamily domain containing 3                   | 1.64 | 0.013979 | 0.999105 |
| <i>Vmn1r223</i>  | vomer nasal 1 receptor 223                                          | 1.64 | 0.04829  | 0.999105 |
| <i>Hcrtr2</i>    | hypocretin (orexin) receptor 2                                      | 1.65 | 0.005704 | 0.999105 |
| <i>Cst11</i>     | cystatin-like 1                                                     | 1.65 | 0.03324  | 0.999105 |
| <i>Rpia</i>      | ribose 5-phosphate isomerase A                                      | 1.66 | 0.002296 | 0.999105 |
| <i>Tmem211</i>   | transmembrane protein 211                                           | 1.66 | 0.011708 | 0.999105 |
| <i>Ccdc88c</i>   | coiled-coil domain containing 88C                                   | 1.67 | 0.045019 | 0.999105 |
| <i>Pcdhb2</i>    | protocadherin beta 2                                                | 1.69 | 0.002361 | 0.999105 |
| <i>Lrp2bp</i>    | Lrp2 binding protein                                                | 1.7  | 0.045288 | 0.999105 |
| <i>Lamp5</i>     | lysosomal-associated membrane protein family, member 5              | 1.71 | 0.037308 | 0.999105 |
| <i>Msr3b3</i>    | methionine sulfoxide reductase B3                                   | 1.73 | 0.036282 | 0.999105 |
| <i>Serpinb1b</i> | serine (or cysteine) peptidase inhibitor, clade B, member 1b        | 1.74 | 0.024245 | 0.999105 |
| <i>Vmn1r101</i>  | vomer nasal 1 receptor 101                                          | 1.74 | 0.008089 | 0.999105 |
| <i>Arl14ep1</i>  | ADP-ribosylation factor-like 14 effector protein-like               | 1.74 | 0.039052 | 0.999105 |
| <i>Fbn2</i>      | fibrillin 2                                                         | 1.74 | 0.026562 | 0.999105 |
| <i>Plau</i>      | plasminogen activator, urokinase                                    | 1.75 | 0.017072 | 0.999105 |
| <i>Pramef6</i>   | PRAME family member 6                                               | 1.75 | 0.030639 | 0.999105 |
| <i>Zkscan4</i>   | zinc finger with KRAB and SCAN domains 4                            | 1.79 | 0.017689 | 0.999105 |
| <i>Manea</i>     | mannosidase, endo-alpha                                             | 1.83 | 0.005605 | 0.999105 |
| <i>Pth2r</i>     | parathyroid hormone 2 receptor                                      | 1.84 | 0.01912  | 0.999105 |
| <i>Egr2</i>      | early growth response 2                                             | 1.87 | 0.047209 | 0.999105 |
| <i>Odam</i>      | odontogenic, ameloblast associated                                  | 1.88 | 0.008739 | 0.999105 |
| <i>Mlip</i>      | muscular LMNA-interacting protein                                   | 1.97 | 0.002434 | 0.999105 |
| <i>Tas2r105</i>  | taste receptor, type 2, member 105                                  | 1.97 | 0.047217 | 0.999105 |
| <i>Gnb4</i>      | guanine nucleotide binding protein (G protein), beta 4              | 1.99 | 0.005437 | 0.999105 |
| <i>Khdrbs2</i>   | KH domain containing, RNA binding, signal transduction associated 2 | 2.08 | 0.032877 | 0.999105 |

|               |                                                                                           |      |          |          |
|---------------|-------------------------------------------------------------------------------------------|------|----------|----------|
| <i>Chsy3</i>  | chondroitin sulfate synthase 3                                                            | 2.3  | 0.04444  | 0.999105 |
| <i>Fmod</i>   | fibromodulin                                                                              | 2.44 | 0.045175 | 0.999105 |
| <i>Sema3a</i> | sema domain, immunoglobulin domain (Ig), short<br>basic domain, secreted, (semaphorin) 3A | 2.54 | 0.035903 | 0.999105 |

---

**Table S5- Genes downregulated in the Hippocampus of Ala92-Dio2 mice. (p<0.05)**

| <b>Gene Symbol</b> | <b>Description</b>                                                                                                  | <b>Fold Change (linear) (AA HC vs. TT HC)</b> | <b>ANOVA p-value (AA HC vs. TT HC)</b> | <b>FDR p-value (AA HC vs. TT HC)</b> |
|--------------------|---------------------------------------------------------------------------------------------------------------------|-----------------------------------------------|----------------------------------------|--------------------------------------|
| <i>Zic1</i>        | zinc finger protein of the cerebellum 1                                                                             | -7.81                                         | 0.027729                               | 0.999105                             |
| <i>Calb2</i>       | calbindin 2                                                                                                         | -3.38                                         | 0.002918                               | 0.999105                             |
| <i>Mid1</i>        | midline 1                                                                                                           | -2.72                                         | 0.029202                               | 0.999105                             |
| <i>Mid1</i>        | midline 1                                                                                                           | -2.72                                         | 0.029202                               | 0.999105                             |
| <i>Zic3</i>        | zinc finger protein of the cerebellum 3                                                                             | -2.43                                         | 0.015394                               | 0.999105                             |
| <i>Mid1</i>        | midline 1                                                                                                           | -2.41                                         | 0.009703                               | 0.999105                             |
| <i>Rnf17</i>       | ring finger protein 17                                                                                              | -2.34                                         | 0.003132                               | 0.999105                             |
| <i>H2-Ke6</i>      | H2-K region expressed gene 6                                                                                        | -2.18                                         | 0.018676                               | 0.999105                             |
| <i>Vangl1</i>      | vang-like 1 (van gogh, Drosophila)                                                                                  | -2.16                                         | 0.01166                                | 0.999105                             |
| <i>Vmn2r71</i>     | vomer nasal 2, receptor 71                                                                                          | -2.15                                         | 0.037342                               | 0.999105                             |
| <i>Zic5</i>        | zinc finger protein of the cerebellum 5                                                                             | -2.11                                         | 0.015156                               | 0.999105                             |
| <i>Mup-ps19</i>    | major urinary protein, pseudogene 19;<br>major urinary protein 20                                                   | -2.03                                         | 0.027245                               | 0.999105                             |
| <i>Mroh1</i>       | maestro heat-like repeat family member 1;<br>microRNA 6954                                                          | -2.01                                         | 0.043927                               | 0.999105                             |
| <i>Cpne9</i>       | copine family member IX                                                                                             | -2                                            | 0.031405                               | 0.999105                             |
| <i>Slc9c1</i>      | solute carrier family 9, subfamily C (Na <sup>+</sup> -<br>transporting carboxylic acid decarboxylase),<br>member 1 | -1.98                                         | 0.003128                               | 0.999105                             |
| <i>Olf1204</i>     | olfactory receptor 1204                                                                                             | -1.96                                         | 0.0418                                 | 0.999105                             |
| <i>Fabp7</i>       | fatty acid binding protein 7, brain                                                                                 | -1.95                                         | 0.002318                               | 0.999105                             |
| <i>Fam78a</i>      | family with sequence similarity 78, member<br>A                                                                     | -1.9                                          | 0.04978                                | 0.999105                             |
| <i>Cyp2a12</i>     | cytochrome P450, family 2, subfamily a,<br>polypeptide 12                                                           | -1.83                                         | 0.047101                               | 0.999105                             |
| <i>Ehd1</i>        | EH-domain containing 1                                                                                              | -1.82                                         | 0.037447                               | 0.999105                             |

|                  |                                                                               |       |          |          |
|------------------|-------------------------------------------------------------------------------|-------|----------|----------|
| <i>Olf1220</i>   | olfactory receptor 1220                                                       | -1.82 | 0.011884 | 0.999105 |
| <i>Prkcd</i>     | protein kinase C, delta                                                       | -1.8  | 0.045911 | 0.999105 |
| <i>Eomes</i>     | eomesodermin homolog (Xenopus laevis)                                         | -1.8  | 0.000953 | 0.822518 |
| <i>Trmt1</i>     | tRNA methyltransferase 1                                                      | -1.76 | 0.002633 | 0.999105 |
| <i>Stard6</i>    | StAR-related lipid transfer (START) domain containing 6                       | -1.74 | 0.004528 | 0.999105 |
| <i>Olf1496</i>   | olfactory receptor 1496                                                       | -1.74 | 0.015523 | 0.999105 |
| <i>Elmsan1</i>   | ELM2 and Myb/SANT-like domain containing 1                                    | -1.73 | 0.027274 | 0.999105 |
| <i>Il1rl1</i>    | interleukin 1 receptor-like 1                                                 | -1.73 | 0.034868 | 0.999105 |
| <i>Ube2t</i>     | ubiquitin-conjugating enzyme E2T (putative)                                   | -1.71 | 0.029326 | 0.999105 |
| <i>Mme11</i>     | membrane metallo-endopeptidase-like 1                                         | -1.7  | 0.014589 | 0.999105 |
| <i>Smpd2</i>     | sphingomyelin phosphodiesterase 2, neutral                                    | -1.7  | 0.018614 | 0.999105 |
| <i>Hist1h3f</i>  | histone cluster 1, H3f                                                        | -1.7  | 0.037879 | 0.999105 |
| <i>Olf611</i>    | olfactory receptor 611                                                        | -1.69 | 0.044445 | 0.999105 |
| <i>Srp14</i>     | signal recognition particle 14                                                | -1.69 | 0.000651 | 0.742883 |
| <i>Gdf11</i>     | growth differentiation factor 11                                              | -1.68 | 0.017512 | 0.999105 |
| <i>Pop5</i>      | processing of precursor 5, ribonuclease P/MRP family ( <i>S. cerevisiae</i> ) | -1.68 | 0.018646 | 0.999105 |
| <i>Ifnb1</i>     | interferon beta 1, fibroblast                                                 | -1.68 | 0.03055  | 0.999105 |
| <i>Olf1225</i>   | olfactory receptor 1225                                                       | -1.66 | 0.001283 | 0.907752 |
| <i>Tspan1</i>    | tetraspanin 1                                                                 | -1.66 | 0.029584 | 0.999105 |
| <i>Dmrtc1b</i>   | DMRT-like family C1b                                                          | -1.66 | 0.033086 | 0.999105 |
| <i>Taf4a</i>     | TAF4A RNA polymerase II, TATA box binding protein (TBP)-associated factor     | -1.65 | 0.022702 | 0.999105 |
| <i>Olf75-ps1</i> | olfactory receptor 75, pseudogene 1                                           | -1.65 | 0.018504 | 0.999105 |
| <i>Olf836</i>    | olfactory receptor 836                                                        | -1.65 | 0.035781 | 0.999105 |

|                  |                                                                                             |       |          |          |
|------------------|---------------------------------------------------------------------------------------------|-------|----------|----------|
| <i>Nsun2</i>     | NOL1/NOP2/Sun domain family member 2                                                        | -1.64 | 0.03373  | 0.999105 |
| <i>Ppip5k1</i>   | diphosphoinositol pentakisphosphate kinase 1                                                | -1.63 | 0.044381 | 0.999105 |
| <i>Klrg2</i>     | killer cell lectin-like receptor subfamily G, member 2                                      | -1.62 | 0.009135 | 0.999105 |
| <i>Nudt16l1</i>  | nudix (nucleoside diphosphate linked moiety X)-type motif 16-like 1                         | -1.61 | 0.007372 | 0.999105 |
| <i>Tradd</i>     | TNFRSF1A-associated via death domain                                                        | -1.61 | 0.035493 | 0.999105 |
| <i>Gpr149</i>    | G protein-coupled receptor 149                                                              | -1.6  | 0.026551 | 0.999105 |
| <i>Atp5j2</i>    | ATP synthase, H <sup>+</sup> transporting, mitochondrial F <sub>0</sub> complex, subunit F2 | -1.6  | 0.026303 | 0.999105 |
| <i>Zfp936</i>    | zinc finger protein 936                                                                     | -1.59 | 0.024284 | 0.999105 |
| <i>Nans</i>      | N-acetylneuraminic acid synthase (sialic acid synthase)                                     | -1.59 | 0.011334 | 0.999105 |
| <i>Vmn1r157</i>  | vomeronal 1 receptor 157                                                                    | -1.59 | 0.044659 | 0.999105 |
| <i>Olf1034</i>   | olfactory receptor 1034                                                                     | -1.59 | 0.008704 | 0.999105 |
| <i>Adck4</i>     | aarF domain containing kinase 4                                                             | -1.58 | 0.038314 | 0.999105 |
| <i>Serpina1c</i> | serine (or cysteine) peptidase inhibitor, clade A, member 1C                                | -1.58 | 0.001003 | 0.822518 |
| <i>Prl3d3</i>    | prolactin family 3, subfamily d, member 3                                                   | -1.58 | 0.006853 | 0.999105 |
| <i>Ptger2</i>    | prostaglandin E receptor 2 (subtype EP2)                                                    | -1.57 | 0.020218 | 0.999105 |
| <i>Esp31</i>     | exocrine gland secreted peptide 31                                                          | -1.57 | 0.022794 | 0.999105 |
| <i>Sall2</i>     | sal-like 2 (Drosophila)                                                                     | -1.56 | 0.029249 | 0.999105 |
| <i>Kank3</i>     | KN motif and ankyrin repeat domains 3                                                       | -1.55 | 0.020767 | 0.999105 |
| <i>Olf628</i>    | olfactory receptor 628                                                                      | -1.55 | 0.027603 | 0.999105 |
| <i>Dbn1</i>      | drebrin 1                                                                                   | -1.54 | 0.018663 | 0.999105 |



|                |                                                                       |       |          |          |
|----------------|-----------------------------------------------------------------------|-------|----------|----------|
| <i>Baat</i>    | bile acid-Coenzyme A: amino acid N-acyltransferase                    | -1.54 | 0.005833 | 0.999105 |
| <i>Olf1206</i> | olfactory receptor 1206                                               | -1.54 | 0.02383  | 0.999105 |
| <i>Tmub1</i>   | transmembrane and ubiquitin-like domain containing 1                  | -1.54 | 0.042108 | 0.999105 |
| <i>Olf930</i>  | olfactory receptor 930                                                | -1.54 | 0.027061 | 0.999105 |
| <i>Lrrc18</i>  | leucine rich repeat containing 18                                     | -1.54 | 0.021484 | 0.999105 |
| <i>Grid2ip</i> | glutamate receptor, ionotropic, delta 2 (Grid2) interacting protein 1 | -1.53 | 0.029263 | 0.999105 |
| <i>Mybl2</i>   | myeloblastosis oncogene-like 2                                        | -1.53 | 0.008357 | 0.999105 |
| <i>Olf1271</i> | olfactory receptor 1271                                               | -1.53 | 0.049732 | 0.999105 |
| <i>Rhox13</i>  | reproductive homeobox 13                                              | -1.53 | 0.037246 | 0.999105 |
| <i>Olf1316</i> | olfactory receptor 1316                                               | -1.52 | 0.029984 | 0.999105 |
| <i>Spin2d</i>  | spindlin family, member 2D                                            | -1.52 | 0.006816 | 0.999105 |
| <i>Rpl11</i>   | ribosomal protein L11                                                 | -1.52 | 0.034553 | 0.999105 |
| <i>Osbp17</i>  | oxysterol binding protein-like 7                                      | -1.51 | 0.031434 | 0.999105 |
| <i>Tmem14c</i> | transmembrane protein 14C                                             | -1.51 | 0.000694 | 0.742883 |
| <i>C4bp</i>    | complement component 4 binding protein                                | -1.51 | 0.048732 | 0.999105 |
| <i>Rasl2-9</i> | RAS-like, family 2, locus 9                                           | -1.51 | 0.047846 | 0.999105 |
| <i>Elp6</i>    | elongator acetyltransferase complex subunit 6                         | -1.51 | 0.017272 | 0.999105 |
| <i>Adarb1</i>  | adenosine deaminase, RNA-specific, B1                                 | -1.5  | 0.00877  | 0.999105 |
| <i>Rab3ip</i>  | RAB3A interacting protein                                             | -1.5  | 0.03695  | 0.999105 |
| <i>Rangrf</i>  | RAN guanine nucleotide release factor                                 | -1.5  | 0.032943 | 0.999105 |
| <i>Commd9</i>  | COMM domain containing 9                                              | -1.5  | 0.007656 | 0.999105 |
| <i>Popdc2</i>  | popeye domain containing 2                                            | -1.5  | 0.007976 | 0.999105 |

|                 |                                                                                        |       |          |          |
|-----------------|----------------------------------------------------------------------------------------|-------|----------|----------|
| <i>Sema3g</i>   | sema domain, immunoglobulin domain (Ig), short basic domain, secreted, (semaphorin) 3G | -1.49 | 0.00471  | 0.999105 |
| <i>Il23r</i>    | interleukin 23 receptor                                                                | -1.49 | 0.021998 | 0.999105 |
| <i>Olfr478</i>  | olfactory receptor 478                                                                 | -1.49 | 0.020413 | 0.999105 |
| <i>Clmn</i>     | calmin                                                                                 | -1.48 | 0.015641 | 0.999105 |
| <i>Gpnmb</i>    | glycoprotein (transmembrane) nmb                                                       | -1.48 | 0.003577 | 0.999105 |
| <i>Ak2</i>      | adenylate kinase 2                                                                     | -1.48 | 0.000008 | 0.180798 |
| <i>Olfr1094</i> | olfactory receptor 1094                                                                | -1.48 | 0.021136 | 0.999105 |
| <i>Dpm3</i>     | dolichyl-phosphate mannosyltransferase polypeptide 3                                   | -1.48 | 0.020912 | 0.999105 |
| <i>Olfr266</i>  | olfactory receptor 266                                                                 | -1.48 | 0.041102 | 0.999105 |
| <i>Cib4</i>     | calcium and integrin binding family member 4                                           | -1.48 | 0.044819 | 0.999105 |
| <i>Zfp865</i>   | zinc finger protein 865                                                                | -1.48 | 0.046921 | 0.999105 |
| <i>Padi2</i>    | peptidyl arginine deiminase, type II                                                   | -1.47 | 0.010193 | 0.999105 |
| <i>Plcd4</i>    | phospholipase C, delta 4                                                               | -1.47 | 0.01515  | 0.999105 |
| <i>Tbx6</i>     | T-box 6                                                                                | -1.47 | 0.014637 | 0.999105 |
| <i>Olfr1049</i> | olfactory receptor 1049                                                                | -1.47 | 0.038941 | 0.999105 |
| <i>Spint3</i>   | serine peptidase inhibitor, Kunitz type, 3                                             | -1.47 | 0.00326  | 0.999105 |
| <i>Olfr18</i>   | olfactory receptor 18                                                                  | -1.47 | 0.046789 | 0.999105 |
| <i>Syt13</i>    | synaptotagmin-like 3                                                                   | -1.47 | 0.014868 | 0.999105 |
| <i>S100b</i>    | S100 protein, beta polypeptide, neural                                                 | -1.46 | 0.037669 | 0.999105 |
| <i>Slc27a5</i>  | solute carrier family 27 (fatty acid transporter), member 5                            | -1.46 | 0.04753  | 0.999105 |
| <i>Cdc25a</i>   | cell division cycle 25A                                                                | -1.45 | 0.017739 | 0.999105 |
| <i>Top1mt</i>   | DNA topoisomerase 1, mitochondrial                                                     | -1.45 | 0.022521 | 0.999105 |
| <i>Tiam1</i>    | T cell lymphoma invasion and metastasis 1                                              | -1.45 | 0.002166 | 0.999105 |
| <i>Trh</i>      | thyrotropin releasing hormone                                                          | -1.45 | 0.047079 | 0.999105 |
| <i>Acly</i>     | ATP citrate lyase                                                                      | -1.45 | 0.019457 | 0.999105 |
| <i>Cot11</i>    | coactosin-like 1 (Dictyostelium)                                                       | -1.45 | 0.043356 | 0.999105 |

|                 |                                                                                             |       |          |          |
|-----------------|---------------------------------------------------------------------------------------------|-------|----------|----------|
| <i>Tex19.2</i>  | testis expressed gene 19.2                                                                  | -1.45 | 0.018411 | 0.999105 |
| <i>Kndc1</i>    | kinase non-catalytic C-lobe domain (KIND) containing 1                                      | -1.44 | 0.033989 | 0.999105 |
| <i>Gusb</i>     | glucuronidase, beta                                                                         | -1.44 | 0.002055 | 0.999105 |
| <i>Rnh1</i>     | ribonuclease/angiogenin inhibitor 1                                                         | -1.44 | 0.036584 | 0.999105 |
| <i>Ifrd2</i>    | interferon-related developmental regulator 2                                                | -1.44 | 0.02285  | 0.999105 |
| <i>Tmem189</i>  | transmembrane protein 189                                                                   | -1.44 | 0.032032 | 0.999105 |
| <i>Slc25a28</i> | solute carrier family 25, member 28                                                         | -1.44 | 0.007612 | 0.999105 |
| <i>Tmem210</i>  | transmembrane protein 210                                                                   | -1.44 | 0.015434 | 0.999105 |
| <i>Olf1226</i>  | olfactory receptor 1226                                                                     | -1.44 | 0.029545 | 0.999105 |
| <i>Ssxb8</i>    | synovial sarcoma, X member B, breakpoint 8                                                  | -1.44 | 0.019221 | 0.999105 |
| <i>Fam181b</i>  | family with sequence similarity 181, member B                                               | -1.43 | 0.010218 | 0.999105 |
| <i>Adam8</i>    | a disintegrin and metallopeptidase domain 8                                                 | -1.43 | 0.040189 | 0.999105 |
| <i>Defa1</i>    | defensin, alpha 1                                                                           | -1.43 | 0.037433 | 0.999105 |
| <i>Ccdc134</i>  | coiled-coil domain containing 134                                                           | -1.42 | 0.021618 | 0.999105 |
| <i>Olf484</i>   | olfactory receptor 484                                                                      | -1.42 | 0.007116 | 0.999105 |
| <i>Uchl1</i>    | ubiquitin carboxy-terminal hydrolase L1                                                     | -1.41 | 0.009087 | 0.999105 |
| <i>Slc10a4</i>  | solute carrier family 10 (sodium/bile acid cotransporter family), member 4                  | -1.41 | 0.047131 | 0.999105 |
| <i>Isl1</i>     | ISL1 transcription factor, LIM/homeodomain                                                  | -1.41 | 0.033311 | 0.999105 |
| <i>Arsj</i>     | arylsulfatase J                                                                             | -1.41 | 0.00917  | 0.999105 |
| <i>Enox2</i>    | ecto-NOX disulfide-thiol exchanger 2                                                        | -1.41 | 0.037927 | 0.999105 |
| <i>Ndufa13</i>  | NADH dehydrogenase (ubiquinone) 1 alpha subcomplex, 13; YjeF N-terminal domain containing 3 | -1.41 | 0.047618 | 0.999105 |

|                 |                                                                  |       |          |          |
|-----------------|------------------------------------------------------------------|-------|----------|----------|
| <i>B4galt5</i>  | UDP-Gal:betaGlcNAc beta 1,4-galactosyltransferase, polypeptide 5 | -1.41 | 0.03067  | 0.999105 |
| <i>Wbp1</i>     | WW domain binding protein 1                                      | -1.41 | 0.015431 | 0.999105 |
| <i>Vmn2r111</i> | vomer nasal 2, receptor 111                                      | -1.41 | 0.024077 | 0.999105 |
| <i>Klhl29</i>   | kelch-like 29                                                    | -1.4  | 0.005774 | 0.999105 |
| <i>Prr13</i>    | proline rich 13                                                  | -1.4  | 0.040889 | 0.999105 |
| <i>Rai2</i>     | retinoic acid induced 2                                          | -1.4  | 0.008146 | 0.999105 |
| <i>Lynx1</i>    | Ly6/neurotoxin 1                                                 | -1.4  | 0.004431 | 0.999105 |
| <i>Ppp1r35</i>  | protein phosphatase 1, regulatory subunit 35                     | -1.4  | 0.012405 | 0.999105 |
| <i>Asb1</i>     | ankyrin repeat and SOCS box-containing 1                         | -1.4  | 0.015065 | 0.999105 |
| <i>Olfr640</i>  | olfactory receptor 640                                           | -1.4  | 0.017308 | 0.999105 |
| <i>Nfya</i>     | nuclear transcription factor-Y alpha                             | -1.4  | 0.00444  | 0.999105 |
| <i>Olfr600</i>  | olfactory receptor 600                                           | -1.4  | 0.016358 | 0.999105 |
| <i>Mroh8</i>    | maestro heat-like repeat family member 8                         | -1.4  | 0.045166 | 0.999105 |
| <i>Khdc3</i>    | KH domain containing 3, subcortical maternal complex member      | -1.4  | 0.021582 | 0.999105 |
| <i>Ndufa2</i>   | NADH dehydrogenase (ubiquinone) 1 alpha subcomplex, 2            | -1.4  | 0.009963 | 0.999105 |
| <i>Grm1</i>     | glutamate receptor, metabotropic 1                               | -1.39 | 0.021151 | 0.999105 |
| <i>Cxxc5</i>    | CXXC finger 5                                                    | -1.39 | 0.001111 | 0.822518 |
| <i>Trnp1</i>    | TMF1-regulated nuclear protein 1                                 | -1.39 | 0.008358 | 0.999105 |
| <i>Slc29a1</i>  | solute carrier family 29 (nucleoside transporters), member 1     | -1.39 | 0.019031 | 0.999105 |
| <i>Anxa6</i>    | annexin A6                                                       | -1.39 | 0.025571 | 0.999105 |
| <i>Phgdh</i>    | 3-phosphoglycerate dehydrogenase                                 | -1.39 | 0.030175 | 0.999105 |
| <i>Gdpd3</i>    | glycerophosphodiester phosphodiesterase domain containing 3      | -1.39 | 0.015072 | 0.999105 |
| <i>Ndufs6</i>   | NADH dehydrogenase (ubiquinone) Fe-S protein 6                   | -1.39 | 0.038581 | 0.999105 |

|                 |                                                                                               |       |          |          |
|-----------------|-----------------------------------------------------------------------------------------------|-------|----------|----------|
| <i>Umps</i>     | uridine monophosphate synthetase                                                              | -1.39 | 0.018822 | 0.999105 |
| <i>Fam227b</i>  | family with sequence similarity 227, member B                                                 | -1.39 | 0.029318 | 0.999105 |
| <i>Olfir726</i> | olfactory receptor 726                                                                        | -1.39 | 0.044336 | 0.999105 |
| <i>Ndufb10</i>  | NADH dehydrogenase (ubiquinone) 1 beta subcomplex, 10                                         | -1.39 | 0.013133 | 0.999105 |
| <i>Dynll1</i>   | dynein light chain LC8-type 1                                                                 | -1.38 | 0.020507 | 0.999105 |
| <i>Rltpr</i>    | RGD motif, leucine rich repeats, tropomodulin domain and proline-rich containing              | -1.38 | 0.006222 | 0.999105 |
| <i>Plcb2</i>    | phospholipase C, beta 2                                                                       | -1.38 | 0.033401 | 0.999105 |
| <i>Dcaf5</i>    | DDB1 and CUL4 associated factor 5                                                             | -1.38 | 0.000272 | 0.571716 |
| <i>Polr2e</i>   | polymerase (RNA) II (DNA directed) polypeptide E                                              | -1.38 | 0.028097 | 0.999105 |
| <i>Il1f10</i>   | interleukin 1 family, member 10                                                               | -1.38 | 0.031547 | 0.999105 |
| <i>Cutal</i>    | cutA divalent cation tolerance homolog-like                                                   | -1.38 | 0.009368 | 0.999105 |
| <i>Slc45a4</i>  | solute carrier family 45, member 4                                                            | -1.38 | 0.0413   | 0.999105 |
| <i>Zfp13</i>    | zinc finger protein 13                                                                        | -1.38 | 0.01029  | 0.999105 |
| <i>Mc2r</i>     | melanocortin 2 receptor                                                                       | -1.38 | 0.025294 | 0.999105 |
| <i>Plcb3</i>    | phospholipase C, beta 3                                                                       | -1.37 | 0.002552 | 0.999105 |
| <i>Plch2</i>    | phospholipase C, eta 2                                                                        | -1.37 | 0.031744 | 0.999105 |
| <i>Atp6v1f</i>  | ATPase, H+ transporting, lysosomal V1 subunit F                                               | -1.37 | 0.005199 | 0.999105 |
| <i>Adamts9</i>  | a disintegrin-like and metallopeptidase (reprolysin type) with thrombospondin type 1 motif, 9 | -1.37 | 0.00675  | 0.999105 |
| <i>Psg18</i>    | pregnancy specific glycoprotein 18                                                            | -1.37 | 0.017006 | 0.999105 |
| <i>Zfp521</i>   | zinc finger protein 521                                                                       | -1.36 | 0.043108 | 0.999105 |
| <i>Cfp</i>      | complement factor properdin                                                                   | -1.36 | 0.042483 | 0.999105 |

|                 |                                                                            |       |          |          |
|-----------------|----------------------------------------------------------------------------|-------|----------|----------|
| <i>Sart3</i>    | squamous cell carcinoma antigen recognized by T cells 3                    | -1.36 | 0.04872  | 0.999105 |
| <i>Fam53a</i>   | family with sequence similarity 53, member A                               | -1.36 | 0.013054 | 0.999105 |
| <i>Hdac6</i>    | histone deacetylase 6                                                      | -1.36 | 0.044195 | 0.999105 |
| <i>Olfir689</i> | olfactory receptor 689                                                     | -1.36 | 0.006817 | 0.999105 |
| <i>Chmp4c</i>   | charged multivesicular body protein 4C                                     | -1.36 | 0.017506 | 0.999105 |
| <i>Ube2d2b</i>  | ubiquitin-conjugating enzyme E2D 2B                                        | -1.36 | 0.041604 | 0.999105 |
| <i>Cd19</i>     | CD19 antigen                                                               | -1.36 | 0.007646 | 0.999105 |
| <i>Elf4</i>     | E74-like factor 4 (ets domain transcription factor)                        | -1.36 | 0.015012 | 0.999105 |
| <i>Sp110</i>    | Sp110 nuclear body protein                                                 | -1.36 | 0.026624 | 0.999105 |
| <i>Hint1</i>    | histidine triad nucleotide binding protein 1                               | -1.36 | 0.000408 | 0.697304 |
| <i>Ndufa6</i>   | NADH dehydrogenase (ubiquinone) 1 alpha subcomplex, 6 (B14)                | -1.36 | 0.008837 | 0.999105 |
| <i>Metrn</i>    | meteorin, glial cell differentiation regulator                             | -1.35 | 0.033504 | 0.999105 |
| <i>Mical3</i>   | microtubule associated monooxygenase, calponin and LIM domain containing 3 | -1.35 | 0.001835 | 0.999105 |
| <i>Shf</i>      | Src homology 2 domain containing F                                         | -1.35 | 0.042749 | 0.999105 |
| <i>Rpl10</i>    | ribosomal protein L10; small nucleolar RNA, H/ACA box 70                   | -1.35 | 0.015881 | 0.999105 |
| <i>Nos1</i>     | nitric oxide synthase 1, neuronal                                          | -1.35 | 0.024222 | 0.999105 |
| <i>Pgs1</i>     | phosphatidylglycerophosphate synthase 1                                    | -1.35 | 0.00071  | 0.742883 |
| <i>Spata33</i>  | spermatogenesis associated 33                                              | -1.35 | 0.01991  | 0.999105 |
| <i>Anapc13</i>  | anaphase promoting complex subunit 13                                      | -1.35 | 0.016405 | 0.999105 |
| <i>Agtr1a</i>   | angiotensin II receptor, type 1a                                           | -1.35 | 0.005296 | 0.999105 |
| <i>Tfec</i>     | transcription factor EC                                                    | -1.35 | 0.02863  | 0.999105 |

|                |                                                                           |       |          |          |
|----------------|---------------------------------------------------------------------------|-------|----------|----------|
| <i>Chil3</i>   | chitinase-like 3                                                          | -1.35 | 0.037874 | 0.999105 |
| <i>Ly6g5c</i>  | lymphocyte antigen 6 complex, locus G5C                                   | -1.35 | 0.006143 | 0.999105 |
| <i>B3gat3</i>  | beta-1,3-glucuronyltransferase 3<br>(glucuronosyltransferase I)           | -1.35 | 0.030412 | 0.999105 |
| <i>Col3a1</i>  | collagen, type III, alpha 1                                               | -1.35 | 0.04495  | 0.999105 |
| <i>Akr7a5</i>  | aldo-keto reductase family 7, member A5<br>(aflatoxin aldehyde reductase) | -1.35 | 0.027937 | 0.999105 |
| <i>Wdr59</i>   | WD repeat domain 59                                                       | -1.35 | 0.032703 | 0.999105 |
| <i>Glb1l3</i>  | galactosidase, beta 1 like 3                                              | -1.35 | 0.039906 | 0.999105 |
| <i>Mageb5</i>  | melanoma antigen, family B, 5                                             | -1.35 | 0.011667 | 0.999105 |
| <i>Dnaja4</i>  | DnaJ (Hsp40) homolog, subfamily A,<br>member 4                            | -1.34 | 0.001533 | 0.999105 |
| <i>Hpd1</i>    | 4-hydroxyphenylpyruvate dioxygenase-like                                  | -1.34 | 0.030182 | 0.999105 |
| <i>Apex1</i>   | apurinic/aprimidinic endonuclease 1                                       | -1.34 | 0.009569 | 0.999105 |
| <i>Rps6kc1</i> | ribosomal protein S6 kinase polypeptide 1                                 | -1.34 | 0.021296 | 0.999105 |
| <i>Slc35b1</i> | solute carrier family 35, member B1                                       | -1.34 | 0.040809 | 0.999105 |
| <i>Ifi44l</i>  | interferon-induced protein 44 like                                        | -1.34 | 0.006731 | 0.999105 |
| <i>Arid5a</i>  | AT rich interactive domain 5A (MRF1-like)                                 | -1.34 | 0.031296 | 0.999105 |
| <i>Olr1</i>    | oxidized low density lipoprotein (lectin-like)<br>receptor 1              | -1.34 | 0.009868 | 0.999105 |
| <i>Apoa4</i>   | apolipoprotein A-IV                                                       | -1.34 | 0.033574 | 0.999105 |
| <i>Vmn2r89</i> | vomer nasal 2, receptor 89                                                | -1.34 | 0.04859  | 0.999105 |
| <i>St3gal1</i> | ST3 beta-galactoside alpha-2,3-<br>sialyltransferase 1                    | -1.33 | 0.03927  | 0.999105 |
| <i>Sesn1</i>   | sestrin 1                                                                 | -1.33 | 0.034165 | 0.999105 |
| <i>Psrc1</i>   | proline/serine-rich coiled-coil 1                                         | -1.33 | 0.049446 | 0.999105 |
| <i>Gyg</i>     | glycogenin                                                                | -1.33 | 0.025639 | 0.999105 |

|                |                                                                         |       |          |          |
|----------------|-------------------------------------------------------------------------|-------|----------|----------|
| <i>Mmp14</i>   | matrix metalloproteinase 14 (membrane-inserted)                         | -1.33 | 0.035436 | 0.999105 |
| <i>Snx29</i>   | sorting nexin 29                                                        | -1.33 | 0.002685 | 0.999105 |
| <i>Trim28</i>  | tripartite motif-containing 28                                          | -1.33 | 0.009541 | 0.999105 |
| <i>Sreb1</i>   | sterol regulatory element binding transcription factor 1; microRNA 6922 | -1.33 | 0.016206 | 0.999105 |
| <i>Bola1</i>   | bolA-like 1 (E. coli)                                                   | -1.33 | 0.046972 | 0.999105 |
| <i>Polr2j</i>  | polymerase (RNA) II (DNA directed) polypeptide J                        | -1.33 | 0.028094 | 0.999105 |
| <i>Krt23</i>   | keratin 23                                                              | -1.33 | 0.016354 | 0.999105 |
| <i>Nt5c3b</i>  | 5-nucleotidase, cytosolic IIIB; 5'-nucleotidase, cytosolic IIIB         | -1.33 | 0.027941 | 0.999105 |
| <i>Phpt1</i>   | phosphohistidine phosphatase 1                                          | -1.32 | 0.012116 | 0.999105 |
| <i>Fnip2</i>   | folliculin interacting protein 2                                        | -1.32 | 0.039282 | 0.999105 |
| <i>Gstm5</i>   | glutathione S-transferase, mu 5                                         | -1.32 | 0.040536 | 0.999105 |
| <i>Lrrc75b</i> | leucine rich repeat containing 75B                                      | -1.32 | 0.03602  | 0.999105 |
| <i>Ubac2</i>   | ubiquitin associated domain containing 2                                | -1.32 | 0.026835 | 0.999105 |
| <i>Tceb2</i>   | transcription elongation factor B (SIII), polypeptide 2                 | -1.32 | 0.0121   | 0.999105 |
| <i>Fan1</i>    | FANCD2/FANCI-associated nuclease 1                                      | -1.32 | 0.018977 | 0.999105 |
| <i>Rpl35</i>   | ribosomal protein L35                                                   | -1.32 | 0.049361 | 0.999105 |
| <i>Nsun2</i>   | NOL1/NOP2/Sun domain family member 2                                    | -1.32 | 0.036983 | 0.999105 |
| <i>Mib2</i>    | mindbomb homolog 2 (Drosophila)                                         | -1.32 | 0.003114 | 0.999105 |
| <i>Col6a1</i>  | collagen, type VI, alpha 1                                              | -1.31 | 0.047899 | 0.999105 |
| <i>Psen1</i>   | presenilin 1                                                            | -1.31 | 0.038673 | 0.999105 |



|                  |                                                                                                    |       |          |          |
|------------------|----------------------------------------------------------------------------------------------------|-------|----------|----------|
| <i>B4galt2</i>   | UDP-Gal:betaGlcNAc beta 1,4-galactosyltransferase, polypeptide 2                                   | -1.31 | 0.024613 | 0.999105 |
| <i>Grcc10</i>    | gene rich cluster, C10 gene                                                                        | -1.31 | 0.013169 | 0.999105 |
| <i>Hsd11</i>     | hydroxysteroid dehydrogenase like 1                                                                | -1.31 | 0.047796 | 0.999105 |
| <i>Qars</i>      | glutaminyl-tRNA synthetase                                                                         | -1.31 | 0.043092 | 0.999105 |
| <i>Chtf8</i>     | CTF8, chromosome transmission fidelity factor 8                                                    | -1.31 | 0.015666 | 0.999105 |
| <i>Dstyk</i>     | dual serine/threonine and tyrosine protein kinase                                                  | -1.31 | 0.047134 | 0.999105 |
| <i>Fam173a</i>   | family with sequence similarity 173, member A                                                      | -1.31 | 0.016807 | 0.999105 |
| <i>Serpina10</i> | serine (or cysteine) peptidase inhibitor, clade A (alpha-1 antiproteinase, antitrypsin), member 10 | -1.31 | 0.039342 | 0.999105 |
| <i>Col5a2</i>    | collagen, type V, alpha 2                                                                          | -1.31 | 0.024873 | 0.999105 |
| <i>Olf1120</i>   | olfactory receptor 1120                                                                            | -1.31 | 0.028852 | 0.999105 |
| <i>Mbd3</i>      | methyl-CpG binding domain protein 3                                                                | -1.31 | 0.040474 | 0.999105 |
| <i>Fem1c</i>     | fem-1 homolog c (C.elegans)                                                                        | -1.3  | 0.041436 | 0.999105 |
| <i>Pcp4</i>      | Purkinje cell protein 4                                                                            | -1.3  | 0.045298 | 0.999105 |
| <i>Arcp4</i>     | actin related protein 2/3 complex, subunit 4                                                       | -1.3  | 0.000253 | 0.571716 |
| <i>Msrb1</i>     | methionine sulfoxide reductase B1                                                                  | -1.3  | 0.014733 | 0.999105 |
| <i>Ubl5</i>      | ubiquitin-like 5                                                                                   | -1.3  | 0.043452 | 0.999105 |
| <i>Pla2g1b</i>   | phospholipase A2, group IB, pancreas                                                               | -1.3  | 0.03895  | 0.999105 |
| <i>Gcsh</i>      | glycine cleavage system protein H (aminomethyl carrier)                                            | -1.3  | 0.033118 | 0.999105 |
| <i>Sgca</i>      | sarcoglycan, alpha (dystrophin-associated glycoprotein)                                            | -1.3  | 0.048972 | 0.999105 |
| <i>Olf1417</i>   | olfactory receptor 1417                                                                            | -1.3  | 0.017258 | 0.999105 |
| <i>Wdr6</i>      | WD repeat domain 6                                                                                 | -1.29 | 0.03325  | 0.999105 |

|                |                                                                     |       |          |          |
|----------------|---------------------------------------------------------------------|-------|----------|----------|
| <i>Gabrd</i>   | gamma-aminobutyric acid (GABA) A receptor, subunit delta            | -1.29 | 0.049588 | 0.999105 |
| <i>Alg14</i>   | asparagine-linked glycosylation 14                                  | -1.29 | 0.010294 | 0.999105 |
| <i>Nacc2</i>   | nucleus accumbens associated 2, BEN and BTB (POZ) domain containing | -1.29 | 0.020588 | 0.999105 |
| <i>Kctd20</i>  | potassium channel tetramerisation domain containing 20              | -1.29 | 0.02344  | 0.999105 |
| <i>Olf1282</i> | olfactory receptor 1282                                             | -1.29 | 0.03296  | 0.999105 |
| <i>Yap1</i>    | yes-associated protein 1                                            | -1.29 | 0.016744 | 0.999105 |
| <i>Rhox4g</i>  | reproductive homeobox 4G                                            | -1.29 | 0.031711 | 0.999105 |
| <i>Mrpl22</i>  | mitochondrial ribosomal protein L22                                 | -1.29 | 0.035338 | 0.999105 |
| <i>Gfra3</i>   | glial cell line derived neurotrophic factor family receptor alpha 3 | -1.29 | 0.0499   | 0.999105 |
| <i>Slc43a2</i> | solute carrier family 43, member 2                                  | -1.28 | 0.01057  | 0.999105 |
| <i>Mtfr1l</i>  | mitochondrial fission regulator 1-like                              | -1.28 | 0.018629 | 0.999105 |
| <i>Wdr81</i>   | WD repeat domain 81                                                 | -1.28 | 0.031794 | 0.999105 |
| <i>Il21</i>    | interleukin 21                                                      | -1.28 | 0.023306 | 0.999105 |
| <i>B3gnt7</i>  | UDP-GlcNAc:betaGal beta-1,3-N-acetylglucosaminyltransferase 7       | -1.28 | 0.023409 | 0.999105 |
| <i>Pex14</i>   | peroxisomal biogenesis factor 14                                    | -1.28 | 0.04224  | 0.999105 |
| <i>Ccdc8</i>   | coiled-coil domain containing 8                                     | -1.28 | 0.049383 | 0.999105 |
| <i>Trpm1</i>   | transient receptor potential cation channel, subfamily M, member 1  | -1.28 | 0.015781 | 0.999105 |
| <i>Ube2s</i>   | ubiquitin-conjugating enzyme E2S                                    | -1.28 | 0.049145 | 0.999105 |
| <i>Fbxw14</i>  | F-box and WD-40 domain protein 14                                   | -1.28 | 0.013648 | 0.999105 |
| <i>Rpl26</i>   | ribosomal protein L26; ribosomal protein L26 pseudogene             | -1.28 | 0.044601 | 0.999105 |

|                |                                                                 |       |          |          |
|----------------|-----------------------------------------------------------------|-------|----------|----------|
| <i>Ptrh2</i>   | peptidyl-tRNA hydrolase 2                                       | -1.28 | 0.037458 | 0.999105 |
| <i>Nek8</i>    | NIMA (never in mitosis gene a)-related expressed kinase 8       | -1.28 | 0.014694 | 0.999105 |
| <i>Asic4</i>   | acid-sensing (proton-gated) ion channel family member 4         | -1.27 | 0.012227 | 0.999105 |
| <i>Cacna1a</i> | calcium channel, voltage-dependent, P/Q type, alpha 1A subunit  | -1.27 | 0.04496  | 0.999105 |
| <i>Cacng4</i>  | calcium channel, voltage-dependent, gamma subunit 4             | -1.27 | 0.006057 | 0.999105 |
| <i>Comt</i>    | catechol-O-methyltransferase                                    | -1.27 | 0.012364 | 0.999105 |
| <i>Calcr</i>   | calcitonin receptor                                             | -1.27 | 0.033752 | 0.999105 |
| <i>Rpl24</i>   | ribosomal protein L24; zinc finger and BTB domain containing 11 | -1.27 | 0.01876  | 0.999105 |
| <i>Uqcc2</i>   | ubiquinol-cytochrome c reductase complex assembly factor 2      | -1.27 | 0.027197 | 0.999105 |
| <i>Pak4</i>    | p21 protein (Cdc42/Rac)-activated kinase 4                      | -1.27 | 0.049062 | 0.999105 |
| <i>Tkt</i>     | transketolase; microRNA 3076                                    | -1.27 | 0.023302 | 0.999105 |
| <i>Ech1</i>    | enoyl coenzyme A hydratase 1, peroxisomal                       | -1.27 | 0.031085 | 0.999105 |
| <i>Ormdl2</i>  | ORM1-like 2 ( <i>S. cerevisiae</i> )                            | -1.27 | 0.046647 | 0.999105 |
| <i>Asna1</i>   | arsA arsenite transporter, ATP-binding, homolog 1 (bacterial)   | -1.27 | 0.037063 | 0.999105 |
| <i>Brat1</i>   | BRCA1-associated ATM activator 1                                | -1.27 | 0.045355 | 0.999105 |
| <i>Kmo</i>     | kynurenine 3-monooxygenase (kynurenine 3-hydroxylase)           | -1.27 | 0.004889 | 0.999105 |
| <i>Gpx4</i>    | glutathione peroxidase 4                                        | -1.27 | 0.040082 | 0.999105 |

|               |                                                           |       |          |          |
|---------------|-----------------------------------------------------------|-------|----------|----------|
| <i>Cnpy2</i>  | canopy 2 homolog (zebrafish)                              | -1.27 | 0.0029   | 0.999105 |
| <i>Galr2</i>  | galanin receptor 2                                        | -1.27 | 0.030944 | 0.999105 |
| <i>Sv2c</i>   | synaptic vesicle glycoprotein 2c                          | -1.26 | 0.005038 | 0.999105 |
| <i>Mief1</i>  | mitochondrial elongation factor 1                         | -1.26 | 0.019836 | 0.999105 |
| <i>Klhl21</i> | kelch-like 21                                             | -1.26 | 0.034172 | 0.999105 |
| <i>Ctse</i>   | cathepsin E                                               | -1.26 | 0.046155 | 0.999105 |
| <i>Atraid</i> | all-trans retinoic acid induced differentiation factor    | -1.26 | 0.010879 | 0.999105 |
| <i>Csn3</i>   | casein kappa                                              | -1.26 | 0.031233 | 0.999105 |
| <i>Rab19</i>  | RAB19, member RAS oncogene family                         | -1.26 | 0.019687 | 0.999105 |
| <i>Olf64</i>  | olfactory receptor 64                                     | -1.26 | 0.035331 | 0.999105 |
| <i>Eif4a3</i> | eukaryotic translation initiation factor 4A3              | -1.26 | 0.034938 | 0.999105 |
| <i>Chst1</i>  | carbohydrate (keratan sulfate Gal-6) sulfotransferase 1   | -1.25 | 0.026736 | 0.999105 |
| <i>Pgp</i>    | phosphoglycolate phosphatase                              | -1.25 | 0.005432 | 0.999105 |
| <i>Rps14</i>  | ribosomal protein S14                                     | -1.25 | 0.004885 | 0.999105 |
| <i>Clstn3</i> | calyntenin 3                                              | -1.25 | 0.025854 | 0.999105 |
| <i>Pabpn1</i> | poly(A) binding protein, nuclear 1                        | -1.25 | 0.031989 | 0.999105 |
| <i>Agap3</i>  | ArfGAP with GTPase domain, ankyrin repeat and PH domain 3 | -1.25 | 0.015186 | 0.999105 |
| <i>Ftl1</i>   | ferritin light polypeptide 1                              | -1.25 | 0.008888 | 0.999105 |
| <i>Rpl7l1</i> | ribosomal protein L7-like 1                               | -1.25 | 0.023966 | 0.999105 |
| <i>Ddx41</i>  | DEAD (Asp-Glu-Ala-Asp) box polypeptide 41                 | -1.25 | 0.037774 | 0.999105 |
| <i>Mgat5</i>  | mannoside acetylglucosaminyltransferase 5                 | -1.25 | 0.037065 | 0.999105 |
| <i>Tmed1</i>  | transmembrane emp24 domain containing 1                   | -1.25 | 0.035046 | 0.999105 |
| <i>Gja10</i>  | gap junction protein, alpha 10                            | -1.25 | 0.01572  | 0.999105 |
| <i>Olf608</i> | olfactory receptor 608                                    | -1.25 | 0.006522 | 0.999105 |
| <i>Mrpl34</i> | mitochondrial ribosomal protein L34                       | -1.25 | 0.049217 | 0.999105 |

|                |                                                                                           |       |          |          |
|----------------|-------------------------------------------------------------------------------------------|-------|----------|----------|
| <i>Snx20</i>   | sorting nexin 20                                                                          | -1.25 | 0.006352 | 0.999105 |
| <i>T</i>       | brachyury; t-complex                                                                      | -1.25 | 0.037875 | 0.999105 |
| <i>Nol3</i>    | nucleolar protein 3 (apoptosis repressor with CARD domain)                                | -1.24 | 0.035496 | 0.999105 |
| <i>Tle3</i>    | transducin-like enhancer of split 3, homolog of <i>Drosophila</i> E(spl)                  | -1.24 | 0.02191  | 0.999105 |
| <i>Col4a2</i>  | collagen, type IV, alpha 2                                                                | -1.24 | 0.027315 | 0.999105 |
| <i>Rpl19</i>   | ribosomal protein L19                                                                     | -1.24 | 0.033987 | 0.999105 |
| <i>Sez6l2</i>  | seizure related 6 homolog like 2                                                          | -1.24 | 0.034816 | 0.999105 |
| <i>Mam13</i>   | mastermind like 3 ( <i>Drosophila</i> )                                                   | -1.24 | 0.040031 | 0.999105 |
| <i>Dll3</i>    | delta-like 3 ( <i>Drosophila</i> )                                                        | -1.24 | 0.039295 | 0.999105 |
| <i>Pyhin1</i>  | pyrin and HIN domain family, member 1                                                     | -1.24 | 0.011336 | 0.999105 |
| <i>Rrp15</i>   | ribosomal RNA processing 15 homolog ( <i>S. cerevisiae</i> )                              | -1.24 | 0.038645 | 0.999105 |
| <i>Atoh1</i>   | atonal homolog 1 ( <i>Drosophila</i> )                                                    | -1.24 | 0.012485 | 0.999105 |
| <i>Ercc6l</i>  | excision repair cross-complementing rodent repair deficiency complementation group 6 like | -1.24 | 0.036003 | 0.999105 |
| <i>Aspscr1</i> | alveolar soft part sarcoma chromosome region, candidate 1 (human)                         | -1.24 | 0.044939 | 0.999105 |
| <i>Psmb11</i>  | proteasome (prosome, macropain) subunit, beta type, 11                                    | -1.24 | 0.046892 | 0.999105 |
| <i>Snx31</i>   | sorting nexin 31                                                                          | -1.24 | 0.03604  | 0.999105 |
| <i>H2-Eb1</i>  | histocompatibility 2, class II antigen E beta                                             | -1.24 | 0.039152 | 0.999105 |
| <i>Rnf32</i>   | ring finger protein 32                                                                    | -1.23 | 0.021348 | 0.999105 |
| <i>Dynlrb1</i> | dynein light chain roadblock-type 1                                                       | -1.23 | 0.00664  | 0.999105 |
| <i>Nt5c</i>    | 5,3-nucleotidase, cytosolic; 5',3'-nucleotidase, cytosolic                                | -1.23 | 0.014686 | 0.999105 |

|                 |                                                                                                        |       |          |          |
|-----------------|--------------------------------------------------------------------------------------------------------|-------|----------|----------|
| <i>Keap1</i>    | kelch-like ECH-associated protein 1                                                                    | -1.23 | 0.044251 | 0.999105 |
| <i>Lrrc51</i>   | leucine rich repeat containing 51                                                                      | -1.23 | 0.032741 | 0.999105 |
| <i>Kcnk16</i>   | potassium channel, subfamily K, member 16                                                              | -1.23 | 0.010381 | 0.999105 |
| <i>Pabpc1l</i>  | poly(A) binding protein, cytoplasmic 1-like                                                            | -1.23 | 0.042983 | 0.999105 |
| <i>Prl3d2</i>   | prolactin family 3, subfamily d, member 1                                                              | -1.23 | 0.025225 | 0.999105 |
| <i>Mllt4</i>    | myeloid/lymphoid or mixed-lineage leukemia (trithorax homolog, <i>Drosophila</i> ); translocated to, 4 | -1.23 | 0.040639 | 0.999105 |
| <i>Macrocl1</i> | MACRO domain containing 1                                                                              | -1.23 | 0.048748 | 0.999105 |
| <i>Wwc1</i>     | WW, C2 and coiled-coil domain containing 1                                                             | -1.22 | 0.010074 | 0.999105 |
| <i>Fasn</i>     | fatty acid synthase                                                                                    | -1.22 | 0.048684 | 0.999105 |
| <i>Rfxank</i>   | regulatory factor X-associated ankyrin-containing protein                                              | -1.22 | 0.038511 | 0.999105 |
| <i>Msn</i>      | moesin                                                                                                 | -1.22 | 0.024212 | 0.999105 |
| <i>Enho</i>     | energy homeostasis associated                                                                          | -1.22 | 0.025892 | 0.999105 |
| <i>Dusp23</i>   | dual specificity phosphatase 23                                                                        | -1.22 | 0.038872 | 0.999105 |
| <i>Psmc3</i>    | proteasome (prosome, macropain) 26S subunit, ATPase 3                                                  | -1.22 | 0.048361 | 0.999105 |
| <i>Lsm10</i>    | U7 snRNP-specific Sm-like protein LSM10                                                                | -1.22 | 0.020141 | 0.999105 |
| <i>Scnm1</i>    | sodium channel modifier 1                                                                              | -1.22 | 0.048528 | 0.999105 |
| <i>Pole</i>     | polymerase (DNA directed), epsilon                                                                     | -1.22 | 0.016203 | 0.999105 |
| <i>Olf410</i>   | olfactory receptor 410                                                                                 | -1.22 | 0.002646 | 0.999105 |
| <i>Olf1510</i>  | olfactory receptor 1510                                                                                | -1.22 | 0.046172 | 0.999105 |
| <i>Gemin6</i>   | gem (nuclear organelle) associated protein 6                                                           | -1.22 | 0.018707 | 0.999105 |
| <i>Gnal</i>     | guanine nucleotide binding protein, alpha stimulating, olfactory type                                  | -1.21 | 0.011871 | 0.999105 |

|                |                                                                              |       |          |          |
|----------------|------------------------------------------------------------------------------|-------|----------|----------|
| <i>Cacna1b</i> | calcium channel, voltage-dependent, N type, alpha 1B subunit                 | -1.21 | 0.014204 | 0.999105 |
| <i>Rbck1</i>   | RanBP-type and C3HC4-type zinc finger containing 1                           | -1.21 | 0.038465 | 0.999105 |
| <i>Lats2</i>   | large tumor suppressor 2                                                     | -1.21 | 0.022986 | 0.999105 |
| <i>Selo</i>    | selenoprotein O                                                              | -1.21 | 0.043438 | 0.999105 |
| <i>Adgrg1</i>  | adhesion G protein-coupled receptor G1                                       | -1.21 | 0.011821 | 0.999105 |
| <i>Bola2</i>   | bolA-like 2 (E. coli)                                                        | -1.21 | 0.005512 | 0.999105 |
| <i>Rps3</i>    | ribosomal protein S3; small nucleolar RNA, C/D box 14B                       | -1.21 | 0.019283 | 0.999105 |
| <i>Mycn</i>    | v-myc myelocytomatosis viral related oncogene, neuroblastoma derived (avian) | -1.21 | 0.024807 | 0.999105 |
| <i>Ssr4</i>    | signal sequence receptor, delta                                              | -1.21 | 0.004599 | 0.999105 |
| <i>Lgals1</i>  | lectin, galactose binding, soluble 1                                         | -1.21 | 0.035456 | 0.999105 |
| <i>Supt4b</i>  | predicted gene 3258                                                          | -1.21 | 0.004599 | 0.999105 |
| <i>Rpl7</i>    | ribosomal protein L7                                                         | -1.21 | 0.006107 | 0.999105 |
| <i>Slc30a9</i> | solute carrier family 30 (zinc transporter), member 9                        | -1.21 | 0.044851 | 0.999105 |
| <i>Mgl2</i>    | macrophage galactose N-acetyl-galactosamine specific lectin 2                | -1.21 | 0.040961 | 0.999105 |
| <i>Pou3f4</i>  | POU domain, class 3, transcription factor 4                                  | -1.2  | 0.034453 | 0.999105 |
| <i>Gipc1</i>   | GIPC PDZ domain containing family, member 1                                  | -1.2  | 0.049874 | 0.999105 |
| <i>Id3</i>     | inhibitor of DNA binding 3                                                   | -1.2  | 0.036861 | 0.999105 |
| <i>Rnf135</i>  | ring finger protein 135                                                      | -1.2  | 0.04246  | 0.999105 |
| <i>Zfp324</i>  | zinc finger protein 324                                                      | -1.2  | 0.022309 | 0.999105 |
| <i>Tlx2</i>    | T cell leukemia, homeobox 2                                                  | -1.2  | 0.01176  | 0.999105 |
| <i>Ccdc66</i>  | coiled-coil domain containing 66                                             | -1.2  | 0.044608 | 0.999105 |

|                   |                                                                                                                        |       |          |          |
|-------------------|------------------------------------------------------------------------------------------------------------------------|-------|----------|----------|
| <i>Dusp11</i>     | dual specificity phosphatase 11 (RNA/RNP complex 1-interacting)                                                        | -1.19 | 0.036325 | 0.999105 |
| <i>Zfp827</i>     | zinc finger protein 827                                                                                                | -1.19 | 0.048296 | 0.999105 |
| <i>Dctn3</i>      | dynactin 3                                                                                                             | -1.19 | 0.038569 | 0.999105 |
| <i>Pdcl</i>       | phosducin-like                                                                                                         | -1.19 | 0.043348 | 0.999105 |
| <i>Psmb1</i>      | proteasome (prosome, macropain) subunit, beta type 1                                                                   | -1.19 | 0.008951 | 0.999105 |
| <i>Fam193a</i>    | family with sequence similarity 193, member A                                                                          | -1.19 | 0.021689 | 0.999105 |
| <i>Uba52</i>      | ubiquitin A-52 residue ribosomal protein fusion product 1                                                              | -1.19 | 0.011115 | 0.999105 |
| <i>Bcan</i>       | brevican                                                                                                               | -1.19 | 0.012471 | 0.999105 |
| <i>Bdkrb1</i>     | bradykinin receptor, beta 1                                                                                            | -1.19 | 0.044482 | 0.999105 |
| <i>Edf1</i>       | endothelial differentiation-related factor 1                                                                           | -1.19 | 0.026626 | 0.999105 |
| <i>Kprp</i>       | keratinocyte expressed, proline-rich                                                                                   | -1.19 | 0.038516 | 0.999105 |
| <i>Dmap1</i>      | DNA methyltransferase 1-associated protein 1                                                                           | -1.19 | 0.046901 | 0.999105 |
| <i>Clasrp</i>     | CLK4-associating serine/arginine rich protein                                                                          | -1.19 | 0.000511 | 0.742883 |
| <i>Pdilt</i>      | protein disulfide isomerase-like, testis expressed                                                                     | -1.19 | 0.0005   | 0.742883 |
| <i>Spata31d1b</i> | spermatogenesis associated 31 subfamily D, member 1B                                                                   | -1.19 | 0.034189 | 0.999105 |
| <i>Atp5o</i>      | ATP synthase, H <sup>+</sup> transporting, mitochondrial F1 complex, O subunit                                         | -1.19 | 0.030475 | 0.999105 |
| <i>H2-Pb</i>      | histocompatibility 2, P region beta locus [Source:MGI Symbol;Acc:MGI:95926]; histocompatibility 2, P region beta locus | -1.19 | 0.027312 | 0.999105 |



|                 |                                                     |       |          |          |
|-----------------|-----------------------------------------------------|-------|----------|----------|
| <i>Ldoc1l</i>   | leucine zipper, down-regulated in cancer 1-like     | -1.18 | 0.00767  | 0.999105 |
| <i>Med12l</i>   | mediator complex subunit 12-like                    | -1.18 | 0.040452 | 0.999105 |
| <i>Dnase1l2</i> | deoxyribonuclease 1-like 2                          | -1.18 | 0.008219 | 0.999105 |
| <i>Por</i>      | P450 (cytochrome) oxidoreductase                    | -1.18 | 0.041024 | 0.999105 |
| <i>Preb</i>     | prolactin regulatory element binding                | -1.18 | 0.048219 | 0.999105 |
| <i>Usf2</i>     | upstream transcription factor 2                     | -1.18 | 0.010842 | 0.999105 |
| <i>Ascc1</i>    | activating signal cointegrator 1 complex subunit 1  | -1.18 | 0.012868 | 0.999105 |
| <i>Cts7</i>     | cathepsin 7                                         | -1.18 | 0.01259  | 0.999105 |
| <i>Defb10</i>   | defensin beta 10                                    | -1.18 | 0.032966 | 0.999105 |
| <i>Sap30bp</i>  | SAP30 binding protein                               | -1.18 | 0.046233 | 0.999105 |
| <i>Col11a2</i>  | collagen, type XI, alpha 2                          | -1.18 | 0.041306 | 0.999105 |
| <i>Sbpl</i>     | spermine binding protein-like                       | -1.18 | 0.031123 | 0.999105 |
| <i>Ndufb8</i>   | NADH dehydrogenase (ubiquinone) 1 beta subcomplex 8 | -1.18 | 0.011623 | 0.999105 |
| <i>Inpp5j</i>   | inositol polyphosphate 5-phosphatase J              | -1.17 | 0.020917 | 0.999105 |
| <i>Klc1</i>     | kinesin light chain 1                               | -1.17 | 0.014628 | 0.999105 |
| <i>Gpam</i>     | glycerol-3-phosphate acyltransferase, mitochondrial | -1.17 | 0.011594 | 0.999105 |
| <i>Ppp1r18</i>  | protein phosphatase 1, regulatory subunit 18        | -1.17 | 0.019046 | 0.999105 |
| <i>Dedd</i>     | death effector domain-containing                    | -1.17 | 0.046459 | 0.999105 |
| <i>Mrpl11</i>   | mitochondrial ribosomal protein L11                 | -1.17 | 0.03784  | 0.999105 |
| <i>Olf1087</i>  | olfactory receptor 1087                             | -1.17 | 0.01496  | 0.999105 |
| <i>Smcp</i>     | sperm mitochondria-associated cysteine-rich protein | -1.17 | 0.038375 | 0.999105 |
| <i>Trim14</i>   | tripartite motif-containing 14                      | -1.17 | 0.047211 | 0.999105 |
| <i>Steap4</i>   | STEAP family member 4                               | -1.17 | 0.028881 | 0.999105 |
| <i>Olf1649</i>  | olfactory receptor 649                              | -1.17 | 0.025849 | 0.999105 |

|                |                                                                   |       |          |          |
|----------------|-------------------------------------------------------------------|-------|----------|----------|
| <i>Olf493</i>  | olfactory receptor 493                                            | -1.17 | 0.042464 | 0.999105 |
| <i>Foxl2</i>   | forkhead box L2                                                   | -1.17 | 0.005964 | 0.999105 |
| <i>Enthd2</i>  | ENTH domain containing 2                                          | -1.17 | 0.012104 | 0.999105 |
| <i>Mgat4c</i>  | MGAT4 family, member C                                            | -1.16 | 0.007482 | 0.999105 |
| <i>Abat</i>    | 4-aminobutyrate aminotransferase                                  | -1.16 | 0.021157 | 0.999105 |
| <i>Cep112</i>  | centrosomal protein 112                                           | -1.16 | 0.026837 | 0.999105 |
| <i>Stmn3</i>   | stathmin-like 3                                                   | -1.16 | 0.023486 | 0.999105 |
| <i>Clta</i>    | clathrin, light polypeptide (Lca)                                 | -1.16 | 0.029573 | 0.999105 |
| <i>Drap1</i>   | Dr1 associated protein 1 (negative cofactor 2 alpha)              | -1.16 | 0.046226 | 0.999105 |
| <i>Ccdc174</i> | coiled-coil domain containing 174                                 | -1.16 | 0.001046 | 0.822518 |
| <i>Ahcy</i>    | S-adenosylhomocysteine hydrolase; predicted gene 4737             | -1.16 | 0.04692  | 0.999105 |
| <i>Neurog3</i> | neurogenin 3                                                      | -1.16 | 0.000723 | 0.742883 |
| <i>Pigs</i>    | phosphatidylinositol glycan anchor biosynthesis, class S          | -1.16 | 0.013443 | 0.999105 |
| <i>Eif2b1</i>  | eukaryotic translation initiation factor 2B, subunit 1 (alpha)    | -1.16 | 0.029881 | 0.999105 |
| <i>G0s2</i>    | G0/G1 switch gene 2                                               | -1.16 | 0.01018  | 0.999105 |
| <i>Apon</i>    | apolipoprotein N                                                  | -1.16 | 0.008854 | 0.999105 |
| <i>Lrr1</i>    | leucine rich repeat protein 1                                     | -1.16 | 0.048699 | 0.999105 |
| <i>Rrp36</i>   | ribosomal RNA processing 36 homolog ( <i>S. cerevisiae</i> )      | -1.16 | 0.012556 | 0.999105 |
| <i>Pomgnt1</i> | protein O-linked mannose beta 1,2-N-acetylglucosaminyltransferase | -1.15 | 0.047564 | 0.999105 |
| <i>Pirb</i>    | paired Ig-like receptor B                                         | -1.15 | 0.024406 | 0.999105 |
| <i>Uqcrcq</i>  | ubiquinol-cytochrome c reductase, complex III subunit VII         | -1.15 | 0.018958 | 0.999105 |
| <i>Shmt1</i>   | serine hydroxymethyltransferase 1 (soluble)                       | -1.15 | 0.047906 | 0.999105 |

|                |                                                                      |       |          |          |
|----------------|----------------------------------------------------------------------|-------|----------|----------|
| <i>Gfra1</i>   | glial cell line derived neurotrophic factor family receptor alpha 1  | -1.14 | 0.030831 | 0.999105 |
| <i>Prdx1</i>   | peroxiredoxin 1                                                      | -1.14 | 0.047414 | 0.999105 |
| <i>Cluap1</i>  | clusterin associated protein 1                                       | -1.14 | 0.025793 | 0.999105 |
| <i>Fbxl15</i>  | F-box and leucine-rich repeat protein 15                             | -1.14 | 0.026432 | 0.999105 |
| <i>Fads2</i>   | fatty acid desaturase 2                                              | -1.13 | 0.014065 | 0.999105 |
| <i>Cd151</i>   | CD151 antigen                                                        | -1.13 | 0.025857 | 0.999105 |
| <i>Prkcsh</i>  | protein kinase C substrate 80K-H                                     | -1.13 | 0.037276 | 0.999105 |
| <i>Slc2a10</i> | solute carrier family 2 (facilitated glucose transporter), member 10 | -1.13 | 0.040575 | 0.999105 |
| <i>Srgap2</i>  | SLIT-ROBO Rho GTPase activating protein 2                            | -1.12 | 0.016074 | 0.999105 |
| <i>Msl1</i>    | male-specific lethal 1 homolog (Drosophila)                          | -1.12 | 0.043098 | 0.999105 |
| <i>Ngdn</i>    | neuroguidin, EIF4E binding protein                                   | -1.12 | 0.031938 | 0.999105 |
| <i>Tpi1</i>    | triosephosphate isomerase 1                                          | -1.12 | 0.019162 | 0.999105 |
| <i>Fuz</i>     | fuzzy homolog (Drosophila)                                           | -1.12 | 0.038145 | 0.999105 |
| <i>Pabpn1l</i> | poly(A)binding protein nuclear 1-like                                | -1.12 | 0.037309 | 0.999105 |
| <i>Ly6c1</i>   | lymphocyte antigen 6 complex, locus C1                               | -1.11 | 0.031933 | 0.999105 |
| <i>Fam96a</i>  | family with sequence similarity 96, member A                         | -1.11 | 0.042875 | 0.999105 |
| <i>Rfpl4</i>   | ret finger protein-like 4                                            | -1.11 | 0.045927 | 0.999105 |
| <i>Magi1</i>   | membrane associated guanylate kinase, WW and PDZ domain containing 1 | -1.1  | 0.041995 | 0.999105 |
| <i>Rnf167</i>  | ring finger protein 167                                              | -1.1  | 0.038683 | 0.999105 |
| <i>Rps4x</i>   | ribosomal protein S4, X-linked                                       | -1.1  | 0.035636 | 0.999105 |
| <i>Fn3krp</i>  | fructosamine 3 kinase related protein                                | -1.1  | 0.033097 | 0.999105 |
| <i>Dr1</i>     | down-regulator of transcription 1                                    | -1.1  | 0.008808 | 0.999105 |
| <i>Aes</i>     | amino-terminal enhancer of split                                     | -1.1  | 0.011934 | 0.999105 |

|                |                                                     |       |          |          |
|----------------|-----------------------------------------------------|-------|----------|----------|
| <i>Vps28</i>   | vacuolar protein sorting 28 (yeast)                 | -1.1  | 0.034823 | 0.999105 |
| <i>Lbhd1</i>   | LBH domain containing 1; RIKEN cDNA 1810009A15 gene | -1.1  | 0.037918 | 0.999105 |
| <i>Lpin2</i>   | lipin 2                                             | -1.09 | 0.011178 | 0.999105 |
| <i>Fam216a</i> | family with sequence similarity 216, member A       | -1.09 | 0.006716 | 0.999105 |
| <i>Ehmt2</i>   | euchromatic histone lysine N-methyltransferase 2    | -1.08 | 0.04379  | 0.999105 |
| <i>Clec3a</i>  | C-type lectin domain family 3, member a             | -1.08 | 0.04023  | 0.999105 |
| <i>Uox</i>     | urate oxidase                                       | -1.06 | 0.030491 | 0.999105 |

---

**Table S6- Genes upregulated in the Cerebellum of Ala92-Dio2 mice. (p<0.05)**

| <b>Gene Symbol</b> | <b>Description</b>                                                                                | <b>Fold Change (linear) (AA CB vs. TT CB)</b> | <b>ANOVA p-value (AA CB vs. TT CB)</b> | <b>FDR p-value (AA CB vs. TT CB)</b> |
|--------------------|---------------------------------------------------------------------------------------------------|-----------------------------------------------|----------------------------------------|--------------------------------------|
| <i>ATP8</i>        | ATP synthase F0 subunit 8; ATP synthase F0 subunit 6; cytochrome c oxidase subunit III            | 1.01                                          | 0.036993                               | 0.999382                             |
| <i>COX2</i>        | cytochrome c oxidase subunit II                                                                   | 1.06                                          | 0.046433                               | 0.999382                             |
| <i>Ndufb5</i>      | NADH dehydrogenase (ubiquinone) 1 beta subcomplex, 5                                              | 1.07                                          | 0.028331                               | 0.999382                             |
| <i>Mdh2</i>        | malate dehydrogenase 2, NAD (mitochondrial)                                                       | 1.07                                          | 0.043826                               | 0.999382                             |
| <i>Mbd2</i>        | methyl-CpG binding domain protein 2                                                               | 1.07                                          | 0.023721                               | 0.999382                             |
| <i>Dnajb6</i>      | DnaJ (Hsp40) homolog, subfamily B, member 6                                                       | 1.08                                          | 0.026022                               | 0.999382                             |
| <i>Ptov1</i>       | prostate tumor over expressed gene 1                                                              | 1.08                                          | 0.036119                               | 0.999382                             |
| <i>Adk</i>         | adenosine kinase                                                                                  | 1.08                                          | 0.03424                                | 0.999382                             |
| <i>Setd3</i>       | SET domain containing 3                                                                           | 1.09                                          | 0.011953                               | 0.999382                             |
| <i>Ncoa4</i>       | nuclear receptor coactivator 4                                                                    | 1.09                                          | 0.025418                               | 0.999382                             |
| <i>Slc12a5</i>     | solute carrier family 12, member 5                                                                | 1.1                                           | 0.019766                               | 0.999382                             |
| <i>Prdx2</i>       | peroxiredoxin 2                                                                                   | 1.1                                           | 0.016058                               | 0.999382                             |
| <i>Lsm12</i>       | LSM12 homolog ( <i>S. cerevisiae</i> )                                                            | 1.1                                           | 0.012718                               | 0.999382                             |
| <i>Tmem180</i>     | transmembrane protein 180                                                                         | 1.1                                           | 0.016785                               | 0.999382                             |
| <i>Tgfbrap1</i>    | transforming growth factor, beta receptor associated protein 1                                    | 1.11                                          | 0.021036                               | 0.999382                             |
| <i>Hnrnpa3</i>     | heterogeneous nuclear ribonucleoprotein A3; heterogeneous nuclear ribonucleoprotein A3 pseudogene | 1.11                                          | 0.043443                               | 0.999382                             |
| <i>Rbbp6</i>       | retinoblastoma binding protein 6                                                                  | 1.11                                          | 0.04118                                | 0.999382                             |
| <i>Vps26b</i>      | vacuolar protein sorting 26 homolog B (yeast)                                                     | 1.11                                          | 0.049934                               | 0.999382                             |
| <i>Bbs4</i>        | Bardet-Biedl syndrome 4 (human)                                                                   | 1.11                                          | 0.048099                               | 0.999382                             |
| <i>Mthfs1</i>      | 5, 10-methenyltetrahydrofolate synthetase-like                                                    | 1.11                                          | 0.048423                               | 0.999382                             |
| <i>Ddx46</i>       | DEAD (Asp-Glu-Ala-Asp) box polypeptide 46                                                         | 1.11                                          | 0.033505                               | 0.999382                             |
| <i>Ppp1r8</i>      | protein phosphatase 1, regulatory (inhibitor) subunit 8                                           | 1.12                                          | 0.03973                                | 0.999382                             |
| <i>Tsply1</i>      | testis-specific protein, Y-encoded-like 1                                                         | 1.12                                          | 0.038787                               | 0.999382                             |
| <i>Hoxc4</i>       | homeobox C4                                                                                       | 1.12                                          | 0.043752                               | 0.999382                             |

|                |                                                                                                 |      |          |          |
|----------------|-------------------------------------------------------------------------------------------------|------|----------|----------|
| <i>Nkx2-5</i>  | NK2 homeobox 5                                                                                  | 1.12 | 0.032231 | 0.999382 |
| <i>Txn14a</i>  | thioredoxin-like 4A                                                                             | 1.12 | 0.044543 | 0.999382 |
| <i>Ssna1</i>   | Sjogrens syndrome nuclear autoantigen 1;<br>Sjogren's syndrome nuclear autoantigen 1            | 1.13 | 0.043389 | 0.999382 |
| <i>Cpa5</i>    | carboxypeptidase A5                                                                             | 1.13 | 0.04113  | 0.999382 |
| <i>Rpusd4</i>  | RNA pseudouridylate synthase domain<br>containing 4                                             | 1.13 | 0.019977 | 0.999382 |
| <i>Puf60</i>   | poly-U binding splicing factor 60                                                               | 1.13 | 0.046587 | 0.999382 |
| <i>Tuba1b</i>  | tubulin, alpha 1B                                                                               | 1.13 | 0.004062 | 0.97863  |
| <i>Csnk1a1</i> | casein kinase 1, alpha 1                                                                        | 1.13 | 0.012851 | 0.999382 |
| <i>Fer1l5</i>  | fer-1-like 5 (C. elegans)                                                                       | 1.14 | 0.045112 | 0.999382 |
| <i>Fmn1</i>    | formin 1                                                                                        | 1.14 | 0.03715  | 0.999382 |
| <i>Ptpra</i>   | protein tyrosine phosphatase, receptor type, A                                                  | 1.14 | 0.00531  | 0.999382 |
| <i>Rab33b</i>  | RAB33B, member RAS oncogene family                                                              | 1.14 | 0.029261 | 0.999382 |
| <i>Ptp4a2</i>  | protein tyrosine phosphatase 4a2                                                                | 1.14 | 0.048922 | 0.999382 |
| <i>Rad52</i>   | RAD52 homolog (S. cerevisiae)                                                                   | 1.14 | 0.028263 | 0.999382 |
| <i>Smim19</i>  | small integral membrane protein 19                                                              | 1.14 | 0.037295 | 0.999382 |
| <i>Gas7</i>    | growth arrest specific 7                                                                        | 1.14 | 0.009604 | 0.999382 |
| <i>Rapgef4</i> | Rap guanine nucleotide exchange factor (GEF) 4                                                  | 1.15 | 0.028099 | 0.999382 |
| <i>Plekha3</i> | pleckstrin homology domain-containing, family<br>A (phosphoinositide binding specific) member 3 | 1.15 | 0.034676 | 0.999382 |
| <i>Lmna</i>    | lamin A                                                                                         | 1.15 | 0.027924 | 0.999382 |
| <i>Stambp</i>  | STAM binding protein                                                                            | 1.15 | 0.006841 | 0.999382 |
| <i>Prmt1</i>   | protein arginine N-methyltransferase 1                                                          | 1.15 | 0.010298 | 0.999382 |
| <i>Rnf141</i>  | ring finger protein 141                                                                         | 1.15 | 0.009648 | 0.999382 |
| <i>Rps23</i>   | ribosomal protein S23                                                                           | 1.15 | 0.044558 | 0.999382 |
| <i>Tcstv3</i>  | 2-cell-stage, variable group, member 3                                                          | 1.15 | 0.047962 | 0.999382 |
| <i>St13</i>    | suppression of tumorigenicity 13                                                                | 1.15 | 0.035189 | 0.999382 |
| <i>Anks1</i>   | ankyrin repeat and SAM domain containing 1                                                      | 1.15 | 0.047105 | 0.999382 |
| <i>Camk2d</i>  | calcium/calmodulin-dependent protein kinase<br>II, delta                                        | 1.16 | 0.020175 | 0.999382 |
| <i>Cdc42</i>   | cell division cycle 42                                                                          | 1.16 | 0.017486 | 0.999382 |
| <i>Atraid</i>  | all-trans retinoic acid induced differentiation<br>factor                                       | 1.16 | 0.037707 | 0.999382 |
| <i>Bean1</i>   | brain expressed, associated with Nedd4, 1                                                       | 1.16 | 0.032431 | 0.999382 |

|                 |                                                                                    |      |          |          |
|-----------------|------------------------------------------------------------------------------------|------|----------|----------|
| <i>Vwa5a</i>    | von Willebrand factor A domain containing 5A                                       | 1.16 | 0.042856 | 0.999382 |
| <i>Morf4l2</i>  | mortality factor 4 like 2                                                          | 1.16 | 0.015329 | 0.999382 |
| <i>Wdpcp</i>    | WD repeat containing planar cell polarity effector                                 | 1.16 | 0.034305 | 0.999382 |
| <i>Dtnbp1</i>   | dystrobrevin binding protein 1                                                     | 1.16 | 0.04849  | 0.999382 |
| <i>Srp9</i>     | signal recognition particle 9                                                      | 1.17 | 0.04302  | 0.999382 |
| <i>Crmp1</i>    | collapsin response mediator protein 1                                              | 1.17 | 0.046504 | 0.999382 |
| <i>Sval2</i>    | seminal vesicle antigen-like 2                                                     | 1.17 | 0.020646 | 0.999382 |
| <i>Rab7</i>     | RAB7, member RAS oncogene family                                                   | 1.17 | 0.037878 | 0.999382 |
| <i>Carkd</i>    | carbohydrate kinase domain containing                                              | 1.17 | 0.045263 | 0.999382 |
| <i>Fnta</i>     | farnesyltransferase, CAAX box, alpha                                               | 1.17 | 0.045772 | 0.999382 |
| <i>Cxx1a</i>    | CAAX box 1A                                                                        | 1.17 | 0.042034 | 0.999382 |
| <i>Mrps27</i>   | mitochondrial ribosomal protein S27                                                | 1.17 | 0.045078 | 0.999382 |
| <i>Lrrc16a</i>  | leucine rich repeat containing 16A                                                 | 1.17 | 0.033583 | 0.999382 |
| <i>Pfn3</i>     | profilin 3                                                                         | 1.17 | 0.030717 | 0.999382 |
| <i>Pck2</i>     | phosphoenolpyruvate carboxykinase 2 (mitochondrial)                                | 1.17 | 0.015093 | 0.999382 |
| <i>Pabpn1</i>   | poly(A) binding protein, nuclear 1                                                 | 1.17 | 0.019005 | 0.999382 |
| <i>Tap2</i>     | transporter 2, ATP-binding cassette, sub-family B (MDR/TAP)                        | 1.17 | 0.027918 | 0.999382 |
| <i>Clic5</i>    | chloride intracellular channel 5                                                   | 1.17 | 0.021223 | 0.999382 |
| <i>Myl12b</i>   | myosin, light chain 12B, regulatory                                                | 1.17 | 0.023666 | 0.999382 |
| <i>Atic</i>     | 5-aminoimidazole-4-carboxamide ribonucleotide formyltransferase/IMP cyclohydrolase | 1.18 | 0.045885 | 0.999382 |
| <i>Oaz3</i>     | ornithine decarboxylase antizyme 3                                                 | 1.18 | 0.033435 | 0.999382 |
| <i>Por</i>      | P450 (cytochrome) oxidoreductase                                                   | 1.18 | 0.007966 | 0.999382 |
| <i>Arcp1b</i>   | actin related protein 2/3 complex, subunit 1B                                      | 1.18 | 0.034877 | 0.999382 |
| <i>Fgfr1op2</i> | FGFR1 oncogene partner 2                                                           | 1.18 | 0.001844 | 0.834811 |
| <i>Cebpg</i>    | CCAAT/enhancer binding protein (C/EBP), gamma                                      | 1.18 | 0.043317 | 0.999382 |
| <i>Comp</i>     | cartilage oligomeric matrix protein                                                | 1.18 | 0.044604 | 0.999382 |
| <i>Frg1</i>     | FSHD region gene 1                                                                 | 1.18 | 0.020361 | 0.999382 |
| <i>Cwc15</i>    | CWC15 homolog ( <i>S. cerevisiae</i> )                                             | 1.18 | 0.024584 | 0.999382 |
| <i>Tma7</i>     | translational machinery associated 7 homolog ( <i>S. cerevisiae</i> )              | 1.18 | 0.001665 | 0.834085 |
| <i>Ppp1r1b</i>  | protein phosphatase 1, regulatory (inhibitor) subunit 1B                           | 1.18 | 0.006272 | 0.999382 |
| <i>Pnmt</i>     | phenylethanolamine-N-methyltransferase                                             | 1.18 | 0.033311 | 0.999382 |
| <i>Zmym5</i>    | zinc finger, MYM-type 5                                                            | 1.18 | 0.049627 | 0.999382 |
| <i>Hacl1</i>    | 2-hydroxyacyl-CoA lyase 1                                                          | 1.18 | 0.020891 | 0.999382 |
| <i>Fem1a</i>    | feminization 1 homolog a ( <i>C. elegans</i> )                                     | 1.18 | 0.046651 | 0.999382 |

|                 |                                                                   |      |          |          |
|-----------------|-------------------------------------------------------------------|------|----------|----------|
| <i>Ltbp1</i>    | latent transforming growth factor beta binding protein 1          | 1.18 | 0.020798 | 0.999382 |
| <i>Slc26a2</i>  | solute carrier family 26 (sulfate transporter), member 2          | 1.18 | 0.000369 | 0.834085 |
| <i>Aqp12</i>    | aquaporin 12                                                      | 1.19 | 0.005189 | 0.999382 |
| <i>Kctd18</i>   | potassium channel tetramerisation domain containing 18            | 1.19 | 0.01043  | 0.999382 |
| <i>Kdsr</i>     | 3-ketodihydrosphingosine reductase                                | 1.19 | 0.027009 | 0.999382 |
| <i>Epc2</i>     | enhancer of polycomb homolog 2 (Drosophila)                       | 1.19 | 0.013409 | 0.999382 |
| <i>Dync1i2</i>  | dynein cytoplasmic 1 intermediate chain 2                         | 1.19 | 0.024847 | 0.999382 |
| <i>Rab14</i>    | RAB14, member RAS oncogene family                                 | 1.19 | 0.037577 | 0.999382 |
| <i>15-Sep</i>   | selenoprotein                                                     | 1.19 | 0.018224 | 0.999382 |
| <i>Ccl19</i>    | chemokine (C-C motif) ligand 19                                   | 1.19 | 0.024304 | 0.999382 |
| <i>Get4</i>     | golgi to ER traffic protein 4 homolog (S. cerevisiae)             | 1.19 | 0.037627 | 0.999382 |
| <i>Tas2r143</i> | taste receptor, type 2, member 143                                | 1.19 | 0.014058 | 0.999382 |
| <i>Smco3</i>    | single-pass membrane protein with coiled-coil domains 3           | 1.19 | 0.012172 | 0.999382 |
| <i>Ergic2</i>   | ERGIC and golgi 2                                                 | 1.19 | 0.000549 | 0.834085 |
| <i>Rassf7</i>   | Ras association (RalGDS/AF-6) domain family (N-terminal) member 7 | 1.19 | 0.027715 | 0.999382 |
| <i>Rbmx2</i>    | RNA binding motif protein, X-linked 2                             | 1.19 | 0.027072 | 0.999382 |
| <i>Tmem255a</i> | transmembrane protein 255A                                        | 1.19 | 0.006445 | 0.999382 |
| <i>Atg5</i>     | autophagy related 5                                               | 1.19 | 0.015422 | 0.999382 |
| <i>Lyz1</i>     | lysozyme 1                                                        | 1.19 | 0.014731 | 0.999382 |
| <i>Gphn</i>     | gephyrin                                                          | 1.19 | 0.01143  | 0.999382 |
| <i>Ajuba</i>    | ajuba LIM protein                                                 | 1.19 | 0.024841 | 0.999382 |
| <i>Rbx1</i>     | ring-box 1                                                        | 1.19 | 0.04275  | 0.999382 |
| <i>Scd1</i>     | stearoyl-Coenzyme A desaturase 1                                  | 1.19 | 0.023173 | 0.999382 |
| <i>Gstm2</i>    | glutathione S-transferase, mu 2                                   | 1.2  | 0.014787 | 0.999382 |
| <i>Atp6v0e2</i> | ATPase, H <sup>+</sup> transporting, lysosomal V0 subunit E2      | 1.2  | 0.009158 | 0.999382 |
| <i>Fkbp4</i>    | FK506 binding protein 4                                           | 1.2  | 0.00891  | 0.999382 |
| <i>Nphs1</i>    | nephrosis 1, nephrin                                              | 1.2  | 0.001491 | 0.834085 |
| <i>Zfp719</i>   | zinc finger protein 719                                           | 1.2  | 0.022663 | 0.999382 |
| <i>Olf1r547</i> | olfactory receptor 547                                            | 1.2  | 0.016851 | 0.999382 |
| <i>E2f8</i>     | E2F transcription factor 8                                        | 1.2  | 0.048892 | 0.999382 |
| <i>Olf1r609</i> | olfactory receptor 609                                            | 1.2  | 0.012231 | 0.999382 |
| <i>Rras2</i>    | related RAS viral (r-ras) oncogene homolog 2                      | 1.2  | 0.029506 | 0.999382 |
| <i>Ddx19a</i>   | DEAD (Asp-Glu-Ala-Asp) box polypeptide 19a                        | 1.2  | 0.02213  | 0.999382 |
| <i>Lrrc2</i>    | leucine rich repeat containing 2                                  | 1.2  | 0.044027 | 0.999382 |



|                  |                                                                                                         |      |          |          |
|------------------|---------------------------------------------------------------------------------------------------------|------|----------|----------|
| <i>Reps1</i>     | RalBP1 associated Eps domain containing protein                                                         | 1.2  | 0.04539  | 0.999382 |
| <i>Igfbp4</i>    | insulin-like growth factor binding protein 4                                                            | 1.2  | 0.04065  | 0.999382 |
| <i>Flii</i>      | flightless I homolog (Drosophila)                                                                       | 1.2  | 0.03549  | 0.999382 |
| <i>Ppp2r5c</i>   | protein phosphatase 2, regulatory subunit B, gamma; protein phosphatase 2, regulatory subunit B', gamma | 1.2  | 0.016798 | 0.999382 |
| <i>Rgr</i>       | retinal G protein coupled receptor                                                                      | 1.2  | 0.040458 | 0.999382 |
| <i>Zhx1</i>      | zinc fingers and homeoboxes 1                                                                           | 1.2  | 0.013672 | 0.999382 |
| <i>Fkbp1</i>     | FK506 binding protein-like                                                                              | 1.2  | 0.037946 | 0.999382 |
| <i>Ik</i>        | IK cytokine                                                                                             | 1.2  | 0.012002 | 0.999382 |
| <i>Swi5</i>      | SWI5 recombination repair homolog (yeast)                                                               | 1.21 | 0.048935 | 0.999382 |
| <i>Rpl34</i>     | ribosomal protein L34; ribosomal protein L34, pseudogene 1                                              | 1.21 | 0.026107 | 0.999382 |
| <i>Schip1</i>    | schwannomin interacting protein 1; predicted gene, 21949                                                | 1.21 | 0.032606 | 0.999382 |
| <i>Rpa2</i>      | replication protein A2                                                                                  | 1.21 | 0.005262 | 0.999382 |
| <i>Ppcs</i>      | phosphopantothenoylecysteine synthetase                                                                 | 1.21 | 0.02214  | 0.999382 |
| <i>Msantd4</i>   | Myb/SANT-like DNA-binding domain containing 4 with coiled-coils                                         | 1.21 | 0.019968 | 0.999382 |
| <i>Ptges3l</i>   | prostaglandin E synthase 3 (cytosolic)-like; alanyl-tRNA synthetase domain containing 1                 | 1.21 | 0.043977 | 0.999382 |
| <i>Spink13</i>   | serine peptidase inhibitor, Kazal type 13                                                               | 1.21 | 0.036783 | 0.999382 |
| <i>Dyrk3</i>     | dual-specificity tyrosine-(Y)-phosphorylation regulated kinase 3                                        | 1.22 | 0.028708 | 0.999382 |
| <i>Ptprt</i>     | protein tyrosine phosphatase, receptor type, T                                                          | 1.22 | 0.024526 | 0.999382 |
| <i>Gabbr2</i>    | gamma-aminobutyric acid (GABA) B receptor, 2                                                            | 1.22 | 0.01454  | 0.999382 |
| <i>St3gal5</i>   | ST3 beta-galactoside alpha-2,3-sialyltransferase 5                                                      | 1.22 | 0.002195 | 0.886072 |
| <i>Vmn2r55</i>   | vomer nasal 2, receptor 55                                                                              | 1.22 | 0.048664 | 0.999382 |
| <i>Olfir589</i>  | olfactory receptor 589                                                                                  | 1.22 | 0.046915 | 0.999382 |
| <i>Rab21</i>     | RAB21, member RAS oncogene family                                                                       | 1.22 | 0.017553 | 0.999382 |
| <i>Aldh6a1</i>   | aldehyde dehydrogenase family 6, subfamily A1                                                           | 1.22 | 0.016186 | 0.999382 |
| <i>Hist1h2ad</i> | histone cluster 1, H2ad; histone cluster 1, H3b; histone cluster 1, H3d                                 | 1.22 | 0.025364 | 0.999382 |
| <i>Mapk1</i>     | mitogen-activated protein kinase 1                                                                      | 1.22 | 0.015395 | 0.999382 |
| <i>Ankrd44</i>   | ankyrin repeat domain 44                                                                                | 1.23 | 0.016832 | 0.999382 |

|                 |                                                                        |      |          |          |
|-----------------|------------------------------------------------------------------------|------|----------|----------|
| <i>Arpc5l</i>   | actin related protein 2/3 complex, subunit 5-like                      | 1.23 | 0.004554 | 0.97863  |
| <i>Acp2</i>     | acid phosphatase 2, lysosomal                                          | 1.23 | 0.02039  | 0.999382 |
| <i>Nsun6</i>    | NOL1/NOP2/Sun domain family member 6                                   | 1.23 | 0.044664 | 0.999382 |
| <i>Phgdh</i>    | 3-phosphoglycerate dehydrogenase                                       | 1.23 | 0.047409 | 0.999382 |
| <i>Kcnc1</i>    | potassium voltage gated channel, Shaw-related subfamily, member 1      | 1.23 | 0.003659 | 0.97863  |
| <i>Mtg1</i>     | mitochondrial GTPase 1 homolog ( <i>S. cerevisiae</i> )                | 1.23 | 0.046205 | 0.999382 |
| <i>Hexa</i>     | hexosaminidase A                                                       | 1.23 | 0.0211   | 0.999382 |
| <i>Vmn1r216</i> | vomeronal 1 receptor 216                                               | 1.23 | 0.029514 | 0.999382 |
| <i>Prl3d1</i>   | prolactin family 3, subfamily d, member 1                              | 1.23 | 0.001064 | 0.834085 |
| <i>Ndufb4</i>   | NADH dehydrogenase (ubiquinone) 1 beta subcomplex 4                    | 1.23 | 0.046898 | 0.999382 |
| <i>Ndc80</i>    | NDC80 homolog, kinetochore complex component ( <i>S. cerevisiae</i> )  | 1.23 | 0.004652 | 0.97863  |
| <i>Cfb</i>      | complement factor B                                                    | 1.23 | 0.00623  | 0.999382 |
| <i>Rgs7</i>     | regulator of G protein signaling 7                                     | 1.24 | 0.048665 | 0.999382 |
| <i>Cypt12</i>   | cysteine-rich perinuclear theca 12                                     | 1.24 | 0.022937 | 0.999382 |
| <i>Tmem54</i>   | transmembrane protein 54                                               | 1.24 | 0.01967  | 0.999382 |
| <i>Pex26</i>    | peroxisomal biogenesis factor 26                                       | 1.24 | 0.035612 | 0.999382 |
| <i>Pik3c2g</i>  | phosphatidylinositol 3-kinase, C2 domain containing, gamma polypeptide | 1.24 | 0.021    | 0.999382 |
| <i>Vmn1r158</i> | vomeronal 1 receptor 158                                               | 1.24 | 0.046108 | 0.999382 |
| <i>Usp35</i>    | ubiquitin specific peptidase 35                                        | 1.24 | 0.048824 | 0.999382 |
| <i>Use1</i>     | unconventional SNARE in the ER 1 homolog ( <i>S. cerevisiae</i> )      | 1.24 | 0.032301 | 0.999382 |
| <i>Sumo2</i>    | small ubiquitin-like modifier 2; microRNA 684-1                        | 1.24 | 0.049007 | 0.999382 |
| <i>Pcnp</i>     | PEST proteolytic signal containing nuclear protein                     | 1.24 | 0.044463 | 0.999382 |
| <i>Ppic</i>     | peptidylprolyl isomerase C                                             | 1.24 | 0.021353 | 0.999382 |
| <i>Ccdc190</i>  | coiled-coil domain containing 190                                      | 1.25 | 0.02282  | 0.999382 |
| <i>Uxs1</i>     | UDP-glucuronate decarboxylase 1                                        | 1.25 | 0.009769 | 0.999382 |
| <i>Setx</i>     | senataxin                                                              | 1.25 | 0.00911  | 0.999382 |
| <i>Wfdc5</i>    | WAP four-disulfide core domain 5                                       | 1.25 | 0.007979 | 0.999382 |
| <i>Myoz2</i>    | myozenin 2                                                             | 1.25 | 0.002667 | 0.925416 |
| <i>Syf2</i>     | SYF2 homolog, RNA splicing factor ( <i>S. cerevisiae</i> )             | 1.25 | 0.020796 | 0.999382 |
| <i>Cyp2j9</i>   | cytochrome P450, family 2, subfamily j, polypeptide 9                  | 1.25 | 0.011297 | 0.999382 |
| <i>Ap4m1</i>    | adaptor-related protein complex AP-4, mu 1                             | 1.25 | 0.02834  | 0.999382 |

|                  |                                                                                 |      |          |          |
|------------------|---------------------------------------------------------------------------------|------|----------|----------|
| <i>Bub3</i>      | budding uninhibited by benzimidazoles 3 homolog ( <i>S. cerevisiae</i> )        | 1.25 | 0.002466 | 0.913123 |
| <i>Higd1a</i>    | HIG1 domain family, member 1A                                                   | 1.25 | 0.004099 | 0.97863  |
| <i>Wbp5</i>      | WW domain binding protein 5                                                     | 1.25 | 0.046195 | 0.999382 |
| <i>Gga1</i>      | golgi associated, gamma adaptin ear containing, ARF binding protein 1           | 1.25 | 0.012671 | 0.999382 |
| <i>Pgk2</i>      | phosphoglycerate kinase 2                                                       | 1.25 | 0.03776  | 0.999382 |
| <i>Ndfip1</i>    | Nedd4 family interacting protein 1                                              | 1.25 | 0.037823 | 0.999382 |
| <i>Ctsw</i>      | cathepsin W                                                                     | 1.25 | 0.029743 | 0.999382 |
| <i>Nkx1-1</i>    | NK1 transcription factor related, locus 1 ( <i>Drosophila</i> )                 | 1.25 | 0.012666 | 0.999382 |
| <i>Alg5</i>      | asparagine-linked glycosylation 5 (dolichyl-phosphate beta-glucosyltransferase) | 1.26 | 0.004521 | 0.97863  |
| <i>Toporsl</i>   | topoisomerase I binding, arginine/serine-rich like                              | 1.26 | 0.010748 | 0.999382 |
| <i>Lpcat2b</i>   | lysophosphatidylcholine acyltransferase 2B                                      | 1.26 | 0.034334 | 0.999382 |
| <i>Tpcn1</i>     | two pore channel 1                                                              | 1.26 | 0.043981 | 0.999382 |
| <i>Tgfb1i1</i>   | transforming growth factor beta 1 induced transcript 1                          | 1.26 | 0.00565  | 0.999382 |
| <i>Dll3</i>      | delta-like 3 ( <i>Drosophila</i> )                                              | 1.26 | 0.028192 | 0.999382 |
| <i>Gapdhs</i>    | glyceraldehyde-3-phosphate dehydrogenase, spermatogenic                         | 1.26 | 0.01022  | 0.999382 |
| <i>Fgl1</i>      | fibrinogen-like protein 1                                                       | 1.26 | 0.036519 | 0.999382 |
| <i>Zdhhc15</i>   | zinc finger, DHHC domain containing 15                                          | 1.26 | 0.008915 | 0.999382 |
| <i>Fbxo7</i>     | F-box protein 7                                                                 | 1.26 | 0.005729 | 0.999382 |
| <i>Zc3h10</i>    | zinc finger CCCH type containing 10                                             | 1.26 | 0.020836 | 0.999382 |
| <i>Mctp1</i>     | multiple C2 domains, transmembrane 1                                            | 1.26 | 0.046995 | 0.999382 |
| <i>Rpl8</i>      | ribosomal protein L8                                                            | 1.26 | 0.040599 | 0.999382 |
| <i>Neu1</i>      | neuraminidase 1                                                                 | 1.26 | 0.016002 | 0.999382 |
| <i>Cplx4</i>     | complexin 4                                                                     | 1.26 | 0.001324 | 0.834085 |
| <i>Stat1</i>     | signal transducer and activator of transcription 1                              | 1.27 | 0.030106 | 0.999382 |
| <i>Col6a3</i>    | collagen, type VI, alpha 3                                                      | 1.27 | 0.020339 | 0.999382 |
| <i>Gpr37l1</i>   | G protein-coupled receptor 37-like 1                                            | 1.27 | 0.001728 | 0.834085 |
| <i>Eppin</i>     | epididymal peptidase inhibitor                                                  | 1.27 | 0.047704 | 0.999382 |
| <i>Arhgef10l</i> | Rho guanine nucleotide exchange factor (GEF) 10-like                            | 1.27 | 0.0454   | 0.999382 |
| <i>Rac1</i>      | RAS-related C3 botulinum substrate 1                                            | 1.27 | 0.022232 | 0.999382 |
| <i>Olf594</i>    | olfactory receptor 594                                                          | 1.27 | 0.043114 | 0.999382 |
| <i>Ilk</i>       | integrin linked kinase                                                          | 1.27 | 0.001086 | 0.834085 |
| <i>Defb33</i>    | defensin beta 33                                                                | 1.27 | 0.027783 | 0.999382 |

|                 |                                                                                 |      |          |          |
|-----------------|---------------------------------------------------------------------------------|------|----------|----------|
| <i>Slc25a43</i> | solute carrier family 25, member 43                                             | 1.27 | 0.022268 | 0.999382 |
| <i>Rhox7b</i>   | reproductive homeobox 7B                                                        | 1.27 | 0.045931 | 0.999382 |
| <i>Olf1353</i>  | olfactory receptor 1353                                                         | 1.27 | 0.047901 | 0.999382 |
| <i>Grap</i>     | GRB2-related adaptor protein                                                    | 1.27 | 0.043807 | 0.999382 |
| <i>Canx</i>     | calnexin                                                                        | 1.27 | 0.000005 | 0.114912 |
| <i>Olf1364</i>  | olfactory receptor 1364                                                         | 1.27 | 0.006001 | 0.999382 |
| <i>Ctsl</i>     | cathepsin L                                                                     | 1.27 | 0.045982 | 0.999382 |
| <i>Pcdhb21</i>  | protocadherin beta 21; protocadherin beta 22                                    | 1.27 | 0.024068 | 0.999382 |
| <i>Tmem163</i>  | transmembrane protein 163                                                       | 1.28 | 0.039432 | 0.999382 |
| <i>Zfp697</i>   | zinc finger protein 697                                                         | 1.28 | 0.011252 | 0.999382 |
| <i>Noa1</i>     | nitric oxide associated 1                                                       | 1.28 | 0.019132 | 0.999382 |
| <i>Epo</i>      | erythropoietin                                                                  | 1.28 | 0.000029 | 0.317906 |
| <i>Olf552</i>   | olfactory receptor 552                                                          | 1.28 | 0.026674 | 0.999382 |
| <i>Vmn1r129</i> | vomer nasal 1 receptor 129                                                      | 1.28 | 0.044648 | 0.999382 |
| <i>Defa21</i>   | defensin, alpha, 21                                                             | 1.28 | 0.031024 | 0.999382 |
| <i>Enkd1</i>    | enkurin domain containing 1                                                     | 1.28 | 0.043157 | 0.999382 |
| <i>Chrdl1</i>   | chordin-like 1                                                                  | 1.28 | 0.044885 | 0.999382 |
| <i>Snrpd3</i>   | small nuclear ribonucleoprotein D3                                              | 1.28 | 0.036178 | 0.999382 |
| <i>Naca</i>     | nascent polypeptide-associated complex alpha polypeptide                        | 1.28 | 0.031369 | 0.999382 |
| <i>Myf6</i>     | myosin, light polypeptide 6, alkali, smooth muscle and non-muscle               | 1.28 | 0.004115 | 0.97863  |
| <i>Gm2a</i>     | GM2 ganglioside activator protein                                               | 1.28 | 0.03459  | 0.999382 |
| <i>Trpv3</i>    | transient receptor potential cation channel, subfamily V, member 3              | 1.28 | 0.043027 | 0.999382 |
| <i>Eml1</i>     | echinoderm microtubule associated protein like 1                                | 1.28 | 0.020137 | 0.999382 |
| <i>Mplkip</i>   | M-phase specific PLK1 interacting protein                                       | 1.28 | 0.023599 | 0.999382 |
| <i>Mcat</i>     | malonyl CoA:ACP acyltransferase (mitochondrial)                                 | 1.28 | 0.035936 | 0.999382 |
| <i>Camk2n2</i>  | calcium/calmodulin-dependent protein kinase II inhibitor 2                      | 1.28 | 0.049805 | 0.999382 |
| <i>Muc20</i>    | mucin 20                                                                        | 1.28 | 0.020651 | 0.999382 |
| <i>Trim36</i>   | tripartite motif-containing 36                                                  | 1.28 | 0.010559 | 0.999382 |
| <i>Insrr</i>    | insulin receptor-related receptor                                               | 1.29 | 0.013136 | 0.999382 |
| <i>Urod</i>     | uroporphyrinogen decarboxylase                                                  | 1.29 | 0.047629 | 0.999382 |
| <i>Rpl6</i>     | ribosomal protein L6                                                            | 1.29 | 0.037945 | 0.999382 |
| <i>Nutf2</i>    | nuclear transport factor 2; nuclear transport factor 2, pseudogene 1            | 1.29 | 0.007886 | 0.999382 |
| <i>Acta1</i>    | actin, alpha 1, skeletal muscle                                                 | 1.29 | 0.036305 | 0.999382 |
| <i>Tmppe</i>    | transmembrane protein with metallophosphoesterase domain; galactosidase, beta 1 | 1.29 | 0.008461 | 0.999382 |
| <i>Sf3b6</i>    | splicing factor 3B, subunit 6                                                   | 1.29 | 0.03359  | 0.999382 |

|                  |                                                                              |      |          |          |
|------------------|------------------------------------------------------------------------------|------|----------|----------|
| <i>Eapp</i>      | E2F-associated phosphoprotein                                                | 1.29 | 0.000841 | 0.834085 |
| <i>Rps24</i>     | ribosomal protein S24                                                        | 1.29 | 0.049652 | 0.999382 |
| <i>Atp12a</i>    | ATPase, H+/K+ transporting, nongastric, alpha polypeptide                    | 1.29 | 0.036258 | 0.999382 |
| <i>Med30</i>     | mediator complex subunit 30                                                  | 1.29 | 0.029921 | 0.999382 |
| <i>Scarf2</i>    | scavenger receptor class F, member 2                                         | 1.29 | 0.011296 | 0.999382 |
| <i>Ubal1</i>     | UBA-like domain containing 1                                                 | 1.29 | 0.025333 | 0.999382 |
| <i>Onecut2</i>   | one cut domain, family member 2                                              | 1.29 | 0.035256 | 0.999382 |
| <i>Rpl17</i>     | ribosomal protein L17                                                        | 1.29 | 0.021572 | 0.999382 |
| <i>Cd28</i>      | CD28 antigen                                                                 | 1.3  | 0.036628 | 0.999382 |
| <i>Obp2b</i>     | odorant binding protein 2B                                                   | 1.3  | 0.034384 | 0.999382 |
| <i>Olf1123</i>   | olfactory receptor 1123                                                      | 1.3  | 0.02877  | 0.999382 |
| <i>Oasl2</i>     | 2-5 oligoadenylate synthetase-like 2; 2'-5' oligoadenylate synthetase-like 2 | 1.3  | 0.028464 | 0.999382 |
| <i>Wdr95</i>     | WD40 repeat domain 95                                                        | 1.3  | 0.005949 | 0.999382 |
| <i>Cpz</i>       | carboxypeptidase Z                                                           | 1.3  | 0.047575 | 0.999382 |
| <i>Gabarapl1</i> | gamma-aminobutyric acid (GABA) A receptor-associated protein-like 1          | 1.3  | 0.012174 | 0.999382 |
| <i>Vmn1r48</i>   | vomer nasal 1 receptor 48                                                    | 1.3  | 0.023338 | 0.999382 |
| <i>Klk4</i>      | kallikrein related-peptidase 4 (protease, enamel matrix, prostate)           | 1.3  | 0.03189  | 0.999382 |
| <i>Olf312</i>    | olfactory receptor 312                                                       | 1.3  | 0.015889 | 0.999382 |
| <i>Rapgef1</i>   | Rap guanine nucleotide exchange factor (GEF)-like 1                          | 1.3  | 0.008264 | 0.999382 |
| <i>Rps27a</i>    | ribosomal protein S27A                                                       | 1.3  | 0.040559 | 0.999382 |
| <i>Rpl10l</i>    | ribosomal protein L10-like                                                   | 1.3  | 0.033708 | 0.999382 |
| <i>Gphb5</i>     | glycoprotein hormone beta 5                                                  | 1.3  | 0.046293 | 0.999382 |
| <i>Faf2</i>      | Fas associated factor family member 2                                        | 1.3  | 0.019881 | 0.999382 |
| <i>Ypel5</i>     | yippee-like 5 (Drosophila)                                                   | 1.3  | 0.001373 | 0.834085 |
| <i>Nme3</i>      | NME/NM23 nucleoside diphosphate kinase 3                                     | 1.3  | 0.002069 | 0.864268 |
| <i>Stx5a</i>     | syntaxin 5A; microRNA 6992                                                   | 1.3  | 0.046896 | 0.999382 |
| <i>Cnnm1</i>     | cyclin M1                                                                    | 1.3  | 0.041784 | 0.999382 |
| <i>ChTOP</i>     | chromatin target of PRMT1                                                    | 1.31 | 0.029938 | 0.999382 |
| <i>Fam222a</i>   | family with sequence similarity 222, member A                                | 1.31 | 0.010073 | 0.999382 |
| <i>Pbp2</i>      | phosphatidylethanolamine binding protein 2                                   | 1.31 | 0.033497 | 0.999382 |
| <i>Bhlhe41</i>   | basic helix-loop-helix family, member e41                                    | 1.31 | 0.02166  | 0.999382 |
| <i>Cml5</i>      | camello-like 5                                                               | 1.31 | 0.044244 | 0.999382 |
| <i>Kat8</i>      | K(lysine) acetyltransferase 8                                                | 1.31 | 0.030275 | 0.999382 |
| <i>Hook2</i>     | hook homolog 2 (Drosophila)                                                  | 1.31 | 0.032951 | 0.999382 |
| <i>Crispld2</i>  | cysteine-rich secretory protein LCCL domain containing 2                     | 1.31 | 0.018085 | 0.999382 |

|                 |                                                               |      |          |          |
|-----------------|---------------------------------------------------------------|------|----------|----------|
| <i>Psmb10</i>   | proteasome (prosome, macropain) subunit, beta type 10         | 1.31 | 0.009854 | 0.999382 |
| <i>Wdr61</i>    | WD repeat domain 61                                           | 1.31 | 0.021699 | 0.999382 |
| <i>Atg14</i>    | autophagy related 14                                          | 1.31 | 0.023485 | 0.999382 |
| <i>Fbln1</i>    | fibulin 1                                                     | 1.31 | 0.010578 | 0.999382 |
| <i>Rab12</i>    | RAB12, member RAS oncogene family                             | 1.31 | 0.000163 | 0.794959 |
| <i>Spata3</i>   | spermatogenesis associated 3                                  | 1.32 | 0.033696 | 0.999382 |
| <i>Sned1</i>    | sushi, nidogen and EGF-like domains 1; microRNA 6901          | 1.32 | 0.049109 | 0.999382 |
| <i>Ppp1r26</i>  | protein phosphatase 1, regulatory subunit 26                  | 1.32 | 0.045378 | 0.999382 |
| <i>Asphd1</i>   | aspartate beta-hydroxylase domain containing 1                | 1.32 | 0.035867 | 0.999382 |
| <i>Cirbp</i>    | cold inducible RNA binding protein                            | 1.32 | 0.029016 | 0.999382 |
| <i>Olfir59</i>  | olfactory receptor 59                                         | 1.32 | 0.016372 | 0.999382 |
| <i>Fyb</i>      | FYN binding protein                                           | 1.32 | 0.002738 | 0.935243 |
| <i>Trem14</i>   | triggering receptor expressed on myeloid cells-like 4         | 1.32 | 0.033185 | 0.999382 |
| <i>Zfp119a</i>  | zinc finger protein 119a                                      | 1.32 | 0.046263 | 0.999382 |
| <i>Bpifb1</i>   | BPI fold containing family B, member 1                        | 1.33 | 0.034987 | 0.999382 |
| <i>Kif2c</i>    | kinesin family member 2C                                      | 1.33 | 0.035385 | 0.999382 |
| <i>Rps17</i>    | ribosomal protein S17                                         | 1.33 | 0.011571 | 0.999382 |
| <i>F11</i>      | coagulation factor XI                                         | 1.33 | 0.041624 | 0.999382 |
| <i>Cc2d1a</i>   | coiled-coil and C2 domain containing 1A                       | 1.33 | 0.042226 | 0.999382 |
| <i>Pnlnc1</i>   | poly(A)-specific ribonuclease (PARN)-like domain containing 1 | 1.33 | 0.020647 | 0.999382 |
| <i>Pax6</i>     | paired box 6                                                  | 1.34 | 0.00908  | 0.999382 |
| <i>Polr3gl</i>  | polymerase (RNA) III (DNA directed) polypeptide G like        | 1.34 | 0.032899 | 0.999382 |
| <i>Corin</i>    | corin                                                         | 1.34 | 0.045043 | 0.999382 |
| <i>Olfir460</i> | olfactory receptor 460                                        | 1.34 | 0.046593 | 0.999382 |
| <i>Dguok</i>    | deoxyguanosine kinase                                         | 1.34 | 0.01616  | 0.999382 |
| <i>Ip6k2</i>    | inositol hexaphosphate kinase 2                               | 1.34 | 0.037539 | 0.999382 |
| <i>Wif1</i>     | Wnt inhibitory factor 1                                       | 1.34 | 0.007058 | 0.999382 |
| <i>Neurog1</i>  | neurogenin 1                                                  | 1.34 | 0.00188  | 0.834811 |
| <i>Plppr5</i>   | phospholipid phosphatase related 5                            | 1.35 | 0.033317 | 0.999382 |
| <i>Srp72</i>    | signal recognition particle 72                                | 1.35 | 0.034057 | 0.999382 |
| <i>Arhgap33</i> | Rho GTPase activating protein 33                              | 1.35 | 0.038623 | 0.999382 |
| <i>Qtrt1</i>    | queuine tRNA-ribosyltransferase 1                             | 1.35 | 0.040735 | 0.999382 |
| <i>Ccdc166</i>  | coiled-coil domain containing 166                             | 1.35 | 0.044987 | 0.999382 |
| <i>Nifk</i>     | nucleolar protein interacting with the FHA domain of MKI67    | 1.36 | 0.026697 | 0.999382 |
| <i>Col5a1</i>   | collagen, type V, alpha 1                                     | 1.36 | 0.037295 | 0.999382 |

|                   |                                                                       |      |          |          |
|-------------------|-----------------------------------------------------------------------|------|----------|----------|
| <i>Asb6</i>       | ankyrin repeat and SOCS box-containing 6                              | 1.36 | 0.035706 | 0.999382 |
| <i>Ago4</i>       | argonaute RISC catalytic subunit 4                                    | 1.36 | 0.029431 | 0.999382 |
| <i>Pole</i>       | polymerase (DNA directed), epsilon                                    | 1.36 | 0.012104 | 0.999382 |
| <i>Tet1</i>       | tet methylcytosine dioxygenase 1                                      | 1.36 | 0.03225  | 0.999382 |
| <i>Tnfrsf19</i>   | tumor necrosis factor receptor superfamily, member 19                 | 1.36 | 0.02263  | 0.999382 |
| <i>Pdia5</i>      | protein disulfide isomerase associated 5                              | 1.36 | 0.0188   | 0.999382 |
| <i>Abhd10</i>     | abhydrolase domain containing 10                                      | 1.36 | 0.00131  | 0.834085 |
| <i>Vmn2r91</i>    | vomer nasal 2, receptor 91                                            | 1.36 | 0.017877 | 0.999382 |
| <i>Ppp1r2-ps3</i> | protein phosphatase 1, regulatory (inhibitor) subunit 2, pseudogene 3 | 1.36 | 0.006904 | 0.999382 |
| <i>Speer4c</i>    | spermatogenesis associated glutamate (E)-rich protein 4C              | 1.37 | 0.026996 | 0.999382 |
| <i>Tbrg1</i>      | transforming growth factor beta regulated gene 1                      | 1.37 | 0.009007 | 0.999382 |
| <i>Hspa2</i>      | heat shock protein 2                                                  | 1.37 | 0.028296 | 0.999382 |
| <i>E2f3</i>       | E2F transcription factor 3                                            | 1.37 | 0.048449 | 0.999382 |
| <i>Arhgap24</i>   | Rho GTPase activating protein 24                                      | 1.38 | 0.032906 | 0.999382 |
| <i>Fbxw25</i>     | F-box and WD-40 domain protein 25                                     | 1.38 | 0.02362  | 0.999382 |
| <i>Polrmt</i>     | polymerase (RNA) mitochondrial (DNA directed)                         | 1.38 | 0.004365 | 0.97863  |
| <i>Wnt3</i>       | wingless-type MMTV integration site family, member 3                  | 1.38 | 0.018395 | 0.999382 |
| <i>Gabra1</i>     | gamma-aminobutyric acid (GABA) A receptor, subunit alpha 1            | 1.38 | 0.019907 | 0.999382 |
| <i>Cd99</i>       | CD99 antigen                                                          | 1.38 | 0.013332 | 0.999382 |
| <i>Olf1032</i>    | olfactory receptor 1032                                               | 1.39 | 0.034612 | 0.999382 |
| <i>Shf</i>        | Src homology 2 domain containing F                                    | 1.39 | 0.029173 | 0.999382 |
| <i>Usp18</i>      | ubiquitin specific peptidase 18                                       | 1.39 | 0.005531 | 0.999382 |
| <i>Adgrg5</i>     | adhesion G protein-coupled receptor G5                                | 1.39 | 0.040892 | 0.999382 |
| <i>Srpk3</i>      | serine/arginine-rich protein specific kinase 3                        | 1.39 | 0.033335 | 0.999382 |
| <i>Tuba1a</i>     | tubulin, alpha 1A                                                     | 1.39 | 0.036206 | 0.999382 |
| <i>Lonp1</i>      | lon peptidase 1, mitochondrial                                        | 1.39 | 0.046125 | 0.999382 |
| <i>Apcdd1</i>     | adenomatosis polyposis coli down-regulated 1                          | 1.39 | 0.030933 | 0.999382 |
| <i>Tmem167b</i>   | transmembrane protein 167B                                            | 1.4  | 0.010972 | 0.999382 |
| <i>Kdm5a</i>      | lysine (K)-specific demethylase 5A                                    | 1.4  | 0.035676 | 0.999382 |
| <i>Zfp110</i>     | zinc finger protein 110                                               | 1.4  | 0.037505 | 0.999382 |

|                 |                                                                                                                                                                                                |      |          |          |
|-----------------|------------------------------------------------------------------------------------------------------------------------------------------------------------------------------------------------|------|----------|----------|
| <i>Trpc2</i>    | transient receptor potential cation channel, subfamily C, member 2; Xrcc1 N-terminal domain containing 1; Xndc1-transient receptor potential cation channel, subfamily C, member 2 readthrough | 1.4  | 0.029283 | 0.999382 |
| <i>Birc3</i>    | baculoviral IAP repeat-containing 3                                                                                                                                                            | 1.4  | 0.001372 | 0.834085 |
| <i>Cntd1</i>    | cyclin N-terminal domain containing 1                                                                                                                                                          | 1.4  | 0.024098 | 0.999382 |
| <i>Crhbp</i>    | corticotropin releasing hormone binding protein                                                                                                                                                | 1.4  | 0.013399 | 0.999382 |
| <i>Tppp2</i>    | tubulin polymerization-promoting protein family member 2                                                                                                                                       | 1.4  | 0.006204 | 0.999382 |
| <i>Traf1</i>    | TNF receptor-associated factor 1                                                                                                                                                               | 1.41 | 0.015986 | 0.999382 |
| <i>Lrfrn1</i>   | leucine rich repeat and fibronectin type III domain containing 1; microRNA 466f-2                                                                                                              | 1.42 | 0.010323 | 0.999382 |
| <i>Glr4</i>     | glycine receptor, alpha 4 subunit                                                                                                                                                              | 1.42 | 0.014885 | 0.999382 |
| <i>Ccl9</i>     | chemokine (C-C motif) ligand 9                                                                                                                                                                 | 1.42 | 0.021765 | 0.999382 |
| <i>Ube2d2a</i>  | ubiquitin-conjugating enzyme E2D 2A                                                                                                                                                            | 1.42 | 0.00437  | 0.97863  |
| <i>Cenpl</i>    | centromere protein L                                                                                                                                                                           | 1.43 | 0.036306 | 0.999382 |
| <i>Dsn1</i>     | DSN1, MIND kinetochore complex component, homolog ( <i>S. cerevisiae</i> )                                                                                                                     | 1.43 | 0.024792 | 0.999382 |
| <i>Zfp428</i>   | zinc finger protein 428                                                                                                                                                                        | 1.43 | 0.04659  | 0.999382 |
| <i>Setd2</i>    | SET domain containing 2                                                                                                                                                                        | 1.43 | 0.001823 | 0.834811 |
| <i>Zfp729b</i>  | zinc finger protein 729b                                                                                                                                                                       | 1.43 | 0.017906 | 0.999382 |
| <i>Asic4</i>    | acid-sensing (proton-gated) ion channel family member 4                                                                                                                                        | 1.44 | 0.044968 | 0.999382 |
| <i>Slfn9</i>    | schlafen 9                                                                                                                                                                                     | 1.44 | 0.028101 | 0.999382 |
| <i>Mapk8</i>    | mitogen-activated protein kinase 8                                                                                                                                                             | 1.44 | 0.003816 | 0.97863  |
| <i>Cyb5r1</i>   | cytochrome b5 reductase 1                                                                                                                                                                      | 1.45 | 0.033609 | 0.999382 |
| <i>Hdgfrp3</i>  | hepatoma-derived growth factor, related protein 3                                                                                                                                              | 1.45 | 0.027951 | 0.999382 |
| <i>Mas1</i>     | MAS1 oncogene                                                                                                                                                                                  | 1.45 | 0.036835 | 0.999382 |
| <i>Rpl23</i>    | ribosomal protein L23                                                                                                                                                                          | 1.46 | 0.043314 | 0.999382 |
| <i>Gskip</i>    | GSK3B interacting protein                                                                                                                                                                      | 1.46 | 0.004961 | 0.999382 |
| <i>Gdf10</i>    | growth differentiation factor 10                                                                                                                                                               | 1.46 | 0.001713 | 0.834085 |
| <i>Rnase6</i>   | ribonuclease, RNase A family, 6                                                                                                                                                                | 1.46 | 0.00489  | 0.999382 |
| <i>Cdhr1</i>    | cadherin-related family member 1                                                                                                                                                               | 1.46 | 0.01547  | 0.999382 |
| <i>Grik1</i>    | glutamate receptor, ionotropic, kainate 1                                                                                                                                                      | 1.46 | 0.013432 | 0.999382 |
| <i>Chac1</i>    | ChaC, cation transport regulator 1                                                                                                                                                             | 1.47 | 0.048231 | 0.999382 |
| <i>Vmn1r113</i> | vomer nasal 1 receptor 113                                                                                                                                                                     | 1.47 | 0.029248 | 0.999382 |
| <i>Ccnb3</i>    | cyclin B3                                                                                                                                                                                      | 1.47 | 0.030969 | 0.999382 |
| <i>Spata6</i>   | spermatogenesis associated 6                                                                                                                                                                   | 1.48 | 0.006369 | 0.999382 |
| <i>Fam96b</i>   | family with sequence similarity 96, member B                                                                                                                                                   | 1.48 | 0.033137 | 0.999382 |



|                 |                                                                                         |      |          |          |
|-----------------|-----------------------------------------------------------------------------------------|------|----------|----------|
| <i>Prl2c3</i>   | prolactin family 2, subfamily c, member 3;<br>prolactin family 2, subfamily c, member 4 | 1.48 | 0.047119 | 0.999382 |
| <i>Serping1</i> | serine (or cysteine) peptidase inhibitor, clade G,<br>member 1                          | 1.49 | 0.019587 | 0.999382 |
| <i>Cyp7b1</i>   | cytochrome P450, family 7, subfamily b,<br>polypeptide 1                                | 1.49 | 0.022953 | 0.999382 |
| <i>Vmn1r6</i>   | vomer nasal 1 receptor 6                                                                | 1.49 | 0.034801 | 0.999382 |
| <i>Olfr585</i>  | olfactory receptor 585                                                                  | 1.49 | 0.016178 | 0.999382 |
| <i>Olfr147</i>  | olfactory receptor 147                                                                  | 1.49 | 0.016891 | 0.999382 |
| <i>Olfr906</i>  | olfactory receptor 906                                                                  | 1.49 | 0.011483 | 0.999382 |
| <i>Itih4</i>    | inter alpha-trypsin inhibitor, heavy chain 4                                            | 1.49 | 0.014641 | 0.999382 |
| <i>Snrnp200</i> | small nuclear ribonucleoprotein 200 (U5)                                                | 1.5  | 0.015373 | 0.999382 |
| <i>Tmod4</i>    | tropomodulin 4                                                                          | 1.5  | 0.031684 | 0.999382 |
| <i>Tmed3</i>    | transmembrane emp24 domain containing 3                                                 | 1.5  | 0.047342 | 0.999382 |
| <i>Krtap13</i>  | keratin associated protein 13                                                           | 1.5  | 0.041875 | 0.999382 |
| <i>Olfr133</i>  | olfactory receptor 133                                                                  | 1.5  | 0.038258 | 0.999382 |
| <i>Npepl1</i>   | aminopeptidase-like 1                                                                   | 1.51 | 0.007633 | 0.999382 |
| <i>Tas2r108</i> | taste receptor, type 2, member 108                                                      | 1.51 | 0.041762 | 0.999382 |
| <i>Il34</i>     | interleukin 34                                                                          | 1.51 | 0.03297  | 0.999382 |
| <i>Tubb2b</i>   | tubulin, beta 2B class IIB                                                              | 1.51 | 0.00952  | 0.999382 |
| <i>Myl12a</i>   | myosin, light chain 12A, regulatory, non-<br>sarcomeric                                 | 1.51 | 0.003175 | 0.973966 |
| <i>Sult6b1</i>  | sulfotransferase family, cytosolic, 6B, member 1                                        | 1.51 | 0.007837 | 0.999382 |
| <i>Rtkn</i>     | rhotekin                                                                                | 1.52 | 0.006081 | 0.999382 |
| <i>Usp27x</i>   | ubiquitin specific peptidase 27, X chromosome                                           | 1.52 | 0.02978  | 0.999382 |
| <i>Vmn1r232</i> | vomer nasal 1 receptor 232                                                              | 1.53 | 0.045278 | 0.999382 |
| <i>Zfp473</i>   | zinc finger protein 473                                                                 | 1.54 | 0.043398 | 0.999382 |
| <i>Defb38</i>   | defensin beta 38                                                                        | 1.54 | 0.009039 | 0.999382 |
| <i>Isoc2b</i>   | isochorismatase domain containing 2b                                                    | 1.55 | 0.011251 | 0.999382 |
| <i>Col6a4</i>   | collagen, type VI, alpha 4                                                              | 1.55 | 0.007787 | 0.999382 |
| <i>Pde8b</i>    | phosphodiesterase 8B                                                                    | 1.55 | 0.033853 | 0.999382 |
| <i>Dnajb7</i>   | DnaJ (Hsp40) homolog, subfamily B, member 7                                             | 1.56 | 0.043538 | 0.999382 |
| <i>Wdr90</i>    | WD repeat domain 90                                                                     | 1.56 | 0.02434  | 0.999382 |
| <i>Cd46</i>     | CD46 antigen, complement regulatory protein                                             | 1.57 | 0.031625 | 0.999382 |
| <i>Uckl1</i>    | uridine-cytidine kinase 1-like 1                                                        | 1.57 | 0.016875 | 0.999382 |
| <i>Ephb2</i>    | Eph receptor B2                                                                         | 1.57 | 0.0312   | 0.999382 |
| <i>Med9</i>     | mediator complex subunit 9                                                              | 1.57 | 0.010002 | 0.999382 |
| <i>Klf6</i>     | Kruppel-like factor 6                                                                   | 1.57 | 0.009046 | 0.999382 |

|                  |                                                                              |      |          |          |
|------------------|------------------------------------------------------------------------------|------|----------|----------|
| <i>Espl1</i>     | extra spindle pole bodies 1, separase                                        | 1.57 | 0.01389  | 0.999382 |
| <i>Slc1a4</i>    | solute carrier family 1 (glutamate/neutral amino acid transporter), member 4 | 1.59 | 0.021786 | 0.999382 |
| <i>Stmn4</i>     | stathmin-like 4                                                              | 1.6  | 0.012269 | 0.999382 |
| <i>Isg20l2</i>   | interferon stimulated exonuclease gene 20-like 2                             | 1.61 | 0.001275 | 0.834085 |
| <i>Scn7a</i>     | sodium channel, voltage-gated, type VII, alpha                               | 1.62 | 0.032804 | 0.999382 |
| <i>Reep6</i>     | receptor accessory protein 6                                                 | 1.63 | 0.018284 | 0.999382 |
| <i>Flna</i>      | filamin, alpha                                                               | 1.64 | 0.023752 | 0.999382 |
| <i>Gpr161</i>    | G protein-coupled receptor 161                                               | 1.66 | 0.006326 | 0.999382 |
| <i>Synj2</i>     | synaptojanin 2                                                               | 1.66 | 0.022753 | 0.999382 |
| <i>Nudt17</i>    | nudix (nucleoside diphosphate linked moiety X)-type motif 17                 | 1.67 | 0.003922 | 0.97863  |
| <i>Hist1h2bm</i> | histone cluster 1, H2bm                                                      | 1.7  | 0.039899 | 0.999382 |
| <i>Zfp457</i>    | zinc finger protein 457                                                      | 1.7  | 0.047567 | 0.999382 |
| <i>Phf7</i>      | PHD finger protein 7                                                         | 1.72 | 0.02251  | 0.999382 |
| <i>Ttc5</i>      | tetratricopeptide repeat domain 5                                            | 1.78 | 0.010135 | 0.999382 |
| <i>Vmn2r99</i>   | vomer nasal 2, receptor 99                                                   | 1.84 | 0.043939 | 0.999382 |
| <i>Gpr26</i>     | G protein-coupled receptor 26                                                | 1.9  | 0.036138 | 0.999382 |
| <i>Ulk4</i>      | unc-51-like kinase 4                                                         | 1.91 | 0.01595  | 0.999382 |
| <i>Qpct</i>      | glutaminyl-peptide cyclotransferase (glutaminyl cyclase)                     | 1.97 | 0.005801 | 0.999382 |
| <i>Cck</i>       | cholecystokinin                                                              | 1.98 | 0.021953 | 0.999382 |
| <i>Cd59a</i>     | CD59a antigen                                                                | 2.41 | 0.009247 | 0.999382 |

**Table S7- Genes downregulated in the Cerebellum of Ala92-Dio2 mice. (p<0.05)**

| <b>Gene Symbol</b> | <b>Description</b>                                          | <b>Fold Change (linear) (AA CB vs. TT CB)</b> | <b>ANOVA p-value (AA CB vs. TT CB)</b> | <b>FDR p-value (AA CB vs. TT CB)</b> |
|--------------------|-------------------------------------------------------------|-----------------------------------------------|----------------------------------------|--------------------------------------|
| <i>Gla1</i>        | glycine receptor, alpha 1 subunit                           | -2.84                                         | 0.032811                               | 0.999382                             |
| <i>Mid1</i>        | midline 1                                                   | -2.43                                         | 0.031002                               | 0.999382                             |
| <i>Mid1</i>        | midline 1                                                   | -2.43                                         | 0.031002                               | 0.999382                             |
| <i>Mrgpra2a</i>    | MAS-related GPR, member A2A                                 | -2.16                                         | 0.002549                               | 0.913123                             |
| <i>Svs6</i>        | seminal vesicle secretory protein 6                         | -2.14                                         | 0.022288                               | 0.999382                             |
| <i>Entpd4</i>      | ectonucleoside triphosphate diphosphohydrolase 4            | -2.05                                         | 0.028302                               | 0.999382                             |
| <i>Olfr1167</i>    | olfactory receptor 1167                                     | -1.97                                         | 0.015587                               | 0.999382                             |
| <i>Anxa11</i>      | annexin A11                                                 | -1.84                                         | 0.012511                               | 0.999382                             |
| <i>Murc</i>        | muscle-related coiled-coil protein                          | -1.79                                         | 0.00966                                | 0.999382                             |
| <i>Gimap4</i>      | GTPase, IMAP family member 4                                | -1.75                                         | 0.038181                               | 0.999382                             |
| <i>Esyt1</i>       | extended synaptotagmin-like protein 1                       | -1.75                                         | 0.048554                               | 0.999382                             |
| <i>Itga10</i>      | integrin, alpha 10                                          | -1.71                                         | 0.001351                               | 0.834085                             |
| <i>Prss12</i>      | protease, serine 12 neurotrypsin (motopsin)                 | -1.69                                         | 0.003829                               | 0.97863                              |
| <i>Pofut1</i>      | protein O-fucosyltransferase 1                              | -1.67                                         | 0.023611                               | 0.999382                             |
| <i>N4bp2</i>       | NEDD4 binding protein 2                                     | -1.67                                         | 0.001223                               | 0.834085                             |
| <i>Ell3</i>        | elongation factor RNA polymerase II-like 3                  | -1.66                                         | 0.004557                               | 0.97863                              |
| <i>Vmn2r5</i>      | vomer nasal 2, receptor 5                                   | -1.66                                         | 0.009451                               | 0.999382                             |
| <i>Vmn1r10</i>     | vomer nasal 1 receptor 10                                   | -1.66                                         | 0.002418                               | 0.913123                             |
| <i>Cyp2j7</i>      | cytochrome P450, family 2, subfamily j, polypeptide 7       | -1.65                                         | 0.00104                                | 0.834085                             |
| <i>Klk1b24</i>     | kallikrein 1-related peptidase b24                          | -1.65                                         | 0.027924                               | 0.999382                             |
| <i>Mcpt9</i>       | mast cell protease 9                                        | -1.63                                         | 0.021876                               | 0.999382                             |
| <i>Olfr57</i>      | olfactory receptor 57                                       | -1.62                                         | 0.017853                               | 0.999382                             |
| <i>Gdpd4</i>       | glycerophosphodiester phosphodiesterase domain containing 4 | -1.61                                         | 0.034069                               | 0.999382                             |
| <i>Cyp4f16</i>     | cytochrome P450, family 4, subfamily f, polypeptide 16      | -1.61                                         | 0.006801                               | 0.999382                             |
| <i>Layn</i>        | layilin                                                     | -1.6                                          | 0.000741                               | 0.834085                             |
| <i>Lcn6</i>        | lipocalin 6                                                 | -1.58                                         | 0.036478                               | 0.999382                             |
| <i>Adam24</i>      | a disintegrin and metallopeptidase domain 24 (testase 1)    | -1.58                                         | 0.048259                               | 0.999382                             |
| <i>Olfr1155</i>    | olfactory receptor 1155                                     | -1.56                                         | 0.018145                               | 0.999382                             |
| <i>Dusp16</i>      | dual specificity phosphatase 16                             | -1.56                                         | 0.000565                               | 0.834085                             |
| <i>Npy6r</i>       | neuropeptide Y receptor Y6                                  | -1.56                                         | 0.00749                                | 0.999382                             |
| <i>Gcnt1</i>       | glucosaminyl (N-acetyl) transferase 1, core 2               | -1.56                                         | 0.002327                               | 0.913123                             |
| <i>Olfr1136</i>    | olfactory receptor 1136                                     | -1.55                                         | 0.017751                               | 0.999382                             |
| <i>Neb</i>         | nebulin                                                     | -1.54                                         | 0.025373                               | 0.999382                             |
| <i>Ccna1</i>       | cyclin A1                                                   | -1.54                                         | 0.040411                               | 0.999382                             |

|                    |                                                             |       |          |          |
|--------------------|-------------------------------------------------------------|-------|----------|----------|
| <i>Defb7</i>       | defensin beta 7                                             | -1.54 | 0.019895 | 0.999382 |
| <i>Heph1l</i>      | hephaestin-like 1                                           | -1.54 | 0.027726 | 0.999382 |
| <i>Ankfn1</i>      | ankyrin-repeat and fibronectin type III domain containing 1 | -1.54 | 0.000788 | 0.834085 |
| <i>Ms4a6b</i>      | membrane-spanning 4-domains, subfamily A, member 6B         | -1.54 | 0.045206 | 0.999382 |
| <i>Olf1384</i>     | olfactory receptor 1384                                     | -1.53 | 0.020247 | 0.999382 |
| <i>Apob</i>        | apolipoprotein B                                            | -1.53 | 0.004814 | 0.999064 |
| <i>Kctd6</i>       | potassium channel tetramerisation domain containing 6       | -1.53 | 0.019343 | 0.999382 |
| <i>Acvrl1</i>      | activin A receptor, type II-like 1                          | -1.53 | 0.034016 | 0.999382 |
| <i>Parp10</i>      | poly (ADP-ribose) polymerase family, member 10              | -1.53 | 0.028563 | 0.999382 |
| <i>Vmn1r233</i>    | vomer nasal 1 receptor 233                                  | -1.53 | 0.013453 | 0.999382 |
| <i>Mdfic</i>       | MyoD family inhibitor domain containing                     | -1.52 | 0.01036  | 0.999382 |
| <i>Sytl5</i>       | synaptotagmin-like 5                                        | -1.52 | 0.015458 | 0.999382 |
| <i>Tc2n</i>        | tandem C2 domains, nuclear                                  | -1.52 | 0.018846 | 0.999382 |
| <i>Slc45a4</i>     | solute carrier family 45, member 4                          | -1.52 | 0.00661  | 0.999382 |
| <i>Ccdc93</i>      | coiled-coil domain containing 93                            | -1.51 | 0.002005 | 0.856408 |
| <i>Olf1077-ps1</i> | olfactory receptor 1077, pseudogene 1                       | -1.5  | 0.042409 | 0.999382 |
| <i>Olf1082</i>     | olfactory receptor 1082                                     | -1.5  | 0.025517 | 0.999382 |
| <i>Olf1170</i>     | olfactory receptor 1170                                     | -1.5  | 0.025289 | 0.999382 |
| <i>Ryr3</i>        | ryanodine receptor 3                                        | -1.5  | 0.00303  | 0.965219 |
| <i>Lce1i</i>       | late cornified envelope 11                                  | -1.5  | 0.017951 | 0.999382 |
| <i>Olf65</i>       | olfactory receptor 65                                       | -1.5  | 0.016442 | 0.999382 |
| <i>Olf937</i>      | olfactory receptor 937                                      | -1.5  | 0.029574 | 0.999382 |
| <i>Nab1</i>        | Ngfi-A binding protein 1                                    | -1.49 | 0.019716 | 0.999382 |
| <i>Olf1016</i>     | olfactory receptor 1016                                     | -1.49 | 0.003696 | 0.97863  |
| <i>Sh3tc1</i>      | SH3 domain and tetratricopeptide repeats 1                  | -1.49 | 0.020571 | 0.999382 |
| <i>Kif9</i>        | kinesin family member 9                                     | -1.49 | 0.026382 | 0.999382 |
| <i>Irx2</i>        | Iroquois related homeobox 2 (Drosophila)                    | -1.49 | 0.043783 | 0.999382 |
| <i>Cts7</i>        | cathepsin 7                                                 | -1.49 | 0.039867 | 0.999382 |
| <i>Cd82</i>        | CD82 antigen                                                | -1.47 | 0.043748 | 0.999382 |
| <i>Cyp3a16</i>     | cytochrome P450, family 3, subfamily a, polypeptide 16      | -1.47 | 0.006099 | 0.999382 |
| <i>Gpnmb</i>       | glycoprotein (transmembrane) nmb                            | -1.47 | 0.017432 | 0.999382 |
| <i>Nefl</i>        | neurofilament, light polypeptide                            | -1.47 | 0.048272 | 0.999382 |
| <i>Fkbp5</i>       | FK506 binding protein 5                                     | -1.47 | 0.046038 | 0.999382 |
| <i>Prcp</i>        | prolylcarboxypeptidase (angiotensinase C)                   | -1.45 | 0.002805 | 0.942904 |
| <i>Tcl1b5</i>      | T cell leukemia/lymphoma 1B, 5                              | -1.45 | 0.011855 | 0.999382 |
| <i>Dppa5a</i>      | developmental pluripotency associated 5A                    | -1.44 | 0.019526 | 0.999382 |
| <i>Pyroxd2</i>     | pyridine nucleotide-disulphide oxidoreductase domain 2      | -1.44 | 0.026456 | 0.999382 |
| <i>Ccdc108</i>     | coiled-coil domain containing 108                           | -1.43 | 0.017262 | 0.999382 |
| <i>Tm4sf4</i>      | transmembrane 4 superfamily member 4                        | -1.43 | 0.010518 | 0.999382 |

|                   |                                                                                                              |       |          |          |
|-------------------|--------------------------------------------------------------------------------------------------------------|-------|----------|----------|
| <i>Lyn</i>        | Yamaguchi sarcoma viral (v-yes-1) oncogene homolog                                                           | -1.43 | 0.010078 | 0.999382 |
| <i>Cmtm2b</i>     | CKLF-like MARVEL transmembrane domain containing 2B                                                          | -1.43 | 0.00749  | 0.999382 |
| <i>Vmn1r220</i>   | vomer nasal 1 receptor 220                                                                                   | -1.43 | 0.003298 | 0.973966 |
| <i>Pla2g1b</i>    | phospholipase A2, group IB, pancreas                                                                         | -1.42 | 0.006439 | 0.999382 |
| <i>Vmn1r9</i>     | vomer nasal 1 receptor 9                                                                                     | -1.42 | 0.021176 | 0.999382 |
| <i>Crx</i>        | cone-rod homeobox                                                                                            | -1.42 | 0.000717 | 0.834085 |
| <i>Slc5a4a</i>    | solute carrier family 5, member 4a                                                                           | -1.42 | 0.027683 | 0.999382 |
| <i>Lect2</i>      | leukocyte cell-derived chemotaxin 2                                                                          | -1.42 | 0.017531 | 0.999382 |
| <i>Olf221</i>     | olfactory receptor 221                                                                                       | -1.42 | 0.030817 | 0.999382 |
| <i>C1ra</i>       | complement component 1, r subcomponent A                                                                     | -1.41 | 0.009268 | 0.999382 |
| <i>Sbk3</i>       | SH3 domain binding kinase family, member 3                                                                   | -1.41 | 0.036009 | 0.999382 |
| <i>Klf1</i>       | Kruppel-like factor 1 (erythroid)                                                                            | -1.41 | 0.046004 | 0.999382 |
| <i>Fam149a</i>    | family with sequence similarity 149, member A                                                                | -1.41 | 0.012673 | 0.999382 |
| <i>Ar</i>         | androgen receptor                                                                                            | -1.41 | 0.001568 | 0.834085 |
| <i>Fam132b</i>    | family with sequence similarity 132, member B                                                                | -1.4  | 0.038747 | 0.999382 |
| <i>Nans</i>       | N-acetylneuraminic acid synthase (sialic acid synthase)                                                      | -1.4  | 0.007132 | 0.999382 |
| <i>Cypt2</i>      | cysteine-rich perinuclear theca 2                                                                            | -1.4  | 0.010123 | 0.999382 |
| <i>Nup43</i>      | nucleoporin 43                                                                                               | -1.4  | 0.000882 | 0.834085 |
| <i>Wfdc17</i>     | WAP four-disulfide core domain 17                                                                            | -1.4  | 0.043282 | 0.999382 |
| <i>Olf398</i>     | olfactory receptor 398                                                                                       | -1.4  | 0.007148 | 0.999382 |
| <i>St6galnac2</i> | ST6 (alpha-N-acetyl-neuraminy-2,3-beta-galactosyl-1,3)-N-acetylgalactosaminide alpha-2,6-sialyltransferase 2 | -1.4  | 0.001306 | 0.834085 |
| <i>Csrnp2</i>     | cysteine-serine-rich nuclear protein 2                                                                       | -1.4  | 0.001555 | 0.834085 |
| <i>Nrg2</i>       | neuregulin 2                                                                                                 | -1.4  | 0.00932  | 0.999382 |
| <i>Aspm</i>       | asp (abnormal spindle)-like, microcephaly associated (Drosophila)                                            | -1.39 | 0.02076  | 0.999382 |
| <i>Entpd8</i>     | ectonucleoside triphosphate diphosphohydrolase 8                                                             | -1.39 | 0.007745 | 0.999382 |
| <i>Usp13</i>      | ubiquitin specific peptidase 13 (isopeptidase T-3)                                                           | -1.39 | 0.006402 | 0.999382 |
| <i>Nipa1</i>      | non imprinted in Prader-Willi/Angelman syndrome 1 homolog (human)                                            | -1.39 | 0.005178 | 0.999382 |
| <i>Myct1</i>      | myc target 1                                                                                                 | -1.39 | 0.041204 | 0.999382 |
| <i>Ccdc138</i>    | coiled-coil domain containing 138                                                                            | -1.39 | 0.040686 | 0.999382 |
| <i>Arsg</i>       | arylsulfatase G                                                                                              | -1.39 | 0.034829 | 0.999382 |
| <i>Elovl7</i>     | ELOVL family member 7, elongation of long chain fatty acids (yeast)                                          | -1.39 | 0.026635 | 0.999382 |
| <i>Krtap27-1</i>  | keratin associated protein 27-1                                                                              | -1.39 | 0.047129 | 0.999382 |

|                      |                                                                 |       |          |          |
|----------------------|-----------------------------------------------------------------|-------|----------|----------|
| <i>Prnd</i>          | prion protein dublet; prion protein; prion protein gene complex | -1.38 | 0.031395 | 0.999382 |
| <i>8030411F24Rik</i> | RIKEN cDNA 8030411F24 gene                                      | -1.38 | 0.019785 | 0.999382 |
| <i>Tspyl3</i>        | TSPY-like 3                                                     | -1.38 | 0.010282 | 0.999382 |
| <i>Fhl3</i>          | four and a half LIM domains 3                                   | -1.38 | 0.031898 | 0.999382 |
| <i>Wtip</i>          | WT1-interacting protein                                         | -1.38 | 0.012352 | 0.999382 |
| <i>Olfr901</i>       | olfactory receptor 901                                          | -1.38 | 0.016051 | 0.999382 |
| <i>Bcl2l10</i>       | Bcl2-like 10                                                    | -1.38 | 0.032637 | 0.999382 |
| <i>Olfr773</i>       | olfactory receptor 773                                          | -1.38 | 0.015594 | 0.999382 |
| <i>Vmn2r124</i>      | vomeronasal 2, receptor 124                                     | -1.38 | 0.02815  | 0.999382 |
| <i>Olfr137</i>       | olfactory receptor 137                                          | -1.38 | 0.047559 | 0.999382 |
| <i>Rhot2</i>         | ras homolog gene family, member T2                              | -1.38 | 0.013854 | 0.999382 |
| <i>Fam53c</i>        | family with sequence similarity 53, member C                    | -1.38 | 0.000414 | 0.834085 |
| <i>Hoxd3</i>         | homeobox D3; homeobox D4                                        | -1.37 | 0.038542 | 0.999382 |
| <i>Ttc39b</i>        | tetratricopeptide repeat domain 39B                             | -1.37 | 0.026725 | 0.999382 |
| <i>Gimap8</i>        | GTPase, IMAP family member 8                                    | -1.37 | 0.028619 | 0.999382 |
| <i>Cfap46</i>        | cilia and flagella associated protein 46                        | -1.37 | 0.036076 | 0.999382 |
| <i>Ano1</i>          | anoctamin 1, calcium activated chloride channel                 | -1.37 | 0.036567 | 0.999382 |
| <i>Slc9a9</i>        | solute carrier family 9 (sodium/hydrogen exchanger), member 9   | -1.37 | 0.01936  | 0.999382 |
| <i>Pnpo</i>          | pyridoxine 5-phosphate oxidase; pyridoxine 5'-phosphate oxidase | -1.37 | 0.010054 | 0.999382 |
| <i>Tpo</i>           | thyroid peroxidase                                              | -1.37 | 0.026818 | 0.999382 |
| <i>Vmn2r117</i>      | vomeronasal 2, receptor 117                                     | -1.37 | 0.046783 | 0.999382 |
| <i>Rnf208</i>        | ring finger protein 208                                         | -1.36 | 0.015518 | 0.999382 |
| <i>Wisp2</i>         | WNT1 inducible signaling pathway protein 2                      | -1.36 | 0.046945 | 0.999382 |
| <i>Tti1</i>          | TELO2 interacting protein 1                                     | -1.36 | 0.034081 | 0.999382 |
| <i>Adra2c</i>        | adrenergic receptor, alpha 2c                                   | -1.36 | 0.023102 | 0.999382 |
| <i>Adam39</i>        | a disintegrin and metallopeptidase domain 39                    | -1.36 | 0.021999 | 0.999382 |
| <i>Fuk</i>           | fucokinase                                                      | -1.36 | 0.023333 | 0.999382 |
| <i>Sowahd</i>        | sosondowah ankyrin repeat domain family member D                | -1.36 | 0.028468 | 0.999382 |
| <i>Lrig3</i>         | leucine-rich repeats and immunoglobulin-like domains 3          | -1.36 | 0.002541 | 0.913123 |
| <i>Rdh1</i>          | retinol dehydrogenase 1 (all trans); retinol dehydrogenase 9    | -1.36 | 0.022474 | 0.999382 |
| <i>Olfr815</i>       | olfactory receptor 815                                          | -1.36 | 0.002845 | 0.942904 |
| <i>Olfr1388</i>      | olfactory receptor 1388                                         | -1.36 | 0.012735 | 0.999382 |
| <i>Stard3</i>        | START domain containing 3                                       | -1.36 | 0.028782 | 0.999382 |
| <i>Vrk1</i>          | vaccinia related kinase 1                                       | -1.36 | 0.035791 | 0.999382 |
| <i>Fgd4</i>          | FYVE, RhoGEF and PH domain containing 4                         | -1.36 | 0.004588 | 0.97863  |
| <i>Vmn1r236</i>      | vomeronasal 1 receptor 236                                      | -1.36 | 0.000901 | 0.834085 |
| <i>Syt12</i>         | synaptotagmin XII                                               | -1.36 | 0.010694 | 0.999382 |

|                  |                                                           |       |          |          |
|------------------|-----------------------------------------------------------|-------|----------|----------|
| <i>Aven</i>      | apoptosis, caspase activation inhibitor                   | -1.35 | 0.032169 | 0.999382 |
| <i>Prkci</i>     | protein kinase C, iota                                    | -1.35 | 0.003577 | 0.97863  |
| <i>Mest</i>      | mesoderm specific transcript                              | -1.35 | 0.025784 | 0.999382 |
| <i>Hrc</i>       | histidine rich calcium binding protein                    | -1.35 | 0.026794 | 0.999382 |
| <i>Olf1r531</i>  | olfactory receptor 531                                    | -1.35 | 0.0391   | 0.999382 |
| <i>Rnaseh2a</i>  | ribonuclease H2, large subunit                            | -1.35 | 0.000324 | 0.834085 |
| <i>Kcng4</i>     | potassium voltage-gated channel, subfamily G, member 4    | -1.35 | 0.041354 | 0.999382 |
| <i>Ngp</i>       | neutrophilic granule protein                              | -1.35 | 0.016543 | 0.999382 |
| <i>Nphp3</i>     | nephronophthisis 3 (adolescent)                           | -1.35 | 0.034688 | 0.999382 |
| <i>Lace1</i>     | lactation elevated 1                                      | -1.35 | 0.022083 | 0.999382 |
| <i>C1qtnf2</i>   | C1q and tumor necrosis factor related protein 2           | -1.35 | 0.017753 | 0.999382 |
| <i>Amdhd2</i>    | amidohydrolase domain containing 2                        | -1.35 | 0.038396 | 0.999382 |
| <i>Il17a</i>     | interleukin 17A                                           | -1.34 | 0.004366 | 0.97863  |
| <i>Usp40</i>     | ubiquitin specific peptidase 40                           | -1.34 | 0.008963 | 0.999382 |
| <i>Il20</i>      | interleukin 20                                            | -1.34 | 0.019727 | 0.999382 |
| <i>Ccdc30</i>    | coiled-coil domain containing 30                          | -1.34 | 0.027683 | 0.999382 |
| <i>Ppp1r12c</i>  | protein phosphatase 1, regulatory (inhibitor) subunit 12C | -1.34 | 0.033844 | 0.999382 |
| <i>Trap1a</i>    | tumor rejection antigen P1A                               | -1.34 | 0.016765 | 0.999382 |
| <i>Slc39a3</i>   | solute carrier family 39 (zinc transporter), member 3     | -1.34 | 0.037671 | 0.999382 |
| <i>Ccdc57</i>    | coiled-coil domain containing 57                          | -1.34 | 0.031998 | 0.999382 |
| <i>Zbtb1</i>     | zinc finger and BTB domain containing 1                   | -1.34 | 0.044663 | 0.999382 |
| <i>Sec16b</i>    | SEC16 homolog B ( <i>S. cerevisiae</i> )                  | -1.33 | 0.01137  | 0.999382 |
| <i>Zfp442</i>    | zinc finger protein 442                                   | -1.33 | 0.019516 | 0.999382 |
| <i>Rbp7</i>      | retinol binding protein 7, cellular                       | -1.33 | 0.009014 | 0.999382 |
| <i>Pxn</i>       | paxillin                                                  | -1.33 | 0.02652  | 0.999382 |
| <i>Zfp568</i>    | zinc finger protein 568                                   | -1.33 | 0.010204 | 0.999382 |
| <i>Alpk3</i>     | alpha-kinase 3                                            | -1.33 | 0.016395 | 0.999382 |
| <i>Olf1r632</i>  | olfactory receptor 632                                    | -1.33 | 0.001418 | 0.834085 |
| <i>Olf1r701</i>  | olfactory receptor 701                                    | -1.33 | 0.008018 | 0.999382 |
| <i>Nr2f6</i>     | nuclear receptor subfamily 2, group F, member 6           | -1.33 | 0.049431 | 0.999382 |
| <i>Olf1r963</i>  | olfactory receptor 963                                    | -1.33 | 0.000615 | 0.834085 |
| <i>Oog1</i>      | oogenesis 1; predicted gene 2042                          | -1.33 | 0.030637 | 0.999382 |
| <i>Adssl1</i>    | adenylosuccinate synthetase like 1                        | -1.33 | 0.011134 | 0.999382 |
| <i>Dio2</i>      | deiodinase, iodothyronine, type II                        | -1.33 | 0.001357 | 0.834085 |
| <i>Wdr60</i>     | WD repeat domain 60                                       | -1.33 | 0.017184 | 0.999382 |
| <i>Casp7</i>     | caspase 7                                                 | -1.33 | 0.045572 | 0.999382 |
| <i>Prlhr</i>     | prolactin releasing hormone receptor                      | -1.33 | 0.003004 | 0.965219 |
| <i>Nvl</i>       | nuclear VCP-like                                          | -1.32 | 0.043581 | 0.999382 |
| <i>Olf1r1084</i> | olfactory receptor 1084                                   | -1.32 | 0.034839 | 0.999382 |
| <i>Olf1r1239</i> | olfactory receptor 1239                                   | -1.32 | 0.025405 | 0.999382 |
| <i>Usp45</i>     | ubiquitin specific peptidase 45                           | -1.32 | 0.016134 | 0.999382 |

|                 |                                                              |       |          |          |
|-----------------|--------------------------------------------------------------|-------|----------|----------|
| <i>Mkrn2os</i>  | makorin, ring finger protein 2, opposite strand              | -1.32 | 0.028943 | 0.999382 |
| <i>Psg26</i>    | pregnancy-specific glycoprotein 26                           | -1.32 | 0.037446 | 0.999382 |
| <i>Gcdh</i>     | glutaryl-Coenzyme A dehydrogenase                            | -1.32 | 0.00805  | 0.999382 |
| <i>Otx2</i>     | orthodenticle homolog 2                                      | -1.32 | 0.04531  | 0.999382 |
| <i>Kcnj3</i>    | potassium inwardly-rectifying channel, subfamily J, member 3 | -1.31 | 0.034896 | 0.999382 |
| <i>Olf1206</i>  | olfactory receptor 1206                                      | -1.31 | 0.035549 | 0.999382 |
| <i>Olf1109</i>  | olfactory receptor 1109                                      | -1.31 | 0.029099 | 0.999382 |
| <i>Olf71</i>    | olfactory receptor 71                                        | -1.31 | 0.014886 | 0.999382 |
| <i>Vmn1r160</i> | vomer nasal 1 receptor 160                                   | -1.31 | 0.009746 | 0.999382 |
| <i>Ltbp4</i>    | latent transforming growth factor beta binding protein 4     | -1.31 | 0.021447 | 0.999382 |
| <i>Cks1brt</i>  | CDC28 protein kinase 1b, retrogene                           | -1.31 | 0.017275 | 0.999382 |
| <i>Taar8a</i>   | trace amine-associated receptor 8A                           | -1.31 | 0.002623 | 0.924525 |
| <i>Nuak1</i>    | NUAK family, SNF1-like kinase, 1                             | -1.31 | 0.001578 | 0.834085 |
| <i>Slfn8</i>    | schlafen 8                                                   | -1.31 | 0.036818 | 0.999382 |
| <i>Strn</i>     | striatin, calmodulin binding protein                         | -1.31 | 0.009531 | 0.999382 |
| <i>Sdhaf2</i>   | succinate dehydrogenase complex assembly factor 2            | -1.31 | 0.034143 | 0.999382 |
| <i>Rragc</i>    | Ras-related GTP binding C                                    | -1.3  | 0.013623 | 0.999382 |
| <i>Jun</i>      | jun proto-oncogene                                           | -1.3  | 0.017782 | 0.999382 |
| <i>Hsd11b2</i>  | hydroxysteroid 11-beta dehydrogenase 2                       | -1.3  | 0.002102 | 0.864268 |
| <i>Rexo2</i>    | REX2, RNA exonuclease 2 homolog (S. cerevisiae)              | -1.3  | 0.004204 | 0.97863  |
| <i>Cry1</i>     | cryptochrome 1 (photolyase-like)                             | -1.3  | 0.036762 | 0.999382 |
| <i>Zfp2</i>     | zinc finger protein 2                                        | -1.3  | 0.046275 | 0.999382 |
| <i>Msi2</i>     | musashi RNA-binding protein 2                                | -1.3  | 0.007798 | 0.999382 |
| <i>Pyy</i>      | peptide YY                                                   | -1.3  | 0.017765 | 0.999382 |
| <i>Map3k9</i>   | mitogen-activated protein kinase kinase kinase 9             | -1.3  | 0.001532 | 0.834085 |
| <i>Aldh5a1</i>  | aldehyde dehydrogenase family 5, subfamily A1                | -1.3  | 0.017796 | 0.999382 |
| <i>Prkcd</i>    | protein kinase C, delta                                      | -1.3  | 0.04091  | 0.999382 |
| <i>Hspa13</i>   | heat shock protein 70 family, member 13                      | -1.3  | 0.000893 | 0.834085 |
| <i>Olf127</i>   | olfactory receptor 127                                       | -1.3  | 0.016454 | 0.999382 |
| <i>Adrb2</i>    | adrenergic receptor, beta 2                                  | -1.3  | 0.039393 | 0.999382 |
| <i>Pnliprp1</i> | pancreatic lipase related protein 1                          | -1.3  | 0.027498 | 0.999382 |
| <i>Sh2d1b1</i>  | SH2 domain containing 1B1                                    | -1.29 | 0.025734 | 0.999382 |
| <i>Dedd</i>     | death effector domain-containing                             | -1.29 | 0.022558 | 0.999382 |
| <i>Tnp1</i>     | transition protein 1                                         | -1.29 | 0.036688 | 0.999382 |
| <i>Mapkbp1</i>  | mitogen-activated protein kinase binding protein 1           | -1.29 | 0.031157 | 0.999382 |
| <i>Rnf224</i>   | ring finger protein 224                                      | -1.29 | 0.022362 | 0.999382 |
| <i>Ano3</i>     | anoctamin 3                                                  | -1.29 | 0.034372 | 0.999382 |



|                 |                                                                                          |       |          |          |
|-----------------|------------------------------------------------------------------------------------------|-------|----------|----------|
| <i>Cyp4a29</i>  | cytochrome P450, family 4, subfamily a, polypeptide 29                                   | -1.29 | 0.034288 | 0.999382 |
| <i>Bud31</i>    | BUD31 homolog (yeast)                                                                    | -1.29 | 0.034072 | 0.999382 |
| <i>Man2b1</i>   | mannosidase 2, alpha B1                                                                  | -1.29 | 0.02555  | 0.999382 |
| <i>Rhox5</i>    | reproductive homeobox 5                                                                  | -1.29 | 0.048961 | 0.999382 |
| <i>Vnn3</i>     | vanin 3                                                                                  | -1.29 | 0.018153 | 0.999382 |
| <i>Ccno</i>     | cyclin O                                                                                 | -1.29 | 0.025894 | 0.999382 |
| <i>Ranbp9</i>   | RAN binding protein 9                                                                    | -1.29 | 0.037455 | 0.999382 |
| <i>Ang3</i>     | angiogenin, ribonuclease A family, member 3; angiogenin, ribonuclease A family, member 5 | -1.29 | 0.009903 | 0.999382 |
| <i>Ccdc122</i>  | coiled-coil domain containing 122                                                        | -1.29 | 0.036748 | 0.999382 |
| <i>Rnase13</i>  | ribonuclease, RNase A family, 13 (non-active)                                            | -1.29 | 0.030809 | 0.999382 |
| <i>Slc52a3</i>  | solute carrier protein family 52, member 3                                               | -1.28 | 0.008284 | 0.999382 |
| <i>Defb28</i>   | defensin beta 28                                                                         | -1.28 | 0.047159 | 0.999382 |
| <i>Olf1195</i>  | olfactory receptor 1195                                                                  | -1.28 | 0.018257 | 0.999382 |
| <i>Cog6</i>     | component of oligomeric golgi complex 6                                                  | -1.28 | 0.01417  | 0.999382 |
| <i>Sfn</i>      | stratifin                                                                                | -1.28 | 0.023771 | 0.999382 |
| <i>Tmem214</i>  | transmembrane protein 214                                                                | -1.28 | 0.030725 | 0.999382 |
| <i>Mesp2</i>    | mesoderm posterior 2                                                                     | -1.28 | 0.038004 | 0.999382 |
| <i>Gtf2e2</i>   | general transcription factor II E, polypeptide 2 (beta subunit)                          | -1.28 | 0.044181 | 0.999382 |
| <i>Zmat5</i>    | zinc finger, matrin type 5                                                               | -1.28 | 0.049194 | 0.999382 |
| <i>Mmgt2</i>    | membrane magnesium transporter 2                                                         | -1.28 | 0.032077 | 0.999382 |
| <i>Mier3</i>    | mesoderm induction early response 1, family member 3                                     | -1.28 | 0.021942 | 0.999382 |
| <i>Slc22a23</i> | solute carrier family 22, member 23                                                      | -1.28 | 0.046988 | 0.999382 |
| <i>Fbp2</i>     | fructose biphosphatase 2                                                                 | -1.28 | 0.040101 | 0.999382 |
| <i>Kcnj6</i>    | potassium inwardly-rectifying channel, subfamily J, member 6                             | -1.28 | 0.014296 | 0.999382 |
| <i>Tagap1</i>   | T cell activation GTPase activating protein 1                                            | -1.28 | 0.039495 | 0.999382 |
| <i>Slamf6</i>   | SLAM family member 6                                                                     | -1.27 | 0.03295  | 0.999382 |
| <i>Hoxd1</i>    | homeobox D1                                                                              | -1.27 | 0.023285 | 0.999382 |
| <i>Rnf24</i>    | ring finger protein 24                                                                   | -1.27 | 0.00343  | 0.973966 |
| <i>Cdkn2b</i>   | cyclin-dependent kinase inhibitor 2B (p15, inhibits CDK4)                                | -1.27 | 0.042812 | 0.999382 |
| <i>Cela2a</i>   | chymotrypsin-like elastase family, member 2A                                             | -1.27 | 0.029383 | 0.999382 |
| <i>Acad12</i>   | acyl-Coenzyme A dehydrogenase family, member 12                                          | -1.27 | 0.041429 | 0.999382 |
| <i>Strn4</i>    | striatin, calmodulin binding protein 4                                                   | -1.27 | 0.021853 | 0.999382 |
| <i>Klk1</i>     | kallikrein 1                                                                             | -1.27 | 0.004628 | 0.97863  |
| <i>Zfp276</i>   | zinc finger protein (C2H2 type) 276                                                      | -1.27 | 0.008885 | 0.999382 |
| <i>Tubd1</i>    | tubulin, delta 1                                                                         | -1.27 | 0.036462 | 0.999382 |
| <i>Mrpl16</i>   | mitochondrial ribosomal protein L16                                                      | -1.27 | 0.009118 | 0.999382 |

|                  |                                                                                                 |       |          |          |
|------------------|-------------------------------------------------------------------------------------------------|-------|----------|----------|
| <i>Lenep</i>     | lens epithelial protein; RFad1, flavin adenine dinucleotide synthetase, homolog (yeast)         | -1.26 | 0.013636 | 0.999382 |
| <i>Nom1</i>      | nucleolar protein with MIF4G domain 1                                                           | -1.26 | 0.048964 | 0.999382 |
| <i>Ccdc60</i>    | coiled-coil domain containing 60                                                                | -1.26 | 0.004414 | 0.97863  |
| <i>Fam71f1</i>   | family with sequence similarity 71, member F1                                                   | -1.26 | 0.013401 | 0.999382 |
| <i>Tpra1</i>     | transmembrane protein, adipocyte associated 1                                                   | -1.26 | 0.047541 | 0.999382 |
| <i>Myo7a</i>     | myosin VIIA                                                                                     | -1.26 | 0.009574 | 0.999382 |
| <i>Tnks</i>      | tankyrase, TRF1-interacting ankyrin-related ADP-ribose polymerase                               | -1.26 | 0.008568 | 0.999382 |
| <i>Npy5r</i>     | neuropeptide Y receptor Y5                                                                      | -1.26 | 0.016078 | 0.999382 |
| <i>Usp3</i>      | ubiquitin specific peptidase 3                                                                  | -1.26 | 0.01629  | 0.999382 |
| <i>Ap1s2</i>     | adaptor-related protein complex 1, sigma 2 subunit                                              | -1.26 | 0.044277 | 0.999382 |
| <i>Yy2</i>       | Yy2 transcription factor; membrane-bound transcription factor peptidase, site 2                 | -1.26 | 0.001002 | 0.834085 |
| <i>Gabrp</i>     | gamma-aminobutyric acid (GABA) A receptor, pi                                                   | -1.26 | 0.035253 | 0.999382 |
| <i>Nqo2</i>      | NAD(P)H dehydrogenase, quinone 2                                                                | -1.26 | 0.024361 | 0.999382 |
| <i>Nagpa</i>     | N-acetylglucosamine-1-phosphodiester alpha-N-acetylglucosaminidase                              | -1.26 | 0.013111 | 0.999382 |
| <i>Krtap16-3</i> | keratin associated protein 16-3                                                                 | -1.26 | 0.042091 | 0.999382 |
| <i>Hlcs</i>      | holocarboxylase synthetase (biotin-[propionyl-Coenzyme A-carboxylase (ATP-hydrolysing)] ligase) | -1.26 | 0.022983 | 0.999382 |
| <i>Vav1</i>      | vav 1 oncogene                                                                                  | -1.26 | 0.042746 | 0.999382 |
| <i>H2-K1</i>     | histocompatibility 2, K1, K region                                                              | -1.26 | 0.011047 | 0.999382 |
| <i>Noc3l</i>     | nucleolar complex associated 3 homolog ( <i>S. cerevisiae</i> )                                 | -1.26 | 0.038744 | 0.999382 |
| <i>Sh2d1b2</i>   | SH2 domain containing 1B2                                                                       | -1.25 | 0.040008 | 0.999382 |
| <i>Olf1118</i>   | olfactory receptor 1118                                                                         | -1.25 | 0.048651 | 0.999382 |
| <i>Lcn12</i>     | lipocalin 12                                                                                    | -1.25 | 0.027423 | 0.999382 |
| <i>Actrt2</i>    | actin-related protein T2                                                                        | -1.25 | 0.043292 | 0.999382 |
| <i>Csn1s2a</i>   | casein alpha s2-like A                                                                          | -1.25 | 0.02018  | 0.999382 |
| <i>Tbl2</i>      | transducin (beta)-like 2                                                                        | -1.25 | 0.035342 | 0.999382 |
| <i>Ccl26</i>     | chemokine (C-C motif) ligand 26                                                                 | -1.25 | 0.008751 | 0.999382 |
| <i>Vmn1r120</i>  | vomer nasal 1 receptor 120                                                                      | -1.25 | 0.017167 | 0.999382 |
| <i>Olf67</i>     | olfactory receptor 67                                                                           | -1.25 | 0.010153 | 0.999382 |
| <i>Slc18a1</i>   | solute carrier family 18 (vesicular monoamine), member 1                                        | -1.25 | 0.016371 | 0.999382 |
| <i>Hemk1</i>     | HemK methyltransferase family member 1                                                          | -1.25 | 0.03928  | 0.999382 |
| <i>Ptchd1</i>    | patched domain containing 1                                                                     | -1.25 | 0.044279 | 0.999382 |
| <i>Zfp946</i>    | zinc finger protein 946                                                                         | -1.25 | 0.00431  | 0.97863  |
| <i>Zfp804a</i>   | zinc finger protein 804A                                                                        | -1.24 | 0.030547 | 0.999382 |
| <i>Rabl6</i>     | RAB, member RAS oncogene family-like 6                                                          | -1.24 | 0.029594 | 0.999382 |

|                 |                                                               |       |          |          |
|-----------------|---------------------------------------------------------------|-------|----------|----------|
| <i>Pde7a</i>    | phosphodiesterase 7A                                          | -1.24 | 0.042076 | 0.999382 |
| <i>Actr3b</i>   | ARP3 actin-related protein 3B                                 | -1.24 | 0.04937  | 0.999382 |
| <i>Tctn2</i>    | tectonic family member 2                                      | -1.24 | 0.004393 | 0.97863  |
| <i>Tmem233</i>  | transmembrane protein 233                                     | -1.24 | 0.027821 | 0.999382 |
| <i>Sh2d6</i>    | SH2 domain containing 6                                       | -1.24 | 0.012651 | 0.999382 |
| <i>Arhgap25</i> | Rho GTPase activating protein 25                              | -1.24 | 0.032078 | 0.999382 |
| <i>Olfr483</i>  | olfactory receptor 483                                        | -1.24 | 0.040136 | 0.999382 |
| <i>Spag11b</i>  | sperm associated antigen 11B                                  | -1.24 | 0.049113 | 0.999382 |
| <i>Polb</i>     | polymerase (DNA directed), beta                               | -1.24 | 0.046595 | 0.999382 |
| <i>Impg1</i>    | interphotoreceptor matrix proteoglycan 1                      | -1.24 | 0.040978 | 0.999382 |
| <i>Ptprk</i>    | protein tyrosine phosphatase, receptor type, K                | -1.24 | 0.010798 | 0.999382 |
| <i>Ssh2</i>     | slingshot homolog 2 (Drosophila)                              | -1.24 | 0.015066 | 0.999382 |
| <i>Hoxc6</i>    | homeobox C6                                                   | -1.24 | 0.003308 | 0.973966 |
| <i>Chd1</i>     | chromodomain helicase DNA binding protein 1                   | -1.24 | 0.049422 | 0.999382 |
| <i>Rorb</i>     | RAR-related orphan receptor beta                              | -1.24 | 0.028472 | 0.999382 |
| <i>Cytip</i>    | cytohesin 1 interacting protein                               | -1.23 | 0.032549 | 0.999382 |
| <i>Slc30a7</i>  | solute carrier family 30 (zinc transporter), member 7         | -1.23 | 0.040657 | 0.999382 |
| <i>Ept1</i>     | ethanolaminephosphotransferase 1 (CDP-ethanolamine-specific)  | -1.23 | 0.035073 | 0.999382 |
| <i>Cpa4</i>     | carboxypeptidase A4                                           | -1.23 | 0.045562 | 0.999382 |
| <i>Iqgap1</i>   | IQ motif containing GTPase activating protein 1               | -1.23 | 0.037357 | 0.999382 |
| <i>Ciapin1</i>  | cytokine induced apoptosis inhibitor 1                        | -1.23 | 0.01962  | 0.999382 |
| <i>Kars</i>     | lysyl-tRNA synthetase                                         | -1.23 | 0.008314 | 0.999382 |
| <i>Olfr24</i>   | olfactory receptor 24                                         | -1.23 | 0.037363 | 0.999382 |
| <i>Tmsb15a</i>  | thymosin beta 15a                                             | -1.23 | 0.039086 | 0.999382 |
| <i>Dram1</i>    | DNA-damage regulated autophagy modulator 1                    | -1.23 | 0.006764 | 0.999382 |
| <i>Mgl2</i>     | macrophage galactose N-acetyl-galactosamine specific lectin 2 | -1.23 | 0.029116 | 0.999382 |
| <i>Atp13a4</i>  | ATPase type 13A4                                              | -1.23 | 0.021112 | 0.999382 |
| <i>Rcan2</i>    | regulator of calcineurin 2                                    | -1.23 | 0.018608 | 0.999382 |
| <i>Teddm1b</i>  | transmembrane epididymal protein 1B                           | -1.22 | 0.007626 | 0.999382 |
| <i>Aph1a</i>    | anterior pharynx defective 1a homolog (C. elegans)            | -1.22 | 0.015357 | 0.999382 |
| <i>Fgr</i>      | Gardner-Rasheed feline sarcoma viral (Fgr) oncogene homolog   | -1.22 | 0.013762 | 0.999382 |
| <i>Phf14</i>    | PHD finger protein 14                                         | -1.22 | 0.006528 | 0.999382 |
| <i>Ninj2</i>    | ninjurin 2                                                    | -1.22 | 0.033224 | 0.999382 |
| <i>Nars2</i>    | asparaginyl-tRNA synthetase 2 (mitochondrial)(putative)       | -1.22 | 0.048381 | 0.999382 |
| <i>Fiz1</i>     | Flt3 interacting zinc finger protein 1                        | -1.22 | 0.04375  | 0.999382 |
| <i>Cpt1c</i>    | carnitine palmitoyltransferase 1c                             | -1.22 | 0.020694 | 0.999382 |

|                |                                                                                                                                 |       |          |          |
|----------------|---------------------------------------------------------------------------------------------------------------------------------|-------|----------|----------|
| <i>Obox2</i>   | oocyte specific homeobox 2                                                                                                      | -1.22 | 0.038665 | 0.999382 |
| <i>Ces1d</i>   | carboxylesterase 1D                                                                                                             | -1.22 | 0.023325 | 0.999382 |
| <i>Olf151</i>  | olfactory receptor 151                                                                                                          | -1.22 | 0.015779 | 0.999382 |
| <i>Sik2</i>    | salt inducible kinase 2                                                                                                         | -1.22 | 0.010134 | 0.999382 |
| <i>Herc4</i>   | hect domain and RLD 4                                                                                                           | -1.22 | 0.012903 | 0.999382 |
| <i>Ccdc28a</i> | coiled-coil domain containing 28A                                                                                               | -1.22 | 0.039236 | 0.999382 |
| <i>Armc7</i>   | armadillo repeat containing 7                                                                                                   | -1.22 | 0.042341 | 0.999382 |
| <i>Syce3</i>   | synaptonemal complex central element protein 3                                                                                  | -1.22 | 0.022962 | 0.999382 |
| <i>Wdr24</i>   | WD repeat domain 24                                                                                                             | -1.22 | 0.000653 | 0.834085 |
| <i>Cd14</i>    | CD14 antigen                                                                                                                    | -1.22 | 0.037904 | 0.999382 |
| <i>Taf5</i>    | TAF5 RNA polymerase II, TATA box binding protein (TBP)-associated factor                                                        | -1.22 | 0.013119 | 0.999382 |
| <i>Thnsl1</i>  | threonine synthase-like 1 (bacterial)                                                                                           | -1.21 | 0.000346 | 0.834085 |
| <i>Ppig</i>    | peptidyl-prolyl isomerase G (cyclophilin G)                                                                                     | -1.21 | 0.044484 | 0.999382 |
| <i>Mavs</i>    | mitochondrial antiviral signaling protein                                                                                       | -1.21 | 0.027322 | 0.999382 |
| <i>Zfp932</i>  | zinc finger protein 932                                                                                                         | -1.21 | 0.011423 | 0.999382 |
| <i>Mmab</i>    | methylmalonic aciduria (cobalamin deficiency) type B homolog (human)                                                            | -1.21 | 0.033079 | 0.999382 |
| <i>Tspan33</i> | tetraspanin 33                                                                                                                  | -1.21 | 0.039637 | 0.999382 |
| <i>Wee2</i>    | WEE1 homolog 2 ( <i>S. pombe</i> )                                                                                              | -1.21 | 0.035948 | 0.999382 |
| <i>Zfp638</i>  | zinc finger protein 638                                                                                                         | -1.21 | 0.041766 | 0.999382 |
| <i>Mtmr14</i>  | myotubularin related protein 14                                                                                                 | -1.21 | 0.030807 | 0.999382 |
| <i>Arpc4</i>   | actin related protein 2/3 complex, subunit 4                                                                                    | -1.21 | 0.015535 | 0.999382 |
| <i>Zfp109</i>  | zinc finger protein 109                                                                                                         | -1.21 | 0.002402 | 0.913123 |
| <i>Slco3a1</i> | solute carrier organic anion transporter family, member 3a1                                                                     | -1.21 | 0.022122 | 0.999382 |
| <i>Mmp21</i>   | matrix metalloproteinase 21                                                                                                     | -1.21 | 0.034139 | 0.999382 |
| <i>Nek1</i>    | NIMA (never in mitosis gene a)-related expressed kinase 1                                                                       | -1.21 | 0.040678 | 0.999382 |
| <i>Ptcd2</i>   | pentatricopeptide repeat domain 2                                                                                               | -1.21 | 0.046667 | 0.999382 |
| <i>E4f1</i>    | E4F transcription factor 1                                                                                                      | -1.21 | 0.007995 | 0.999382 |
| <i>Cdc25c</i>  | cell division cycle 25C                                                                                                         | -1.21 | 0.001277 | 0.834085 |
| <i>Fam126b</i> | family with sequence similarity 126, member B                                                                                   | -1.2  | 0.01615  | 0.999382 |
| <i>Sema4a</i>  | sema domain, immunoglobulin domain (Ig), transmembrane domain (TM) and short cytoplasmic domain, (semaphorin) 4A; microRNA 7011 | -1.2  | 0.040821 | 0.999382 |
| <i>Snx30</i>   | sorting nexin family member 30                                                                                                  | -1.2  | 0.036039 | 0.999382 |
| <i>Pigo</i>    | phosphatidylinositol glycan anchor biosynthesis, class O                                                                        | -1.2  | 0.040416 | 0.999382 |
| <i>Cfap57</i>  | cilia and flagella associated protein 57                                                                                        | -1.2  | 0.041298 | 0.999382 |
| <i>Klf3</i>    | Kruppel-like factor 3 (basic)                                                                                                   | -1.2  | 0.037389 | 0.999382 |

|                 |                                                                             |       |          |          |
|-----------------|-----------------------------------------------------------------------------|-------|----------|----------|
| <i>Slc8b1</i>   | solute carrier family 8<br>(sodium/lithium/calcium exchanger),<br>member B1 | -1.2  | 0.034924 | 0.999382 |
| <i>Zfp771</i>   | zinc finger protein 771                                                     | -1.2  | 0.006084 | 0.999382 |
| <i>Ubxn8</i>    | UBX domain protein 8                                                        | -1.2  | 0.029138 | 0.999382 |
| <i>Sidt2</i>    | SID1 transmembrane family, member 2                                         | -1.2  | 0.017623 | 0.999382 |
| <i>Zfp449</i>   | zinc finger protein 449                                                     | -1.2  | 0.030208 | 0.999382 |
| <i>Ankrd36</i>  | ankyrin repeat domain 36                                                    | -1.2  | 0.047961 | 0.999382 |
| <i>Acly</i>     | ATP citrate lyase                                                           | -1.2  | 0.047216 | 0.999382 |
| <i>Pcdhb18</i>  | protocadherin beta 18                                                       | -1.2  | 0.030174 | 0.999382 |
| <i>Pm20d1</i>   | peptidase M20 domain containing 1                                           | -1.19 | 0.01186  | 0.999382 |
| <i>Edem3</i>    | ER degradation enhancer, mannosidase<br>alpha-like 3                        | -1.19 | 0.003369 | 0.973966 |
| <i>Pdk1</i>     | pyruvate dehydrogenase kinase, isoenzyme<br>1                               | -1.19 | 0.013678 | 0.999382 |
| <i>Cdca8</i>    | cell division cycle associated 8                                            | -1.19 | 0.026365 | 0.999382 |
| <i>Nudc</i>     | nuclear distribution gene C homolog<br>(Aspergillus)                        | -1.19 | 0.044253 | 0.999382 |
| <i>Sgsm1</i>    | small G protein signaling modulator 1                                       | -1.19 | 0.007608 | 0.999382 |
| <i>Cabp1</i>    | calcium binding protein 1                                                   | -1.19 | 0.027152 | 0.999382 |
| <i>Vamp8</i>    | vesicle-associated membrane protein 8                                       | -1.19 | 0.049516 | 0.999382 |
| <i>Nrip3</i>    | nuclear receptor interacting protein 3                                      | -1.19 | 0.023122 | 0.999382 |
| <i>Olf905</i>   | olfactory receptor 905                                                      | -1.19 | 0.011161 | 0.999382 |
| <i>Mrpl55</i>   | mitochondrial ribosomal protein L55                                         | -1.19 | 0.001661 | 0.834085 |
| <i>Zkscan3</i>  | zinc finger with KRAB and SCAN domains 3                                    | -1.19 | 0.029962 | 0.999382 |
| <i>Ltb4r2</i>   | leukotriene B4 receptor 2                                                   | -1.19 | 0.044996 | 0.999382 |
| <i>Cnih1</i>    | cornichon homolog 1 (Drosophila)                                            | -1.19 | 0.01659  | 0.999382 |
| <i>Glis2</i>    | GLIS family zinc finger 2                                                   | -1.19 | 0.044609 | 0.999382 |
| <i>Sdf2l1</i>   | stromal cell-derived factor 2-like 1                                        | -1.19 | 0.011917 | 0.999382 |
| <i>Pkmyt1</i>   | protein kinase, membrane associated<br>tyrosine/threonine 1                 | -1.19 | 0.008199 | 0.999382 |
| <i>Cyp2c69</i>  | cytochrome P450, family 2, subfamily c,<br>polypeptide 69                   | -1.19 | 0.049611 | 0.999382 |
| <i>Pign</i>     | phosphatidylinositol glycan anchor<br>biosynthesis, class N                 | -1.18 | 0.042513 | 0.999382 |
| <i>Sohlh1</i>   | spermatogenesis and oogenesis specific<br>basic helix-loop-helix 1          | -1.18 | 0.017    | 0.999382 |
| <i>Ugt8a</i>    | UDP galactosyltransferase 8A                                                | -1.18 | 0.021486 | 0.999382 |
| <i>Vmn1r179</i> | vomeroneasal 1 receptor 179                                                 | -1.18 | 0.006035 | 0.999382 |
| <i>Capns1</i>   | calpain, small subunit 1                                                    | -1.18 | 0.025655 | 0.999382 |
| <i>Col4a1</i>   | collagen, type IV, alpha 1                                                  | -1.18 | 0.018713 | 0.999382 |
| <i>Olf287</i>   | olfactory receptor 287                                                      | -1.18 | 0.020662 | 0.999382 |
| <i>Cd320</i>    | CD320 antigen                                                               | -1.18 | 0.003803 | 0.97863  |
| <i>Amy1</i>     | amylase 1, salivary                                                         | -1.17 | 0.028922 | 0.999382 |
| <i>Cpsf3l</i>   | cleavage and polyadenylation specific factor<br>3-like                      | -1.17 | 0.043805 | 0.999382 |

|                 |                                                                                    |       |          |          |
|-----------------|------------------------------------------------------------------------------------|-------|----------|----------|
| <i>Olf1337</i>  | olfactory receptor 1337                                                            | -1.17 | 0.001785 | 0.834811 |
| <i>Vmn1r88</i>  | vomeronal 1 receptor, 88                                                           | -1.17 | 0.009012 | 0.999382 |
| <i>Cracr2b</i>  | calcium release activated channel regulator 2B                                     | -1.17 | 0.007229 | 0.999382 |
| <i>Rab20</i>    | RAB20, member RAS oncogene family                                                  | -1.17 | 0.008762 | 0.999382 |
| <i>Lztfl1</i>   | leucine zipper transcription factor-like 1                                         | -1.17 | 0.048809 | 0.999382 |
| <i>Rtn4ip1</i>  | reticulon 4 interacting protein 1                                                  | -1.17 | 0.020885 | 0.999382 |
| <i>Efna2</i>    | ephrin A2                                                                          | -1.17 | 0.048618 | 0.999382 |
| <i>Hils1</i>    | histone H1-like protein in spermatids 1                                            | -1.17 | 0.032248 | 0.999382 |
| <i>Lrrc26</i>   | leucine rich repeat containing 26                                                  | -1.16 | 0.016655 | 0.999382 |
| <i>Slc35f6</i>  | solute carrier family 35, member F6; microRNA 5625                                 | -1.16 | 0.004443 | 0.97863  |
| <i>Gal3st4</i>  | galactose-3-O-sulfotransferase 4                                                   | -1.16 | 0.033625 | 0.999382 |
| <i>Mpv17l2</i>  | MPV17 mitochondrial membrane protein-like 2                                        | -1.16 | 0.047278 | 0.999382 |
| <i>Fig4</i>     | FIG4 homolog ( <i>S. cerevisiae</i> )                                              | -1.16 | 0.046062 | 0.999382 |
| <i>Sall2</i>    | sal-like 2 ( <i>Drosophila</i> )                                                   | -1.16 | 0.012073 | 0.999382 |
| <i>Nos1ap</i>   | nitric oxide synthase 1 (neuronal) adaptor protein                                 | -1.15 | 0.047064 | 0.999382 |
| <i>Gpatch4</i>  | G patch domain containing 4                                                        | -1.15 | 0.020827 | 0.999382 |
| <i>Ufsp1</i>    | UFM1-specific peptidase 1                                                          | -1.15 | 0.009798 | 0.999382 |
| <i>Casd1</i>    | CAS1 domain containing 1                                                           | -1.15 | 0.041019 | 0.999382 |
| <i>Cln3</i>     | ceroid lipofuscinosis, neuronal 3, juvenile (Batten, Spielmeier-Vogt disease)      | -1.15 | 0.033153 | 0.999382 |
| <i>Upf3a</i>    | UPF3 regulator of nonsense transcripts homolog A (yeast)                           | -1.15 | 0.000096 | 0.710567 |
| <i>Mcm3ap</i>   | minichromosome maintenance deficient 3 ( <i>S. cerevisiae</i> ) associated protein | -1.15 | 0.017598 | 0.999382 |
| <i>Irf1</i>     | interferon regulatory factor 1                                                     | -1.15 | 0.017224 | 0.999382 |
| <i>Olf288</i>   | olfactory receptor 288                                                             | -1.15 | 0.020902 | 0.999382 |
| <i>Qk</i>       | quaking                                                                            | -1.15 | 0.048548 | 0.999382 |
| <i>Ammecr1l</i> | AMME chromosomal region gene 1-like                                                | -1.15 | 0.028363 | 0.999382 |
| <i>Pggt1b</i>   | protein geranylgeranyltransferase type I, beta subunit                             | -1.15 | 0.00929  | 0.999382 |
| <i>Rbm45</i>    | RNA binding motif protein 45                                                       | -1.14 | 0.002498 | 0.913123 |
| <i>Unc5c</i>    | unc-5 homolog C ( <i>C. elegans</i> )                                              | -1.14 | 0.026368 | 0.999382 |
| <i>Tas2r117</i> | taste receptor, type 2, member 117                                                 | -1.14 | 0.006141 | 0.999382 |
| <i>Tmem25</i>   | transmembrane protein 25                                                           | -1.14 | 0.02549  | 0.999382 |
| <i>Maged2</i>   | melanoma antigen, family D, 2                                                      | -1.14 | 0.042975 | 0.999382 |
| <i>Tifab</i>    | TRAF-interacting protein with forkhead-associated domain, family member B          | -1.14 | 0.014329 | 0.999382 |
| <i>Atad1</i>    | ATPase family, AAA domain containing 1                                             | -1.14 | 0.031971 | 0.999382 |
| <i>Setd7</i>    | SET domain containing (lysine methyltransferase) 7                                 | -1.13 | 0.045328 | 0.999382 |
| <i>Lmtk2</i>    | lemur tyrosine kinase 2                                                            | -1.13 | 0.026747 | 0.999382 |

|                 |                                                              |       |          |          |
|-----------------|--------------------------------------------------------------|-------|----------|----------|
| <i>Crebl2</i>   | cAMP responsive element binding protein-like 2               | -1.13 | 0.049203 | 0.999382 |
| <i>Olf493</i>   | olfactory receptor 493                                       | -1.13 | 0.014465 | 0.999382 |
| <i>Herpud2</i>  | HERPUD family member 2                                       | -1.13 | 0.028611 | 0.999382 |
| <i>Snrnp48</i>  | small nuclear ribonucleoprotein 48 (U11/U12)                 | -1.13 | 0.044927 | 0.999382 |
| <i>Ppp1r7</i>   | protein phosphatase 1, regulatory (inhibitor) subunit 7      | -1.12 | 0.046437 | 0.999382 |
| <i>Spint5</i>   | serine protease inhibitor, Kunitz type 5                     | -1.12 | 0.043364 | 0.999382 |
| <i>Bglap2</i>   | bone gamma-carboxylglutamate protein 2                       | -1.12 | 0.036483 | 0.999382 |
| <i>Map3k6</i>   | mitogen-activated protein kinase kinase kinase 6             | -1.12 | 0.000724 | 0.834085 |
| <i>Letm2</i>    | leucine zipper-EF-hand containing transmembrane protein 2    | -1.12 | 0.048478 | 0.999382 |
| <i>Cnot7</i>    | CCR4-NOT transcription complex, subunit 7                    | -1.12 | 0.024491 | 0.999382 |
| <i>Il1rapl1</i> | interleukin 1 receptor accessory protein-like 1              | -1.12 | 0.033572 | 0.999382 |
| <i>Ppil6</i>    | peptidylprolyl isomerase (cyclophilin)-like 6                | -1.12 | 0.047549 | 0.999382 |
| <i>Klhl11</i>   | kelch-like 11                                                | -1.12 | 0.031527 | 0.999382 |
| <i>Rin3</i>     | Ras and Rab interactor 3                                     | -1.12 | 0.023024 | 0.999382 |
| <i>Fam135b</i>  | family with sequence similarity 135, member B                | -1.12 | 0.015562 | 0.999382 |
| <i>Zfyve27</i>  | zinc finger, FYVE domain containing 27                       | -1.12 | 0.038613 | 0.999382 |
| <i>Wt1</i>      | Wilms tumor 1 homolog                                        | -1.11 | 0.037337 | 0.999382 |
| <i>Tmem160</i>  | transmembrane protein 160                                    | -1.11 | 0.030671 | 0.999382 |
| <i>March_6</i>  | membrane-associated ring finger (C3HC4) 6                    | -1.11 | 0.016886 | 0.999382 |
| <i>Stxbp3</i>   | syntaxin binding protein 3                                   | -1.1  | 0.049926 | 0.999382 |
| <i>Gtf2ird1</i> | general transcription factor II I repeat domain-containing 1 | -1.1  | 0.017004 | 0.999382 |
| <i>Olf881</i>   | olfactory receptor 881                                       | -1.1  | 0.024902 | 0.999382 |
| <i>Mocs3</i>    | molybdenum cofactor synthesis 3                              | -1.09 | 0.015159 | 0.999382 |
| <i>Stau1</i>    | staufen (RNA binding protein) homolog 1 (Drosophila)         | -1.09 | 0.043662 | 0.999382 |
| <i>Tex10</i>    | testis expressed gene 10                                     | -1.09 | 0.042794 | 0.999382 |
| <i>Ulk2</i>     | unc-51 like kinase 2                                         | -1.09 | 0.047283 | 0.999382 |
| <i>Serinc5</i>  | serine incorporator 5                                        | -1.09 | 0.02269  | 0.999382 |
| <i>Zc3h7a</i>   | zinc finger CCCH type containing 7 A                         | -1.09 | 0.032093 | 0.999382 |
| <i>Acss2</i>    | acyl-CoA synthetase short-chain family member 2              | -1.08 | 0.036992 | 0.999382 |
| <i>Qk</i>       | quaking                                                      | -1.08 | 0.04436  | 0.999382 |
| <i>Baz2b</i>    | bromodomain adjacent to zinc finger domain, 2B               | -1.07 | 0.035883 | 0.999382 |
| <i>Arl3</i>     | ADP-ribosylation factor-like 3                               | -1.06 | 0.046431 | 0.999382 |

**Table S8- Genes upregulated in the Striatum of Ala92-Dio2 mice. (p<0.05)**

| Gene Symbol      | Description                                               | Fold Change (linear) (AA Str vs. TT Str) | ANOVA p-value (AA Str vs. TT Str) | FDR p-value (AA Str vs. TT Str) |
|------------------|-----------------------------------------------------------|------------------------------------------|-----------------------------------|---------------------------------|
| <i>Rbbp5</i>     | retinoblastoma binding protein 5                          | 1.07                                     | 0.032942                          | 0.999844                        |
| <i>Fam175b</i>   | family with sequence similarity 175, member B             | 1.09                                     | 0.043189                          | 0.999844                        |
| <i>Fev</i>       | FEV (ETS oncogene family)                                 | 1.1                                      | 0.03287                           | 0.999844                        |
| <i>Tmod1</i>     | tropomodulin 1                                            | 1.1                                      | 0.006985                          | 0.999844                        |
| <i>Defa-rs10</i> | defensin, alpha, related sequence 10                      | 1.11                                     | 0.026761                          | 0.999844                        |
| <i>Ube2d2b</i>   | ubiquitin-conjugating enzyme E2D 2B                       | 1.12                                     | 0.020075                          | 0.999844                        |
| <i>Olf458</i>    | olfactory receptor 458                                    | 1.12                                     | 0.045915                          | 0.999844                        |
| <i>Aipl1</i>     | aryl hydrocarbon receptor-interacting protein-like 1      | 1.12                                     | 0.034178                          | 0.999844                        |
| <i>Adad1</i>     | adenosine deaminase domain containing 1 (testis specific) | 1.13                                     | 0.015202                          | 0.999844                        |
| <i>F7</i>        | coagulation factor VII                                    | 1.13                                     | 0.018205                          | 0.999844                        |
| <i>Stambp</i>    | STAM binding protein                                      | 1.14                                     | 0.017066                          | 0.999844                        |
| <i>Zmynd8</i>    | zinc finger, MYND-type containing 8                       | 1.14                                     | 0.03782                           | 0.999844                        |
| <i>Clec4f</i>    | C-type lectin domain family 4, member f                   | 1.14                                     | 0.030637                          | 0.999844                        |
| <i>Fktn</i>      | fukutin                                                   | 1.15                                     | 0.0409                            | 0.999844                        |
| <i>Myl6b</i>     | myosin, light polypeptide 6B                              | 1.15                                     | 0.0167                            | 0.999844                        |
| <i>Vit</i>       | vitrin                                                    | 1.16                                     | 0.033024                          | 0.999844                        |
| <i>Cldn34b3</i>  | claudin 34B3                                              | 1.16                                     | 0.032574                          | 0.999844                        |
| <i>Tmem71</i>    | transmembrane protein 71                                  | 1.16                                     | 0.035344                          | 0.999844                        |
| <i>Aptx</i>      | aprataxin                                                 | 1.17                                     | 0.00026                           | 0.995461                        |
| <i>Ints7</i>     | integrator complex subunit 7                              | 1.17                                     | 0.028237                          | 0.999844                        |
| <i>Kif22</i>     | kinesin family member 22                                  | 1.17                                     | 0.026221                          | 0.999844                        |
| <i>Mtfmt</i>     | mitochondrial methionyl-tRNA formyltransferase            | 1.17                                     | 0.036422                          | 0.999844                        |
| <i>Mbd6</i>      | methyl-CpG binding domain protein 6                       | 1.18                                     | 0.039123                          | 0.999844                        |
| <i>Mapk14</i>    | mitogen-activated protein kinase 14                       | 1.18                                     | 0.021668                          | 0.999844                        |
| <i>Dnah9</i>     | dynein, axonemal, heavy chain 9                           | 1.19                                     | 0.027428                          | 0.999844                        |
| <i>Zfp661</i>    | zinc finger protein 661                                   | 1.19                                     | 0.040294                          | 0.999844                        |
| <i>Ppp1r3b</i>   | protein phosphatase 1, regulatory (inhibitor) subunit 3B  | 1.19                                     | 0.001341                          | 0.999844                        |
| <i>Epha6</i>     | Eph receptor A6                                           | 1.19                                     | 0.043851                          | 0.999844                        |
| <i>Cluap1</i>    | clusterin associated protein 1                            | 1.19                                     | 0.047028                          | 0.999844                        |
| <i>Ablim3</i>    | actin binding LIM protein family, member 3                | 1.2                                      | 0.032827                          | 0.999844                        |
| <i>Sncaip</i>    | synuclein, alpha interacting protein (synphilin)          | 1.2                                      | 0.04428                           | 0.999844                        |
| <i>Mfsd7b</i>    | major facilitator superfamily domain containing 7B        | 1.2                                      | 0.029065                          | 0.999844                        |



|                |                                                                                       |      |          |          |
|----------------|---------------------------------------------------------------------------------------|------|----------|----------|
| <i>Olf348</i>  | olfactory receptor 348                                                                | 1.2  | 0.033051 | 0.999844 |
| <i>Gjb5</i>    | gap junction protein, beta 5                                                          | 1.2  | 0.011567 | 0.999844 |
| <i>Pigv</i>    | phosphatidylinositol glycan anchor biosynthesis, class V                              | 1.2  | 0.031609 | 0.999844 |
| <i>Mcm7</i>    | minichromosome maintenance deficient 7 (S. cerevisiae); microRNA 93; microRNA 25      | 1.2  | 0.027527 | 0.999844 |
| <i>Zfp212</i>  | Zinc finger protein 212                                                               | 1.2  | 0.040473 | 0.999844 |
| <i>Hspbap1</i> | Hspb associated protein 1                                                             | 1.2  | 0.027092 | 0.999844 |
| <i>H1foo</i>   | H1 histone family, member O, oocyte-specific                                          | 1.21 | 0.016012 | 0.999844 |
| <i>Tbc1d16</i> | TBC1 domain family, member 16                                                         | 1.21 | 0.006411 | 0.999844 |
| <i>Ercc4</i>   | excision repair cross-complementing rodent repair deficiency, complementation group 4 | 1.21 | 0.043145 | 0.999844 |
| <i>Il18bp</i>  | interleukin 18 binding protein                                                        | 1.21 | 0.049729 | 0.999844 |
| <i>Olf800</i>  | olfactory receptor 800                                                                | 1.21 | 0.022408 | 0.999844 |
| <i>Ccl7</i>    | chemokine (C-C motif) ligand 7                                                        | 1.21 | 0.016285 | 0.999844 |
| <i>Gbp2b</i>   | guanylate binding protein 2b; guanylate binding protein 5                             | 1.22 | 0.036322 | 0.999844 |
| <i>Thbd</i>    | thrombomodulin                                                                        | 1.22 | 0.012012 | 0.999844 |
| <i>Fbxl2</i>   | F-box and leucine-rich repeat protein 2                                               | 1.22 | 0.00288  | 0.999844 |
| <i>Zfp647</i>  | zinc finger protein 647                                                               | 1.22 | 0.040251 | 0.999844 |
| <i>Pla2g15</i> | phospholipase A2, group XV                                                            | 1.23 | 0.002875 | 0.999844 |
| <i>Acox1</i>   | acyl-Coenzyme A oxidase 1, palmitoyl                                                  | 1.23 | 0.027159 | 0.999844 |
| <i>Lipt1</i>   | lipoyltransferase 1                                                                   | 1.23 | 0.001655 | 0.999844 |
| <i>Wwtr1</i>   | WW domain containing transcription regulator 1                                        | 1.23 | 0.005874 | 0.999844 |
| <i>Angptl8</i> | angiopoietin-like 8                                                                   | 1.23 | 0.02325  | 0.999844 |
| <i>Ankrd49</i> | ankyrin repeat domain 49                                                              | 1.23 | 0.046555 | 0.999844 |
| <i>Dcxr</i>    | dicarbonyl L-xylulose reductase                                                       | 1.23 | 0.007193 | 0.999844 |
| <i>Olf1461</i> | olfactory receptor 1461                                                               | 1.23 | 0.030318 | 0.999844 |
| <i>Adrb1</i>   | adrenergic receptor, beta 1                                                           | 1.23 | 0.016222 | 0.999844 |
| <i>Atp2b3</i>  | ATPase, Ca <sup>++</sup> transporting, plasma membrane 3                              | 1.24 | 0.018374 | 0.999844 |
| <i>Abcc4</i>   | ATP-binding cassette, sub-family C (CFTR/MRP), member 4                               | 1.24 | 0.00427  | 0.999844 |
| <i>Drd3</i>    | dopamine receptor D3                                                                  | 1.24 | 0.025696 | 0.999844 |
| <i>Thnsl1</i>  | threonine synthase-like 1 (bacterial)                                                 | 1.24 | 0.015789 | 0.999844 |
| <i>Scnn1g</i>  | sodium channel, nonvoltage-gated 1 gamma                                              | 1.24 | 0.004225 | 0.999844 |
| <i>Egfl8</i>   | EGF-like domain 8                                                                     | 1.24 | 0.04041  | 0.999844 |
| <i>Myo9b</i>   | myosin IXb                                                                            | 1.25 | 0.015329 | 0.999844 |
| <i>Olf1020</i> | olfactory receptor 1020                                                               | 1.25 | 0.045867 | 0.999844 |
| <i>Nelfcd</i>  | negative elongation factor complex member C/D, Th1l                                   | 1.25 | 0.02368  | 0.999844 |
| <i>Spata21</i> | spermatogenesis associated 21                                                         | 1.25 | 0.033601 | 0.999844 |
| <i>Zfp157</i>  | zinc finger protein 157                                                               | 1.25 | 0.028641 | 0.999844 |

|                  |                                                                                                                  |      |          |          |
|------------------|------------------------------------------------------------------------------------------------------------------|------|----------|----------|
| <i>Podxl2</i>    | podocalyxin-like 2                                                                                               | 1.25 | 0.024145 | 0.999844 |
| <i>Mrgprb8</i>   | MAS-related GPR, member B8                                                                                       | 1.25 | 0.002513 | 0.999844 |
| <i>Chrdl2</i>    | chordin-like 2                                                                                                   | 1.25 | 0.014194 | 0.999844 |
| <i>Olf145</i>    | olfactory receptor 145                                                                                           | 1.25 | 0.044243 | 0.999844 |
| <i>Zfp810</i>    | zinc finger protein 810                                                                                          | 1.25 | 0.016917 | 0.999844 |
| <i>Tgfb3</i>     | transforming growth factor, beta 3                                                                               | 1.25 | 0.026887 | 0.999844 |
| <i>Usp14</i>     | ubiquitin specific peptidase 14                                                                                  | 1.25 | 0.00441  | 0.999844 |
| <i>Rufy2</i>     | RUN and FYVE domain-containing 2                                                                                 | 1.26 | 0.044706 | 0.999844 |
| <i>Cldn6</i>     | claudin 6                                                                                                        | 1.26 | 0.042767 | 0.999844 |
| <i>Tmed1</i>     | transmembrane emp24 domain containing 1                                                                          | 1.26 | 0.015144 | 0.999844 |
| <i>Rnf148</i>    | ring finger protein 148                                                                                          | 1.26 | 0.037788 | 0.999844 |
| <i>Suclg2</i>    | succinate-Coenzyme A ligase, GDP-forming, beta subunit                                                           | 1.26 | 0.045404 | 0.999844 |
| <i>Zfp511</i>    | zinc finger protein 511                                                                                          | 1.26 | 0.046504 | 0.999844 |
| <i>Olf895</i>    | olfactory receptor 895                                                                                           | 1.26 | 0.007782 | 0.999844 |
| <i>Cebpe</i>     | CCAAT/enhancer binding protein (C/EBP), epsilon                                                                  | 1.26 | 0.030074 | 0.999844 |
| <i>Anxa6</i>     | annexin A6                                                                                                       | 1.27 | 0.044121 | 0.999844 |
| <i>Fam189a2</i>  | family with sequence similarity 189, member A2                                                                   | 1.27 | 0.046635 | 0.999844 |
| <i>Adar</i>      | adenosine deaminase, RNA-specific                                                                                | 1.27 | 0.038041 | 0.999844 |
| <i>Vmn2r65</i>   | vomer nasal 2, receptor 65                                                                                       | 1.27 | 0.027842 | 0.999844 |
| <i>Mvb12a</i>    | multivesicular body subunit 12A                                                                                  | 1.27 | 0.048752 | 0.999844 |
| <i>Inpp4b</i>    | inositol polyphosphate-4-phosphatase, type II                                                                    | 1.27 | 0.019141 | 0.999844 |
| <i>Cysl1r1</i>   | cysteinyl leukotriene receptor 1                                                                                 | 1.27 | 0.020751 | 0.999844 |
| <i>Gba2</i>      | glucosidase beta 2                                                                                               | 1.28 | 0.042969 | 0.999844 |
| <i>Serpinb12</i> | serine (or cysteine) peptidase inhibitor, clade B (ovalbumin), member 12                                         | 1.28 | 0.03929  | 0.999844 |
| <i>Rab3gap2</i>  | RAB3 GTPase activating protein subunit 2                                                                         | 1.28 | 0.042567 | 0.999844 |
| <i>Sema4c</i>    | sema domain, immunoglobulin domain (Ig), transmembrane domain (TM) and short cytoplasmic domain, (semaphorin) 4C | 1.28 | 0.047549 | 0.999844 |
| <i>Cfap61</i>    | cilia and flagella associated protein 61                                                                         | 1.28 | 0.037963 | 0.999844 |
| <i>Snpc4</i>     | small nuclear RNA activating complex, polypeptide 4                                                              | 1.28 | 0.000165 | 0.995461 |
| <i>Igsf10</i>    | immunoglobulin superfamily, member 10                                                                            | 1.28 | 0.019709 | 0.999844 |
| <i>Slc6a13</i>   | solute carrier family 6 (neurotransmitter transporter, GABA), member 13                                          | 1.28 | 0.03764  | 0.999844 |
| <i>Decr2</i>     | 2-4-dienoyl-Coenzyme A reductase 2, peroxisomal                                                                  | 1.29 | 0.047619 | 0.999844 |
| <i>Pms2</i>      | postmeiotic segregation increased 2 (S. cerevisiae)                                                              | 1.29 | 0.036853 | 0.999844 |
| <i>Xrra1</i>     | X-ray radiation resistance associated 1                                                                          | 1.29 | 0.039053 | 0.999844 |
| <i>Olf533</i>    | olfactory receptor 533                                                                                           | 1.29 | 0.030266 | 0.999844 |
| <i>Hbq1a</i>     | hemoglobin, theta 1A                                                                                             | 1.29 | 0.019139 | 0.999844 |

|                  |                                                                                                                |      |          |          |
|------------------|----------------------------------------------------------------------------------------------------------------|------|----------|----------|
| <i>Lpar3</i>     | lysophosphatidic acid receptor 3                                                                               | 1.3  | 0.039761 | 0.999844 |
| <i>Armc9</i>     | armadillo repeat containing 9                                                                                  | 1.3  | 0.017536 | 0.999844 |
| <i>Acy1</i>      | aminoacylase 1                                                                                                 | 1.3  | 0.045437 | 0.999844 |
| <i>Gon4l</i>     | gon-4-like (C.elegans)                                                                                         | 1.3  | 0.015212 | 0.999844 |
| <i>Mmab</i>      | methylmalonic aciduria (cobalamin deficiency) type B homolog (human)                                           | 1.3  | 0.02984  | 0.999844 |
| <i>Olf2r291</i>  | olfactory receptor 291                                                                                         | 1.3  | 0.042471 | 0.999844 |
| <i>Msandd4</i>   | Myb/SANT-like DNA-binding domain containing 4 with coiled-coils                                                | 1.3  | 0.028524 | 0.999844 |
| <i>Baiap2l2</i>  | BAI1-associated protein 2-like 2                                                                               | 1.3  | 0.025657 | 0.999844 |
| <i>Cyp1b1</i>    | cytochrome P450, family 1, subfamily b, polypeptide 1                                                          | 1.3  | 0.047202 | 0.999844 |
| <i>Tnfaip8</i>   | tumor necrosis factor, alpha-induced protein 8                                                                 | 1.3  | 0.020319 | 0.999844 |
| <i>Wbscr22</i>   | Williams Beuren syndrome chromosome region 22                                                                  | 1.31 | 0.023443 | 0.999844 |
| <i>Nr2c2</i>     | nuclear receptor subfamily 2, group C, member 2                                                                | 1.31 | 0.038283 | 0.999844 |
| <i>Rad52</i>     | RAD52 homolog (S. cerevisiae)                                                                                  | 1.31 | 0.03826  | 0.999844 |
| <i>Mlkl</i>      | mixed lineage kinase domain-like                                                                               | 1.31 | 0.008612 | 0.999844 |
| <i>Ankrd54</i>   | ankyrin repeat domain 54                                                                                       | 1.31 | 0.025359 | 0.999844 |
| <i>Nr3c1</i>     | nuclear receptor subfamily 3, group C, member 1                                                                | 1.31 | 0.031124 | 0.999844 |
| <i>Tmem114</i>   | transmembrane protein 114                                                                                      | 1.32 | 0.025121 | 0.999844 |
| <i>Hhat</i>      | hedgehog acyltransferase                                                                                       | 1.32 | 0.009689 | 0.999844 |
| <i>Prrx2</i>     | paired related homeobox 2                                                                                      | 1.32 | 0.036238 | 0.999844 |
| <i>Olf2r1246</i> | olfactory receptor 1246                                                                                        | 1.32 | 0.02804  | 0.999844 |
| <i>Ripply2</i>   | rippy2 homolog (zebrafish)                                                                                     | 1.32 | 0.014869 | 0.999844 |
| <i>Wbp2</i>      | WW domain binding protein 2                                                                                    | 1.32 | 0.038847 | 0.999844 |
| <i>Olf2r729</i>  | olfactory receptor 729                                                                                         | 1.33 | 0.034198 | 0.999844 |
| <i>Fig4</i>      | FIG4 homolog (S. cerevisiae)                                                                                   | 1.33 | 0.014664 | 0.999844 |
| <i>Sdpr</i>      | serum deprivation response                                                                                     | 1.33 | 0.030934 | 0.999844 |
| <i>Sema3a</i>    | sema domain, immunoglobulin domain (Ig), short basic domain, secreted, (semaphorin) 3A                         | 1.33 | 0.024511 | 0.999844 |
| <i>Vmn1r130</i>  | vomer nasal 1 receptor 130; vomer nasal 1 receptor 178; vomer nasal 1 receptor 165; vomer nasal 1 receptor 155 | 1.33 | 0.029767 | 0.999844 |
| <i>Ddi1</i>      | DDI1, DNA-damage inducible 1, homolog 1 (S. cerevisiae)                                                        | 1.33 | 0.045611 | 0.999844 |
| <i>Mapkapk3</i>  | mitogen-activated protein kinase-activated protein kinase 3                                                    | 1.33 | 0.045403 | 0.999844 |
| <i>Ngfr</i>      | nerve growth factor receptor (TNFR superfamily, member 16)                                                     | 1.33 | 0.014128 | 0.999844 |
| <i>Abhd12b</i>   | abhydrolase domain containing 12B                                                                              | 1.33 | 0.044482 | 0.999844 |
| <i>Kcnd3</i>     | potassium voltage-gated channel, Shal-related family, member 3                                                 | 1.34 | 0.026765 | 0.999844 |

|                 |                                                              |      |          |          |
|-----------------|--------------------------------------------------------------|------|----------|----------|
| <i>Adprh</i>    | ADP-ribosylarginine hydrolase                                | 1.34 | 0.012514 | 0.999844 |
| <i>Dennd1b</i>  | DENN/MADD domain containing 1B                               | 1.34 | 0.049821 | 0.999844 |
| <i>Map2k5</i>   | mitogen-activated protein kinase kinase 5                    | 1.34 | 0.007473 | 0.999844 |
| <i>Sharpin</i>  | SHANK-associated RH domain interacting protein               | 1.34 | 0.03007  | 0.999844 |
| <i>Cacna1e</i>  | calcium channel, voltage-dependent, R type, alpha 1E subunit | 1.34 | 0.01669  | 0.999844 |
| <i>Mctp1</i>    | multiple C2 domains, transmembrane 1                         | 1.34 | 0.017675 | 0.999844 |
| <i>Fabp12</i>   | fatty acid binding protein 12                                | 1.34 | 0.044167 | 0.999844 |
| <i>Muc5b</i>    | mucin 5, subtype B, tracheobronchial                         | 1.34 | 0.038286 | 0.999844 |
| <i>Adam26b</i>  | a disintegrin and metallopeptidase domain 26B                | 1.34 | 0.03425  | 0.999844 |
| <i>Nxpe4</i>    | neurexophilin and PC-esterase domain family, member 4        | 1.34 | 0.034511 | 0.999844 |
| <i>Iqch</i>     | IQ motif containing H                                        | 1.34 | 0.036991 | 0.999844 |
| <i>Tmed3</i>    | transmembrane emp24 domain containing 3                      | 1.34 | 0.02607  | 0.999844 |
| <i>Cdc6</i>     | cell division cycle 6                                        | 1.34 | 0.019379 | 0.999844 |
| <i>Incenp</i>   | inner centromere protein                                     | 1.34 | 0.038931 | 0.999844 |
| <i>Gpr85</i>    | G protein-coupled receptor 85                                | 1.35 | 0.038157 | 0.999844 |
| <i>Ssbp4</i>    | single stranded DNA binding protein 4                        | 1.35 | 0.024181 | 0.999844 |
| <i>Blvrb</i>    | biliverdin reductase B (flavin reductase (NADPH))            | 1.35 | 0.032846 | 0.999844 |
| <i>Dot1l</i>    | DOT1-like, histone H3 methyltransferase (S. cerevisiae)      | 1.35 | 0.023106 | 0.999844 |
| <i>Ccdc144b</i> | coiled-coil domain containing 144B                           | 1.35 | 0.023824 | 0.999844 |
| <i>Zfp560</i>   | zinc finger protein 560                                      | 1.35 | 0.033891 | 0.999844 |
| <i>Usp44</i>    | ubiquitin specific peptidase 44                              | 1.35 | 0.04271  | 0.999844 |
| <i>Grap</i>     | GRB2-related adaptor protein                                 | 1.35 | 0.00498  | 0.999844 |
| <i>Il17rd</i>   | interleukin 17 receptor D                                    | 1.35 | 0.002657 | 0.999844 |
| <i>Chmp3</i>    | charged multivesicular body protein 3                        | 1.36 | 0.023421 | 0.999844 |
| <i>Ptgfr</i>    | prostaglandin F receptor                                     | 1.36 | 0.007606 | 0.999844 |
| <i>Rnf6</i>     | ring finger protein (C3H2C3 type) 6                          | 1.36 | 0.035533 | 0.999844 |
| <i>Acsm2</i>    | acyl-CoA synthetase medium-chain family member 2             | 1.36 | 0.024718 | 0.999844 |
| <i>Xdh</i>      | xanthine dehydrogenase                                       | 1.36 | 0.013941 | 0.999844 |
| <i>Olf419</i>   | olfactory receptor 419                                       | 1.37 | 0.010657 | 0.999844 |
| <i>Gapvd1</i>   | GTPase activating protein and VPS9 domains 1                 | 1.37 | 0.040172 | 0.999844 |
| <i>Olf1209</i>  | olfactory receptor 1209                                      | 1.37 | 0.02601  | 0.999844 |
| <i>Fam65a</i>   | family with sequence similarity 65, member A; microRNA 1966  | 1.37 | 0.031999 | 0.999844 |
| <i>Rbpms</i>    | RNA binding protein gene with multiple splicing              | 1.37 | 0.016494 | 0.999844 |
| <i>Ralgap2</i>  | Ral GTPase activating protein, alpha subunit 2 (catalytic)   | 1.38 | 0.01811  | 0.999844 |
| <i>Pla2g2c</i>  | phospholipase A2, group IIC                                  | 1.38 | 0.005594 | 0.999844 |

|                 |                                                                           |      |          |          |
|-----------------|---------------------------------------------------------------------------|------|----------|----------|
| <i>Ccdc157</i>  | coiled-coil domain containing 157                                         | 1.38 | 0.03439  | 0.999844 |
| <i>Bbof1</i>    | basal body orientation factor 1                                           | 1.38 | 0.045819 | 0.999844 |
| <i>Ap5s1</i>    | adaptor-related protein 5 complex, sigma 1 subunit                        | 1.39 | 0.007963 | 0.999844 |
| <i>Ulk3</i>     | unc-51-like kinase 3                                                      | 1.39 | 0.035714 | 0.999844 |
| <i>Usp2</i>     | ubiquitin specific peptidase 2                                            | 1.39 | 0.041774 | 0.999844 |
| <i>Lpl</i>      | lipoprotein lipase                                                        | 1.39 | 0.04946  | 0.999844 |
| <i>Ankrd42</i>  | ankyrin repeat domain 42                                                  | 1.39 | 0.030757 | 0.999844 |
| <i>Rnf167</i>   | ring finger protein 167                                                   | 1.4  | 0.012878 | 0.999844 |
| <i>Ackr2</i>    | atypical chemokine receptor 2                                             | 1.4  | 0.023652 | 0.999844 |
| <i>Hs6st2</i>   | heparan sulfate 6-O-sulfotransferase 2                                    | 1.4  | 0.049115 | 0.999844 |
| <i>Ifi30</i>    | interferon gamma inducible protein 30                                     | 1.4  | 0.022826 | 0.999844 |
| <i>Nek3</i>     | NIMA (never in mitosis gene a)-related expressed kinase 3                 | 1.41 | 0.013026 | 0.999844 |
| <i>Dio1</i>     | deiodinase, iodothyronine, type I                                         | 1.41 | 0.018843 | 0.999844 |
| <i>Slc2a9</i>   | solute carrier family 2 (facilitated glucose transporter), member 9       | 1.41 | 0.041919 | 0.999844 |
| <i>Cdyl</i>     | chromodomain protein, Y chromosome-like                                   | 1.41 | 0.047131 | 0.999844 |
| <i>Rhod</i>     | ras homolog gene family, member D                                         | 1.41 | 0.012877 | 0.999844 |
| <i>Sirt7</i>    | sirtuin 7; microRNA 6936                                                  | 1.42 | 0.027932 | 0.999844 |
| <i>Sgcz</i>     | sarcoglycan zeta                                                          | 1.42 | 0.029771 | 0.999844 |
| <i>Spg11</i>    | spastic paraplegia 11                                                     | 1.42 | 0.037346 | 0.999844 |
| <i>Hspa4l</i>   | heat shock protein 4 like                                                 | 1.42 | 0.029248 | 0.999844 |
| <i>Tas2r137</i> | taste receptor, type 2, member 137                                        | 1.42 | 0.022299 | 0.999844 |
| <i>Zkscan17</i> | zinc finger with KRAB and SCAN domains 17                                 | 1.42 | 0.028708 | 0.999844 |
| <i>Stap2</i>    | signal transducing adaptor family member 2                                | 1.42 | 0.004035 | 0.999844 |
| <i>Prrg4</i>    | proline rich Gla (G-carboxyglutamic acid) 4 (transmembrane)               | 1.43 | 0.037175 | 0.999844 |
| <i>Slc6a6</i>   | solute carrier family 6 (neurotransmitter transporter, taurine), member 6 | 1.43 | 0.007491 | 0.999844 |
| <i>Iqca</i>     | IQ motif containing with AAA domain                                       | 1.43 | 0.031967 | 0.999844 |
| <i>Slc4a11</i>  | solute carrier family 4, sodium bicarbonate transporter-like, member 11   | 1.44 | 0.041058 | 0.999844 |
| <i>Tmem72</i>   | transmembrane protein 72                                                  | 1.44 | 0.040926 | 0.999844 |
| <i>Zfp563</i>   | zinc finger protein 563                                                   | 1.44 | 0.045379 | 0.999844 |
| <i>Vmn1r233</i> | vomer nasal 1 receptor 233                                                | 1.44 | 0.013946 | 0.999844 |
| <i>Calca</i>    | calcitonin/calcitonin-related polypeptide, alpha                          | 1.45 | 0.002224 | 0.999844 |
| <i>Vash2</i>    | vasohibin 2                                                               | 1.45 | 0.015374 | 0.999844 |
| <i>Rfc3</i>     | replication factor C (activator 1) 3                                      | 1.45 | 0.020421 | 0.999844 |
| <i>Hamp2</i>    | hepcidin antimicrobial peptide 2                                          | 1.45 | 0.00359  | 0.999844 |
| <i>Ccdc189</i>  | coiled-coil domain containing 189                                         | 1.45 | 0.04488  | 0.999844 |
| <i>Cercam</i>   | cerebral endothelial cell adhesion molecule                               | 1.46 | 0.001042 | 0.999844 |
| <i>Phactr3</i>  | phosphatase and actin regulator 3                                         | 1.46 | 0.032581 | 0.999844 |

|                |                                                                               |      |          |          |
|----------------|-------------------------------------------------------------------------------|------|----------|----------|
| <i>Ttc30a2</i> | tetratricopeptide repeat domain 30A2;<br>tetratricopeptide repeat domain 30A1 | 1.46 | 0.0135   | 0.999844 |
| <i>Ascl3</i>   | achaete-scute complex homolog 3<br>(Drosophila)                               | 1.46 | 0.015729 | 0.999844 |
| <i>Ndp</i>     | Norrie disease (pseudoglioma) (human)                                         | 1.46 | 0.038693 | 0.999844 |
| <i>Taar7a</i>  | trace amine-associated receptor 7A                                            | 1.46 | 0.044872 | 0.999844 |
| <i>Bok</i>     | BCL2-related ovarian killer                                                   | 1.47 | 0.024975 | 0.999844 |
| <i>Uck2</i>    | uridine-cytidine kinase 2                                                     | 1.47 | 0.048201 | 0.999844 |
| <i>Ano6</i>    | anoctamin 6                                                                   | 1.47 | 0.048806 | 0.999844 |
| <i>Cyp2c55</i> | cytochrome P450, family 2, subfamily c,<br>polypeptide 55                     | 1.47 | 0.01781  | 0.999844 |
| <i>Hspb1</i>   | heat shock protein 1                                                          | 1.48 | 0.01017  | 0.999844 |
| <i>Abtb1</i>   | ankyrin repeat and BTB (POZ) domain<br>containing 1                           | 1.48 | 0.030294 | 0.999844 |
| <i>L3mbt1</i>  | l(3)mbt-like (Drosophila)                                                     | 1.48 | 0.024605 | 0.999844 |
| <i>Olf1039</i> | olfactory receptor 1039                                                       | 1.48 | 0.030311 | 0.999844 |
| <i>Enho</i>    | energy homeostasis associated                                                 | 1.48 | 0.013119 | 0.999844 |
| <i>Eqtn</i>    | equatorin, sperm acrosome associated                                          | 1.48 | 0.040191 | 0.999844 |
| <i>Il13ra2</i> | interleukin 13 receptor, alpha 2                                              | 1.48 | 0.012296 | 0.999844 |
| <i>Mmp14</i>   | matrix metalloproteinase 14 (membrane-<br>inserted)                           | 1.48 | 0.019233 | 0.999844 |
| <i>Olf127</i>  | olfactory receptor 127                                                        | 1.49 | 0.001149 | 0.999844 |
| <i>Asb11</i>   | ankyrin repeat and SOCS box-containing 11                                     | 1.49 | 0.013224 | 0.999844 |
| <i>Olf60</i>   | olfactory receptor 60                                                         | 1.49 | 0.034789 | 0.999844 |
| <i>Chaf1b</i>  | chromatin assembly factor 1, subunit B<br>(p60)                               | 1.49 | 0.033647 | 0.999844 |
| <i>Dnah11</i>  | dynein, axonemal, heavy chain 11                                              | 1.5  | 0.00608  | 0.999844 |
| <i>Ebp</i>     | phenylalkylamine Ca <sup>2+</sup> antagonist<br>(emopamil) binding protein    | 1.5  | 0.013788 | 0.999844 |
| <i>Gphb5</i>   | glycoprotein hormone beta 5                                                   | 1.5  | 0.045231 | 0.999844 |
| <i>Cyp2j13</i> | cytochrome P450, family 2, subfamily j,<br>polypeptide 13                     | 1.5  | 0.047814 | 0.999844 |
| <i>Zc2hc1c</i> | zinc finger, C2HC-type containing 1C                                          | 1.5  | 0.043842 | 0.999844 |
| <i>Zbtb3</i>   | zinc finger and BTB domain containing 3                                       | 1.5  | 0.04011  | 0.999844 |
| <i>Sgms2</i>   | sphingomyelin synthase 2                                                      | 1.51 | 0.024533 | 0.999844 |
| <i>Dpp7</i>    | dipeptidylpeptidase 7                                                         | 1.51 | 0.025643 | 0.999844 |
| <i>Mak</i>     | male germ cell-associated kinase                                              | 1.52 | 0.047341 | 0.999844 |
| <i>Kif27</i>   | kinesin family member 27; microRNA 6369                                       | 1.52 | 0.049078 | 0.999844 |
| <i>Olf651</i>  | olfactory receptor 651                                                        | 1.52 | 0.010045 | 0.999844 |
| <i>Pgap3</i>   | post-GPI attachment to proteins 3                                             | 1.53 | 0.006769 | 0.999844 |
| <i>F13b</i>    | coagulation factor XIII, beta subunit                                         | 1.53 | 0.039231 | 0.999844 |
| <i>Gml</i>     | glycosylphosphatidylinositol anchored<br>molecule like                        | 1.53 | 0.041023 | 0.999844 |
| <i>Hic2</i>    | hypermethylated in cancer 2                                                   | 1.53 | 0.046653 | 0.999844 |
| <i>Mcmdc2</i>  | minichromosome maintenance domain<br>containing 2                             | 1.54 | 0.018975 | 0.999844 |
| <i>Metap1</i>  | methionyl aminopeptidase 1                                                    | 1.54 | 0.032645 | 0.999844 |

|                |                                                                                                         |      |          |          |
|----------------|---------------------------------------------------------------------------------------------------------|------|----------|----------|
| <i>Cramp1l</i> | Crm, cramped-like (Drosophila)                                                                          | 1.54 | 0.048907 | 0.999844 |
| <i>Adgrf2</i>  | adhesion G protein-coupled receptor F2                                                                  | 1.54 | 0.000385 | 0.995461 |
| <i>Gemin2</i>  | gem (nuclear organelle) associated protein 2                                                            | 1.55 | 0.04113  | 0.999844 |
| <i>Il9</i>     | interleukin 9                                                                                           | 1.55 | 0.035714 | 0.999844 |
| <i>Brwd3</i>   | bromodomain and WD repeat domain containing 3                                                           | 1.56 | 0.032265 | 0.999844 |
| <i>Asic3</i>   | acid-sensing (proton-gated) ion channel 3                                                               | 1.56 | 0.034888 | 0.999844 |
| <i>Zfp941</i>  | zinc finger protein 941                                                                                 | 1.56 | 0.00641  | 0.999844 |
| <i>Ngly1</i>   | N-glycanase 1                                                                                           | 1.56 | 0.034583 | 0.999844 |
| <i>Tsku</i>    | tsukushi, small leucine rich proteoglycan                                                               | 1.57 | 0.031072 | 0.999844 |
| <i>Glb1l2</i>  | galactosidase, beta 1-like 2                                                                            | 1.57 | 0.027659 | 0.999844 |
| <i>Aff2</i>    | AF4/FMR2 family, member 2                                                                               | 1.57 | 0.036643 | 0.999844 |
| <i>Adck5</i>   | aarF domain containing kinase 5                                                                         | 1.57 | 0.032281 | 0.999844 |
| <i>Neurl1b</i> | neuralized E3 ubiquitin protein ligase 1B                                                               | 1.57 | 0.038875 | 0.999844 |
| <i>Efcab1</i>  | EF hand calcium binding domain 1                                                                        | 1.58 | 0.012681 | 0.999844 |
| <i>Tm4sf1</i>  | transmembrane 4 superfamily member 1                                                                    | 1.58 | 0.038307 | 0.999844 |
| <i>Oxgr1</i>   | oxoglutarate (alpha-ketoglutarate) receptor 1                                                           | 1.58 | 0.002067 | 0.999844 |
| <i>Lrriq1</i>  | leucine-rich repeats and IQ motif containing 1                                                          | 1.58 | 0.023476 | 0.999844 |
| <i>Thap2</i>   | THAP domain containing, apoptosis associated protein 2                                                  | 1.59 | 0.00043  | 0.995461 |
| <i>Prl2b1</i>  | prolactin family 2, subfamily b, member 1                                                               | 1.59 | 0.010374 | 0.999844 |
| <i>Slc29a4</i> | solute carrier family 29 (nucleoside transporters), member 4                                            | 1.6  | 0.038602 | 0.999844 |
| <i>Mapkbp1</i> | mitogen-activated protein kinase binding protein 1                                                      | 1.6  | 0.038926 | 0.999844 |
| <i>Ccdc60</i>  | coiled-coil domain containing 60                                                                        | 1.6  | 0.033908 | 0.999844 |
| <i>Pnmal1</i>  | PNMA-like 1                                                                                             | 1.6  | 0.038931 | 0.999844 |
| <i>Abhd14b</i> | abhydrolase domain containing 14b                                                                       | 1.61 | 0.032313 | 0.999844 |
| <i>Scrib</i>   | scribbled homolog (Drosophila)                                                                          | 1.62 | 0.025306 | 0.999844 |
| <i>Mettl1</i>  | methyltransferase like 1                                                                                | 1.62 | 0.002538 | 0.999844 |
| <i>Scnn1a</i>  | sodium channel, nonvoltage-gated 1 alpha                                                                | 1.62 | 0.01814  | 0.999844 |
| <i>Mettl8</i>  | methyltransferase like 8                                                                                | 1.62 | 0.01465  | 0.999844 |
| <i>Ephb2</i>   | Eph receptor B2                                                                                         | 1.62 | 0.04295  | 0.999844 |
| <i>Cdk20</i>   | cyclin-dependent kinase 20                                                                              | 1.64 | 0.013639 | 0.999844 |
| <i>Ido1</i>    | indoleamine 2,3-dioxygenase 1                                                                           | 1.66 | 0.035729 | 0.999844 |
| <i>Prmt6</i>   | protein arginine N-methyltransferase 6                                                                  | 1.66 | 0.034744 | 0.999844 |
| <i>Trim68</i>  | tripartite motif-containing 68                                                                          | 1.67 | 0.046315 | 0.999844 |
| <i>Vgll3</i>   | vestigial like 3 (Drosophila)                                                                           | 1.67 | 0.048696 | 0.999844 |
| <i>Zfp831</i>  | zinc finger protein 831                                                                                 | 1.68 | 0.002258 | 0.999844 |
| <i>Ulk4</i>    | unc-51-like kinase 4                                                                                    | 1.68 | 0.04547  | 0.999844 |
| <i>Muc3a</i>   | mucin 3A, cell surface associated<br>[Source:MGI Symbol;Acc:MGI:3588263];<br>RIKEN cDNA A630081J09 gene | 1.69 | 0.027882 | 0.999844 |
| <i>Capsl</i>   | calcyphosine-like                                                                                       | 1.7  | 0.024805 | 0.999844 |

|                  |                                                                                    |      |          |          |
|------------------|------------------------------------------------------------------------------------|------|----------|----------|
| <i>Rab11fip1</i> | RAB11 family interacting protein 1 (class I)                                       | 1.71 | 0.009326 | 0.999844 |
| <i>Cxcl13</i>    | chemokine (C-X-C motif) ligand 13                                                  | 1.72 | 0.017979 | 0.999844 |
| <i>Bzrap1</i>    | benzodiazepine receptor associated protein 1                                       | 1.76 | 0.00037  | 0.995461 |
| <i>Tceanc2</i>   | transcription elongation factor A (SII) N-terminal and central domain containing 2 | 1.77 | 0.041668 | 0.999844 |
| <i>Nek10</i>     | NIMA (never in mitosis gene a)- related kinase 10                                  | 1.78 | 0.002918 | 0.999844 |
| <i>Pcdhb8</i>    | protocadherin beta 8                                                               | 1.78 | 0.046011 | 0.999844 |
| <i>Dlx2</i>      | distal-less homeobox 2                                                             | 1.79 | 0.013249 | 0.999844 |
| <i>Cfap69</i>    | cilia and flagella associated protein 69                                           | 1.81 | 0.020964 | 0.999844 |
| <i>Stra6</i>     | stimulated by retinoic acid gene 6                                                 | 1.83 | 0.025498 | 0.999844 |
| <i>Ppp1r32</i>   | protein phosphatase 1, regulatory subunit 32                                       | 1.83 | 0.02278  | 0.999844 |
| <i>Clic6</i>     | chloride intracellular channel 6                                                   | 1.83 | 0.027654 | 0.999844 |
| <i>Agbl2</i>     | ATP/GTP binding protein-like 2                                                     | 1.84 | 0.033127 | 0.999844 |
| <i>Igfbp2</i>    | insulin-like growth factor binding protein 2                                       | 1.84 | 0.043121 | 0.999844 |
| <i>Tfrc</i>      | transferrin receptor                                                               | 1.86 | 0.027247 | 0.999844 |
| <i>Phactr2</i>   | phosphatase and actin regulator 2                                                  | 1.87 | 0.01784  | 0.999844 |
| <i>Sostdc1</i>   | sclerostin domain containing 1                                                     | 1.91 | 0.044514 | 0.999844 |
| <i>Dnah12</i>    | dynein, axonemal, heavy chain 12                                                   | 1.91 | 0.003507 | 0.999844 |
| <i>Fam221b</i>   | family with sequence similarity 221, member B                                      | 1.93 | 0.005176 | 0.999844 |
| <i>H2-DMb1</i>   | histocompatibility 2, class II, locus Mb1                                          | 1.95 | 0.00192  | 0.999844 |
| <i>Fam216b</i>   | family with sequence similarity 216, member B                                      | 1.96 | 0.039715 | 0.999844 |
| <i>Pltp</i>      | phospholipid transfer protein                                                      | 1.98 | 0.022416 | 0.999844 |
| <i>Aqp1</i>      | aquaporin 1                                                                        | 1.98 | 0.032662 | 0.999844 |
| <i>Pnma3</i>     | paraneoplastic antigen MA3                                                         | 2.02 | 0.030735 | 0.999844 |
| <i>Slc24a5</i>   | solute carrier family 24, member 5                                                 | 2.1  | 0.006324 | 0.999844 |
| <i>Prelp</i>     | proline arginine-rich end leucine-rich repeat                                      | 2.2  | 0.020632 | 0.999844 |
| <i>Slc13a4</i>   | solute carrier family 13 (sodium/sulfate symporters), member 4                     | 2.28 | 0.01243  | 0.999844 |
| <i>Igf2</i>      | insulin-like growth factor 2                                                       | 2.31 | 0.049152 | 0.999844 |
| <i>Slc14a2</i>   | solute carrier family 14 (urea transporter), member 2                              | 2.34 | 0.001727 | 0.999844 |
| <i>Drc7</i>      | dynein regulatory complex subunit 7                                                | 2.39 | 0.003817 | 0.999844 |
| <i>Slc2a12</i>   | solute carrier family 2 (facilitated glucose transporter), member 12               | 2.76 | 0.009565 | 0.999844 |
| <i>Folr1</i>     | folate receptor 1 (adult)                                                          | 3.75 | 0.034497 | 0.999844 |
| <i>Kl</i>        | klotho                                                                             | 4.06 | 0.017733 | 0.999844 |
| <i>Kcnj13</i>    | potassium inwardly-rectifying channel, subfamily J, member 13                      | 4.86 | 0.013447 | 0.999844 |
| <i>Cd59a</i>     | CD59a antigen                                                                      | 4.87 | 0.0051   | 0.999844 |
| <i>Lbp</i>       | lipopolysaccharide binding protein                                                 | 5.75 | 0.004043 | 0.999844 |



**Table S9- Genes downregulated in the Striatum of Ala92-Dio2 mice. (p<0.05)**

| Gene Symbol      | Description                                                                                                                                                                         | Fold Change (linear) (AA Str vs. TT Str) | ANOVA p-value (AA Str vs. TT Str) | FDR p-value (AA Str vs. TT Str) |
|------------------|-------------------------------------------------------------------------------------------------------------------------------------------------------------------------------------|------------------------------------------|-----------------------------------|---------------------------------|
| <i>Mup2</i>      | major urinary protein 2; major urinary protein 1                                                                                                                                    | -44.05                                   | 0.00089                           | 0.999844                        |
| <i>Mup1</i>      | major urinary protein 1                                                                                                                                                             | -40.95                                   | 0.000549                          | 0.999844                        |
| <i>Mup7</i>      | major urinary protein 7; major urinary protein 1                                                                                                                                    | -33.43                                   | 0.001898                          | 0.999844                        |
| <i>Mup2</i>      | major urinary protein 2; major urinary protein 10; major urinary protein 11; major urinary protein 1                                                                                | -32.66                                   | 0.001305                          | 0.999844                        |
| <i>Mup12</i>     | major urinary protein 12                                                                                                                                                            | -32.18                                   | 0.001691                          | 0.999844                        |
| <i>Mup13</i>     | major urinary protein 13; major urinary protein 18; major urinary protein 16; major urinary protein 14; major urinary protein 17; major urinary protein 2; major urinary protein 15 | -31.45                                   | 0.00141                           | 0.999844                        |
| <i>Mup19</i>     | major urinary protein 19                                                                                                                                                            | -24.18                                   | 0.001914                          | 0.999844                        |
| <i>Mup8</i>      | major urinary protein 8; major urinary protein 9; major urinary protein 2; major urinary protein 1                                                                                  | -16.82                                   | 0.002334                          | 0.999844                        |
| <i>Alb</i>       | albumin                                                                                                                                                                             | -16.22                                   | 0.007903                          | 0.999844                        |
| <i>Mup3</i>      | major urinary protein 3                                                                                                                                                             | -3.4                                     | 0.02485                           | 0.999844                        |
| <i>Mid1</i>      | midline 1                                                                                                                                                                           | -3.33                                    | 0.004704                          | 0.999844                        |
| <i>Mid1</i>      | midline 1                                                                                                                                                                           | -3.33                                    | 0.004704                          | 0.999844                        |
| <i>Serpina1c</i> | serine (or cysteine) peptidase inhibitor, clade A, member 1C                                                                                                                        | -2.99                                    | 0.039767                          | 0.999844                        |
| <i>Mid1</i>      | midline 1                                                                                                                                                                           | -2.63                                    | 0.010961                          | 0.999844                        |
| <i>Fga</i>       | fibrinogen alpha chain                                                                                                                                                              | -2.51                                    | 0.014157                          | 0.999844                        |
| <i>Mup21</i>     | major urinary protein 21                                                                                                                                                            | -2.46                                    | 0.020502                          | 0.999844                        |
| <i>Hp</i>        | haptoglobin                                                                                                                                                                         | -2.39                                    | 0.047759                          | 0.999844                        |
| <i>Btnl5-ps</i>  | butyrophilin-like 5, pseudogene                                                                                                                                                     | -2.36                                    | 0.02005                           | 0.999844                        |
| <i>Fgb</i>       | fibrinogen beta chain                                                                                                                                                               | -2.29                                    | 0.027021                          | 0.999844                        |
| <i>Olfir806</i>  | olfactory receptor 806                                                                                                                                                              | -2.28                                    | 0.012985                          | 0.999844                        |
| <i>Mrc1</i>      | mannose receptor, C type 1                                                                                                                                                          | -2.23                                    | 0.023339                          | 0.999844                        |
| <i>Olfir171</i>  | olfactory receptor 171                                                                                                                                                              | -2.21                                    | 0.017277                          | 0.999844                        |
| <i>Nts</i>       | neurotensin                                                                                                                                                                         | -2.11                                    | 0.042359                          | 0.999844                        |
| <i>Ces1c</i>     | carboxylesterase 1C                                                                                                                                                                 | -2.08                                    | 0.029178                          | 0.999844                        |
| <i>Serpina1b</i> | serine (or cysteine) peptidase inhibitor, clade A, member 1B                                                                                                                        | -2.05                                    | 0.04973                           | 0.999844                        |

|                  |                                                                                                                            |       |          |          |
|------------------|----------------------------------------------------------------------------------------------------------------------------|-------|----------|----------|
| <i>Serpina3m</i> | serine (or cysteine) peptidase inhibitor, clade A, member 3M; serine (or cysteine) peptidase inhibitor, clade A, member 3K | -2.04 | 0.005807 | 0.999844 |
| <i>Sel1l2</i>    | sel-1 suppressor of lin-12-like 2 (C. elegans)                                                                             | -2.02 | 0.036348 | 0.999844 |
| <i>Vmn1r7</i>    | vomeronasal 1 receptor 7                                                                                                   | -2.01 | 0.000117 | 0.995461 |
| <i>Olf878</i>    | olfactory receptor 878                                                                                                     | -2    | 0.00184  | 0.999844 |
| <i>Vmn1r112</i>  | vomeronasal 1 receptor 112                                                                                                 | -1.98 | 0.045961 | 0.999844 |
| <i>Mis18bp1</i>  | MIS18 binding protein 1                                                                                                    | -1.93 | 0.017065 | 0.999844 |
| <i>Akr1d1</i>    | aldo-keto reductase family 1, member D1                                                                                    | -1.91 | 0.033895 | 0.999844 |
| <i>Sly</i>       | Sycp3 like Y-linked                                                                                                        | -1.89 | 0.02236  | 0.999844 |
| <i>Ly6g5c</i>    | lymphocyte antigen 6 complex, locus G5C                                                                                    | -1.89 | 0.024857 | 0.999844 |
| <i>Tcl1b4</i>    | T cell leukemia/lymphoma 1B, 4                                                                                             | -1.88 | 0.00496  | 0.999844 |
| <i>Olf120</i>    | olfactory receptor 120                                                                                                     | -1.88 | 0.040882 | 0.999844 |
| <i>Adam5</i>     | a disintegrin and metallopeptidase domain 5                                                                                | -1.87 | 0.030141 | 0.999844 |
| <i>Il10</i>      | interleukin 10                                                                                                             | -1.86 | 0.036288 | 0.999844 |
| <i>Cpa3</i>      | carboxypeptidase A3, mast cell                                                                                             | -1.86 | 0.016961 | 0.999844 |
| <i>Chil4</i>     | chitinase-like 4                                                                                                           | -1.86 | 0.030993 | 0.999844 |
| <i>Enpp1</i>     | ectonucleotide pyrophosphatase/phosphodiesterase 1                                                                         | -1.85 | 0.006571 | 0.999844 |
| <i>Zc3h8</i>     | zinc finger CCCH type containing 8                                                                                         | -1.84 | 0.016866 | 0.999844 |
| <i>Vmn2r84</i>   | vomeronasal 2, receptor 84                                                                                                 | -1.82 | 0.039485 | 0.999844 |
| <i>Cyp2b19</i>   | cytochrome P450, family 2, subfamily b, polypeptide 19                                                                     | -1.82 | 0.033285 | 0.999844 |
| <i>Tinag</i>     | tubulointerstitial nephritis antigen                                                                                       | -1.81 | 0.03657  | 0.999844 |
| <i>Vmn1r29</i>   | vomeronasal 1 receptor 29                                                                                                  | -1.78 | 0.048289 | 0.999844 |
| <i>Tmed11</i>    | transmembrane emp24 protein transport domain containing                                                                    | -1.77 | 0.031571 | 0.999844 |
| <i>Hsd3b6</i>    | hydroxy-delta-5-steroid dehydrogenase, 3 beta- and steroid delta-isomerase 6                                               | -1.76 | 0.016156 | 0.999844 |
| <i>Daw1</i>      | dynein assembly factor with WDR repeat domains 1                                                                           | -1.72 | 0.014625 | 0.999844 |
| <i>Olf1262</i>   | olfactory receptor 1262                                                                                                    | -1.69 | 0.00101  | 0.999844 |
| <i>Ly6g6c</i>    | lymphocyte antigen 6 complex, locus G6C                                                                                    | -1.69 | 0.003301 | 0.999844 |
| <i>Insrr</i>     | insulin receptor-related receptor                                                                                          | -1.67 | 0.041692 | 0.999844 |
| <i>Olf898</i>    | olfactory receptor 898                                                                                                     | -1.66 | 0.00376  | 0.999844 |
| <i>Vsig2</i>     | V-set and immunoglobulin domain containing 2                                                                               | -1.66 | 0.049789 | 0.999844 |
| <i>Myl1</i>      | myosin, light polypeptide 1                                                                                                | -1.65 | 0.021762 | 0.999844 |

|                 |                                                                              |       |          |          |
|-----------------|------------------------------------------------------------------------------|-------|----------|----------|
| <i>Glyat</i>    | glycine-N-acyltransferase                                                    | -1.64 | 0.034816 | 0.999844 |
| <i>Olf923</i>   | olfactory receptor 923                                                       | -1.63 | 0.034449 | 0.999844 |
| <i>Cr2</i>      | complement receptor 2                                                        | -1.61 | 0.012564 | 0.999844 |
| <i>Fam114a2</i> | family with sequence similarity 114, member A2                               | -1.61 | 0.048775 | 0.999844 |
| <i>Neu4</i>     | sialidase 4                                                                  | -1.6  | 0.044102 | 0.999844 |
| <i>Hsd3b2</i>   | hydroxy-delta-5-steroid dehydrogenase, 3 beta- and steroid delta-isomerase 2 | -1.6  | 0.020407 | 0.999844 |
| <i>ApoH</i>     | apolipoprotein H                                                             | -1.6  | 0.043417 | 0.999844 |
| <i>Vmn2r9</i>   | vomer nasal 2, receptor 9                                                    | -1.59 | 0.031071 | 0.999844 |
| <i>Olf1098</i>  | olfactory receptor 1098                                                      | -1.58 | 0.026665 | 0.999844 |
| <i>Nmur2</i>    | neuromedin U receptor 2                                                      | -1.58 | 0.033744 | 0.999844 |
| <i>Prkcd</i>    | protein kinase C, delta                                                      | -1.58 | 0.048932 | 0.999844 |
| <i>Ippk</i>     | inositol 1,3,4,5,6-pentakisphosphate 2-kinase                                | -1.57 | 0.000194 | 0.995461 |
| <i>Ikbke</i>    | inhibitor of kappaB kinase epsilon                                           | -1.57 | 0.001018 | 0.999844 |
| <i>Olf285</i>   | olfactory receptor 285; olfactory receptor 257                               | -1.57 | 0.04608  | 0.999844 |
| <i>Vmn1r127</i> | vomer nasal 1 receptor 127                                                   | -1.56 | 0.031196 | 0.999844 |
| <i>Olf1340</i>  | olfactory receptor 1340                                                      | -1.55 | 0.008616 | 0.999844 |
| <i>Gk2</i>      | glycerol kinase 2                                                            | -1.55 | 0.038899 | 0.999844 |
| <i>Rtl1</i>     | retrotransposon-like 1; microRNA 3071                                        | -1.55 | 0.007906 | 0.999844 |
| <i>Nmu</i>      | neuromedin U                                                                 | -1.54 | 0.018835 | 0.999844 |
| <i>Klhl42</i>   | kelch-like 42                                                                | -1.54 | 0.00029  | 0.995461 |
| <i>Btf3</i>     | basic transcription factor 3                                                 | -1.54 | 0.030494 | 0.999844 |
| <i>Itfg2</i>    | integrin alpha FG-GAP repeat containing 2                                    | -1.53 | 0.01927  | 0.999844 |
| <i>Unc45b</i>   | unc-45 homolog B (C. elegans)                                                | -1.53 | 0.046683 | 0.999844 |
| <i>Ahrr</i>     | aryl-hydrocarbon receptor repressor                                          | -1.53 | 0.021427 | 0.999844 |
| <i>Zfp345</i>   | zinc finger protein 345                                                      | -1.52 | 0.004599 | 0.999844 |
| <i>Tmem27</i>   | transmembrane protein 27                                                     | -1.52 | 0.010603 | 0.999844 |
| <i>Ly6i</i>     | lymphocyte antigen 6 complex, locus I                                        | -1.52 | 0.029745 | 0.999844 |
| <i>Wfdc21</i>   | WAP four-disulfide core domain 21                                            | -1.51 | 0.033418 | 0.999844 |
| <i>Kdm6b</i>    | KDM1 lysine (K)-specific demethylase 6B                                      | -1.51 | 0.001927 | 0.999844 |
| <i>Atp13a3</i>  | ATPase type 13A3                                                             | -1.51 | 0.03165  | 0.999844 |
| <i>Esp38</i>    | exocrine gland secreted peptide 38                                           | -1.51 | 0.010932 | 0.999844 |
| <i>Ms4a6d</i>   | membrane-spanning 4-domains, subfamily A, member 6D                          | -1.51 | 0.018675 | 0.999844 |
| <i>Rgs6</i>     | regulator of G-protein signaling 6                                           | -1.5  | 0.009225 | 0.999844 |
| <i>Dnajc21</i>  | DnaJ (Hsp40) homolog, subfamily C, member 21                                 | -1.5  | 0.043173 | 0.999844 |

|                      |                                                                                                                                                                                 |       |          |          |
|----------------------|---------------------------------------------------------------------------------------------------------------------------------------------------------------------------------|-------|----------|----------|
| <i>Serpinc1</i>      | serine (or cysteine) peptidase inhibitor, clade C (antithrombin), member 1                                                                                                      | -1.5  | 0.028999 | 0.999844 |
| <i>Olf353</i>        | olfactory receptor 353                                                                                                                                                          | -1.5  | 0.043372 | 0.999844 |
| <i>4930572O03Rik</i> | spermatogenesis associated glutamate (E)-rich protein pseudogene                                                                                                                | -1.5  | 0.040058 | 0.999844 |
| <i>Hyal6</i>         | hyaluronoglucosaminidase 6                                                                                                                                                      | -1.5  | 0.011252 | 0.999844 |
| <i>Klkb1</i>         | kallikrein B, plasma 1; cytochrome P450, family 4, subfamily v, polypeptide 3                                                                                                   | -1.5  | 0.017699 | 0.999844 |
| <i>Nt5c1b</i>        | 5-nucleotidase, cytosolic IB; 5'-nucleotidase, cytosolic IB                                                                                                                     | -1.5  | 0.032456 | 0.999844 |
| <i>Tnfrsf12a</i>     | tumor necrosis factor receptor superfamily, member 12a                                                                                                                          | -1.49 | 0.015801 | 0.999844 |
| <i>Olf715</i>        | olfactory receptor 715                                                                                                                                                          | -1.49 | 0.016066 | 0.999844 |
| <i>Neu2</i>          | neuraminidase 2                                                                                                                                                                 | -1.49 | 0.035905 | 0.999844 |
| <i>S100a8</i>        | S100 calcium binding protein A8 (calgranulin A)                                                                                                                                 | -1.49 | 0.01161  | 0.999844 |
| <i>Speer4f2</i>      | spermatogenesis associated glutamate (E)-rich protein 4f2 [Source:MGI Symbol;Acc:MGI:3781672]; Novel spermatogenesis associated glutamate (E)-rich protein; predicted gene 3495 | -1.49 | 0.036568 | 0.999844 |
| <i>Cyp2e1</i>        | cytochrome P450, family 2, subfamily e, polypeptide 1                                                                                                                           | -1.49 | 0.03093  | 0.999844 |
| <i>Slc22a28</i>      | solute carrier family 22, member 28                                                                                                                                             | -1.49 | 0.019906 | 0.999844 |
| <i>Wdr27</i>         | WD repeat domain 27                                                                                                                                                             | -1.48 | 0.024631 | 0.999844 |
| <i>Plekha2</i>       | pleckstrin homology domain-containing, family A (phosphoinositide binding specific) member 2                                                                                    | -1.47 | 0.020115 | 0.999844 |
| <i>Col23a1</i>       | collagen, type XXIII, alpha 1                                                                                                                                                   | -1.47 | 0.017083 | 0.999844 |
| <i>Olf1219</i>       | olfactory receptor 1219                                                                                                                                                         | -1.47 | 0.030281 | 0.999844 |
| <i>Olf1154</i>       | olfactory receptor 1154                                                                                                                                                         | -1.47 | 0.043125 | 0.999844 |
| <i>Mgst1</i>         | microsomal glutathione S-transferase 1                                                                                                                                          | -1.47 | 0.013165 | 0.999844 |
| <i>Rassf8</i>        | Ras association (RalGDS/AF-6) domain family (N-terminal) member 8                                                                                                               | -1.47 | 0.011076 | 0.999844 |
| <i>Scgb1b20</i>      | secretoglobin, family 1B, member 20                                                                                                                                             | -1.47 | 0.018828 | 0.999844 |
| <i>Mettl18</i>       | methyltransferase like 18                                                                                                                                                       | -1.46 | 0.040925 | 0.999844 |
| <i>Nudt2</i>         | nudix (nucleoside diphosphate linked moiety X)-type motif 2                                                                                                                     | -1.46 | 0.047552 | 0.999844 |
| <i>Stra6l</i>        | STRA6-like                                                                                                                                                                      | -1.46 | 0.037435 | 0.999844 |

|                |                                                                                    |       |          |          |
|----------------|------------------------------------------------------------------------------------|-------|----------|----------|
| <i>Abcg3</i>   | ATP-binding cassette, sub-family G (WHITE), member 3                               | -1.46 | 0.023527 | 0.999844 |
| <i>Mtap7d3</i> | MAP7 domain containing 3                                                           | -1.46 | 0.027878 | 0.999844 |
| <i>Phka1</i>   | phosphorylase kinase alpha 1                                                       | -1.46 | 0.046998 | 0.999844 |
| <i>Fbxw17</i>  | F-box and WD-40 domain protein 17                                                  | -1.46 | 0.047933 | 0.999844 |
| <i>Rap2b</i>   | RAP2B, member of RAS oncogene family                                               | -1.45 | 0.036998 | 0.999844 |
| <i>P2ry14</i>  | purinergic receptor P2Y, G-protein coupled, 14; RIKEN cDNA F630111L10 gene         | -1.44 | 0.008622 | 0.999844 |
| <i>Vmn2r59</i> | vomer nasal 2, receptor 59                                                         | -1.44 | 0.02476  | 0.999844 |
| <i>Mettl7b</i> | methyltransferase like 7B                                                          | -1.44 | 0.010373 | 0.999844 |
| <i>Irf1</i>    | interferon regulatory factor 1                                                     | -1.43 | 0.042995 | 0.999844 |
| <i>Scnn1b</i>  | sodium channel, nonvoltage-gated 1 beta                                            | -1.43 | 0.023004 | 0.999844 |
| <i>Crb3</i>    | crumbs family member 3                                                             | -1.43 | 0.038927 | 0.999844 |
| <i>Aox2</i>    | aldehyde oxidase 2                                                                 | -1.43 | 0.043224 | 0.999844 |
| <i>Olfr243</i> | olfactory receptor 243                                                             | -1.43 | 0.002234 | 0.999844 |
| <i>Acsm1</i>   | acyl-CoA synthetase medium-chain family member 1                                   | -1.43 | 0.028452 | 0.999844 |
| <i>Olfr66</i>  | olfactory receptor 66                                                              | -1.43 | 0.015927 | 0.999844 |
| <i>Pycrl</i>   | pyrroline-5-carboxylate reductase-like                                             | -1.42 | 0.037597 | 0.999844 |
| <i>Ivl</i>     | involucrin                                                                         | -1.42 | 0.013185 | 0.999844 |
| <i>Samt1</i>   | spermatogenesis associated multipass transmembrane protein 1; predicted gene 15140 | -1.42 | 0.038931 | 0.999844 |
| <i>Spdl1</i>   | spindle apparatus coiled-coil protein 1                                            | -1.42 | 0.010784 | 0.999844 |
| <i>Cacng1</i>  | calcium channel, voltage-dependent, gamma subunit 1                                | -1.42 | 0.031974 | 0.999844 |
| <i>Lect1</i>   | leukocyte cell derived chemotaxin 1                                                | -1.42 | 0.01042  | 0.999844 |
| <i>Ifna6</i>   | interferon alpha 6; interferon alpha B                                             | -1.41 | 0.038886 | 0.999844 |
| <i>Tmem125</i> | transmembrane protein 125                                                          | -1.41 | 0.016088 | 0.999844 |
| <i>Pcdh9</i>   | protocadherin 9                                                                    | -1.41 | 0.02507  | 0.999844 |
| <i>Sptlc3</i>  | serine palmitoyltransferase, long chain base subunit 3                             | -1.4  | 0.034091 | 0.999844 |
| <i>Corin</i>   | corin                                                                              | -1.4  | 0.025666 | 0.999844 |
| <i>Mcm2</i>    | minichromosome maintenance deficient 2 mitotin ( <i>S. cerevisiae</i> )            | -1.4  | 0.007643 | 0.999844 |
| <i>Olfr531</i> | olfactory receptor 531                                                             | -1.4  | 0.04464  | 0.999844 |
| <i>Mettl22</i> | methyltransferase like 22                                                          | -1.4  | 0.025221 | 0.999844 |
| <i>Thrsp</i>   | thyroid hormone responsive                                                         | -1.39 | 0.014537 | 0.999844 |
| <i>Slc23a3</i> | solute carrier family 23 (nucleobase transporters), member 3                       | -1.39 | 0.049282 | 0.999844 |
| <i>Vmn2r5</i>  | vomer nasal 2, receptor 5                                                          | -1.39 | 0.028146 | 0.999844 |

|                 |                                                                                                              |       |          |          |
|-----------------|--------------------------------------------------------------------------------------------------------------|-------|----------|----------|
| <i>Defb50</i>   | defensin beta 50                                                                                             | -1.39 | 0.014063 | 0.999844 |
| <i>Kcnh8</i>    | potassium voltage-gated channel, subfamily H (eag-related), member 8                                         | -1.39 | 0.034233 | 0.999844 |
| <i>Trim36</i>   | tripartite motif-containing 36                                                                               | -1.39 | 0.031759 | 0.999844 |
| <i>Ccne1</i>    | cyclin E1                                                                                                    | -1.38 | 0.026643 | 0.999844 |
| <i>Dexi</i>     | dexamethasone-induced transcript                                                                             | -1.38 | 0.007421 | 0.999844 |
| <i>Bloc1s6</i>  | biogenesis of lysosomal organelles complex-1, subunit 6, pallidin                                            | -1.38 | 0.043804 | 0.999844 |
| <i>Decr1</i>    | 2,4-dienoyl CoA reductase 1, mitochondrial                                                                   | -1.38 | 0.028173 | 0.999844 |
| <i>Ruvbl2</i>   | RuvB-like protein 2                                                                                          | -1.38 | 0.028123 | 0.999844 |
| <i>Cks1brt</i>  | CDC28 protein kinase 1b, retrogene                                                                           | -1.38 | 0.045983 | 0.999844 |
| <i>Ighmbp2</i>  | immunoglobulin mu binding protein 2                                                                          | -1.38 | 0.014758 | 0.999844 |
| <i>Tuba8</i>    | tubulin, alpha 8                                                                                             | -1.37 | 0.019143 | 0.999844 |
| <i>Vmn1r157</i> | vomeronal 1 receptor 157                                                                                     | -1.37 | 0.017741 | 0.999844 |
| <i>Kdf1</i>     | keratinocyte differentiation factor 1                                                                        | -1.37 | 0.013442 | 0.999844 |
| <i>Olf2r</i>    | olfactory receptor 2                                                                                         | -1.37 | 0.036594 | 0.999844 |
| <i>Acvr2b</i>   | activin receptor IIB                                                                                         | -1.37 | 0.039473 | 0.999844 |
| <i>Pyurf</i>    | Pigy upstream reading frame                                                                                  | -1.36 | 0.018625 | 0.999844 |
| <i>Glp2r</i>    | glucagon-like peptide 2 receptor                                                                             | -1.36 | 0.041276 | 0.999844 |
| <i>Ceacam13</i> | carcinoembryonic antigen-related cell adhesion molecule 13                                                   | -1.36 | 0.033784 | 0.999844 |
| <i>Pus1</i>     | pseudouridine synthase 1                                                                                     | -1.36 | 0.036895 | 0.999844 |
| <i>Itpr12</i>   | inositol 1,4,5-triphosphate receptor interacting protein-like 2                                              | -1.36 | 0.007371 | 0.999844 |
| <i>Osm</i>      | oncostatin M                                                                                                 | -1.36 | 0.027682 | 0.999844 |
| <i>Itga2</i>    | integrin alpha 2                                                                                             | -1.36 | 0.028441 | 0.999844 |
| <i>Smim3</i>    | small integral membrane protein 3                                                                            | -1.36 | 0.01961  | 0.999844 |
| <i>Pcbd1</i>    | pterin 4 alpha carbinolamine dehydratase/dimerization cofactor of hepatocyte nuclear factor 1 alpha (TCF1) 1 | -1.35 | 0.037627 | 0.999844 |
| <i>Efcab8</i>   | EF-hand calcium binding domain 8                                                                             | -1.35 | 0.009387 | 0.999844 |
| <i>Dnajc11</i>  | DnaJ (Hsp40) homolog, subfamily C, member 11                                                                 | -1.35 | 0.037417 | 0.999844 |
| <i>Abhd1</i>    | abhydrolase domain containing 1                                                                              | -1.35 | 0.024943 | 0.999844 |
| <i>Hand2</i>    | heart and neural crest derivatives expressed transcript 2                                                    | -1.35 | 0.028214 | 0.999844 |
| <i>Mybbp1a</i>  | MYB binding protein (P160) 1a                                                                                | -1.35 | 0.017299 | 0.999844 |
| <i>Slc22a27</i> | solute carrier family 22, member 27                                                                          | -1.35 | 0.011636 | 0.999844 |
| <i>Qser1</i>    | glutamine and serine rich 1                                                                                  | -1.34 | 0.00633  | 0.999844 |
| <i>Olf477</i>   | olfactory receptor 477                                                                                       | -1.34 | 0.008934 | 0.999844 |

|                 |                                                                                                                |       |          |          |
|-----------------|----------------------------------------------------------------------------------------------------------------|-------|----------|----------|
| <i>Obox8</i>    | oocyte specific homeobox 8 [Source:MGI Symbol;Acc:MGI:3645855]; PREDICTED: predicted gene 5585 (Gm5585), mRNA. | -1.34 | 0.023151 | 0.999844 |
| <i>Cyp2c67</i>  | cytochrome P450, family 2, subfamily c, polypeptide 67                                                         | -1.34 | 0.003203 | 0.999844 |
| <i>Shisa3</i>   | shisa family member 3                                                                                          | -1.33 | 0.002222 | 0.999844 |
| <i>Cfl2</i>     | cofilin 2, muscle                                                                                              | -1.33 | 0.004671 | 0.999844 |
| <i>H3f3a</i>    | H3 histone, family 3A                                                                                          | -1.33 | 0.010917 | 0.999844 |
| <i>Slc25a25</i> | solute carrier family 25 (mitochondrial carrier, phosphate carrier), member 25                                 | -1.33 | 0.021037 | 0.999844 |
| <i>Mafg</i>     | v-maf musculoaponeurotic fibrosarcoma oncogene family, protein G (avian)                                       | -1.33 | 0.040508 | 0.999844 |
| <i>Vpreb1</i>   | pre-B lymphocyte gene 1                                                                                        | -1.33 | 0.03425  | 0.999844 |
| <i>Gif</i>      | gastric intrinsic factor                                                                                       | -1.33 | 0.020989 | 0.999844 |
| <i>Glipr1</i>   | GLI pathogenesis-related 1 (glioma)                                                                            | -1.32 | 0.031554 | 0.999844 |
| <i>Comp</i>     | cartilage oligomeric matrix protein                                                                            | -1.32 | 0.003803 | 0.999844 |
| <i>Csprs</i>    | component of Sp100-rs                                                                                          | -1.32 | 0.035138 | 0.999844 |
| <i>Olf1084</i>  | olfactory receptor 1084                                                                                        | -1.32 | 0.010107 | 0.999844 |
| <i>Ptgfrn</i>   | prostaglandin F2 receptor negative regulator                                                                   | -1.32 | 0.031622 | 0.999844 |
| <i>Trmo</i>     | tRNA methyltransferase O                                                                                       | -1.32 | 0.044247 | 0.999844 |
| <i>Zfp513</i>   | zinc finger protein 513                                                                                        | -1.31 | 0.034166 | 0.999844 |
| <i>Enpp4</i>    | ectonucleotide pyrophosphatase/phosphodiesterase 4                                                             | -1.31 | 0.021216 | 0.999844 |
| <i>Chit1</i>    | chitinase 1 (chitotriosidase)                                                                                  | -1.31 | 0.016582 | 0.999844 |
| <i>Lrat</i>     | lecithin-retinol acyltransferase (phosphatidylcholine-retinol-O-acyltransferase)                               | -1.31 | 0.000448 | 0.995461 |
| <i>Ifna5</i>    | interferon alpha 5                                                                                             | -1.31 | 0.002671 | 0.999844 |
| <i>Hrc</i>      | histidine rich calcium binding protein                                                                         | -1.31 | 0.03435  | 0.999844 |
| <i>Olf370</i>   | olfactory receptor 370                                                                                         | -1.31 | 0.011846 | 0.999844 |
| <i>Cdt1</i>     | chromatin licensing and DNA replication factor 1                                                               | -1.31 | 0.044095 | 0.999844 |
| <i>Hmg20b</i>   | high mobility group 20B                                                                                        | -1.31 | 0.031518 | 0.999844 |
| <i>Slc47a1</i>  | solute carrier family 47, member 1                                                                             | -1.31 | 0.025704 | 0.999844 |
| <i>Serpinf1</i> | serine (or cysteine) peptidase inhibitor, clade F, member 1                                                    | -1.3  | 0.010836 | 0.999844 |
| <i>Cyp24a1</i>  | cytochrome P450, family 24, subfamily a, polypeptide 1                                                         | -1.3  | 0.025407 | 0.999844 |
| <i>Dnaaf2</i>   | dynein, axonemal assembly factor 2                                                                             | -1.3  | 0.004649 | 0.999844 |
| <i>Scd1</i>     | stearoyl-Coenzyme A desaturase 1                                                                               | -1.3  | 0.048153 | 0.999844 |

|                      |                                                                    |       |          |          |
|----------------------|--------------------------------------------------------------------|-------|----------|----------|
| <i>Olf316</i>        | olfactory receptor 316                                             | -1.29 | 0.007793 | 0.999844 |
| <i>Ptges</i>         | prostaglandin E synthase                                           | -1.29 | 0.031228 | 0.999844 |
| <i>Olfm5</i>         | olfactomedin 5                                                     | -1.29 | 0.014143 | 0.999844 |
| <i>Olf146</i>        | olfactory receptor 146                                             | -1.29 | 0.04396  | 0.999844 |
| <i>Iqcf4</i>         | IQ motif containing F4                                             | -1.29 | 0.03582  | 0.999844 |
| <i>Scn10a</i>        | sodium channel, voltage-gated, type X, alpha                       | -1.29 | 0.018212 | 0.999844 |
| <i>Olf384</i>        | olfactory receptor 384                                             | -1.29 | 0.019689 | 0.999844 |
| <i>Cdca2</i>         | cell division cycle associated 2                                   | -1.29 | 0.038864 | 0.999844 |
| <i>Btnl4</i>         | butyrophilin-like 4                                                | -1.29 | 0.021929 | 0.999844 |
| <i>Olf94</i>         | olfactory receptor 94                                              | -1.29 | 0.004863 | 0.999844 |
| <i>Grhl3</i>         | grainyhead-like 3 (Drosophila)                                     | -1.28 | 0.049572 | 0.999844 |
| <i>Tubal3</i>        | tubulin, alpha-like 3                                              | -1.28 | 0.027154 | 0.999844 |
| <i>Mrpl15</i>        | mitochondrial ribosomal protein L15                                | -1.28 | 0.034866 | 0.999844 |
| <i>B3galt1</i>       | UDP-Gal:betaGlcNAc beta 1,3-galactosyltransferase, polypeptide 1   | -1.28 | 0.03214  | 0.999844 |
| <i>Pzp</i>           | pregnancy zone protein                                             | -1.28 | 0.046005 | 0.999844 |
| <i>Pth1r</i>         | parathyroid hormone 1 receptor                                     | -1.28 | 0.018372 | 0.999844 |
| <i>Pik3r5</i>        | phosphoinositide-3-kinase, regulatory subunit 5, p101              | -1.28 | 0.016022 | 0.999844 |
| <i>Gabra6</i>        | gamma-aminobutyric acid (GABA) A receptor, subunit alpha 6         | -1.28 | 0.017024 | 0.999844 |
| <i>Tmem132c</i>      | transmembrane protein 132C                                         | -1.27 | 0.029298 | 0.999844 |
| <i>Med24</i>         | mediator complex subunit 24                                        | -1.27 | 0.004136 | 0.999844 |
| <i>Nifk</i>          | nucleolar protein interacting with the FHA domain of MKI67         | -1.27 | 0.036439 | 0.999844 |
| <i>Mrgprb1</i>       | MAS-related GPR, member B1                                         | -1.27 | 0.005595 | 0.999844 |
| <i>Pdgfrl</i>        | platelet-derived growth factor receptor-like                       | -1.27 | 0.042603 | 0.999844 |
| <i>Col12a1</i>       | collagen, type XII, alpha 1                                        | -1.27 | 0.016195 | 0.999844 |
| <i>Gsg1l2</i>        | GSG1-like 2                                                        | -1.27 | 0.025398 | 0.999844 |
| <i>Olf329-ps</i>     | olfactory receptor 329, pseudogene; olfactory receptor 330         | -1.27 | 0.022588 | 0.999844 |
| <i>Olf1361</i>       | olfactory receptor 1361                                            | -1.27 | 0.006414 | 0.999844 |
| <i>Ubxn7</i>         | UBX domain protein 7                                               | -1.26 | 0.016859 | 0.999844 |
| <i>Zc3h18</i>        | zinc finger CCCH-type containing 18                                | -1.26 | 0.044256 | 0.999844 |
| <i>Pds5a</i>         | PDS5, regulator of cohesion maintenance, homolog A (S. cerevisiae) | -1.26 | 0.003786 | 0.999844 |
| <i>Gbp11</i>         | guanylate binding protein 11                                       | -1.26 | 0.03175  | 0.999844 |
| <i>Mmp10</i>         | matrix metalloproteinase 10                                        | -1.26 | 0.049015 | 0.999844 |
| <i>9030619P08Rik</i> | lymphocyte antigen 6 complex pseudogene                            | -1.26 | 0.006798 | 0.999844 |
| <i>Cbs</i>           | cystathionine beta-synthase                                        | -1.26 | 0.047488 | 0.999844 |
| <i>Tmem200c</i>      | transmembrane protein 200C                                         | -1.25 | 0.041433 | 0.999844 |
| <i>Olf1380</i>       | olfactory receptor 1380                                            | -1.25 | 0.049677 | 0.999844 |



|                |                                                                                    |       |          |          |
|----------------|------------------------------------------------------------------------------------|-------|----------|----------|
| <i>Trip12</i>  | thyroid hormone receptor interactor 12                                             | -1.25 | 0.039536 | 0.999844 |
| <i>Gmpr2</i>   | guanosine monophosphate reductase 2                                                | -1.25 | 0.02418  | 0.999844 |
| <i>Vwa5b1</i>  | von Willebrand factor A domain containing 5B1                                      | -1.24 | 0.036081 | 0.999844 |
| <i>Myo18b</i>  | myosin XVIIIb                                                                      | -1.24 | 0.007034 | 0.999844 |
| <i>Tirap</i>   | toll-interleukin 1 receptor (TIR) domain-containing adaptor protein                | -1.24 | 0.002399 | 0.999844 |
| <i>Lcn3</i>    | lipocalin 3                                                                        | -1.23 | 0.032477 | 0.999844 |
| <i>Rnaseh1</i> | ribonuclease H1                                                                    | -1.23 | 0.021158 | 0.999844 |
| <i>Tacc1</i>   | transforming, acidic coiled-coil containing protein 1; microRNA 8108               | -1.23 | 0.030874 | 0.999844 |
| <i>Agps</i>    | alkylglycerone phosphate synthase                                                  | -1.23 | 0.031824 | 0.999844 |
| <i>Col15a1</i> | collagen, type XV, alpha 1                                                         | -1.23 | 0.036757 | 0.999844 |
| <i>Kmt2c</i>   | lysine (K)-specific methyltransferase 2C                                           | -1.23 | 0.017278 | 0.999844 |
| <i>Mvp</i>     | major vault protein                                                                | -1.23 | 0.005897 | 0.999844 |
| <i>Bcl2l10</i> | Bcl2-like 10                                                                       | -1.23 | 0.037026 | 0.999844 |
| <i>Rdh19</i>   | retinol dehydrogenase 19                                                           | -1.23 | 0.024039 | 0.999844 |
| <i>Rsad1</i>   | radical S-adenosyl methionine domain containing 1                                  | -1.23 | 0.019983 | 0.999844 |
| <i>Tpsg1</i>   | tryptase gamma 1                                                                   | -1.23 | 0.017517 | 0.999844 |
| <i>Sv2a</i>    | synaptic vesicle glycoprotein 2 a                                                  | -1.22 | 0.02826  | 0.999844 |
| <i>Esp4</i>    | exocrine gland secreted peptide 4                                                  | -1.22 | 0.005611 | 0.999844 |
| <i>Mcidas</i>  | multiciliate differentiation and DNA synthesis associated cell cycle protein       | -1.22 | 0.029102 | 0.999844 |
| <i>Ccnk</i>    | cyclin K                                                                           | -1.22 | 0.030427 | 0.999844 |
| <i>Galnt5</i>  | UDP-N-acetyl-alpha-D-galactosamine:polypeptide N-acetylgalactosaminyltransferase 5 | -1.22 | 0.005501 | 0.999844 |
| <i>Olf1214</i> | olfactory receptor 1214                                                            | -1.22 | 0.02006  | 0.999844 |
| <i>Olf628</i>  | olfactory receptor 628                                                             | -1.22 | 0.022869 | 0.999844 |
| <i>Mia</i>     | melanoma inhibitory activity                                                       | -1.22 | 0.047553 | 0.999844 |
| <i>Nanos3</i>  | nanos homolog 3 (Drosophila)                                                       | -1.22 | 0.004742 | 0.999844 |
| <i>Cnot1</i>   | CCR4-NOT transcription complex, subunit 1                                          | -1.22 | 0.035583 | 0.999844 |
| <i>Uba7</i>    | ubiquitin-like modifier activating enzyme 7                                        | -1.22 | 0.029582 | 0.999844 |
| <i>Olf803</i>  | olfactory receptor 803                                                             | -1.22 | 0.021059 | 0.999844 |
| <i>Mbtd1</i>   | mbt domain containing 1                                                            | -1.22 | 0.039053 | 0.999844 |
| <i>Abt1</i>    | activator of basal transcription 1                                                 | -1.22 | 0.000097 | 0.995461 |
| <i>Sftpd</i>   | surfactant associated protein D                                                    | -1.22 | 0.033396 | 0.999844 |
| <i>Igll1</i>   | immunoglobulin lambda-like polypeptide 1                                           | -1.22 | 0.031025 | 0.999844 |

|                |                                                                                     |       |          |          |
|----------------|-------------------------------------------------------------------------------------|-------|----------|----------|
| <i>Eef1e1</i>  | eukaryotic translation elongation factor 1 epsilon 1                                | -1.21 | 0.013915 | 0.999844 |
| <i>Zfp410</i>  | zinc finger protein 410                                                             | -1.21 | 0.034046 | 0.999844 |
| <i>Pdcd2l</i>  | programmed cell death 2-like                                                        | -1.21 | 0.017428 | 0.999844 |
| <i>C2cd4d</i>  | C2 calcium-dependent domain containing 4D                                           | -1.21 | 0.028997 | 0.999844 |
| <i>Tmem217</i> | transmembrane protein 217                                                           | -1.21 | 0.047044 | 0.999844 |
| <i>Wasf3</i>   | WAS protein family, member 3                                                        | -1.21 | 0.034793 | 0.999844 |
| <i>Dlg4</i>    | discs, large homolog 4 (Drosophila)                                                 | -1.21 | 0.012915 | 0.999844 |
| <i>Bend6</i>   | BEN domain containing 6                                                             | -1.2  | 0.041109 | 0.999844 |
| <i>Nploc4</i>  | nuclear protein localization 4 homolog (S. cerevisiae)                              | -1.2  | 0.001831 | 0.999844 |
| <i>Rln3</i>    | relaxin 3                                                                           | -1.2  | 0.049674 | 0.999844 |
| <i>Rrbp1</i>   | ribosome binding protein 1                                                          | -1.2  | 0.041086 | 0.999844 |
| <i>Sfi1</i>    | Sfi1 homolog, spindle assembly associated (yeast)                                   | -1.2  | 0.01512  | 0.999844 |
| <i>Loxl2</i>   | lysyl oxidase-like 2; microRNA 6950                                                 | -1.2  | 0.012842 | 0.999844 |
| <i>Brd2</i>    | bromodomain containing 2                                                            | -1.2  | 0.045962 | 0.999844 |
| <i>Fzd1</i>    | frizzled homolog 1 (Drosophila)                                                     | -1.19 | 0.01673  | 0.999844 |
| <i>Rimbp2</i>  | RIMS binding protein 2                                                              | -1.19 | 0.002894 | 0.999844 |
| <i>Ghdc</i>    | GH3 domain containing                                                               | -1.19 | 0.048687 | 0.999844 |
| <i>Zgpat</i>   | zinc finger, CCCH-type with G patch domain; Lck interacting transmembrane adaptor 1 | -1.19 | 0.02361  | 0.999844 |
| <i>Muc1</i>    | mucin 1, transmembrane                                                              | -1.19 | 0.025378 | 0.999844 |
| <i>Mos</i>     | Moloney sarcoma oncogene                                                            | -1.19 | 0.03036  | 0.999844 |
| <i>Kmt2e</i>   | lysine (K)-specific methyltransferase 2E                                            | -1.19 | 0.004746 | 0.999844 |
| <i>Cct8l1</i>  | chaperonin containing TCP1, subunit 8 (theta)-like 1                                | -1.19 | 0.032073 | 0.999844 |
| <i>Apoc3</i>   | apolipoprotein C-III                                                                | -1.19 | 0.048538 | 0.999844 |
| <i>Sprr2a2</i> | small proline-rich protein 2A2; small proline-rich protein 2A1                      | -1.18 | 0.011388 | 0.999844 |
| <i>Olf381</i>  | olfactory receptor 381                                                              | -1.18 | 0.003998 | 0.999844 |
| <i>Trh</i>     | thyrotropin releasing hormone                                                       | -1.17 | 0.04254  | 0.999844 |
| <i>Trim44</i>  | tripartite motif-containing 44                                                      | -1.17 | 0.005159 | 0.999844 |
| <i>Cadm4</i>   | cell adhesion molecule 4                                                            | -1.17 | 0.016654 | 0.999844 |
| <i>Slco2a1</i> | solute carrier organic anion transporter family, member 2a1                         | -1.17 | 0.016368 | 0.999844 |
| <i>Fbxl14</i>  | F-box and leucine-rich repeat protein 14                                            | -1.17 | 0.042307 | 0.999844 |
| <i>Socs5</i>   | suppressor of cytokine signaling 5                                                  | -1.17 | 0.032504 | 0.999844 |
| <i>Pofut1</i>  | protein O-fucosyltransferase 1                                                      | -1.17 | 0.027735 | 0.999844 |
| <i>Rnf19b</i>  | ring finger protein 19B                                                             | -1.17 | 0.024144 | 0.999844 |
| <i>H2bfm</i>   | H2B histone family, member M                                                        | -1.17 | 0.038469 | 0.999844 |

|                 |                                                                                                |       |          |          |
|-----------------|------------------------------------------------------------------------------------------------|-------|----------|----------|
| <i>Pou4f3</i>   | POU domain, class 4, transcription factor 3                                                    | -1.17 | 0.03481  | 0.999844 |
| <i>Trp53rkb</i> | transformation related protein 53 regulating kinase B                                          | -1.16 | 0.011879 | 0.999844 |
| <i>Fcna</i>     | ficolin A                                                                                      | -1.16 | 0.043509 | 0.999844 |
| <i>Trp53rka</i> | transformation related protein 53 regulating kinase A                                          | -1.16 | 0.025612 | 0.999844 |
| <i>Banp</i>     | BTG3 associated nuclear protein                                                                | -1.16 | 0.00506  | 0.999844 |
| <i>Bpifc</i>    | BPI fold containing family C                                                                   | -1.15 | 0.045575 | 0.999844 |
| <i>Adamts14</i> | a disintegrin-like and metallopeptidase (reprolysin type) with thrombospondin type 1 motif, 14 | -1.15 | 0.045821 | 0.999844 |
| <i>Nova1</i>    | neuro-oncological ventral antigen 1                                                            | -1.15 | 0.039407 | 0.999844 |
| <i>Dennd1c</i>  | DENN/MADD domain containing 1C                                                                 | -1.15 | 0.032432 | 0.999844 |
| <i>Hist1h4j</i> | histone cluster 1, H4j; histone cluster 1, H4m                                                 | -1.14 | 0.013843 | 0.999844 |
| <i>Olf1331</i>  | olfactory receptor 1331                                                                        | -1.13 | 0.047844 | 0.999844 |
| <i>Rragc</i>    | Ras-related GTP binding C                                                                      | -1.13 | 0.02586  | 0.999844 |
| <i>Olf138</i>   | olfactory receptor 138                                                                         | -1.13 | 0.035203 | 0.999844 |
| <i>Arntl</i>    | aryl hydrocarbon receptor nuclear translocator-like                                            | -1.12 | 0.049096 | 0.999844 |
| <i>Klhl25</i>   | kelch-like 25                                                                                  | -1.12 | 0.046702 | 0.999844 |
| <i>Sync</i>     | syncoilin                                                                                      | -1.1  | 0.041845 | 0.999844 |
| <i>Mkln1</i>    | muskelin 1, intracellular mediator containing kelch motifs                                     | -1.1  | 0.000683 | 0.999844 |
| <i>Gzmn</i>     | granzyme N                                                                                     | -1.09 | 0.039973 | 0.999844 |
| <i>Atp9b</i>    | ATPase, class II, type 9B                                                                      | -1.09 | 0.001135 | 0.999844 |
| <i>Clasp2</i>   | CLIP associating protein 2                                                                     | -1.07 | 0.027809 | 0.999844 |
| <i>Wif1</i>     | Wnt inhibitory factor 1                                                                        | -1.07 | 0.046737 | 0.999844 |

---

**Table S10- Genes upregulated in the Prefrontal cortex of Ala92-Dio2 mice. (p<0.05)**

| <b>Gene Symbol</b> | <b>Description</b>                                                  | <b>Fold Change (linear) (AA Pre Frontal Cx vs. TT Pre Frontal Cx)</b> | <b>ANOVA p-value (AA Pre Frontal Cx vs. TT Pre Frontal Cx)</b> | <b>FDR p-value (AA Pre Frontal Cx vs. TT Pre Frontal Cx)</b> |
|--------------------|---------------------------------------------------------------------|-----------------------------------------------------------------------|----------------------------------------------------------------|--------------------------------------------------------------|
| <i>Qrich2</i>      | glutamine rich 2                                                    | 1.05                                                                  | 0.036258                                                       | 0.999919                                                     |
| <i>Ints4</i>       | integrator complex subunit 4                                        | 1.09                                                                  | 0.043187                                                       | 0.999919                                                     |
| <i>Gopc</i>        | golgi associated PDZ and coiled-coil motif containing               | 1.1                                                                   | 0.032092                                                       | 0.999919                                                     |
| <i>Slc35e1</i>     | solute carrier family 35, member E1                                 | 1.11                                                                  | 0.033845                                                       | 0.999919                                                     |
| <i>Akap11</i>      | A kinase (PRKA) anchor protein 11                                   | 1.11                                                                  | 0.03221                                                        | 0.999919                                                     |
| <i>Eif4enif1</i>   | eukaryotic translation initiation factor 4E nuclear import factor 1 | 1.11                                                                  | 0.025956                                                       | 0.999919                                                     |
| <i>Cnrip1</i>      | cannabinoid receptor interacting protein 1                          | 1.12                                                                  | 0.035063                                                       | 0.999919                                                     |
| <i>Arl6ip4</i>     | ADP-ribosylation factor-like 6 interacting protein 4                | 1.12                                                                  | 0.032078                                                       | 0.999919                                                     |
| <i>Phldb3</i>      | pleckstrin homology-like domain, family B, member 3                 | 1.12                                                                  | 0.035106                                                       | 0.999919                                                     |
| <i>Olfr685</i>     | olfactory receptor 685                                              | 1.12                                                                  | 0.028307                                                       | 0.999919                                                     |
| <i>Azi2</i>        | 5-azacytidine induced gene 2                                        | 1.12                                                                  | 0.011012                                                       | 0.999919                                                     |
| <i>Klhl12</i>      | kelch-like 12                                                       | 1.13                                                                  | 0.018121                                                       | 0.999919                                                     |
| <i>Fam124b</i>     | family with sequence similarity 124, member B                       | 1.13                                                                  | 0.006116                                                       | 0.999919                                                     |
| <i>Rnaseh1</i>     | ribonuclease H1                                                     | 1.13                                                                  | 0.000815                                                       | 0.999919                                                     |
| <i>Olfr157</i>     | olfactory receptor 157                                              | 1.14                                                                  | 0.028393                                                       | 0.999919                                                     |
| <i>Neil1</i>       | nei endonuclease VIII-like 1 (E. coli)                              | 1.14                                                                  | 0.028976                                                       | 0.999919                                                     |
| <i>Slc20a2</i>     | solute carrier family 20, member 2                                  | 1.15                                                                  | 0.035117                                                       | 0.999919                                                     |
| <i>Rnf208</i>      | ring finger protein 208                                             | 1.15                                                                  | 0.017508                                                       | 0.999919                                                     |
| <i>Pomt2</i>       | protein-O-mannosyltransferase 2                                     | 1.15                                                                  | 0.008739                                                       | 0.999919                                                     |
| <i>Wnt10b</i>      | wingless-type MMTV integration site family, member 10B              | 1.15                                                                  | 0.019262                                                       | 0.999919                                                     |
| <i>Usp2</i>        | ubiquitin specific peptidase 2                                      | 1.15                                                                  | 0.046235                                                       | 0.999919                                                     |
| <i>Fate1</i>       | fetal and adult testis expressed 1                                  | 1.15                                                                  | 0.005162                                                       | 0.999919                                                     |
| <i>Xpnpep1</i>     | X-prolyl aminopeptidase (aminopeptidase P) 1, soluble               | 1.15                                                                  | 0.014863                                                       | 0.999919                                                     |
| <i>Gab1</i>        | growth factor receptor bound protein 2-associated protein 1         | 1.16                                                                  | 0.026638                                                       | 0.999919                                                     |
| <i>Rpa2</i>        | replication protein A2                                              | 1.16                                                                  | 0.035817                                                       | 0.999919                                                     |
| <i>Brox</i>        | BRO1 domain and CAAX motif containing                               | 1.16                                                                  | 0.00008                                                        | 0.590269                                                     |

|                 |                                                                       |      |          |          |
|-----------------|-----------------------------------------------------------------------|------|----------|----------|
| <i>Tmem54</i>   | transmembrane protein 54                                              | 1.16 | 0.028738 | 0.999919 |
| <i>Bcam</i>     | basal cell adhesion molecule                                          | 1.16 | 0.031029 | 0.999919 |
| <i>Nol6</i>     | nucleolar protein family 6 (RNA-associated)                           | 1.16 | 0.044882 | 0.999919 |
| <i>Lrrc39</i>   | leucine rich repeat containing 39                                     | 1.16 | 0.00697  | 0.999919 |
| <i>Abca14</i>   | ATP-binding cassette, sub-family A (ABC1), member 14                  | 1.16 | 0.019026 | 0.999919 |
| <i>Abca7</i>    | ATP-binding cassette, sub-family A (ABC1), member 7                   | 1.16 | 0.046221 | 0.999919 |
| <i>Zc3h10</i>   | zinc finger CCCH type containing 10                                   | 1.16 | 0.049761 | 0.999919 |
| <i>Kif19a</i>   | kinesin family member 19A                                             | 1.16 | 0.017745 | 0.999919 |
| <i>Ccdc85b</i>  | coiled-coil domain containing 85B                                     | 1.17 | 0.000357 | 0.999919 |
| <i>Eya3</i>     | eyes absent 3 homolog (Drosophila)                                    | 1.17 | 0.033559 | 0.999919 |
| <i>Zscan20</i>  | zinc finger and SCAN domains 20                                       | 1.17 | 0.028338 | 0.999919 |
| <i>Tgfa</i>     | transforming growth factor alpha                                      | 1.17 | 0.002415 | 0.999919 |
| <i>Oraov1</i>   | oral cancer overexpressed 1                                           | 1.17 | 0.040289 | 0.999919 |
| <i>Frs2</i>     | fibroblast growth factor receptor substrate 2                         | 1.17 | 0.03536  | 0.999919 |
| <i>Ccng1</i>    | cyclin G1                                                             | 1.17 | 0.038428 | 0.999919 |
| <i>Vmn2r104</i> | vomer nasal 2, receptor 104                                           | 1.17 | 0.030448 | 0.999919 |
| <i>Tmem120b</i> | transmembrane protein 120B                                            | 1.18 | 0.036101 | 0.999919 |
| <i>Pkd1</i>     | polycystic kidney disease 1 homolog                                   | 1.18 | 0.038089 | 0.999919 |
| <i>Hectd3</i>   | HECT domain containing 3                                              | 1.18 | 0.026231 | 0.999919 |
| <i>Cyp26a1</i>  | cytochrome P450, family 26, subfamily a, polypeptide 1                | 1.18 | 0.028574 | 0.999919 |
| <i>Zrsr2</i>    | zinc finger (CCCH type), RNA binding motif and serine/arginine rich 2 | 1.18 | 0.016564 | 0.999919 |
| <i>Man1a2</i>   | mannosidase, alpha, class 1A, member 2                                | 1.18 | 0.020524 | 0.999919 |
| <i>Susd4</i>    | sushi domain containing 4                                             | 1.18 | 0.040942 | 0.999919 |
| <i>Stfa2l1</i>  | stefin A2 like 1                                                      | 1.19 | 0.03119  | 0.999919 |
| <i>Tph1</i>     | tryptophan hydroxylase 1                                              | 1.19 | 0.007698 | 0.999919 |
| <i>Trank1</i>   | tetratricopeptide repeat and ankyrin repeat containing 1              | 1.19 | 0.021434 | 0.999919 |
| <i>Speer1</i>   | spermatogenesis associated glutamate (E)-rich protein 1               | 1.19 | 0.026647 | 0.999919 |
| <i>Ccdc97</i>   | coiled-coil domain containing 97                                      | 1.19 | 0.026595 | 0.999919 |
| <i>Ppm1h</i>    | protein phosphatase 1H (PP2C domain containing); microRNA 8104        | 1.19 | 0.045071 | 0.999919 |
| <i>Myrf1</i>    | myelin regulatory factor-like                                         | 1.19 | 0.025901 | 0.999919 |
| <i>Bicd2</i>    | bicaudal D homolog 2 (Drosophila)                                     | 1.19 | 0.014056 | 0.999919 |

|                 |                                                                                    |      |          |          |
|-----------------|------------------------------------------------------------------------------------|------|----------|----------|
| <i>Apex1</i>    | apurinic/aprimidinic endonuclease 1                                                | 1.2  | 0.020134 | 0.999919 |
| <i>Rasgrp1</i>  | RAS guanyl releasing protein 1                                                     | 1.2  | 0.039882 | 0.999919 |
| <i>F5</i>       | coagulation factor V                                                               | 1.2  | 0.03169  | 0.999919 |
| <i>Klk1b3</i>   | kallikrein 1-related peptidase b3                                                  | 1.2  | 0.044929 | 0.999919 |
| <i>Vasp</i>     | vasodilator-stimulated phosphoprotein                                              | 1.2  | 0.040735 | 0.999919 |
| <i>Nfkbib</i>   | nuclear factor of kappa light polypeptide gene enhancer in B cells inhibitor, beta | 1.2  | 0.044882 | 0.999919 |
| <i>Tmem126a</i> | transmembrane protein 126A                                                         | 1.2  | 0.038492 | 0.999919 |
| <i>Arhgap9</i>  | Rho GTPase activating protein 9                                                    | 1.2  | 0.034365 | 0.999919 |
| <i>Nme4</i>     | NME/NM23 nucleoside diphosphate kinase 4                                           | 1.2  | 0.04467  | 0.999919 |
| <i>Cdc23</i>    | CDC23 cell division cycle 23                                                       | 1.2  | 0.018389 | 0.999919 |
| <i>Sfxn2</i>    | sideroflexin 2                                                                     | 1.2  | 0.025069 | 0.999919 |
| <i>Phykpl</i>   | 5-phosphohydroxy-L-lysine phospholyase                                             | 1.21 | 0.036005 | 0.999919 |
| <i>Trim28</i>   | tripartite motif-containing 28                                                     | 1.21 | 0.047326 | 0.999919 |
| <i>Cldnd2</i>   | claudin domain containing 2                                                        | 1.21 | 0.027002 | 0.999919 |
| <i>Olfr954</i>  | olfactory receptor 954                                                             | 1.21 | 0.035149 | 0.999919 |
| <i>Olfr1373</i> | olfactory receptor 1373                                                            | 1.21 | 0.024844 | 0.999919 |
| <i>Parn</i>     | poly(A)-specific ribonuclease (deadenylation nuclease)                             | 1.21 | 0.022562 | 0.999919 |
| <i>Tmem30c</i>  | transmembrane protein 30C                                                          | 1.21 | 0.018886 | 0.999919 |
| <i>Pcnxl3</i>   | pecanex-like 3 (Drosophila)                                                        | 1.21 | 0.04869  | 0.999919 |
| <i>Mpp7</i>     | membrane protein, palmitoylated 7 (MAGUK p55 subfamily member 7)                   | 1.22 | 0.030842 | 0.999919 |
| <i>Tmem55b</i>  | transmembrane protein 55b                                                          | 1.22 | 0.03223  | 0.999919 |
| <i>Ctsm</i>     | cathepsin M                                                                        | 1.22 | 0.018122 | 0.999919 |
| <i>Mob1b</i>    | MOB kinase activator 1B                                                            | 1.22 | 0.041421 | 0.999919 |
| <i>Slc26a1</i>  | solute carrier family 26 (sulfate transporter), member 1                           | 1.22 | 0.029186 | 0.999919 |
| <i>Klk1b27</i>  | kallikrein 1-related peptidase b27                                                 | 1.22 | 0.023588 | 0.999919 |
| <i>Cmc1</i>     | COX assembly mitochondrial protein 1                                               | 1.22 | 0.041437 | 0.999919 |
| <i>Gfm2</i>     | G elongation factor, mitochondrial 2                                               | 1.22 | 0.037157 | 0.999919 |
| <i>Cyp2d26</i>  | cytochrome P450, family 2, subfamily d, polypeptide 26                             | 1.22 | 0.010153 | 0.999919 |
| <i>Hnrnp2</i>   | heterogeneous nuclear ribonucleoprotein H2                                         | 1.23 | 0.048228 | 0.999919 |
| <i>Stx12</i>    | syntaxin 12                                                                        | 1.23 | 0.010606 | 0.999919 |
| <i>Vmn2r55</i>  | vomer nasal 2, receptor 55                                                         | 1.23 | 0.043331 | 0.999919 |

|                |                                                                                                           |      |          |          |
|----------------|-----------------------------------------------------------------------------------------------------------|------|----------|----------|
| <i>Card9</i>   | caspase recruitment domain family, member 9                                                               | 1.23 | 0.007548 | 0.999919 |
| <i>Map2k5</i>  | mitogen-activated protein kinase kinase 5                                                                 | 1.23 | 0.023238 | 0.999919 |
| <i>Tlcd2</i>   | TLC domain containing 2                                                                                   | 1.23 | 0.042706 | 0.999919 |
| <i>Pde6a</i>   | phosphodiesterase 6A, cGMP-specific, rod, alpha                                                           | 1.23 | 0.031397 | 0.999919 |
| <i>Gbas</i>    | glioblastoma amplified sequence                                                                           | 1.24 | 0.011574 | 0.999919 |
| <i>Zfp518a</i> | zinc finger protein 518A; microRNA 8092                                                                   | 1.24 | 0.041092 | 0.999919 |
| <i>Pdgfrr1</i> | platelet-derived growth factor receptor-like                                                              | 1.24 | 0.035098 | 0.999919 |
| <i>Inf2</i>    | inverted formin, FH2 and WH2 domain containing                                                            | 1.24 | 0.035395 | 0.999919 |
| <i>Lhx2</i>    | LIM homeobox protein 2                                                                                    | 1.24 | 0.026707 | 0.999919 |
| <i>Slc11a1</i> | solute carrier family 11 (proton-coupled divalent metal ion transporters), member 1                       | 1.24 | 0.042927 | 0.999919 |
| <i>Vmn2r8</i>  | vomer nasal 2, receptor 8                                                                                 | 1.24 | 0.010722 | 0.999919 |
| <i>Bnc1</i>    | basonuclin 1                                                                                              | 1.24 | 0.029486 | 0.999919 |
| <i>Itipr12</i> | inositol 1,4,5-triphosphate receptor interacting protein-like 2                                           | 1.24 | 0.017257 | 0.999919 |
| <i>Cyp2c40</i> | cytochrome P450, family 2, subfamily c, polypeptide 40                                                    | 1.24 | 0.003765 | 0.999919 |
| <i>Mpo</i>     | myeloperoxidase                                                                                           | 1.25 | 0.009087 | 0.999919 |
| <i>Celf4</i>   | CUGBP, Elav-like family member 4                                                                          | 1.25 | 0.043548 | 0.999919 |
| <i>Zzz3</i>    | zinc finger, ZZ domain containing 3                                                                       | 1.25 | 0.013591 | 0.999919 |
| <i>Lamb1</i>   | laminin B1                                                                                                | 1.26 | 0.03796  | 0.999919 |
| <i>Zfp335</i>  | zinc finger protein 335                                                                                   | 1.26 | 0.000482 | 0.999919 |
| <i>Ano10</i>   | anoctamin 10                                                                                              | 1.26 | 0.046089 | 0.999919 |
| <i>Grm5</i>    | glutamate receptor, metabotropic 5                                                                        | 1.26 | 0.006572 | 0.999919 |
| <i>Prpf18</i>  | PRP18 pre-mRNA processing factor 18 homolog (yeast)                                                       | 1.26 | 0.037141 | 0.999919 |
| <i>Enpep</i>   | glutamyl aminopeptidase                                                                                   | 1.26 | 0.015115 | 0.999919 |
| <i>Golga7</i>  | golgi autoantigen, golgin subfamily a, 7                                                                  | 1.26 | 0.039474 | 0.999919 |
| <i>Zfp810</i>  | zinc finger protein 810                                                                                   | 1.26 | 0.049622 | 0.999919 |
| <i>Brf1</i>    | BRF1 homolog, subunit of RNA polymerase III transcription initiation factor IIIB ( <i>S. cerevisiae</i> ) | 1.26 | 0.047963 | 0.999919 |
| <i>Krt73</i>   | keratin 73                                                                                                | 1.26 | 0.02117  | 0.999919 |
| <i>Heatr5b</i> | HEAT repeat containing 5B                                                                                 | 1.26 | 0.039809 | 0.999919 |
| <i>Tmco6</i>   | transmembrane and coiled-coil domains 6                                                                   | 1.26 | 0.017258 | 0.999919 |

|                 |                                                                                                                 |      |          |          |
|-----------------|-----------------------------------------------------------------------------------------------------------------|------|----------|----------|
| <i>Cfap44</i>   | cilia and flagella associated protein 44                                                                        | 1.27 | 0.015362 | 0.999919 |
| <i>Tusc2</i>    | tumor suppressor candidate 2                                                                                    | 1.27 | 0.009143 | 0.999919 |
| <i>Rab14</i>    | RAB14, member RAS oncogene family                                                                               | 1.27 | 0.040837 | 0.999919 |
| <i>Rad52</i>    | RAD52 homolog ( <i>S. cerevisiae</i> )                                                                          | 1.27 | 0.039885 | 0.999919 |
| <i>Cts8</i>     | cathepsin 8                                                                                                     | 1.27 | 0.003361 | 0.999919 |
| <i>Mgrn1</i>    | mahogunin, ring finger 1                                                                                        | 1.27 | 0.019745 | 0.999919 |
| <i>Sgms1</i>    | sphingomyelin synthase 1                                                                                        | 1.28 | 0.045031 | 0.999919 |
| <i>Pdc</i>      | phosducin                                                                                                       | 1.28 | 0.041241 | 0.999919 |
| <i>Tmed11</i>   | transmembrane emp24 protein transport domain containing                                                         | 1.28 | 0.039152 | 0.999919 |
| <i>Ceacam19</i> | carcinoembryonic antigen-related cell adhesion molecule 19                                                      | 1.28 | 0.037189 | 0.999919 |
| <i>Gpr20</i>    | G protein-coupled receptor 20                                                                                   | 1.28 | 0.034401 | 0.999919 |
| <i>Olf127</i>   | olfactory receptor 127                                                                                          | 1.28 | 0.048254 | 0.999919 |
| <i>Cenpf</i>    | centromere protein F                                                                                            | 1.29 | 0.019963 | 0.999919 |
| <i>Cdnf</i>     | cerebral dopamine neurotrophic factor                                                                           | 1.29 | 0.030356 | 0.999919 |
| <i>Nup210l</i>  | nucleoporin 210-like                                                                                            | 1.29 | 0.031837 | 0.999919 |
| <i>Clec2g</i>   | C-type lectin domain family 2, member g                                                                         | 1.29 | 0.037615 | 0.999919 |
| <i>Tmie</i>     | transmembrane inner ear solute carrier family 7 (cationic amino acid transporter, $\gamma^+$ system), member 15 | 1.29 | 0.017933 | 0.999919 |
| <i>Slc7a15</i>  |                                                                                                                 | 1.29 | 0.017933 | 0.999919 |
| <i>Hnrnpa0</i>  | heterogeneous nuclear ribonucleoprotein A0                                                                      | 1.29 | 0.049928 | 0.999919 |
| <i>Oit1</i>     | oncoprotein induced transcript 1                                                                                | 1.29 | 0.022266 | 0.999919 |
| <i>Olf94</i>    | olfactory receptor 94                                                                                           | 1.29 | 0.036559 | 0.999919 |
| <i>C2</i>       | complement component 2 (within H-2S)                                                                            | 1.29 | 0.034    | 0.999919 |
| <i>Cox10</i>    | cytochrome c oxidase assembly protein 10                                                                        | 1.3  | 0.009849 | 0.999919 |
| <i>E2f3</i>     | E2F transcription factor 3                                                                                      | 1.3  | 0.032545 | 0.999919 |
| <i>Actrt3</i>   | actin related protein T3                                                                                        | 1.3  | 0.028702 | 0.999919 |
| <i>Dmp1</i>     | dentin matrix protein 1                                                                                         | 1.3  | 0.005155 | 0.999919 |
| <i>Zar1</i>     | zygote arrest 1                                                                                                 | 1.3  | 0.041494 | 0.999919 |
| <i>Ubqlnl</i>   | ubiquilin-like                                                                                                  | 1.3  | 0.010854 | 0.999919 |
| <i>Nbas</i>     | neuroblastoma amplified sequence                                                                                | 1.3  | 0.001823 | 0.999919 |
| <i>Zfp957</i>   | zinc finger protein 957                                                                                         | 1.3  | 0.01576  | 0.999919 |
| <i>Kank1</i>    | KN motif and ankyrin repeat domains 1                                                                           | 1.3  | 0.045724 | 0.999919 |
| <i>Mab21l2</i>  | mab-21-like 2 ( <i>C. elegans</i> )                                                                             | 1.31 | 0.041286 | 0.999919 |
| <i>Nphp3</i>    | nephronophthisis 3 (adolescent)                                                                                 | 1.31 | 0.043919 | 0.999919 |



|                 |                                                                                                                                |      |          |          |
|-----------------|--------------------------------------------------------------------------------------------------------------------------------|------|----------|----------|
| <i>Bend4</i>    | BEN domain containing 4                                                                                                        | 1.31 | 0.031731 | 0.999919 |
| <i>Gpr155</i>   | G protein-coupled receptor 155                                                                                                 | 1.31 | 0.032781 | 0.999919 |
| <i>Apom</i>     | apolipoprotein M                                                                                                               | 1.31 | 0.010698 | 0.999919 |
| <i>Usp24</i>    | ubiquitin specific peptidase 24                                                                                                | 1.32 | 0.034964 | 0.999919 |
| <i>Malsu1</i>   | mitochondrial assembly of ribosomal large subunit 1                                                                            | 1.32 | 0.012366 | 0.999919 |
| <i>Tgfbr2</i>   | transforming growth factor, beta receptor II                                                                                   | 1.32 | 0.028272 | 0.999919 |
| <i>Cypt9</i>    | cysteine-rich perinuclear theca 9;<br>cysteine-rich perinuclear theca 10;<br>cysteine-rich perinuclear theca 4                 | 1.32 | 0.036417 | 0.999919 |
| <i>Mrgpra2a</i> | MAS-related GPR, member A2A                                                                                                    | 1.32 | 0.029146 | 0.999919 |
| <i>Haus7</i>    | HAUS augmin-like complex, subunit 7                                                                                            | 1.32 | 0.035775 | 0.999919 |
| <i>Amhr2</i>    | anti-Mullerian hormone type 2 receptor                                                                                         | 1.32 | 0.032217 | 0.999919 |
| <i>Rcor3</i>    | REST corepressor 3                                                                                                             | 1.33 | 0.014869 | 0.999919 |
| <i>Slx4ip</i>   | SLX4 interacting protein                                                                                                       | 1.33 | 0.036707 | 0.999919 |
| <i>Acta1</i>    | actin, alpha 1, skeletal muscle                                                                                                | 1.33 | 0.021467 | 0.999919 |
| <i>Tnip2</i>    | TNFAIP3 interacting protein 2                                                                                                  | 1.33 | 0.032846 | 0.999919 |
| <i>Mogat1</i>   | monoacylglycerol O-acyltransferase 1                                                                                           | 1.33 | 0.048471 | 0.999919 |
| <i>Rab3ip</i>   | RAB3A interacting protein                                                                                                      | 1.33 | 0.035702 | 0.999919 |
| <i>Acot12</i>   | acyl-CoA thioesterase 12                                                                                                       | 1.33 | 0.00877  | 0.999919 |
| <i>Golgb1</i>   | golgi autoantigen, golgin subfamily b,<br>macrogolgin 1                                                                        | 1.33 | 0.009266 | 0.999919 |
| <i>Palm3</i>    | paralemmin 3                                                                                                                   | 1.34 | 0.000806 | 0.999919 |
| <i>Adar</i>     | adenosine deaminase, RNA-specific                                                                                              | 1.34 | 0.039349 | 0.999919 |
| <i>Il20ra</i>   | interleukin 20 receptor, alpha                                                                                                 | 1.34 | 0.039246 | 0.999919 |
| <i>Ptpn11</i>   | protein tyrosine phosphatase, non-receptor type 11                                                                             | 1.34 | 0.001282 | 0.999919 |
| <i>Mnt</i>      | max binding protein                                                                                                            | 1.34 | 0.038516 | 0.999919 |
| <i>Btbd17</i>   | BTB (POZ) domain containing 17                                                                                                 | 1.34 | 0.048346 | 0.999919 |
| <i>Tex19.2</i>  | testis expressed gene 19.2                                                                                                     | 1.34 | 0.022195 | 0.999919 |
| <i>Csf2rb2</i>  | colony stimulating factor 2 receptor,<br>beta 2, low-affinity (granulocyte-macrophage);<br>microRNA 7676-1;<br>microRNA 7676-2 | 1.34 | 0.011011 | 0.999919 |
| <i>Ahsp</i>     | alpha hemoglobin stabilizing protein                                                                                           | 1.34 | 0.011702 | 0.999919 |
| <i>Ptchd2</i>   | patched domain containing 2                                                                                                    | 1.35 | 0.021881 | 0.999919 |
| <i>St6gal2</i>  | beta galactoside alpha 2,6 sialyltransferase 2                                                                                 | 1.35 | 0.049003 | 0.999919 |

|                 |                                                                                             |      |          |          |
|-----------------|---------------------------------------------------------------------------------------------|------|----------|----------|
| <i>Nfxl1</i>    | nuclear transcription factor, X-box binding-like 1                                          | 1.35 | 0.00218  | 0.999919 |
| <i>Muc3</i>     | mucin 3, intestinal                                                                         | 1.35 | 0.002787 | 0.999919 |
| <i>Rpain</i>    | RPA interacting protein                                                                     | 1.35 | 0.015844 | 0.999919 |
| <i>Mfsd2b</i>   | major facilitator superfamily domain containing 2B                                          | 1.35 | 0.035591 | 0.999919 |
| <i>Colq</i>     | collagen-like tail subunit (single strand of homotrimer) of asymmetric acetylcholinesterase | 1.35 | 0.002323 | 0.999919 |
| <i>Fam199x</i>  | family with sequence similarity 199, X-linked                                               | 1.36 | 0.007672 | 0.999919 |
| <i>Oaz2</i>     | ornithine decarboxylase antizyme 2                                                          | 1.36 | 0.017047 | 0.999919 |
| <i>Necab1</i>   | N-terminal EF-hand calcium binding protein 1                                                | 1.36 | 0.027609 | 0.999919 |
| <i>Olfr365</i>  | olfactory receptor 365                                                                      | 1.36 | 0.030454 | 0.999919 |
| <i>Btd8</i>     | BTB (POZ) domain containing 8                                                               | 1.36 | 0.043027 | 0.999919 |
| <i>Vmn1r179</i> | vomer nasal 1 receptor 179                                                                  | 1.36 | 0.02723  | 0.999919 |
| <i>Dpf3</i>     | D4, zinc and double PHD fingers, family 3                                                   | 1.37 | 0.035433 | 0.999919 |
| <i>Lrrc47</i>   | leucine rich repeat containing 47                                                           | 1.37 | 0.031388 | 0.999919 |
| <i>Sympk</i>    | symplekin                                                                                   | 1.37 | 0.013335 | 0.999919 |
| <i>Ifnl3</i>    | interferon lambda 3                                                                         | 1.37 | 0.01624  | 0.999919 |
| <i>Tbc1d22a</i> | TBC1 domain family, member 22a                                                              | 1.37 | 0.049862 | 0.999919 |
| <i>Kif20a</i>   | kinesin family member 20A                                                                   | 1.37 | 0.018008 | 0.999919 |
| <i>Gstt2</i>    | glutathione S-transferase, theta 2                                                          | 1.38 | 0.032897 | 0.999919 |
| <i>Mapk14</i>   | mitogen-activated protein kinase 14                                                         | 1.38 | 0.01803  | 0.999919 |
| <i>Pign</i>     | phosphatidylinositol glycan anchor biosynthesis, class N                                    | 1.38 | 0.047697 | 0.999919 |
| <i>Olfr338</i>  | olfactory receptor 338                                                                      | 1.38 | 0.045082 | 0.999919 |
| <i>Wipf1</i>    | WAS/WASL interacting protein family, member 1                                               | 1.38 | 0.048832 | 0.999919 |
| <i>She</i>      | src homology 2 domain-containing transforming protein E                                     | 1.38 | 0.022075 | 0.999919 |
| <i>Spats1</i>   | spermatogenesis associated, serine-rich 1                                                   | 1.38 | 0.047041 | 0.999919 |
| <i>Grwd1</i>    | glutamate-rich WD repeat containing 1                                                       | 1.39 | 0.037593 | 0.999919 |
| <i>Gpr61</i>    | G protein-coupled receptor 61                                                               | 1.39 | 0.026972 | 0.999919 |
| <i>Chtop</i>    | chromatin target of PRMT1                                                                   | 1.39 | 0.021859 | 0.999919 |
| <i>Olfr62</i>   | olfactory receptor 62                                                                       | 1.39 | 0.026167 | 0.999919 |
| <i>Cml3</i>     | camello-like 3                                                                              | 1.39 | 0.037477 | 0.999919 |
| <i>Dgke</i>     | diacylglycerol kinase, epsilon                                                              | 1.39 | 0.04233  | 0.999919 |
| <i>Ccdc54</i>   | coiled-coil domain containing 54                                                            | 1.39 | 0.032633 | 0.999919 |
| <i>Emb</i>      | embigin                                                                                     | 1.4  | 0.026508 | 0.999919 |

|                 |                                                                                      |      |          |          |
|-----------------|--------------------------------------------------------------------------------------|------|----------|----------|
| <i>Trip11</i>   | thyroid hormone receptor interactor 11                                               | 1.4  | 0.031554 | 0.999919 |
| <i>Atr</i>      | ataxia telangiectasia and Rad3 related                                               | 1.4  | 0.021491 | 0.999919 |
| <i>Dhrs3</i>    | dehydrogenase/reductase (SDR family) member 3                                        | 1.4  | 0.046851 | 0.999919 |
| <i>Polr3e</i>   | polymerase (RNA) III (DNA directed) polypeptide E                                    | 1.4  | 0.039648 | 0.999919 |
| <i>Als2cl</i>   | ALS2 C-terminal like                                                                 | 1.4  | 0.012195 | 0.999919 |
| <i>Slc22a23</i> | solute carrier family 22, member 23                                                  | 1.4  | 0.043388 | 0.999919 |
| <i>Ubr2</i>     | ubiquitin protein ligase E3 component n-recognin 2                                   | 1.4  | 0.042483 | 0.999919 |
| <i>Dmrtb1</i>   | DMRT-like family B with proline-rich C-terminal, 1                                   | 1.41 | 0.029237 | 0.999919 |
| <i>Speer4b</i>  | spermatogenesis associated glutamate (E)-rich protein 4B                             | 1.41 | 0.04072  | 0.999919 |
| <i>Olfr613</i>  | olfactory receptor 613                                                               | 1.41 | 0.039928 | 0.999919 |
| <i>Atm</i>      | ataxia telangiectasia mutated                                                        | 1.41 | 0.010182 | 0.999919 |
| <i>Batf</i>     | basic leucine zipper transcription factor, ATF-like                                  | 1.41 | 0.008218 | 0.999919 |
| <i>F2r</i>      | coagulation factor II (thrombin) receptor                                            | 1.41 | 0.02229  | 0.999919 |
| <i>Zfp7</i>     | zinc finger protein 7                                                                | 1.41 | 0.045228 | 0.999919 |
| <i>Vti1a</i>    | vesicle transport through interaction with t-SNAREs 1A                               | 1.41 | 0.030904 | 0.999919 |
| <i>Tfap2a</i>   | transcription factor AP-2, alpha                                                     | 1.42 | 0.019274 | 0.999919 |
| <i>Cog5</i>     | component of oligomeric golgi complex 5                                              | 1.42 | 0.032708 | 0.999919 |
| <i>Dcdc2c</i>   | doublecortin domain containing 2C                                                    | 1.42 | 0.045174 | 0.999919 |
| <i>Bmp3</i>     | bone morphogenetic protein 3                                                         | 1.42 | 0.001506 | 0.999919 |
| <i>Flg2</i>     | filaggrin family member 2                                                            | 1.42 | 0.000809 | 0.999919 |
| <i>Tceanc2</i>  | transcription elongation factor A (SII) N-terminal and central domain containing 2   | 1.42 | 0.025349 | 0.999919 |
| <i>Ppcdc</i>    | phosphopantothenoylecysteine decarboxylase                                           | 1.42 | 0.015994 | 0.999919 |
| <i>Lrrc17</i>   | leucine rich repeat containing 17                                                    | 1.43 | 0.021949 | 0.999919 |
| <i>Zfp853</i>   | zinc finger protein 853 [Source:MGI Symbol;Acc:MGI:2685638]; zinc finger protein 853 | 1.43 | 0.003699 | 0.999919 |
| <i>Polr1a</i>   | polymerase (RNA) I polypeptide A                                                     | 1.43 | 0.029169 | 0.999919 |
| <i>Otop3</i>    | otopetrin 3                                                                          | 1.43 | 0.020851 | 0.999919 |
| <i>Olfr1260</i> | olfactory receptor 1260                                                              | 1.44 | 0.00622  | 0.999919 |

|                 |                                                                                           |      |          |          |
|-----------------|-------------------------------------------------------------------------------------------|------|----------|----------|
| <i>Olfr1196</i> | olfactory receptor 1196                                                                   | 1.44 | 0.04424  | 0.999919 |
| <i>Atg4a</i>    | autophagy related 4A, cysteine peptidase; autophagy related 4A, pseudogene                | 1.44 | 0.044373 | 0.999919 |
| <i>Mutyh</i>    | mutY homolog (E. coli)                                                                    | 1.44 | 0.021462 | 0.999919 |
| <i>Cnbd1</i>    | cyclic nucleotide binding domain containing 1                                             | 1.44 | 0.037592 | 0.999919 |
| <i>Usp17ld</i>  | ubiquitin specific peptidase 17-like D                                                    | 1.44 | 0.034287 | 0.999919 |
| <i>Trappc10</i> | trafficking protein particle complex 10                                                   | 1.44 | 0.035959 | 0.999919 |
| <i>Ska1</i>     | spindle and kinetochore associated complex subunit 1                                      | 1.44 | 0.018759 | 0.999919 |
| <i>Henmt1</i>   | HEN1 methyltransferase homolog 1 (Arabidopsis)                                            | 1.45 | 0.005281 | 0.999919 |
| <i>Saxo2</i>    | stablizer of axonemal microtubules 2                                                      | 1.45 | 0.004535 | 0.999919 |
| <i>Olfr584</i>  | olfactory receptor 584                                                                    | 1.45 | 0.034696 | 0.999919 |
| <i>Atl3</i>     | atlastin GTPase 3                                                                         | 1.46 | 0.041697 | 0.999919 |
| <i>Olfr891</i>  | olfactory receptor 891                                                                    | 1.46 | 0.032817 | 0.999919 |
| <i>Egln3</i>    | EGL nine homolog 3 (C. elegans), mRNA (cDNA clone MGC:36685 IMAGE:5371854), complete cds. | 1.46 | 0.04986  | 0.999919 |
| <i>Ifnk</i>     | interferon kappa                                                                          | 1.46 | 0.002459 | 0.999919 |
| <i>Nsun4</i>    | NOL1/NOP2/Sun domain family, member 4                                                     | 1.47 | 0.001837 | 0.999919 |
| <i>Megf11</i>   | multiple EGF-like-domains 11                                                              | 1.48 | 0.002394 | 0.999919 |
| <i>Olfr552</i>  | olfactory receptor 552                                                                    | 1.48 | 0.01532  | 0.999919 |
| <i>Olfr1178</i> | olfactory receptor 1178                                                                   | 1.49 | 0.014406 | 0.999919 |
| <i>Stfa3</i>    | stefin A3                                                                                 | 1.5  | 0.003004 | 0.999919 |
| <i>Robo4</i>    | roundabout homolog 4 (Drosophila)                                                         | 1.5  | 0.027851 | 0.999919 |
| <i>Olfr924</i>  | olfactory receptor 924                                                                    | 1.5  | 0.037599 | 0.999919 |
| <i>Zfp354a</i>  | zinc finger protein 354A                                                                  | 1.5  | 0.003202 | 0.999919 |
| <i>Zswim8</i>   | zinc finger SWIM-type containing 8                                                        | 1.5  | 0.030568 | 0.999919 |
| <i>Apol7c</i>   | apolipoprotein L 7c                                                                       | 1.5  | 0.015245 | 0.999919 |
| <i>Shc4</i>     | SHC (Src homology 2 domain containing) family, member 4                                   | 1.51 | 0.007148 | 0.999919 |
| <i>Cyp4f13</i>  | cytochrome P450, family 4, subfamily f, polypeptide 13                                    | 1.51 | 0.021976 | 0.999919 |
| <i>Zbed4</i>    | zinc finger, BED type containing 4                                                        | 1.51 | 0.016818 | 0.999919 |
| <i>Slc6a18</i>  | solute carrier family 6 (neurotransmitter transporter), member 18                         | 1.51 | 0.013217 | 0.999919 |
| <i>Wdr13</i>    | WD repeat domain 13                                                                       | 1.51 | 0.02321  | 0.999919 |

|                  |                                                              |      |          |          |
|------------------|--------------------------------------------------------------|------|----------|----------|
| <i>Dppa5a</i>    | developmental pluripotency associated 5A                     | 1.51 | 0.009488 | 0.999919 |
| <i>Arl13b</i>    | ADP-ribosylation factor-like 13B                             | 1.51 | 0.029164 | 0.999919 |
| <i>Otud7b</i>    | OTU domain containing 7B                                     | 1.52 | 0.033416 | 0.999919 |
| <i>Plek</i>      | pleckstrin                                                   | 1.52 | 0.021745 | 0.999919 |
| <i>Nlrc5</i>     | NLR family, CARD domain containing 5; microRNA 7072          | 1.52 | 0.009437 | 0.999919 |
| <i>Prl3d3</i>    | prolactin family 3, subfamily d, member 3                    | 1.52 | 0.020333 | 0.999919 |
| <i>Clcn7</i>     | chloride channel, voltage-sensitive 7                        | 1.52 | 0.045277 | 0.999919 |
| <i>Npr3</i>      | natriuretic peptide receptor 3                               | 1.53 | 0.015922 | 0.999919 |
| <i>Farsa</i>     | phenylalanyl-tRNA synthetase, alpha subunit                  | 1.53 | 0.017912 | 0.999919 |
| <i>Olfr1158</i>  | olfactory receptor 1158                                      | 1.55 | 0.008622 | 0.999919 |
| <i>Tmem45b</i>   | transmembrane protein 45b                                    | 1.55 | 0.046443 | 0.999919 |
| <i>Nlrp10</i>    | NLR family, pyrin domain containing 10                       | 1.56 | 0.016677 | 0.999919 |
| <i>Efr3a</i>     | EFR3 homolog A ( <i>S. cerevisiae</i> )                      | 1.56 | 0.027807 | 0.999919 |
| <i>Vax2</i>      | ventral anterior homeobox 2                                  | 1.57 | 0.024665 | 0.999919 |
| <i>Serpinb9c</i> | serine (or cysteine) peptidase inhibitor, clade B, member 9c | 1.58 | 0.013355 | 0.999919 |
| <i>Zscan29</i>   | zinc finger SCAN domains 29                                  | 1.62 | 0.023974 | 0.999919 |
| <i>Olfr877</i>   | olfactory receptor 877                                       | 1.63 | 0.001616 | 0.999919 |
| <i>Ttc41</i>     | tetratricopeptide repeat domain 41                           | 1.65 | 0.01689  | 0.999919 |
| <i>Car1</i>      | carbonic anhydrase 1                                         | 1.68 | 0.009815 | 0.999919 |
| <i>Vmn2r24</i>   | vomer nasal 2, receptor 24                                   | 1.69 | 0.014839 | 0.999919 |
| <i>Olfr904</i>   | olfactory receptor 904                                       | 1.76 | 0.047777 | 0.999919 |
| <i>Pnma3</i>     | paraneoplastic antigen MA3                                   | 1.87 | 0.031335 | 0.999919 |
| <i>Pqlc3</i>     | PQ loop repeat containing                                    | 1.88 | 0.035519 | 0.999919 |
| <i>Slc47a1</i>   | solute carrier family 47, member 1                           | 1.93 | 0.027549 | 0.999919 |
| <i>Ttll3</i>     | tubulin tyrosine ligase-like family, member 3                | 1.94 | 0.019458 | 0.999919 |
| <i>Cd59a</i>     | CD59a antigen                                                | 3.06 | 0.01836  | 0.999919 |
| <i>Ttr</i>       | transthyretin                                                | 6.64 | 0.026115 | 0.999919 |

**Table S11- Genes downregulated in the Prefrontal cortex of Ala92-Dio2 mice. (p<0.05)**

| Gene Symbol     | Description                                                          | Fold Change (linear) (AA Pre Frontal Cx vs. TT Pre Frontal Cx) | ANOVA p-value (AA Pre Frontal Cx vs. TT Pre Frontal Cx) | FDR p-value (AA Pre Frontal Cx vs. TT Pre Frontal Cx) |
|-----------------|----------------------------------------------------------------------|----------------------------------------------------------------|---------------------------------------------------------|-------------------------------------------------------|
| <i>Mid1</i>     | midline 1                                                            | -2.65                                                          | 0.0292                                                  | 0.999919                                              |
| <i>Mid1</i>     | midline 1                                                            | -2.65                                                          | 0.0292                                                  | 0.999919                                              |
| <i>Vmn1r122</i> | vomeronasal 1 receptor 122                                           | -2.62                                                          | 0.049469                                                | 0.999919                                              |
| <i>Mid1</i>     | midline 1                                                            | -2.53                                                          | 0.033521                                                | 0.999919                                              |
| <i>Erd1</i>     | erythroid differentiation regulator 1                                | -2.32                                                          | 0.043881                                                | 0.999919                                              |
| <i>Mrgprx2</i>  | MAS-related GPR, member X2                                           | -2.1                                                           | 0.011241                                                | 0.999919                                              |
| <i>Olfr77</i>   | olfactory receptor 77                                                | -2.03                                                          | 0.020094                                                | 0.999919                                              |
| <i>Olfr883</i>  | olfactory receptor 883                                               | -1.97                                                          | 0.019883                                                | 0.999919                                              |
| <i>Olfr243</i>  | olfactory receptor 243                                               | -1.95                                                          | 0.020899                                                | 0.999919                                              |
| <i>Klhl14</i>   | kelch-like 14                                                        | -1.94                                                          | 0.037885                                                | 0.999919                                              |
| <i>Olfr147</i>  | olfactory receptor 147                                               | -1.93                                                          | 0.004876                                                | 0.999919                                              |
| <i>Olfr1285</i> | olfactory receptor 1285                                              | -1.92                                                          | 0.048921                                                | 0.999919                                              |
| <i>Ccl3</i>     | chemokine (C-C motif) ligand 3                                       | -1.89                                                          | 0.023916                                                | 0.999919                                              |
| <i>Rgs1</i>     | regulator of G-protein signaling like 1                              | -1.79                                                          | 0.040271                                                | 0.999919                                              |
| <i>Tex11</i>    | testis expressed gene 11                                             | -1.79                                                          | 0.042696                                                | 0.999919                                              |
| <i>Vmn1r112</i> | vomeronasal 1 receptor 112                                           | -1.78                                                          | 0.000053                                                | 0.586974                                              |
| <i>Samd3</i>    | sterile alpha motif domain containing 3                              | -1.7                                                           | 0.025044                                                | 0.999919                                              |
| <i>Vmn1r222</i> | vomeronasal 1 receptor 222                                           | -1.7                                                           | 0.048312                                                | 0.999919                                              |
| <i>Cd244</i>    | CD244 natural killer cell receptor 2B4                               | -1.63                                                          | 0.011282                                                | 0.999919                                              |
| <i>Tas2r107</i> | taste receptor, type 2, member 107                                   | -1.63                                                          | 0.002443                                                | 0.999919                                              |
| <i>Klhl21</i>   | kelch-like 21                                                        | -1.62                                                          | 0.005642                                                | 0.999919                                              |
| <i>Obp1a</i>    | odorant binding protein IA                                           | -1.62                                                          | 0.025264                                                | 0.999919                                              |
| <i>Fam109b</i>  | family with sequence similarity 109, member B                        | -1.61                                                          | 0.032222                                                | 0.999919                                              |
| <i>Pnliprp1</i> | pancreatic lipase related protein 1                                  | -1.6                                                           | 0.022578                                                | 0.999919                                              |
| <i>Oas1f</i>    | 2-5 oligoadenylate synthetase 1F; 2'-5' oligoadenylate synthetase 1F | -1.6                                                           | 0.002379                                                | 0.999919                                              |
| <i>Ltf</i>      | lactotransferrin                                                     | -1.59                                                          | 0.00335                                                 | 0.999919                                              |
| <i>Gpr55</i>    | G protein-coupled receptor 55                                        | -1.58                                                          | 0.002944                                                | 0.999919                                              |
| <i>Crb2</i>     | crumbs family member 2                                               | -1.58                                                          | 0.033538                                                | 0.999919                                              |
| <i>Vmn1r87</i>  | vomeronasal 1 receptor 87                                            | -1.58                                                          | 0.007387                                                | 0.999919                                              |
| <i>Agmo</i>     | alkylglycerol monooxygenase                                          | -1.58                                                          | 0.003834                                                | 0.999919                                              |
| <i>Samd14</i>   | sterile alpha motif domain containing 14                             | -1.57                                                          | 0.01391                                                 | 0.999919                                              |
| <i>Qtrt1</i>    | queuine tRNA-ribosyltransferase 1                                    | -1.57                                                          | 0.038344                                                | 0.999919                                              |
| <i>Zfp125</i>   | zinc finger protein 125 [Source:MGI Symbol;Acc:MGI:1336211]          | -1.57                                                          | 0.003845                                                | 0.999919                                              |

|                    |                                                                                             |       |          |          |
|--------------------|---------------------------------------------------------------------------------------------|-------|----------|----------|
| <i>Adgrg2</i>      | adhesion G protein-coupled receptor G2                                                      | -1.57 | 0.020471 | 0.999919 |
| <i>Pdpn</i>        | podoplanin                                                                                  | -1.56 | 0.00184  | 0.999919 |
| <i>Rnase2b</i>     | ribonuclease, RNase A family, 2B (liver, eosinophil-derived neurotoxin)                     | -1.56 | 0.044088 | 0.999919 |
| <i>Hps6</i>        | Hermansky-Pudlak syndrome 6                                                                 | -1.55 | 0.023239 | 0.999919 |
| <i>Msh4</i>        | mutS homolog 4 (E. coli)                                                                    | -1.55 | 0.030502 | 0.999919 |
| <i>Tdpoz4</i>      | TD and POZ domain containing 4                                                              | -1.55 | 0.001513 | 0.999919 |
| <i>Pth</i>         | parathyroid hormone                                                                         | -1.55 | 0.048317 | 0.999919 |
| <i>Serpinb11</i>   | serine (or cysteine) peptidase inhibitor, clade B (ovalbumin), member 11                    | -1.54 | 0.03484  | 0.999919 |
| <i>Pgpep1l</i>     | pyroglutamyl-peptidase I-like                                                               | -1.54 | 0.009006 | 0.999919 |
| <i>Olfr911-ps1</i> | olfactory receptor 911, pseudogene 1                                                        | -1.54 | 0.010198 | 0.999919 |
| <i>Olfr180</i>     | olfactory receptor 180                                                                      | -1.54 | 0.012659 | 0.999919 |
| <i>Zfp869</i>      | zinc finger protein 869                                                                     | -1.53 | 0.026618 | 0.999919 |
| <i>Vmn1r11</i>     | vomer nasal 1 receptor 11                                                                   | -1.53 | 0.004033 | 0.999919 |
| <i>Sfrp2</i>       | secreted frizzled-related protein 2                                                         | -1.52 | 0.018472 | 0.999919 |
| <i>Mex3d</i>       | mex3 homolog D (C. elegans)                                                                 | -1.52 | 0.023413 | 0.999919 |
| <i>Ndufa13</i>     | NADH dehydrogenase (ubiquinone) 1 alpha subcomplex, 13; YjeF N-terminal domain containing 3 | -1.51 | 0.009251 | 0.999919 |
| <i>Nhej1</i>       | nonhomologous end-joining factor 1                                                          | -1.51 | 0.000036 | 0.586974 |
| <i>Hmgb2</i>       | high mobility group box 2                                                                   | -1.5  | 0.029268 | 0.999919 |
| <i>Tha1</i>        | threonine aldolase 1                                                                        | -1.5  | 0.029927 | 0.999919 |
| <i>Gtf2h3</i>      | general transcription factor IIH, polypeptide 3                                             | -1.5  | 0.034726 | 0.999919 |
| <i>Kcna5</i>       | potassium voltage-gated channel, shaker-related subfamily, member 5                         | -1.5  | 0.001856 | 0.999919 |
| <i>Olfr316</i>     | olfactory receptor 316                                                                      | -1.5  | 0.044826 | 0.999919 |
| <i>Cdk3-ps</i>     | cyclin-dependent kinase 3, pseudogene                                                       | -1.5  | 0.01112  | 0.999919 |
| <i>Olfr837</i>     | olfactory receptor 837                                                                      | -1.49 | 0.003481 | 0.999919 |
| <i>Oxtr</i>        | oxytocin receptor                                                                           | -1.49 | 0.014787 | 0.999919 |
| <i>Usp18</i>       | ubiquitin specific peptidase 18                                                             | -1.49 | 0.015111 | 0.999919 |
| <i>Lsm7</i>        | LSM7 homolog, U6 small nuclear RNA associated (S. cerevisiae)                               | -1.49 | 0.046512 | 0.999919 |
| <i>Ccbl2</i>       | cysteine conjugate-beta lyase 2                                                             | -1.48 | 0.004513 | 0.999919 |
| <i>Actl7a</i>      | actin-like 7a                                                                               | -1.48 | 0.039757 | 0.999919 |
| <i>Orc1</i>        | origin recognition complex, subunit 1                                                       | -1.48 | 0.008631 | 0.999919 |
| <i>Cblc</i>        | Casitas B-lineage lymphoma c                                                                | -1.48 | 0.012031 | 0.999919 |
| <i>Olfr943</i>     | olfactory receptor 943                                                                      | -1.48 | 0.016581 | 0.999919 |
| <i>Bcl2a1d</i>     | B cell leukemia/lymphoma 2 related protein A1d                                              | -1.48 | 0.034982 | 0.999919 |
| <i>Olfr807</i>     | olfactory receptor 807                                                                      | -1.48 | 0.039181 | 0.999919 |
| <i>Sh3rf2</i>      | SH3 domain containing ring finger 2                                                         | -1.48 | 0.009105 | 0.999919 |

|                 |                                                                                                                                     |       |          |          |
|-----------------|-------------------------------------------------------------------------------------------------------------------------------------|-------|----------|----------|
| <i>Ppp2r3d</i>  | protein phosphatase 2 (formerly 2A), regulatory subunit B, delta; protein phosphatase 2 (formerly 2A), regulatory subunit B", delta | -1.47 | 0.041497 | 0.999919 |
| <i>Nphs2</i>    | nephrosis 2, podocin                                                                                                                | -1.47 | 0.003716 | 0.999919 |
| <i>Acbd7</i>    | acyl-Coenzyme A binding domain containing 7                                                                                         | -1.47 | 0.030712 | 0.999919 |
| <i>Mpp4</i>     | membrane protein, palmitoylated 4 (MAGUK p55 subfamily member 4)                                                                    | -1.46 | 0.040094 | 0.999919 |
| <i>Fam227b</i>  | family with sequence similarity 227, member B                                                                                       | -1.46 | 0.045022 | 0.999919 |
| <i>Gzmf</i>     | granzyme F                                                                                                                          | -1.46 | 0.000389 | 0.999919 |
| <i>Wnt9b</i>    | wingless-type MMTV integration site family, member 9B                                                                               | -1.46 | 0.031133 | 0.999919 |
| <i>Dgcr6</i>    | DiGeorge syndrome critical region gene 6                                                                                            | -1.46 | 0.019353 | 0.999919 |
| <i>Lcn5</i>     | lipocalin 5                                                                                                                         | -1.45 | 0.011412 | 0.999919 |
| <i>Agpat2</i>   | 1-acylglycerol-3-phosphate O-acyltransferase 2 (lysophosphatidic acid acyltransferase, beta)                                        | -1.45 | 0.002808 | 0.999919 |
| <i>Depdc7</i>   | DEP domain containing 7                                                                                                             | -1.45 | 0.02768  | 0.999919 |
| <i>Syce1</i>    | synaptonemal complex central element protein 1                                                                                      | -1.45 | 0.00756  | 0.999919 |
| <i>Mmp2</i>     | matrix metalloproteinase 2                                                                                                          | -1.45 | 0.025379 | 0.999919 |
| <i>Tmed6</i>    | transmembrane emp24 protein transport domain containing 6                                                                           | -1.45 | 0.009284 | 0.999919 |
| <i>Rsph14</i>   | radial spoke head homolog 14 (Chlamydomonas)                                                                                        | -1.45 | 0.011001 | 0.999919 |
| <i>Olfr773</i>  | olfactory receptor 773                                                                                                              | -1.45 | 0.045817 | 0.999919 |
| <i>Tmsb15a</i>  | thymosin beta 15a                                                                                                                   | -1.44 | 0.011804 | 0.999919 |
| <i>Olfr314</i>  | olfactory receptor 314                                                                                                              | -1.44 | 0.039362 | 0.999919 |
| <i>Chchd5</i>   | coiled-coil-helix-coiled-coil-helix domain containing 5                                                                             | -1.43 | 0.031916 | 0.999919 |
| <i>Olfr1386</i> | olfactory receptor 1386                                                                                                             | -1.43 | 0.005032 | 0.999919 |
| <i>Pgk2</i>     | phosphoglycerate kinase 2                                                                                                           | -1.43 | 0.047303 | 0.999919 |
| <i>Klrb1f</i>   | killer cell lectin-like receptor subfamily B member 1F                                                                              | -1.43 | 0.024027 | 0.999919 |
| <i>Bcl2l14</i>  | BCL2-like 14 (apoptosis facilitator)                                                                                                | -1.43 | 0.034484 | 0.999919 |
| <i>Olfr118</i>  | olfactory receptor 118                                                                                                              | -1.43 | 0.04957  | 0.999919 |
| <i>Gimap4</i>   | GTPase, IMAP family member 4                                                                                                        | -1.42 | 0.037748 | 0.999919 |
| <i>Crip3</i>    | cysteine-rich protein 3                                                                                                             | -1.42 | 0.029165 | 0.999919 |
| <i>Srf</i>      | serum response factor                                                                                                               | -1.42 | 0.019696 | 0.999919 |
| <i>Mfsd7c</i>   | major facilitator superfamily domain containing 7C                                                                                  | -1.41 | 0.003359 | 0.999919 |
| <i>Stk31</i>    | serine threonine kinase 31                                                                                                          | -1.41 | 0.016883 | 0.999919 |
| <i>Fabp1</i>    | fatty acid binding protein 1, liver                                                                                                 | -1.41 | 0.035511 | 0.999919 |
| <i>Pld6</i>     | phospholipase D family, member 6                                                                                                    | -1.41 | 0.013794 | 0.999919 |



|                 |                                                                                                   |       |          |          |
|-----------------|---------------------------------------------------------------------------------------------------|-------|----------|----------|
| <i>Olfr1179</i> | olfactory receptor 1179                                                                           | -1.4  | 0.040924 | 0.999919 |
| <i>Tbxa2r</i>   | thromboxane A2 receptor                                                                           | -1.4  | 0.022473 | 0.999919 |
| <i>Pkdrej</i>   | polycystic kidney disease (polycystin) and REJ (sperm receptor for egg jelly homolog, sea urchin) | -1.4  | 0.023044 | 0.999919 |
| <i>Olfr135</i>  | olfactory receptor 135                                                                            | -1.4  | 0.000932 | 0.999919 |
| <i>Mlana</i>    | melan-A                                                                                           | -1.4  | 0.03072  | 0.999919 |
| <i>Pcdh11x</i>  | protocadherin 11 X-linked                                                                         | -1.39 | 0.043316 | 0.999919 |
| <i>Vps37b</i>   | vacuolar protein sorting 37B (yeast)                                                              | -1.39 | 0.032364 | 0.999919 |
| <i>Nup210</i>   | nucleoporin 210                                                                                   | -1.39 | 0.035934 | 0.999919 |
| <i>Esr1</i>     | estrogen receptor 1 (alpha)                                                                       | -1.39 | 0.039817 | 0.999919 |
| <i>Ltv1</i>     | LTV1 homolog (S. cerevisiae)                                                                      | -1.39 | 0.010767 | 0.999919 |
| <i>Tgm5</i>     | transglutaminase 5                                                                                | -1.38 | 0.008372 | 0.999919 |
| <i>Akr1cl</i>   | aldo-keto reductase family 1, member C-like                                                       | -1.38 | 0.033942 | 0.999919 |
| <i>Fgd5</i>     | FYVE, RhoGEF and PH domain containing 5                                                           | -1.38 | 0.021196 | 0.999919 |
| <i>Vmn2r22</i>  | vomeronal 2, receptor 22                                                                          | -1.38 | 0.004995 | 0.999919 |
| <i>Olfr9</i>    | olfactory receptor 9                                                                              | -1.38 | 0.046248 | 0.999919 |
| <i>Olfr394</i>  | olfactory receptor 394                                                                            | -1.38 | 0.006027 | 0.999919 |
| <i>Xlr5b</i>    | X-linked lymphocyte-regulated 5B                                                                  | -1.37 | 0.006775 | 0.999919 |
| <i>Cyp2j9</i>   | cytochrome P450, family 2, subfamily j, polypeptide 9                                             | -1.36 | 0.033475 | 0.999919 |
| <i>Ccdc153</i>  | coiled-coil domain containing 153                                                                 | -1.36 | 0.040656 | 0.999919 |
| <i>Olfr272</i>  | olfactory receptor 272                                                                            | -1.36 | 0.022428 | 0.999919 |
| <i>Nlrp4c</i>   | NLR family, pyrin domain containing 4C                                                            | -1.36 | 0.0094   | 0.999919 |
| <i>Tmigd1</i>   | transmembrane and immunoglobulin domain containing 1                                              | -1.36 | 0.015208 | 0.999919 |
| <i>Ppp1r18</i>  | protein phosphatase 1, regulatory subunit 18                                                      | -1.36 | 0.004394 | 0.999919 |
| <i>Dnah6</i>    | dynein, axonemal, heavy chain 6                                                                   | -1.35 | 0.046051 | 0.999919 |
| <i>Car9</i>     | carbonic anhydrase 9                                                                              | -1.35 | 0.001255 | 0.999919 |
| <i>Med29</i>    | mediator complex subunit 29                                                                       | -1.35 | 0.002234 | 0.999919 |
| <i>Gucy2e</i>   | guanylate cyclase 2e                                                                              | -1.35 | 0.001504 | 0.999919 |
| <i>Galnt10</i>  | UDP-N-acetyl-alpha-D-galactosamine:polypeptide N-acetylgalactosaminyltransferase 10               | -1.35 | 0.022183 | 0.999919 |
| <i>Fancl</i>    | Fanconi anemia, complementation group L                                                           | -1.35 | 0.025776 | 0.999919 |
| <i>Fhit</i>     | fragile histidine triad gene                                                                      | -1.35 | 0.024509 | 0.999919 |
| <i>Olfr16</i>   | olfactory receptor 16                                                                             | -1.35 | 0.036608 | 0.999919 |
| <i>Olfr1023</i> | olfactory receptor 1023                                                                           | -1.35 | 0.002866 | 0.999919 |
| <i>Tfpi</i>     | tissue factor pathway inhibitor                                                                   | -1.35 | 0.010841 | 0.999919 |
| <i>Olfr1164</i> | olfactory receptor 1164                                                                           | -1.35 | 0.010076 | 0.999919 |
| <i>Gnat2</i>    | guanine nucleotide binding protein, alpha transducing 2                                           | -1.35 | 0.047338 | 0.999919 |
| <i>Papolb</i>   | poly (A) polymerase beta (testis specific)                                                        | -1.35 | 0.014935 | 0.999919 |
| <i>Gdnf</i>     | glial cell line derived neurotrophic factor                                                       | -1.35 | 0.010525 | 0.999919 |

|                 |                                                                                                                                                                                                                                                                                                                                                                                                                                                                                                                                                                                                                                                 |       |          |          |
|-----------------|-------------------------------------------------------------------------------------------------------------------------------------------------------------------------------------------------------------------------------------------------------------------------------------------------------------------------------------------------------------------------------------------------------------------------------------------------------------------------------------------------------------------------------------------------------------------------------------------------------------------------------------------------|-------|----------|----------|
| <i>Sgpp2</i>    | sphingosine-1-phosphate phosphatase 2                                                                                                                                                                                                                                                                                                                                                                                                                                                                                                                                                                                                           | -1.34 | 0.024056 | 0.999919 |
| <i>Prlr</i>     | prolactin receptor                                                                                                                                                                                                                                                                                                                                                                                                                                                                                                                                                                                                                              | -1.34 | 0.017139 | 0.999919 |
| <i>Cenpc1</i>   | centromere protein C1                                                                                                                                                                                                                                                                                                                                                                                                                                                                                                                                                                                                                           | -1.34 | 0.040097 | 0.999919 |
| <i>Olfr1412</i> | olfactory receptor 1412                                                                                                                                                                                                                                                                                                                                                                                                                                                                                                                                                                                                                         | -1.34 | 0.046753 | 0.999919 |
| <i>Vmn2r41</i>  | vomeronal 2, receptor 41                                                                                                                                                                                                                                                                                                                                                                                                                                                                                                                                                                                                                        | -1.34 | 0.043263 | 0.999919 |
| <i>Tmem221</i>  | transmembrane protein 221                                                                                                                                                                                                                                                                                                                                                                                                                                                                                                                                                                                                                       | -1.34 | 0.032175 | 0.999919 |
| <i>Srebf1</i>   | sterol regulatory element binding transcription factor 1; microRNA 6922                                                                                                                                                                                                                                                                                                                                                                                                                                                                                                                                                                         | -1.34 | 0.007319 | 0.999919 |
| <i>Nox3</i>     | NADPH oxidase 3                                                                                                                                                                                                                                                                                                                                                                                                                                                                                                                                                                                                                                 | -1.34 | 0.03113  | 0.999919 |
| <i>Ceacam5</i>  | carcinoembryonic antigen-related cell adhesion molecule 5                                                                                                                                                                                                                                                                                                                                                                                                                                                                                                                                                                                       | -1.33 | 0.04802  | 0.999919 |
| <i>Pigg</i>     | phosphatidylinositol glycan anchor biosynthesis, class G                                                                                                                                                                                                                                                                                                                                                                                                                                                                                                                                                                                        | -1.33 | 0.014012 | 0.999919 |
| <i>Cox7b2</i>   | cytochrome c oxidase subunit VIIb2                                                                                                                                                                                                                                                                                                                                                                                                                                                                                                                                                                                                              | -1.33 | 0.017515 | 0.999919 |
| <i>Sec1</i>     | secretory blood group 1                                                                                                                                                                                                                                                                                                                                                                                                                                                                                                                                                                                                                         | -1.33 | 0.00159  | 0.999919 |
| <i>Sfta2</i>    | surfactant associated 2                                                                                                                                                                                                                                                                                                                                                                                                                                                                                                                                                                                                                         | -1.33 | 0.015405 | 0.999919 |
| <i>H2-M9</i>    | histocompatibility 2, M region locus 9                                                                                                                                                                                                                                                                                                                                                                                                                                                                                                                                                                                                          | -1.33 | 0.032414 | 0.999919 |
| <i>Klc4</i>     | kinesin light chain 4                                                                                                                                                                                                                                                                                                                                                                                                                                                                                                                                                                                                                           | -1.33 | 0.042578 | 0.999919 |
| <i>Zfp467</i>   | zinc finger protein 467                                                                                                                                                                                                                                                                                                                                                                                                                                                                                                                                                                                                                         | -1.32 | 0.030146 | 0.999919 |
| <i>Hoxc5</i>    | homeobox C5                                                                                                                                                                                                                                                                                                                                                                                                                                                                                                                                                                                                                                     | -1.32 | 0.004021 | 0.999919 |
| <i>Crabp1</i>   | cellular retinoic acid binding protein I                                                                                                                                                                                                                                                                                                                                                                                                                                                                                                                                                                                                        | -1.32 | 0.032255 | 0.999919 |
| <i>Dusp23</i>   | dual specificity phosphatase 23                                                                                                                                                                                                                                                                                                                                                                                                                                                                                                                                                                                                                 | -1.32 | 0.010532 | 0.999919 |
| <i>Hsd3b4</i>   | hydroxy-delta-5-steroid dehydrogenase, 3 beta- and steroid delta-isomerase 4 (Hsd3b4), transcript variant 1, mRNA.; predicted gene 10681 (Gm10681), mRNA.; hydroxy-delta-5-steroid dehydrogenase, 3 beta- and steroid delta-isomerase 4 (Hsd3b4), transcript variant 2, mRNA.; predicted gene 10681 [Source:MGI Symbol;Acc:MGI:3711284]; hydroxy-delta-5-steroid dehydrogenase, 3 beta- and steroid delta-isomerase 4, mRNA (cDNA clone MGC:18496 IMAGE:4221849), complete cds.; hydroxy-delta-5-steroid dehydrogenase, 3 beta- and steroid delta-isomerase 4, mRNA (cDNA clone MGC:164033 IMAGE:40130679), complete cds.; predicted gene 10681 | -1.32 | 0.010476 | 0.999919 |
| <i>Olfr643</i>  | olfactory receptor 643; olfactory receptor 639                                                                                                                                                                                                                                                                                                                                                                                                                                                                                                                                                                                                  | -1.32 | 0.017997 | 0.999919 |
| <i>Miox</i>     | myo-inositol oxygenase                                                                                                                                                                                                                                                                                                                                                                                                                                                                                                                                                                                                                          | -1.32 | 0.004579 | 0.999919 |
| <i>Vmn2r96</i>  | vomeronal 2, receptor 96                                                                                                                                                                                                                                                                                                                                                                                                                                                                                                                                                                                                                        | -1.32 | 0.047353 | 0.999919 |
| <i>Sfxn3</i>    | sideroflexin 3                                                                                                                                                                                                                                                                                                                                                                                                                                                                                                                                                                                                                                  | -1.31 | 0.026332 | 0.999919 |
| <i>Sdhc</i>     | succinate dehydrogenase complex, subunit C, integral membrane protein                                                                                                                                                                                                                                                                                                                                                                                                                                                                                                                                                                           | -1.31 | 0.011712 | 0.999919 |

|                 |                                                                                             |       |          |          |
|-----------------|---------------------------------------------------------------------------------------------|-------|----------|----------|
| <i>Bbs12</i>    | Bardet-Biedl syndrome 12 (human)                                                            | -1.31 | 0.025385 | 0.999919 |
| <i>Tyr</i>      | tyrosinase                                                                                  | -1.31 | 0.017354 | 0.999919 |
| <i>Dmrtc1c1</i> | DMRT-like family C1c1; DMRT-like family C1c2                                                | -1.31 | 0.012153 | 0.999919 |
| <i>Mbl2</i>     | mannose-binding lectin (protein C) 2                                                        | -1.31 | 0.028349 | 0.999919 |
| <i>Spin4</i>    | spindlin family, member 4                                                                   | -1.3  | 0.020319 | 0.999919 |
| <i>Vmn2r46</i>  | vomeronasal 2, receptor 46                                                                  | -1.3  | 0.021181 | 0.999919 |
| <i>Lpin3</i>    | lipin 3                                                                                     | -1.3  | 0.028804 | 0.999919 |
| <i>Olfr1101</i> | olfactory receptor 1101                                                                     | -1.3  | 0.032772 | 0.999919 |
| <i>Lama5</i>    | laminin, alpha 5                                                                            | -1.3  | 0.02579  | 0.999919 |
| <i>Prok1</i>    | prokineticin 1                                                                              | -1.3  | 0.041259 | 0.999919 |
| <i>Acsm1</i>    | acyl-CoA synthetase medium-chain family member 1                                            | -1.3  | 0.002076 | 0.999919 |
| <i>Mrpl4</i>    | mitochondrial ribosomal protein L4                                                          | -1.3  | 0.008819 | 0.999919 |
| <i>Rln1</i>     | relaxin 1                                                                                   | -1.3  | 0.01501  | 0.999919 |
| <i>Plekhg4</i>  | pleckstrin homology domain containing, family G (with RhoGef domain) member 4               | -1.29 | 0.037182 | 0.999919 |
| <i>Ppp2r1b</i>  | protein phosphatase 2, regulatory subunit A, beta                                           | -1.29 | 0.03875  | 0.999919 |
| <i>Vmn1r36</i>  | vomeronasal 1 receptor 36                                                                   | -1.29 | 0.009924 | 0.999919 |
| <i>Fank1</i>    | fibronectin type 3 and ankyrin repeat domains 1                                             | -1.29 | 0.018312 | 0.999919 |
| <i>Slc26a3</i>  | solute carrier family 26, member 3                                                          | -1.29 | 0.035681 | 0.999919 |
| <i>Sowahd</i>   | sosondowah ankyrin repeat domain family member D                                            | -1.28 | 0.001397 | 0.999919 |
| <i>Fundc2</i>   | FUN14 domain containing 2                                                                   | -1.28 | 0.047684 | 0.999919 |
| <i>Arl4d</i>    | ADP-ribosylation factor-like 4D                                                             | -1.28 | 0.023032 | 0.999919 |
| <i>H1fx</i>     | H1 histone family, member X                                                                 | -1.28 | 0.04732  | 0.999919 |
| <i>Hmcn1</i>    | hemicentin 1                                                                                | -1.28 | 0.041559 | 0.999919 |
| <i>Olfr703</i>  | olfactory receptor 703                                                                      | -1.28 | 0.038946 | 0.999919 |
| <i>Cldn34c4</i> | claudin 34C4                                                                                | -1.28 | 0.043782 | 0.999919 |
| <i>Olfr1082</i> | olfactory receptor 1082                                                                     | -1.27 | 0.018393 | 0.999919 |
| <i>Ccdc125</i>  | coiled-coil domain containing 125                                                           | -1.27 | 0.01372  | 0.999919 |
| <i>Defb9</i>    | defensin beta 9                                                                             | -1.27 | 0.034485 | 0.999919 |
| <i>Reg2</i>     | regenerating islet-derived 2                                                                | -1.27 | 0.048125 | 0.999919 |
| <i>Ccdc169</i>  | coiled-coil domain containing 169                                                           | -1.27 | 0.044732 | 0.999919 |
| <i>Myct1</i>    | myc target 1                                                                                | -1.27 | 0.027003 | 0.999919 |
| <i>Taar7d</i>   | trace amine-associated receptor 7D                                                          | -1.27 | 0.012009 | 0.999919 |
| <i>Ddit3</i>    | DNA-damage inducible transcript 3                                                           | -1.27 | 0.010927 | 0.999919 |
| <i>Smtnl2</i>   | smoothelin-like 2                                                                           | -1.27 | 0.048071 | 0.999919 |
| <i>Glrx5</i>    | glutaredoxin 5 homolog ( <i>S. cerevisiae</i> )                                             | -1.27 | 0.049693 | 0.999919 |
| <i>Slc25a29</i> | solute carrier family 25 (mitochondrial carrier, palmitoylcarnitine transporter), member 29 | -1.26 | 0.009098 | 0.999919 |
| <i>Mtpap</i>    | mitochondrial poly(A) polymerase                                                            | -1.26 | 0.027655 | 0.999919 |

|                 |                                                                |       |          |          |
|-----------------|----------------------------------------------------------------|-------|----------|----------|
| <i>Adam39</i>   | a disintegrin and metallopeptidase domain 39                   | -1.26 | 0.044889 | 0.999919 |
| <i>Zfp503</i>   | zinc finger protein 503                                        | -1.26 | 0.008074 | 0.999919 |
| <i>Dusp28</i>   | dual specificity phosphatase 28                                | -1.26 | 0.048775 | 0.999919 |
| <i>Lmod1</i>    | leiomodulin 1 (smooth muscle)                                  | -1.26 | 0.03012  | 0.999919 |
| <i>Commd7</i>   | COMM domain containing 7                                       | -1.26 | 0.018271 | 0.999919 |
| <i>Btk</i>      | Bruton agammaglobulinemia tyrosine kinase                      | -1.26 | 0.028026 | 0.999919 |
| <i>Olfr765</i>  | olfactory receptor 765                                         | -1.26 | 0.020341 | 0.999919 |
| <i>Il9r</i>     | interleukin 9 receptor                                         | -1.26 | 0.029707 | 0.999919 |
| <i>Efcab5</i>   | EF-hand calcium binding domain 5                               | -1.26 | 0.031802 | 0.999919 |
| <i>Mtl5</i>     | metallothionein-like 5, testis-specific (tesmin)               | -1.26 | 0.042098 | 0.999919 |
| <i>Kif22</i>    | kinesin family member 22                                       | -1.25 | 0.000245 | 0.999919 |
| <i>Ecsit</i>    | ECSIT homolog (Drosophila)                                     | -1.25 | 0.01082  | 0.999919 |
| <i>Ppef2</i>    | protein phosphatase, EF hand calcium-binding domain 2          | -1.25 | 0.03846  | 0.999919 |
| <i>Prss43</i>   | protease, serine 43                                            | -1.25 | 0.003964 | 0.999919 |
| <i>Dux</i>      | double homeobox                                                | -1.25 | 0.024476 | 0.999919 |
| <i>Sar1b</i>    | SAR1 gene homolog B ( <i>S. cerevisiae</i> )                   | -1.25 | 0.01126  | 0.999919 |
| <i>Prr15l</i>   | proline rich 15-like                                           | -1.25 | 0.01871  | 0.999919 |
| <i>Cryba1</i>   | crystallin, beta A1                                            | -1.25 | 0.000416 | 0.999919 |
| <i>Akr1c13</i>  | aldo-keto reductase family 1, member C13                       | -1.25 | 0.046663 | 0.999919 |
| <i>Icosl</i>    | icos ligand                                                    | -1.24 | 0.039936 | 0.999919 |
| <i>Il20</i>     | interleukin 20                                                 | -1.24 | 0.046712 | 0.999919 |
| <i>Slc45a3</i>  | solute carrier family 45, member 3                             | -1.24 | 0.018713 | 0.999919 |
| <i>Olfr57</i>   | olfactory receptor 57                                          | -1.24 | 0.010833 | 0.999919 |
| <i>Sox17</i>    | SRY (sex determining region Y)-box 17                          | -1.24 | 0.01633  | 0.999919 |
| <i>Ttc22</i>    | tetratricopeptide repeat domain 22                             | -1.24 | 0.020938 | 0.999919 |
| <i>Fam212a</i>  | family with sequence similarity 212, member A                  | -1.24 | 0.015299 | 0.999919 |
| <i>Olfr1353</i> | olfactory receptor 1353                                        | -1.24 | 0.016796 | 0.999919 |
| <i>Olfr1356</i> | olfactory receptor 1356                                        | -1.24 | 0.030153 | 0.999919 |
| <i>Utp14a</i>   | UTP14, U3 small nucleolar ribonucleoprotein, homolog A (yeast) | -1.23 | 0.010518 | 0.999919 |
| <i>Jakmip3</i>  | janus kinase and microtubule interacting protein 3             | -1.23 | 0.026602 | 0.999919 |
| <i>Ankrd36</i>  | ankyrin repeat domain 36                                       | -1.23 | 0.031168 | 0.999919 |
| <i>Dse</i>      | dermatan sulfate epimerase                                     | -1.23 | 0.014223 | 0.999919 |
| <i>Tns1</i>     | tensin 1                                                       | -1.23 | 0.036378 | 0.999919 |
| <i>Slc19a3</i>  | solute carrier family 19, member 3                             | -1.23 | 0.035847 | 0.999919 |
| <i>Slfn1</i>    | schlafen like 1                                                | -1.23 | 0.026115 | 0.999919 |
| <i>Vmn2r48</i>  | vomer nasal 2, receptor 48                                     | -1.23 | 0.031187 | 0.999919 |
| <i>Olfr176</i>  | olfactory receptor 176; olfactory receptor 177                 | -1.23 | 0.045764 | 0.999919 |
| <i>Tmem217</i>  | transmembrane protein 217                                      | -1.23 | 0.008666 | 0.999919 |

|                 |                                                                                             |       |          |          |
|-----------------|---------------------------------------------------------------------------------------------|-------|----------|----------|
| <i>Creb5</i>    | cAMP responsive element binding protein 5; RIKEN cDNA 9430076C15 gene                       | -1.22 | 0.033695 | 0.999919 |
| <i>C5ar1</i>    | complement component 5a receptor 1                                                          | -1.22 | 0.022478 | 0.999919 |
| <i>Myh3</i>     | myosin, heavy polypeptide 3, skeletal muscle, embryonic                                     | -1.22 | 0.027027 | 0.999919 |
| <i>Arfgef1</i>  | ADP-ribosylation factor guanine nucleotide-exchange factor 1(brefeldin A-inhibited)         | -1.21 | 0.043908 | 0.999919 |
| <i>Iqca</i>     | IQ motif containing with AAA domain                                                         | -1.21 | 0.022362 | 0.999919 |
| <i>Cst9</i>     | cystatin 9                                                                                  | -1.21 | 0.048612 | 0.999919 |
| <i>Olfr1341</i> | olfactory receptor 1341                                                                     | -1.21 | 0.038295 | 0.999919 |
| <i>Ccl19</i>    | chemokine (C-C motif) ligand 19                                                             | -1.21 | 0.020858 | 0.999919 |
| <i>Ccr12</i>    | chemokine (C-C motif) receptor-like 2                                                       | -1.21 | 0.036214 | 0.999919 |
| <i>Ifi47</i>    | interferon gamma inducible protein 47; olfactory receptor 56                                | -1.21 | 0.049162 | 0.999919 |
| <i>Lrrn4cl</i>  | LRRN4 C-terminal like                                                                       | -1.21 | 0.035503 | 0.999919 |
| <i>Nbea</i>     | neurobeachin                                                                                | -1.2  | 0.016247 | 0.999919 |
| <i>Tspan31</i>  | tetraspanin 31                                                                              | -1.2  | 0.043648 | 0.999919 |
| <i>Mgarp</i>    | mitochondria localized glutamic acid rich protein                                           | -1.2  | 0.016404 | 0.999919 |
| <i>Gigyf1</i>   | GRB10 interacting GYF protein 1                                                             | -1.2  | 0.013841 | 0.999919 |
| <i>Prodh2</i>   | proline dehydrogenase (oxidase) 2                                                           | -1.2  | 0.043982 | 0.999919 |
| <i>Myl7</i>     | myosin, light polypeptide 7, regulatory                                                     | -1.2  | 0.016401 | 0.999919 |
| <i>Olfr1458</i> | olfactory receptor 1458                                                                     | -1.2  | 0.000983 | 0.999919 |
| <i>Rab43</i>    | RAB43, member RAS oncogene family                                                           | -1.19 | 0.023442 | 0.999919 |
| <i>Gorab</i>    | golgin, RAB6-interacting                                                                    | -1.19 | 0.035394 | 0.999919 |
| <i>Trim54</i>   | tripartite motif-containing 54                                                              | -1.19 | 0.019554 | 0.999919 |
| <i>Dynlrb1</i>  | dynein light chain roadblock-type 1                                                         | -1.19 | 0.00321  | 0.999919 |
| <i>Phb2</i>     | prohibitin 2                                                                                | -1.19 | 0.033338 | 0.999919 |
| <i>Plcg1</i>    | phospholipase C, gamma 1                                                                    | -1.19 | 0.00291  | 0.999919 |
| <i>Iqcd</i>     | IQ motif containing D                                                                       | -1.19 | 0.018679 | 0.999919 |
| <i>Olfr862</i>  | olfactory receptor 862                                                                      | -1.19 | 0.028998 | 0.999919 |
| <i>Ntsr2</i>    | neurotensin receptor 2                                                                      | -1.19 | 0.03885  | 0.999919 |
| <i>Nlrc3</i>    | NLR family, CARD domain containing 3                                                        | -1.19 | 0.024032 | 0.999919 |
| <i>Umodl1</i>   | uromodulin-like 1                                                                           | -1.19 | 0.01235  | 0.999919 |
| <i>Pgc</i>      | progastricsin (pepsinogen C)                                                                | -1.19 | 0.049751 | 0.999919 |
| <i>Slc25a45</i> | solute carrier family 25, member 45                                                         | -1.19 | 0.047083 | 0.999919 |
| <i>Trex1</i>    | three prime repair exonuclease 1; ATR interacting protein                                   | -1.18 | 0.006324 | 0.999919 |
| <i>Flnc</i>     | filamin C, gamma                                                                            | -1.18 | 0.047084 | 0.999919 |
| <i>Efcab8</i>   | EF-hand calcium binding domain 8                                                            | -1.18 | 0.031362 | 0.999919 |
| <i>Zfp772</i>   | zinc finger protein 772                                                                     | -1.18 | 0.039834 | 0.999919 |
| <i>Krt4</i>     | keratin 4                                                                                   | -1.18 | 0.0217   | 0.999919 |
| <i>Slc25a5</i>  | solute carrier family 25 (mitochondrial carrier, adenine nucleotide translocator), member 5 | -1.17 | 0.030008 | 0.999919 |

|                 |                                                                                   |       |          |          |
|-----------------|-----------------------------------------------------------------------------------|-------|----------|----------|
| <i>Hao2</i>     | hydroxyacid oxidase 2                                                             | -1.17 | 0.041552 | 0.999919 |
| <i>Slc7a9</i>   | solute carrier family 7 (cationic amino acid transporter, y+ system), member 9    | -1.17 | 0.038962 | 0.999919 |
| <i>Phox2a</i>   | paired-like homeobox 2a                                                           | -1.17 | 0.022342 | 0.999919 |
| <i>Ssty2</i>    | spermiogenesis specific transcript on the Y 2                                     | -1.17 | 0.037048 | 0.999919 |
| <i>Atp8b3</i>   | ATPase, class I, type 8B, member 3                                                | -1.17 | 0.019509 | 0.999919 |
| <i>Peo1</i>     | progressive external ophthalmoplegia 1 (human)                                    | -1.17 | 0.016199 | 0.999919 |
| <i>Zfyve9</i>   | zinc finger, FYVE domain containing 9                                             | -1.16 | 0.006727 | 0.999919 |
| <i>Arid4b</i>   | AT rich interactive domain 4B (RBP1-like)                                         | -1.16 | 0.018962 | 0.999919 |
| <i>Eef1a1</i>   | eukaryotic translation elongation factor 1 alpha 1                                | -1.16 | 0.022582 | 0.999919 |
| <i>Kir3dl1</i>  | killer cell immunoglobulin-like receptor, three domains, long cytoplasmic tail, 1 | -1.16 | 0.048069 | 0.999919 |
| <i>Tsga8</i>    | testis specific gene A8                                                           | -1.16 | 0.01473  | 0.999919 |
| <i>Spz1</i>     | spermatogenic leucine zipper 1                                                    | -1.16 | 0.027363 | 0.999919 |
| <i>Zfp758</i>   | zinc finger protein 758                                                           | -1.16 | 0.034907 | 0.999919 |
| <i>Sncg</i>     | synuclein, gamma                                                                  | -1.15 | 0.025144 | 0.999919 |
| <i>Myo15b</i>   | myosin XVB                                                                        | -1.15 | 0.013371 | 0.999919 |
| <i>Rbbp9</i>    | retinoblastoma binding protein 9                                                  | -1.15 | 0.024872 | 0.999919 |
| <i>St7</i>      | suppression of tumorigenicity 7                                                   | -1.15 | 0.035355 | 0.999919 |
| <i>Krt34</i>    | keratin 34                                                                        | -1.15 | 0.001007 | 0.999919 |
| <i>Rnaseh2a</i> | ribonuclease H2, large subunit                                                    | -1.14 | 0.017703 | 0.999919 |
| <i>Drd4</i>     | dopamine receptor D4                                                              | -1.14 | 0.038018 | 0.999919 |
| <i>Slc36a2</i>  | solute carrier family 36 (proton/amino acid symporter), member 2                  | -1.14 | 0.029107 | 0.999919 |
| <i>Actbl2</i>   | actin, beta-like 2                                                                | -1.13 | 0.00283  | 0.999919 |
| <i>Chst12</i>   | carbohydrate sulfotransferase 12                                                  | -1.13 | 0.021573 | 0.999919 |
| <i>Plac9b</i>   | placenta specific 9b                                                              | -1.13 | 0.01864  | 0.999919 |
| <i>Pard3b</i>   | par-3 family cell polarity regulator beta                                         | -1.12 | 0.029105 | 0.999919 |
| <i>Cnga1</i>    | cyclic nucleotide gated channel alpha 1                                           | -1.12 | 0.036728 | 0.999919 |
| <i>Exoc1</i>    | exocyst complex component 1                                                       | -1.1  | 0.041464 | 0.999919 |
| <i>Xrcc1</i>    | X-ray repair complementing defective repair in Chinese hamster cells 1            | -1.1  | 0.047262 | 0.999919 |
| <i>Sec62</i>    | SEC62 homolog ( <i>S. cerevisiae</i> )                                            | -1.09 | 0.004318 | 0.999919 |
| <i>Kif2b</i>    | kinesin family member 2B                                                          | -1.09 | 0.039659 | 0.999919 |
| <i>Ap1m2</i>    | adaptor protein complex AP-1, mu 2 subunit                                        | -1.09 | 0.045156 | 0.999919 |

---

**Table S12-** Gene set enrichment analysis by gene ontology of microarray data obtained from Ala92-Dio2 mice and Thr92-Dio2 mice in amygdala. Listed gene sets were significant at a nominal p-value <1%.

| Name of the Gene ontology (GO) gene sets enriched in Ala mice (Amygdala) | Size of gene sets | ES     | NES    | NOM p-val | FDR q-val |
|--------------------------------------------------------------------------|-------------------|--------|--------|-----------|-----------|
| GO_2_IRON_2_SULFUR_CLUSTER_BINDING                                       | 21                | 0.5956 | 1.8438 | 0.0001    | 0.417798  |
| GO_REGULATION_OF_SPINDLE_ORGANIZATION                                    | 19                | 0.523  | 1.8291 | 0.0001    | 0.259903  |
| GO_RIBOSOME_BINDING                                                      | 43                | 0.4778 | 1.747  | 0.0001    | 0.638125  |
| GO_PROTEASOME_COMPLEX                                                    | 75                | 0.3605 | 1.7375 | 0.0001    | 0.56275   |
| GO_U2_SNRNP                                                              | 17                | 0.5258 | 1.7311 | 0.0001    | 0.504011  |
| GO_VESICLE_COATING                                                       | 72                | 0.4785 | 1.7218 | 0.0001    | 0.49115   |
| GO_INTRAMOLECULAR_TRANSFERASE_ACTIVITY                                   | 26                | 0.5996 | 1.7002 | 0.0001    | 0.49272   |
| GO_VESICLE_TARGETING                                                     | 75                | 0.4542 | 1.6941 | 0.0001    | 0.428952  |
| GO_CLATHRIN_ADAPTOR_COMPLEX                                              | 27                | 0.4473 | 1.6771 | 0.0001    | 0.484221  |
| GO_LIPOPROTEIN_BIOSYNTHETIC_PROCESS                                      | 81                | 0.3793 | 1.6715 | 0.0001    | 0.475923  |
| GO_SPLICEOSOMAL_SNRNP_ASSEMBLY                                           | 34                | 0.4526 | 1.6696 | 0.0001    | 0.453664  |
| GO_POST_TRANSLATIONAL_PROTEIN_MODIFICATION                               | 28                | 0.5132 | 1.6669 | 0.0001    | 0.44665   |
| GO_NEGATIVE_REGULATION_OF_PHOSPHOPROTEIN_PHOSPHATASE_ACTIVITY            | 15                | 0.5536 | 1.6621 | 0.0001    | 0.437825  |
| GO_NEGATIVE_REGULATION_OF_TELOMERE_MAINTENANCE_VIA_TELOMERE_LENGTHENING  | 17                | 0.5069 | 1.6595 | 0.0001    | 0.420588  |
| GO_TRANSCRIPTION_ELONGATION_FROM_RNA_POLYMERASE_II_PROMOTER              | 72                | 0.3752 | 1.657  | 0.0001    | 0.408492  |
| GO_GOLGI_TO_ENDOSOME_TRANSPORT                                           | 16                | 0.515  | 1.6545 | 0.0001    | 0.398645  |
| GO_NEGATIVE_REGULATION_OF_TELOMERE_MAINTENANCE                           | 26                | 0.519  | 1.6515 | 0.0001    | 0.395867  |
| GO_SNRNA_METABOLIC_PROCESS                                               | 74                | 0.4056 | 1.6512 | 0.0001    | 0.378508  |
| GO_SIGNAL_SEQUENCE_BINDING                                               | 36                | 0.4625 | 1.6481 | 0.0001    | 0.378934  |
| GO_PROTEIN_N_TERMINUS_BINDING                                            | 100               | 0.3248 | 1.6135 | 0.0001    | 0.503611  |
| GO_GOLGI_STACK                                                           | 113               | 0.4005 | 1.6076 | 0.0001    | 0.517795  |
| GO_SINGLE_ORGANISM_MEMBRANE_BUDDING                                      | 71                | 0.4252 | 1.6069 | 0.0001    | 0.503229  |
| GO_NEGATIVE_REGULATION_OF_DNA_REPLICATION                                | 53                | 0.4289 | 1.6045 | 0.0001    | 0.493259  |
| GO_POSITIVE_REGULATION_OF_CANONICAL_WNT_SIGNALING_PATHWAY                | 116               | 0.3314 | 1.6028 | 0.0001    | 0.469894  |
| GO_SMALL_NUCLEOLAR_RIBONUCLEOPROTEIN_COMPLEX                             | 18                | 0.5115 | 1.6023 | 0.0001    | 0.456322  |
| GO_GOLGI_CISTERNA                                                        | 83                | 0.4017 | 1.5989 | 0.0001    | 0.460914  |
| GO_RIBONUCLEOPROTEIN_COMPLEX_BINDING                                     | 90                | 0.4124 | 1.5975 | 0.0001    | 0.453378  |
| GO_RESPONSE_TO_MANGANESE_ION                                             | 17                | 0.5849 | 1.5879 | 0.0001    | 0.458725  |

|                                                                                                   |     |        |        |        |          |
|---------------------------------------------------------------------------------------------------|-----|--------|--------|--------|----------|
| GO_ORGANELLAR_LARGE_RIBOSOMAL_SUBUNIT                                                             | 30  | 0.5398 | 1.5867 | 0.0001 | 0.442218 |
| GO_POSITIVE_REGULATION_OF_DNA_REPAIR                                                              | 34  | 0.461  | 1.5712 | 0.0001 | 0.476845 |
| GO_HISTONE_MRNA_METABOLIC_PROCESS                                                                 | 28  | 0.5093 | 1.5608 | 0.0001 | 0.496273 |
| GO_DNA_TEMPLATED_TRANSCRIPTION_ELONGATION                                                         | 87  | 0.3441 | 1.5584 | 0.0001 | 0.500629 |
| GO_VESICLE_DOCKING                                                                                | 52  | 0.4346 | 1.5577 | 0.0001 | 0.49412  |
| GO_MRNA_CLEAVAGE_FACTOR_COMPLEX                                                                   | 17  | 0.5197 | 1.5481 | 0.0001 | 0.517586 |
| GO_REGULATION_OF_PROTEIN_UBIQUITINATION_INVOLVED_IN_UBIQUITIN_DEPENDENT_PROTEIN_CATABOLIC_PROCESS | 102 | 0.3149 | 1.5477 | 0.0001 | 0.510625 |
| GO_CLATHRIN_COAT                                                                                  | 45  | 0.342  | 1.5381 | 0.0001 | 0.533793 |
| GO_NEGATIVE_REGULATION_OF_DENDRITE_DEVELOPMENT                                                    | 26  | 0.4969 | 1.5364 | 0.0001 | 0.53622  |
| GO_NAD_BINDING                                                                                    | 53  | 0.4095 | 1.5355 | 0.0001 | 0.531756 |
| GO_RESPONSE_TO_SALT                                                                               | 16  | 0.5411 | 1.5355 | 0.0001 | 0.522421 |
| GO_POSITIVE_REGULATION_OF_CELLULAR_PROTEIN_CATABOLIC_PROCESS                                      | 189 | 0.2997 | 1.5333 | 0.0001 | 0.524679 |
| GO_NUCLEOTIDE_SUGAR_BIOSYNTHETIC_PROCESS                                                          | 19  | 0.5072 | 1.5321 | 0.0001 | 0.522885 |
| GO_POSITIVE_REGULATION_OF_G1_S_TRANSITION_OF_MITOTIC_CELL_CYCLE                                   | 24  | 0.5234 | 1.5278 | 0.0001 | 0.530312 |
| GO_NUCLEOBASE_CONTAINING_SMALL_MOLECULE_INTERCONVERSION                                           | 21  | 0.4685 | 1.5234 | 0.0001 | 0.537596 |
| GO_REGULATION_OF_COFACTOR_METABOLIC_PROCESS                                                       | 48  | 0.3923 | 1.5204 | 0.0001 | 0.535727 |
| GO_POST_GOLGI_VESICLE_MEDIATED_TRANSPORT                                                          | 77  | 0.3447 | 1.5145 | 0.0001 | 0.539793 |
| GO_REGULATION_OF_CELLULAR_PROTEIN_CATABOLIC_PROCESS                                               | 267 | 0.2934 | 1.514  | 0.0001 | 0.535291 |
| GO_CELLULAR_RESPONSE_TO_VITAMIN                                                                   | 26  | 0.458  | 1.4937 | 0.0001 | 0.588231 |
| GO_DNA_DOUBLE_STRAND_BREAK_PROCESSING                                                             | 18  | 0.5492 | 1.4927 | 0.0001 | 0.577932 |
| GO_POSITIVE_REGULATION_OF_CELL_CYCLE_G1_S_PHASE_TRANSITION                                        | 28  | 0.502  | 1.4873 | 0.0001 | 0.59201  |
| GO_POSITIVE_REGULATION_OF_PROTEIN_CATABOLIC_PROCESS                                               | 255 | 0.2958 | 1.4866 | 0.0001 | 0.581244 |
| GO_MEMBRANE_DOCKING                                                                               | 63  | 0.39   | 1.4811 | 0.0001 | 0.58794  |
| GO_PHOSPHATE_ION_TRANSPORT                                                                        | 18  | 0.4735 | 1.4758 | 0.0001 | 0.579455 |
| GO_NEGATIVE_REGULATION_OF_NEURON_DEATH                                                            | 163 | 0.3177 | 1.4747 | 0.0001 | 0.577862 |
| GO_NEGATIVE_REGULATION_OF_HISTONE_ACETYLATION                                                     | 15  | 0.4141 | 1.4639 | 0.0001 | 0.608734 |
| GO_TELOMERE_CAPPING                                                                               | 15  | 0.5149 | 1.4597 | 0.0001 | 0.596819 |
| GO_CYTOPLASMIC_MRNA_PROCESSING_BODY                                                               | 59  | 0.2934 | 1.4556 | 0.0001 | 0.597779 |
| GO_UBIQUITIN_LIKE_PROTEIN_BINDING                                                                 | 113 | 0.2831 | 1.4509 | 0.0001 | 0.596518 |



|                                                                                        |     |        |        |        |          |
|----------------------------------------------------------------------------------------|-----|--------|--------|--------|----------|
| GO_VESICLE_DOCKING_INVOLVED_IN_EXOCYTOSIS                                              | 34  | 0.4043 | 1.4507 | 0.0001 | 0.592201 |
| GO_SINGLE_STRANDED_DNA_BINDING                                                         | 75  | 0.3079 | 1.4499 | 0.0001 | 0.586431 |
| GO_REGULATION_OF_PROTEIN_CATABOLIC_PROCESS                                             | 380 | 0.2742 | 1.4316 | 0.0001 | 0.609399 |
| GO_MACROAUTOPHAGY                                                                      | 242 | 0.3012 | 1.4302 | 0.0001 | 0.605898 |
| GO_POSITIVE_REGULATION_OF_PROTEIN_MODIFICATION_BY_SMALL_PROTEIN_CONJUGATION_OR_REMOVAL | 189 | 0.2902 | 1.4298 | 0.0001 | 0.603337 |
| GO_REGULATION_OF_RNA_STABILITY                                                         | 134 | 0.2668 | 1.4276 | 0.0001 | 0.604496 |
| GO_LIPOPROTEIN_METABOLIC_PROCESS                                                       | 111 | 0.2915 | 1.4254 | 0.0001 | 0.610814 |
| GO_K63_LINKED_POLYUBIQUITIN_BINDING                                                    | 16  | 0.4295 | 1.413  | 0.0001 | 0.617385 |
| GO_RECOMBINATIONAL_REPAIR                                                              | 68  | 0.363  | 1.3975 | 0.0001 | 0.643519 |
| GO_REGULATION_OF_PROTEIN_MODIFICATION_BY_SMALL_PROTEIN_CONJUGATION_OR_REMOVAL          | 269 | 0.2747 | 1.3794 | 0.0001 | 0.647621 |
| GO_NEGATIVE_REGULATION_OF_POTASSIUM_ION_TRANSMEMBRANE_TRANSPORT                        | 20  | 0.4254 | 1.3564 | 0.0001 | 0.664034 |
| GO_RESPONSE_TO_IRON_ION                                                                | 35  | 0.4079 | 1.3545 | 0.0001 | 0.667409 |
| GO_DNA_TEMPLATED_TRANSCRIPTION_INITIATION                                              | 183 | 0.2726 | 1.3384 | 0.0001 | 0.695869 |
| GO_NEURON_DEATH                                                                        | 45  | 0.3052 | 1.3004 | 0.0001 | 0.734823 |
| GO_AUTOPHAGY                                                                           | 343 | 0.2437 | 1.2762 | 0.0001 | 0.74166  |
| GO_FC_RECEPTOR_SIGNALING_PATHWAY                                                       | 181 | 0.2034 | 1.2668 | 0.0001 | 0.75463  |
| GO_NADP_BINDING                                                                        | 40  | 0.3356 | 1.2624 | 0.0001 | 0.758898 |
| GO_DNA_RECOMBINATION                                                                   | 188 | 0.2909 | 1.245  | 0.0001 | 0.755322 |
| GO_ORGANOPHOSPHATE_BIOSYNTHETIC_PROCESS                                                | 421 | 0.2222 | 1.1697 | 0.0001 | 0.815954 |

---

**Table S13-** Gene set enrichment analysis by gene ontology of microarray data obtained from Ala92-Dio2 mice and Thr92-Dio2 mice in amygdala. Listed gene sets were significant at a nominal p-value <1%.

| Name of the Gene ontology (GO) gene sets enriched in Thr mice (Amygdala) | Size of gene sets | ES       | NES      | NOM p-val | FDR q-val |
|--------------------------------------------------------------------------|-------------------|----------|----------|-----------|-----------|
| GO_RESPIRATORY_GASEOUS_EXCHANGE                                          | 46                | -0.46311 | -1.82442 | 0.0001    | 0.54823   |
| GO_BETA_CATENIN_TCF_COMPLEX_ASSEMBLY                                     | 29                | -0.44371 | -1.80358 | 0.0001    | 0.49428   |
| GO_ACTIVATION_OF_PHOSPHOLIPASE_C_ACTIVITY                                | 26                | -0.69051 | -1.78054 | 0.0001    | 0.44927   |
| GO_REGULATION_OF_RESPIRATORY_SYSTEM_PROCESS                              | 15                | -0.5949  | -1.77756 | 0.0001    | 0.35429   |
| GO_REGULATION_OF_PHOSPHOLIPASE_C_ACTIVITY                                | 38                | -0.57471 | -1.71792 | 0.0001    | 0.57195   |
| GO_CHRONIC_INFLAMMATORY_RESPONSE                                         | 15                | -0.65652 | -1.69726 | 0.0001    | 0.65335   |
| GO_MULTI_ORGANISM_BEHAVIOR                                               | 70                | -0.44019 | -1.67432 | 0.0001    | 0.80225   |
| GO_POSITIVE_REGULATION_OF_BLOOD_PRESSURE                                 | 34                | -0.56175 | -1.66033 | 0.0001    | 0.85589   |
| GO_PROTEIN_BINDING_INVOLVED_IN_CELL_ADHESION                             | 16                | -0.71357 | -1.65895 | 0.0001    | 0.77971   |
| GO_MYOSIN_FILAMENT                                                       | 22                | -0.60874 | -1.6199  | 0.0001    | 1         |
| GO_REGULATION_OF_SYSTEMIC_ARTERIAL_BLOOD_PRESSURE_BY_RENIN_ANGIOTENSIN   | 22                | -0.57434 | -1.61582 | 0.0001    | 1         |
| GO_PHAGOCYTOSIS_ENGULFMENT                                               | 15                | -0.57164 | -1.59811 | 0.0001    | 1         |
| GO_NEGATIVE_REGULATION_OF_INTERFERON_GAMMA_PRODUCTION                    | 28                | -0.51271 | -1.59522 | 0.0001    | 1         |
| GO_POSITIVE_REGULATION_OF_LIPASE_ACTIVITY                                | 64                | -0.47135 | -1.59295 | 0.0001    | 1         |
| GO_RESPONSE_TO_STIMULUS_INVOLVED_IN_REGULATION_OF_MUSCLE_ADAPTATION      | 15                | -0.60144 | -1.59032 | 0.0001    | 1         |
| GO_ACYLGLYCEROL_HOMEOSTASIS                                              | 25                | -0.56965 | -1.58681 | 0.0001    | 0.96301   |
| GO_RNA_POLYMERASE_II_TRANSCRIPTION_FACTOR_BINDING                        | 101               | -0.36721 | -1.56862 | 0.0001    | 1         |
| GO_NEGATIVE_REGULATION_OF_GLIOGENESIS                                    | 36                | -0.45642 | -1.56826 | 0.0001    | 1         |
| GO_POSITIVE_REGULATION_OF_PHOSPHOLIPASE_ACTIVITY                         | 51                | -0.45927 | -1.56114 | 0.0001    | 1         |
| GO_SERTOLI_CELL_DIFFERENTIATION                                          | 18                | -0.50333 | -1.55623 | 0.0001    | 1         |
| GO_POSITIVE_REGULATION_OF_VASODILATION                                   | 31                | -0.52652 | -1.5498  | 0.0001    | 1         |
| GO_NARROW_PORE_CHANNEL_ACTIVITY                                          | 16                | -0.53539 | -1.54891 | 0.0001    | 1         |

|                                                                                 |     |          |          |        |         |
|---------------------------------------------------------------------------------|-----|----------|----------|--------|---------|
| GO_POSITIVE_REGULATION_OF_TRIGLYCERIDE_METABOLIC_PROCESS                        | 19  | -0.63296 | -1.54703 | 0.0001 | 1       |
| GO_REGULATION_OF_SYSTEMIC_ARTERIAL_BLOOD_PRESSURE_BY_HORMONE                    | 34  | -0.52584 | -1.54432 | 0.0001 | 1       |
| GO_REGULATION_OF_CYTOKINE_PRODUCTION_INVOLVED_IN_IMMUNE_RESPONSE                | 50  | -0.48506 | -1.54214 | 0.0001 | 1       |
| GO_REGULATION_OF_CORTICOSTEROID_HORMONE_SECRETION                               | 15  | -0.68808 | -1.53902 | 0.0001 | 1       |
| GO_REGULATION_OF_RYANODINE_SENSITIVE_CALCIIUM_RELEASE_CHANNEL_ACTIVITY          | 25  | -0.42082 | -1.53531 | 0.0001 | 0.97259 |
| GO_NEUROPEPTIDE_RECEPTOR_ACTIVITY                                               | 40  | -0.57159 | -1.53304 | 0.0001 | 0.94161 |
| GO_ATRIAL_SEPTUM_DEVELOPMENT                                                    | 18  | -0.56796 | -1.52999 | 0.0001 | 0.91764 |
| GO_STABILIZATION_OF_MEMBRANE_POTENTIAL                                          | 15  | -0.55681 | -1.52574 | 0.0001 | 0.90705 |
| GO_SERTOLI_CELL_DEVELOPMENT                                                     | 15  | -0.5492  | -1.51716 | 0.0001 | 0.96011 |
| GO_CARDIAC_ATRIUM_DEVELOPMENT                                                   | 30  | -0.48888 | -1.51332 | 0.0001 | 0.91015 |
| GO_POSITIVE_REGULATION_OF_ACTIVATED_T_CELL_PROLIFERATION                        | 24  | -0.573   | -1.51223 | 0.0001 | 0.90282 |
| GO_POSITIVE_REGULATION_OF_CYTOKINE_PRODUCTION_INVOLVED_IN_IMMUNE_RESPONSE       | 28  | -0.52655 | -1.51104 | 0.0001 | 0.89263 |
| GO_REGULATION_OF_ENDOCRINE_PROCESS                                              | 46  | -0.49804 | -1.51056 | 0.0001 | 0.87868 |
| GO_NEPHRON_TUBULE_FORMATION                                                     | 18  | -0.60778 | -1.50823 | 0.0001 | 0.88222 |
| GO_NEGATIVE_REGULATION_OF_CYTOKINE_PRODUCTION_INVOLVED_IN_IMMUNE_RESPONSE       | 17  | -0.60703 | -1.50802 | 0.0001 | 0.86654 |
| GO_REGULATION_OF_SYSTEMIC_ARTERIAL_BLOOD_PRESSURE                               | 78  | -0.41426 | -1.50669 | 0.0001 | 0.86153 |
| GO_NEGATIVE_REGULATION_OF_AXON_GUIDANCE                                         | 27  | -0.52863 | -1.5048  | 0.0001 | 0.86075 |
| GO_FEEDING_BEHAVIOR                                                             | 86  | -0.47803 | -1.49831 | 0.0001 | 0.8709  |
| GO_REGULATION_OF_BLOOD_PRESSURE                                                 | 158 | -0.37162 | -1.49788 | 0.0001 | 0.85891 |
| GO_REGULATION_OF_PHOSPHOLIPASE_ACTIVITY                                         | 61  | -0.39984 | -1.48785 | 0.0001 | 0.85654 |
| GO_NITRIC_OXIDE_SYNTHASE_BINDING                                                | 19  | -0.49447 | -1.48619 | 0.0001 | 0.81976 |
| GO_RESPONSE_TO_HEAT                                                             | 80  | -0.37511 | -1.48267 | 0.0001 | 0.81188 |
| GO_AMPA_Glutamate_Receptor_Complex                                              | 27  | -0.45041 | -1.47318 | 0.0001 | 0.8111  |
| GO_OSTEOBLAST_DEVELOPMENT                                                       | 18  | -0.50507 | -1.47306 | 0.0001 | 0.80146 |
| GO_REGULATION_OF_SYSTEMIC_ARTERIAL_BLOOD_PRESSURE_MEDIATED_BY_A_CHEMICAL_SIGNAL | 44  | -0.46405 | -1.47025 | 0.0001 | 0.80328 |

|                                                               |     |          |          |        |         |
|---------------------------------------------------------------|-----|----------|----------|--------|---------|
| GO_LENS_DEVELOPMENT_IN_CAMERA_TYPE_EYE                        | 65  | -0.39713 | -1.46851 | 0.0001 | 0.80698 |
| GO_REGULATION_OF_STEROID_HORMONE_SECRETION                    | 20  | -0.57736 | -1.4648  | 0.0001 | 0.8101  |
| GO_TRANSMITTER_GATED_CHANNEL_ACTIVITY                         | 26  | -0.49171 | -1.46194 | 0.0001 | 0.81223 |
| GO_CELL_FATE_DETERMINATION                                    | 43  | -0.46967 | -1.46023 | 0.0001 | 0.8145  |
| GO_REGULATION_OF_BMP_SIGNALING_PATHWAY                        | 76  | -0.38995 | -1.45179 | 0.0001 | 0.85489 |
| GO_REGULATION_OF_VASODILATION                                 | 46  | -0.44594 | -1.44908 | 0.0001 | 0.85355 |
| GO_POSITIVE_REGULATION_OF_RECEPTOR_INTERNALIZATION            | 23  | -0.50736 | -1.44334 | 0.0001 | 0.86138 |
| GO_AXONEMAL_DYNEIN_COMPLEX_ASSEMBLY                           | 16  | -0.48951 | -1.44296 | 0.0001 | 0.85463 |
| GO_PHOTORECEPTOR_CELL_DEVELOPMENT                             | 38  | -0.43549 | -1.44022 | 0.0001 | 0.85491 |
| GO_REGULATION_OF_ACTIVATED_T_CELL_PROLIFERATION               | 34  | -0.46315 | -1.44012 | 0.0001 | 0.84692 |
| GO_POSITIVE_REGULATION_OF_EPIDERMAL_CELL_DIFFERENTIATION      | 19  | -0.45106 | -1.43996 | 0.0001 | 0.83936 |
| GO_CELL_FATE_COMMITMENT                                       | 223 | -0.3621  | -1.43848 | 0.0001 | 0.83153 |
| GO_NEGATIVE_REGULATION_OF_NUCLEOSIDE_METABOLIC_PROCESS        | 18  | -0.46271 | -1.42369 | 0.0001 | 0.8686  |
| GO_POSITIVE_REGULATION_OF_ERBB_SIGNALING_PATHWAY              | 33  | -0.4735  | -1.42364 | 0.0001 | 0.86131 |
| GO_EXTRACELLULAR_LIGAND_GATED_ION_CHANNEL_ACTIVITY            | 70  | -0.4252  | -1.42315 | 0.0001 | 0.85779 |
| GO_RESPONSE_TO_ZINC_ION                                       | 45  | -0.36784 | -1.4228  | 0.0001 | 0.84505 |
| GO_REGULATION_OF_LIPASE_ACTIVITY                              | 80  | -0.39836 | -1.41867 | 0.0001 | 0.84374 |
| GO_MIDBODY                                                    | 124 | -0.30645 | -1.41867 | 0.0001 | 0.83667 |
| GO_REGULATION_OF_EPIDERMAL_CELL_DIFFERENTIATION               | 42  | -0.37482 | -1.41481 | 0.0001 | 0.82718 |
| GO_EXCITATORY_EXTRACELLULAR_LIGAND_GATED_ION_CHANNEL_ACTIVITY | 51  | -0.43366 | -1.41395 | 0.0001 | 0.82655 |
| GO_REGULATION_OF_EXTENT_OF_CELL_GROWTH                        | 96  | -0.36798 | -1.41148 | 0.0001 | 0.81784 |
| GO_KIDNEY_MORPHOGENESIS                                       | 81  | -0.40524 | -1.40215 | 0.0001 | 0.84098 |
| GO_PROTEIN_DNA_COMPLEX                                        | 105 | -0.31311 | -1.40123 | 0.0001 | 0.82291 |
| GO_NEURAL_CREST_CELL_MIGRATION                                | 51  | -0.4501  | -1.39205 | 0.0001 | 0.79782 |
| GO_MESONEPHROS_DEVELOPMENT                                    | 89  | -0.42794 | -1.38859 | 0.0001 | 0.78325 |
| GO_SH3_DOMAIN_BINDING                                         | 112 | -0.26524 | -1.38328 | 0.0001 | 0.78277 |
| GO_CELL_CYCLE_ARREST                                          | 137 | -0.27911 | -1.3737  | 0.0001 | 0.79861 |
| GO_SCAFFOLD_PROTEIN_BINDING                                   | 43  | -0.35137 | -1.36759 | 0.0001 | 0.79727 |
| GO_RESPONSE_TO_ALKALOID                                       | 132 | -0.34141 | -1.36751 | 0.0001 | 0.79334 |
| GO_MUSCLE_CONTRACTION                                         | 229 | -0.3322  | -1.36248 | 0.0001 | 0.80586 |

|                                                                                                |     |          |          |        |         |
|------------------------------------------------------------------------------------------------|-----|----------|----------|--------|---------|
| GO_REGULATION_OF_RECEPTOR_ACTIVITY                                                             | 113 | -0.29833 | -1.35564 | 0.0001 | 0.80325 |
| GO_NEGATIVE_REGULATION_OF_CHEMOTAXIS                                                           | 49  | -0.41585 | -1.35203 | 0.0001 | 0.81397 |
| GO_DNA_PACKAGING_COMPLEX                                                                       | 40  | -0.33831 | -1.34783 | 0.0001 | 0.78749 |
| GO_REGULATION_OF_B_CELL_DIFFERENTIATION                                                        | 22  | -0.45428 | -1.34687 | 0.0001 | 0.78534 |
| GO_DIGESTIVE_SYSTEM_DEVELOPMENT                                                                | 144 | -0.34157 | -1.34315 | 0.0001 | 0.78866 |
| GO_PROTEIN_SECRETION                                                                           | 103 | -0.30299 | -1.3402  | 0.0001 | 0.79512 |
| GO_CLATHRIN_COATED_VESICLE_MEMBRANE                                                            | 67  | -0.28278 | -1.33656 | 0.0001 | 0.79675 |
| GO_MUSCLE_SYSTEM_PROCESS                                                                       | 276 | -0.322   | -1.33537 | 0.0001 | 0.79679 |
| GO_REGULATION_OF_CYTOSOLIC_CALCIIUM_I<br>ON_CONCENTRATION                                      | 194 | -0.34554 | -1.32992 | 0.0001 | 0.79832 |
| GO_REGULATION_OF_VASOCONSTRICTION                                                              | 65  | -0.37408 | -1.31382 | 0.0001 | 0.81856 |
| GO_POSITIVE_REGULATION_OF_SECRETION                                                            | 343 | -0.2889  | -1.30661 | 0.0001 | 0.82845 |
| GO_HYDROLASE_ACTIVITY_ACTING_ON_CARBO<br>N_NITROGEN_BUT_NOT_PEPTIDE_BONDS_I<br>N_LINEAR_AMIDES | 79  | -0.27023 | -1.30628 | 0.0001 | 0.82719 |
| GO_REGULATION_OF_CHONDROCYTE_DIFFER<br>ENTIATION                                               | 45  | -0.35467 | -1.28998 | 0.0001 | 0.81424 |
| GO_REGULATION_OF_CYCLIC_NUCLEOTIDE_<br>METABOLIC_PROCESS                                       | 144 | -0.34086 | -1.27574 | 0.0001 | 0.82383 |
| GO_CIRCULATORY_SYSTEM_PROCESS                                                                  | 346 | -0.2949  | -1.26212 | 0.0001 | 0.84458 |
| GO_HEART_PROCESS                                                                               | 84  | -0.29859 | -1.24703 | 0.0001 | 0.85588 |

**Table S14-** Gene set enrichment analysis by gene ontology of microarray data obtained from Ala92-Dio2 mice and Thr92-Dio2 mice in cerebellum. Listed gene sets were significant at a nominal p-value <1% or FDR < 25% .

| Name of the Gene ontology (GO) gene sets enriched in Ala mice (Cerebellum) | Size of gene sets | ES   | NES  | NOM p-val | FDR q-val |
|----------------------------------------------------------------------------|-------------------|------|------|-----------|-----------|
| GO_U2_SNRNP                                                                | 17                | 0.63 | 1.98 | 0.0001    | 0.047     |
| GO_MULTI_ORGANISM_ORGANELLE_ORGANIZATION                                   | 22                | 0.46 | 1.88 | 0.0001    | 0.2083    |
| GO_U2_TYPE_SPLICEOSOMAL_COMPLEX                                            | 27                | 0.58 | 1.88 | 0.0001    | 0.1426    |
| GO_MULTIVESICULAR_BODY_ORGANIZATION                                        | 29                | 0.46 | 1.86 | 0.0001    | 0.1378    |
| GO_CAJAL_BODY                                                              | 46                | 0.48 | 1.84 | 0.0001    | 0.1457    |
| GO_PRESPLICEOSOME                                                          | 20                | 0.54 | 1.83 | 0.0001    | 0.1386    |
| GO_DRUG_METABOLIC_PROCESS                                                  | 19                | 0.63 | 1.82 | 0.0001    | 0.142     |
| GO_ESCRT_COMPLEX                                                           | 23                | 0.47 | 1.82 | 0.0001    | 0.1348    |
| GO_NUCLEOTIDE_EXCISION_REPAIR_DNA_DAMAGE_RECOGNITION                       | 23                | 0.59 | 1.81 | 0.0001    | 0.1278    |
| GO_PROTEIN_TARGETING_TO_MEMBRANE                                           | 148               | 0.52 | 1.79 | 0.0465    | 0.126     |
| GO_CYTOSOLIC_LARGE_RIBOSOMAL_SUBUNIT                                       | 53                | 0.69 | 1.78 | 0.0455    | 0.1266    |
| GO_PROTEIN_REFOLDING                                                       | 19                | 0.58 | 1.78 | 0.0001    | 0.117     |
| GO_MANNOSE_BINDING                                                         | 15                | 0.62 | 1.78 | 0.0001    | 0.1106    |
| GO_NUCLEAR_TRANSCRIBED_MRNA_CATABOLIC_PROCESS_NONSENSE_MEDIATED_DECAY      | 111               | 0.58 | 1.78 | 0.0457    | 0.111     |
| GO_ESTABLISHMENT_OF_PROTEIN_LOCALIZATION_TO_ENDOPLASMIC_RETICULUM          | 97                | 0.63 | 1.78 | 0.0465    | 0.1059    |
| GO_MITOCHONDRIAL_GENOME_MAINTENANCE                                        | 19                | 0.59 | 1.78 | 0.0001    | 0.101     |
| GO_TRANSLATIONAL_INITIATION                                                | 134               | 0.58 | 1.78 | 0.0706    | 0.0957    |
| GO_CYTOSOLIC_RIBOSOME                                                      | 99                | 0.63 | 1.77 | 0.0468    | 0.0955    |
| GO_CATALYTIC_STEP_2_SPLICEOSOME                                            | 81                | 0.42 | 1.76 | 0.0302    | 0.1046    |
| GO_COPI_COATED_VESICLE                                                     | 20                | 0.57 | 1.75 | 0.0001    | 0.1203    |
| GO_RNA_CATABOLIC_PROCESS                                                   | 207               | 0.42 | 1.75 | 0.0001    | 0.1222    |
| GO_PROTEIN_LOCALIZATION_TO_ENDOPLASMIC_RETICULUM                           | 116               | 0.56 | 1.74 | 0.0468    | 0.1235    |
| GO_INTERSTRAND_CROSS_LINK_REPAIR                                           | 36                | 0.55 | 1.72 | 0.0001    | 0.1543    |
| GO_NOTCH_BINDING                                                           | 16                | 0.57 | 1.72 | 0.0001    | 0.1483    |
| GO_SPLICEOSOMAL_COMPLEX_ASSEMBLY                                           | 49                | 0.38 | 1.71 | 0.0001    | 0.162     |
| GO_ACTIN_NUCLEATION                                                        | 20                | 0.5  | 1.71 | 0.0001    | 0.1588    |
| GO_SPLICEOSOMAL_COMPLEX                                                    | 155               | 0.36 | 1.71 | 0.0001    | 0.1558    |

|                                                            |     |      |      |        |        |
|------------------------------------------------------------|-----|------|------|--------|--------|
| GO_BETA_CATENIN_DESTRUCTION_COMPLEX_DISASSEMBLY            | 21  | 0.56 | 1.7  | 0.0001 | 0.1564 |
| GO_CYTOSOLIC_SMALL_RIBOSOMAL_SUBUNIT                       | 38  | 0.65 | 1.7  | 0.0472 | 0.1526 |
| GO_THYROID_HORMONE_RECEPTOR_BINDING                        | 29  | 0.48 | 1.7  | 0.0001 | 0.1485 |
| GO_MULTI_ORGANISM_METABOLIC_PROCESS                        | 127 | 0.5  | 1.68 | 0.0692 | 0.1825 |
| GO_FILAMENTOUS_ACTIN                                       | 19  | 0.63 | 1.68 | 0.0248 | 0.1772 |
| GO_H4_HISTONE_ACETYLTRANSFERASE_COMPLEX                    | 17  | 0.49 | 1.68 | 0.0239 | 0.182  |
| GO_GLOBAL_GENOME_NUCLEOTIDE_EXCISION_REPAIR                | 31  | 0.44 | 1.68 | 0.0001 | 0.1815 |
| GO_NUCLEOBASE_BIOSYNTHETIC_PROCESSES                       | 16  | 0.64 | 1.68 | 0.0339 | 0.18   |
| GO_COATED_MEMBRANE                                         | 78  | 0.32 | 1.67 | 0.0001 | 0.1901 |
| GO_RIBOSOMAL_SUBUNIT                                       | 146 | 0.53 | 1.67 | 0.0704 | 0.1909 |
| GO_POSITIVE_REGULATION_OF_MRNA_PROCESSING                  | 30  | 0.4  | 1.66 | 0.0001 | 0.1987 |
| GO_NUCLEOTIDE_EXCISION_REPAIR_PREINCISION_COMPLEX_ASSEMBLY | 28  | 0.5  | 1.66 | 0.0341 | 0.1985 |
| GO_RIBONUCLEOPROTEIN_COMPLEX_BIOGENESIS                    | 405 | 0.36 | 1.65 | 0.0001 | 0.2022 |
| GO_SMALL_RIBOSOMAL_SUBUNIT                                 | 61  | 0.57 | 1.65 | 0.071  | 0.2041 |
| GO_SINGLE_STRANDED_DNA_BINDING                             | 75  | 0.36 | 1.64 | 0.0001 | 0.2221 |
| GO_U5_SNRNP                                                | 15  | 0.57 | 1.63 | 0.0001 | 0.2292 |
| GO_U1_SNRNP                                                | 16  | 0.58 | 1.63 | 0.0001 | 0.2257 |
| GO_SMALL_NUCLEAR_RIBONUCLEOPROTEIN_COMPLEX                 | 57  | 0.39 | 1.63 | 0.0001 | 0.2234 |
| GO_MULTI_ORGANISM_MEMBRANE_ORGANIZATION                    | 29  | 0.41 | 1.63 | 0.0001 | 0.2342 |
| GO_LARGE_RIBOSOMAL_SUBUNIT                                 | 85  | 0.52 | 1.63 | 0.0696 | 0.2331 |
| GO_UBIQUITIN_LIKE_PROTEIN_CONJUGATING_ENZYME_ACTIVITY      | 28  | 0.44 | 1.62 | 0.0001 | 0.2414 |
| GO_RRNA_METABOLIC_PROCESS                                  | 239 | 0.41 | 1.62 | 0.0468 | 0.2473 |
| GO_RIBOSOME_BIOGENESIS                                     | 287 | 0.38 | 1.61 | 0.0001 | 0.2539 |
| GO_COMPLEMENT_BINDING                                      | 16  | 0.61 | 1.6  | 0.0001 | 0.2876 |
| GO_PROTEIN_K63_LINKED_UBIQUITINATION                       | 33  | 0.38 | 1.6  | 0.0001 | 0.2914 |
| GO_MLL1_2_COMPLEX                                          | 25  | 0.41 | 1.58 | 0.0001 | 0.3268 |
| GO_BASAL_LAMINA                                            | 20  | 0.49 | 1.58 | 0.0001 | 0.3227 |
| GO_SYNAPSE_ASSEMBLY                                        | 55  | 0.38 | 1.57 | 0.0001 | 0.3373 |
| GO_N_TERMINAL_PROTEIN_AMINO_ACID_MODIFICATION              | 23  | 0.46 | 1.56 | 0.0001 | 0.3565 |

|                                                                         |     |      |      |        |        |
|-------------------------------------------------------------------------|-----|------|------|--------|--------|
| GO_NEGATIVE_REGULATION_OF_TELOMERE_MAINTENANCE_VIA_TELOMERE_LENGTHENING | 17  | 0.46 | 1.56 | 0.0001 | 0.3543 |
| GO_NUCLEOID                                                             | 37  | 0.38 | 1.55 | 0.0001 | 0.3914 |
| GO_NEGATIVE_REGULATION_OF_TELOMERE_MAINTENANCE                          | 26  | 0.38 | 1.55 | 0.0001 | 0.3871 |
| GO_EMBRYONIC_FORELIMB_MORPHOGENESIS                                     | 32  | 0.54 | 1.54 | 0.0001 | 0.4177 |
| GO_ACETYLTRANSFERASE_COMPLEX                                            | 82  | 0.35 | 1.53 | 0.0001 | 0.4164 |
| GO_POSTREPLICATION_REPAIR                                               | 49  | 0.35 | 1.53 | 0.0001 | 0.4015 |
| GO_REGULATION_OF_TELOMERE_MAINTENANCE_VIA_TELOMERE_LENGTHENING          | 48  | 0.37 | 1.53 | 0.0001 | 0.4137 |
| GO_NUCLEAR_REPLICATION_FORK                                             | 37  | 0.41 | 1.53 | 0.0001 | 0.3987 |
| GO_CEREBELLAR_PURKINJE_CELL_LAYER_DEVELOPMENT                           | 23  | 0.45 | 1.53 | 0.0001 | 0.3992 |
| GO_POSITIVE_REGULATION_OF_VIRAL_PROCESS                                 | 82  | 0.33 | 1.52 | 0.0001 | 0.3965 |
| GO_NEGATIVE_REGULATION_OF_CYCLIN_DEPENDENT_PROTEIN_KINASE_ACTIVITY      | 31  | 0.39 | 1.52 | 0.0001 | 0.3919 |
| GO_DNA_DAMAGE_RESPONSE_DETECTION_OF_DNA_DAMAGE                          | 35  | 0.45 | 1.52 | 0.0001 | 0.4102 |
| GO_DNA_GEOMETRIC_CHANGE                                                 | 75  | 0.38 | 1.51 | 0.0001 | 0.4326 |
| GO_CELL_SUBSTRATE_JUNCTION                                              | 384 | 0.32 | 1.5  | 0.0001 | 0.4338 |
| GO_ACTIN_FILAMENT                                                       | 67  | 0.39 | 1.49 | 0.0001 | 0.4627 |
| GO_RETINA_MORPHOGENESIS_IN_CAMERA_TYPE_EYE                              | 45  | 0.41 | 1.49 | 0.0001 | 0.4604 |
| GO_REGULATION_OF_PROTEIN_ACTIVATION_CASCADE                             | 29  | 0.46 | 1.49 | 0.0001 | 0.4581 |
| GO_CADHERIN_BINDING                                                     | 28  | 0.49 | 1.48 | 0.0001 | 0.4528 |
| GO_ANCHORING_JUNCTION                                                   | 473 | 0.3  | 1.47 | 0.0001 | 0.4824 |
| GO_TRNA_SPECIFIC_RIBONUCLEASE_ACTIVITY                                  | 16  | 0.53 | 1.45 | 0.0001 | 0.5138 |
| GO_HISTONE_METHYLTRANSFERASE_COMPLEX                                    | 63  | 0.31 | 1.45 | 0.0001 | 0.5266 |
| GO_NONRIBOSOMAL_PEPTIDE_BIOSYNTHETIC_PROCESS                            | 15  | 0.48 | 1.44 | 0.0001 | 0.5319 |
| GO_PROTEASOMAL_PROTEIN_CATABOLIC_PROCESS                                | 262 | 0.25 | 1.43 | 0.0001 | 0.5403 |
| GO_REGULATION_OF_TELOMERASE_ACTIVITY                                    | 40  | 0.35 | 1.41 | 0.0001 | 0.5693 |
| GO_REPLISOME                                                            | 27  | 0.48 | 1.4  | 0.0001 | 0.5747 |
| GO_REGULATION_OF_TELOMERE_MAINTENANCE                                   | 62  | 0.32 | 1.4  | 0.0001 | 0.5692 |
| GO_PROTEIN_AUTOUBIQUITINATION                                           | 47  | 0.35 | 1.39 | 0.0001 | 0.572  |
| GO_DNA_REPAIR                                                           | 421 | 0.27 | 1.39 | 0.0001 | 0.5706 |



|                                                                          |     |      |      |        |        |
|--------------------------------------------------------------------------|-----|------|------|--------|--------|
| GO_INTRINSIC_APOPTOTIC_SIGNALING_PATHWAY_BY_P53_CLASS_MEDIATOR           | 50  | 0.34 | 1.38 | 0.0001 | 0.5905 |
| GO_ERYTHROCYTE_DEVELOPMENT                                               | 22  | 0.43 | 1.37 | 0.0001 | 0.6066 |
| GO_POSITIVE_REGULATION_OF_CELL_MORPHOGENESIS_INVOLVED_IN_DIFFERENTIATION | 155 | 0.29 | 1.36 | 0.0001 | 0.6055 |
| GO_CENTRAL_NERVOUS_SYSTEM_NEURON_DEVELOPMENT                             | 69  | 0.43 | 1.36 | 0.0001 | 0.6061 |
| GO_TELOMERE_ORGANIZATION                                                 | 77  | 0.36 | 1.35 | 0.0001 | 0.6133 |
| GO_REGULATION_OF_PROTEIN_POLYMERIZATION                                  | 163 | 0.24 | 1.34 | 0.0001 | 0.6149 |
| GO_PROTEIN_ACYLATION                                                     | 138 | 0.25 | 1.33 | 0.0001 | 0.6451 |
| GO_OSTEOLAST_DIFFERENTIATION                                             | 125 | 0.29 | 1.33 | 0.0001 | 0.6418 |
| GO_WNT_SIGNALING_PATHWAY                                                 | 336 | 0.24 | 1.32 | 0.0001 | 0.6338 |
| GO_EPIDERMAL_GROWTH_FACTOR_RECEPTOR_BINDING                              | 30  | 0.42 | 1.32 | 0.0001 | 0.6375 |
| GO_POSITIVE_REGULATION_OF_AXONOGENESIS                                   | 66  | 0.28 | 1.32 | 0.0001 | 0.6408 |
| GO_NEGATIVE_REGULATION_OF_MULTICELLULAR_ORGANISM_PROCESS                 | 131 | 0.32 | 1.31 | 0.0001 | 0.6484 |
| GO_TRANSFERASE_ACTIVITY_TRANSFERRING_NITROGENOUS_GROUPS                  | 21  | 0.35 | 1.31 | 0.0001 | 0.6479 |
| GO_PRIMARY_ALCOHOL_METABOLIC_PROCESS                                     | 39  | 0.36 | 1.31 | 0.0001 | 0.646  |
| GO_ACTIN_CYTOSKELETON_REORGANIZATION                                     | 54  | 0.32 | 1.3  | 0.0001 | 0.6478 |
| GO_TRANSCRIPTION_COREPRESSOR_ACTIVITY                                    | 201 | 0.24 | 1.3  | 0.0001 | 0.648  |
| GO_REGULATION_OF_RESPONSE_TO_BIOTIC_STIMULUS                             | 197 | 0.28 | 1.26 | 0.0001 | 0.7109 |
| GO_NUCLEAR_CHROMOSOME                                                    | 435 | 0.23 | 1.22 | 0.0001 | 0.7705 |

**Table S15-** Gene set enrichment analysis by gene ontology of microarray data obtained from Ala92-Dio2 mice and Thr92-Dio2 mice in cerebellum. Listed gene sets were significant at a nominal p-value <1%.

| Name of the Gene ontology (GO) gene sets enriched in Thr mice (Cerebellum) | Size of gene sets | ES    | NES    | NOM p-val | FDR q-val |
|----------------------------------------------------------------------------|-------------------|-------|--------|-----------|-----------|
| GO_LYMPH_NODE_DEVELOPMENT                                                  | 17                | -0.66 | -1.795 | 0.0001    | 1         |
| GO_SYNCYTIUM_FORMATION                                                     | 21                | -0.51 | -1.709 | 0.0001    | 1         |
| GO_MYOBLAST_FUSION                                                         | 17                | -0.54 | -1.701 | 0.0001    | 1         |
| GO_GLYCOPROTEIN_COMPLEX                                                    | 21                | -0.63 | -1.659 | 0.0001    | 1         |
| GO_POSITIVE_REGULATION_OF_GLUCOSE_TRANSPORT                                | 39                | -0.46 | -1.644 | 0.0001    | 1         |
| GO_NEUTROPHIL_MEDIATED_IMMUNITY                                            | 17                | -0.56 | -1.631 | 0.0001    | 1         |
| GO_INWARD_RECTIFIER_POTASSIUM_CHANNEL_ACTIVITY                             | 21                | -0.65 | -1.628 | 0.0001    | 1         |
| GO_REGULATION_OF_POSTTRANSCRIPTIONAL_GENE_SILENCING                        | 20                | -0.57 | -1.627 | 0.0001    | 1         |
| GO_GRANULOCYTE_ACTIVATION                                                  | 18                | -0.69 | -1.618 | 0.0001    | 1         |
| GO_PROTEIN_HYDROXYLATION                                                   | 15                | -0.57 | -1.615 | 0.0001    | 1         |
| GO_REGULATION_OF_ENDOTHELIAL_CELL_APOPTOTIC_PROCESS                        | 39                | -0.54 | -1.587 | 0.0001    | 1         |
| GO_ENDOSOME_LUMEN                                                          | 22                | -0.47 | -1.565 | 0.0001    | 1         |
| GO_REGULATION_OF_ANTIGEN_RECEPTOR_MEDIATED_SIGNALING_PATHWAY               | 36                | -0.49 | -1.562 | 0.0001    | 1         |
| GO_POSITIVE_REGULATION_OF_JUN_KINASE_ACTIVITY                              | 60                | -0.46 | -1.53  | 0.0001    | 1         |
| GO_LIPOPOLYSACCHARIDE_BINDING                                              | 19                | -0.59 | -1.502 | 0.0001    | 1         |
| GO_LYMPHOCYTE_COSTIMULATION                                                | 61                | -0.45 | -1.49  | 0.0001    | 1         |
| GO_CELLULAR_TRANSITION_METAL_ION_HOMEOSTASIS                               | 73                | -0.35 | -1.468 | 0.0001    | 1         |
| GO_REGULATION_OF_LEUKOCYTE_MEDIATED_IMMUNITY                               | 135               | -0.4  | -1.464 | 0.0001    | 1         |
| GO_PROTEIN_SERINE_THREONINE_TYROSINE_KINASE_ACTIVITY                       | 38                | -0.38 | -1.451 | 0.0001    | 1         |

|                                                |     |       |        |        |   |
|------------------------------------------------|-----|-------|--------|--------|---|
| GO_DEFENSE_RESPONSE_TO_GRAM_POSITIVE_BACTERIUM | 51  | -0.44 | -1.447 | 0.0001 | 1 |
| GO_REGULATION_OF_JUN_KINASE_ACTIVITY           | 75  | -0.41 | -1.436 | 0.0001 | 1 |
| GO_REGULATION_OF_GLUCOSE_IMPORT                | 56  | -0.37 | -1.427 | 0.0001 | 1 |
| GO_CELL_CELL_JUNCTION_ASSEMBLY                 | 73  | -0.33 | -1.416 | 0.0001 | 1 |
| GO_EXTRINSIC_APOPTOTIC_SIGNALING_PATHWAY       | 90  | -0.32 | -1.415 | 0.0001 | 1 |
| GO_FILOPODIUM_MEMBRANE                         | 18  | -0.46 | -1.406 | 0.0001 | 1 |
| GO_RESPONSE_TO_ACTIVITY                        | 65  | -0.37 | -1.398 | 0.0001 | 1 |
| GO_BICELLULAR_TIGHT_JUNCTION_ASSEMBLY          | 31  | -0.42 | -1.379 | 0.0001 | 1 |
| GO_RESPONSE_TO_STEROL                          | 23  | -0.37 | -1.377 | 0.0001 | 1 |
| GO_AMINO_SUGAR_METABOLIC_PROCESS               | 37  | -0.38 | -1.35  | 0.0001 | 1 |
| GO_PLATELET_ALPHA_GRANULE_LUMEN                | 53  | -0.38 | -1.348 | 0.0001 | 1 |
| GO_APICAL_JUNCTION_ASSEMBLY                    | 39  | -0.36 | -1.335 | 0.0001 | 1 |
| GO_POSITIVE_REGULATION_OF_CELL_ACTIVATION      | 256 | -0.33 | -1.332 | 0.0001 | 1 |
| GO_LIPID_LOCALIZATION                          | 235 | -0.32 | -1.321 | 0.0001 | 1 |
| GO_SKELETAL_MUSCLE_TISSUE_REGENERATION         | 25  | -0.4  | -1.319 | 0.0001 | 1 |
| GO_ACTIVATION_OF_MAPK_ACTIVITY                 | 131 | -0.31 | -1.291 | 0.0001 | 1 |
| GO_REGULATION_OF_KIDNEY_DEVELOPMENT            | 55  | -0.36 | -1.284 | 0.0001 | 1 |
| GO_DETECTION_OF_STIMULUS                       | 419 | -0.33 | -1.276 | 0.0001 | 1 |
| GO_HEXOSE_METABOLIC_PROCESS                    | 147 | -0.28 | -1.262 | 0.0001 | 1 |
| GO_REGULATION_OF_CELL_ACTIVATION               | 416 | -0.27 | -1.2   | 0.0001 | 1 |

---

**Table S16-** Gene set enrichment analysis by gene ontology of microarray data obtained from Ala92-Dio2 mice and Thr92-Dio2 mice in hippocampus. Listed gene sets were significant at a nominal p-value <1%.

| Name of the Gene ontology (GO) gene sets enriched in Ala mice (hippocampus) | Size of gene sets | ES    | NES   | NOM p-val | FDR q-val |
|-----------------------------------------------------------------------------|-------------------|-------|-------|-----------|-----------|
| GO_AP_TYPE_MEMBRANE_COAT_ADAPTOR_COMPLEX                                    | 36                | 0.48  | 1.781 | 1E-04     | 1         |
| GO_INTRACELLULAR_LIPID_TRANSPORT                                            | 20                | 0.548 | 1.777 | 1E-04     | 0.6691    |
| GO_MRNA_TRANSCRIPTION                                                       | 21                | 0.383 | 1.747 | 1E-04     | 0.7079    |
| GO_MRNA_TRANSCRIPTION_FROM_RNA_POLYMERASE_II_PROMOTER                       | 15                | 0.489 | 1.717 | 1E-04     | 0.8021    |
| GO_DNA_DOUBLE_STRAND_BREAK_PROCESSING                                       | 18                | 0.661 | 1.656 | 1E-04     | 1         |
| GO_MYOSIN_BINDING                                                           | 58                | 0.419 | 1.609 | 1E-04     | 1         |
| GO_COMPLEMENT_BINDING                                                       | 16                | 0.685 | 1.586 | 1E-04     | 1         |
| GO_ENDOPLASMIC_RETICULUM_ORGANIZATION                                       | 37                | 0.475 | 1.582 | 1E-04     | 1         |
| GO_VESICLE_DOCKING                                                          | 52                | 0.429 | 1.556 | 1E-04     | 1         |
| GO_CILIARY_TIP                                                              | 42                | 0.439 | 1.554 | 1E-04     | 1         |
| GO_RESPONSE_TO_AMINE                                                        | 48                | 0.473 | 1.552 | 1E-04     | 1         |
| GO_RIBONUCLEOPROTEIN_GRANULE                                                | 132               | 0.324 | 1.549 | 1E-04     | 1         |
| GO_VESICLE_DOCKING_INVOLVED_IN_EXOCYTOSIS                                   | 34                | 0.391 | 1.539 | 1E-04     | 1         |
| GO_HEXOSE_CATABOLIC_PROCESS                                                 | 44                | 0.384 | 1.531 | 1E-04     | 1         |
| GO_SUBSTRATE_DEPENDENT_CELL_MIGRATION                                       | 26                | 0.549 | 1.523 | 1E-04     | 1         |
| GO_CYTOKINE_PRODUCTION_INVOLVED_IN_IMMUNE_RESPONSE                          | 17                | 0.517 | 1.519 | 1E-04     | 1         |
| GO_CELLULAR_RESPONSE_TO_INTERLEUKIN_1                                       | 71                | 0.417 | 1.506 | 1E-04     | 1         |
| GO_PROTEIN_TRANSPORT_ALONG_MICROTUBULE                                      | 25                | 0.542 | 1.499 | 1E-04     | 1         |
| GO_RESPONSE_TO_X_RAY                                                        | 30                | 0.472 | 1.499 | 1E-04     | 1         |
| GO_POSITIVE_REGULATION_OF_ORGANIC_ACID_TRANSPORT                            | 28                | 0.472 | 1.498 | 1E-04     | 1         |
| GO_GANGLIOSIDE_METABOLIC_PROCESS                                            | 23                | 0.392 | 1.49  | 1E-04     | 1         |
| GO_REGULATION_OF_SYNAPTIC_VESICLE_EXOCYTOSIS                                | 19                | 0.533 | 1.488 | 1E-04     | 1         |

|                                                                                |     |       |       |       |   |
|--------------------------------------------------------------------------------|-----|-------|-------|-------|---|
| GO_TRNA_METHYLTRANSFERASE_ACTIVITY                                             | 16  | 0.481 | 1.485 | 1E-04 | 1 |
| GO_MEMBRANE_DOCKING                                                            | 63  | 0.389 | 1.482 | 1E-04 | 1 |
| GO_REGULATION_OF_ORGANIC_ACID_TRANSPORT                                        | 48  | 0.386 | 1.48  | 1E-04 | 1 |
| GO_CRANIAL_NERVE_MORPHOGENESIS                                                 | 22  | 0.497 | 1.476 | 1E-04 | 1 |
| GO_RESPONSE_TO_ANTIBIOTIC                                                      | 43  | 0.427 | 1.475 | 1E-04 | 1 |
| GO_PEPTIDASE_ACTIVATOR_ACTIVITY_INVOLVED_IN_APOPTOTIC_PROCESS                  | 20  | 0.495 | 1.474 | 1E-04 | 1 |
| GO_DNA_REPAIR_COMPLEX                                                          | 37  | 0.433 | 1.466 | 1E-04 | 1 |
| GO_MONOSACCHARIDE_CATABOLIC_PROCESS                                            | 53  | 0.362 | 1.456 | 1E-04 | 1 |
| GO_ORGAN_FORMATION                                                             | 34  | 0.382 | 1.446 | 1E-04 | 1 |
| GO_REGULATION_OF_PROTEIN_ACTIVATION_CASCADE                                    | 29  | 0.467 | 1.445 | 1E-04 | 1 |
| GO_APOPTOTIC_CELL_CLEARANCE                                                    | 24  | 0.437 | 1.435 | 1E-04 | 1 |
| GO_ATRIOVENTRICULAR_VALVE_MORPHOGENESIS                                        | 16  | 0.442 | 1.427 | 1E-04 | 1 |
| GO_NEGATIVE_REGULATION_OF_CATION_CHANNEL_ACTIVITY                              | 31  | 0.4   | 1.421 | 1E-04 | 1 |
| GO_OLIGOSACCHARIDE_METABOLIC_PROCESS                                           | 60  | 0.343 | 1.421 | 1E-04 | 1 |
| GO_RESPONSE_TO_INTERLEUKIN_1                                                   | 98  | 0.361 | 1.402 | 1E-04 | 1 |
| GO_REGULATION_OF_NON_CANONICAL_WNT_SIGNALING_PATHWAY                           | 19  | 0.51  | 1.39  | 1E-04 | 1 |
| GO_VESICLE_ORGANIZATION                                                        | 263 | 0.272 | 1.344 | 1E-04 | 1 |
| GO_MOVEMENT_IN_ENVIRONMENT_OF_OTHER_ORGANISM_INVOLVED_IN_SYMBIOTIC_INTERACTION | 80  | 0.32  | 1.333 | 1E-04 | 1 |
| GO_DORSAL_VENTRAL_PATTERN_FORMATIION                                           | 89  | 0.337 | 1.331 | 1E-04 | 1 |
| GO_SPLEEN_DEVELOPMENT                                                          | 38  | 0.368 | 1.325 | 1E-04 | 1 |
| GO_HEART_VALVE_DEVELOPMENT                                                     | 32  | 0.379 | 1.322 | 1E-04 | 1 |
| GO_VASCULATURE_DEVELOPMENT                                                     | 452 | 0.289 | 1.318 | 1E-04 | 1 |
| GO_CELL_AGING                                                                  | 62  | 0.331 | 1.311 | 1E-04 | 1 |
| GO_MYELOID_LEUKOCYTE_MIGRATION                                                 | 80  | 0.345 | 1.308 | 1E-04 | 1 |
| GO_MEMBRANE_FUSION                                                             | 137 | 0.261 | 1.218 | 1E-04 | 1 |
| GO_IN_UTERO_EMBRYONIC_DEVELOPMENT                                              | 306 | 0.224 | 1.195 | 1E-04 | 1 |

---

**Table S17-** Gene set enrichment analysis by gene ontology of microarray data obtained from Ala92-Dio2 mice and Thr92-Dio2 mice in hippocampus. Listed gene sets were significant at a nominal p-value <1%.

| Name of the Gene ontology (GO) gene sets enriched in Thr mice (hippocampus) | Size of gene sets | ES    | NES   | NOM p-val | FDR q-val |
|-----------------------------------------------------------------------------|-------------------|-------|-------|-----------|-----------|
| GO_PROTEIN_DEACETYLASE_ACTIVITY                                             | 42                | -0.44 | -1.77 | 1E-04     | 1         |
| GO_LONG_TERM_MEMORY                                                         | 28                | -0.53 | -1.74 | 1E-04     | 1         |
| GO_REGULATION_OF_GLUCOSE_IMPORT_IN_RESPONSE_TO_INSULIN_STIMULUS             | 16                | -0.64 | -1.7  | 1E-04     | 1         |
| GO_DEACETYLASE_ACTIVITY                                                     | 53                | -0.38 | -1.7  | 1E-04     | 1         |
| GO_PRE_AUTOPHAGOSOMAL_STRUCTURE_MEMBRANE                                    | 15                | -0.55 | -1.69 | 1E-04     | 0.987     |
| GO_S_ADENOSYLMETHIONINE_METABOLIC_PROCESS                                   | 18                | -0.53 | -1.68 | 1E-04     | 0.924     |
| GO_NUCLEAR_TRANSCRIPTIONAL_REPRESSOR_COMPLEX                                | 21                | -0.45 | -1.68 | 1E-04     | 0.83      |
| GO_DNA_DIRECTED_RNA_POLYMERASE_II_CORE_COMPLEX                              | 15                | -0.56 | -1.66 | 1E-04     | 0.763     |
| GO_POSITIVE_REGULATION_OF_DNA_BINDING                                       | 41                | -0.43 | -1.58 | 1E-04     | 1         |
| GO_PROTON_TRANSPORTING_TWO_SECTOR_ATPASE_COMPLEX_PROTON_TRANSPORTING_DOMAIN | 19                | -0.56 | -1.57 | 1E-04     | 1         |
| GO_FLAVIN_ADENINE_DINUCLEOTIDE_BINDING                                      | 72                | -0.38 | -1.55 | 1E-04     | 1         |
| GO_HYDROLASE_ACTIVITY_ACTING_ON_CARBOXYL_GROUPS_OF_AMIDES                   | 26                | -0.52 | -1.55 | 1E-04     | 1         |
| GO_REGULATION_OF_TRANSCRIPTION_INITIATION_FROM_RNA_POLYMERASE_II_PROMOTER   | 23                | -0.44 | -1.55 | 1E-04     | 1         |
| GO_NAD_DEPENDENT_PROTEIN_DEACETYLASE_ACTIVITY                               | 17                | -0.54 | -1.54 | 1E-04     | 0.968     |
| GO_SECONDARY_METABOLITE_BIOSYNTHETIC_PROCESS                                | 16                | -0.71 | -1.54 | 1E-04     | 0.913     |
| GO_REGULATION_OF_PROTEIN_ACETYLATION                                        | 61                | -0.4  | -1.53 | 1E-04     | 0.871     |

|                                                                |     |       |       |       |       |
|----------------------------------------------------------------|-----|-------|-------|-------|-------|
| GO_POSITIVE_REGULATION_OF_MYELOID_CELL_DIFFERENTIATION         | 76  | -0.44 | -1.52 | 1E-04 | 0.919 |
| GO_POSITIVE_REGULATION_OF_MYELOID_LEUKOCYTE_DIFFERENTIATION    | 46  | -0.5  | -1.52 | 1E-04 | 0.89  |
| GO_REGULATION_OF_ACTIN_CYTOSKELETON_REORGANIZATION             | 31  | -0.47 | -1.51 | 1E-04 | 0.893 |
| GO_CONDENSED_NUCLEAR_CHROMOSOME_CENTROMERIC_REGION             | 16  | -0.68 | -1.51 | 1E-04 | 0.877 |
| GO_REGULATION_OF_LIPID_CATABOLIC_PROCESS                       | 50  | -0.47 | -1.51 | 1E-04 | 0.858 |
| GO_PHOSPHOTRANSFERASE_ACTIVITY_PHOSPHATE_GROUP_AS_ACCEPTOR     | 37  | -0.42 | -1.5  | 1E-04 | 0.869 |
| GO_RESPONSE_TO_PAIN                                            | 29  | -0.51 | -1.49 | 1E-04 | 0.913 |
| GO_SULFUR_AMINO_ACID_METABOLIC_PROCESS                         | 40  | -0.36 | -1.46 | 1E-04 | 0.93  |
| GO_WIDE_PORE_CHANNEL_ACTIVITY                                  | 23  | -0.48 | -1.46 | 1E-04 | 0.924 |
| GO_REGULATION_OF_DNA_BINDING                                   | 89  | -0.35 | -1.46 | 1E-04 | 0.915 |
| GO_AROMATIC_AMINO_ACID_FAMILY_METABOLIC_PROCESS                | 26  | -0.55 | -1.43 | 1E-04 | 0.949 |
| GO_GAP_JUNCTION_CHANNEL_ACTIVITY                               | 16  | -0.62 | -1.42 | 1E-04 | 0.956 |
| GO_REGULATION_OF_CATENIN_IMPORT_INTO_NUCLEUS                   | 27  | -0.42 | -1.41 | 1E-04 | 0.951 |
| GO_POSITIVE_REGULATION_OF_EPITHELIAL_TO_MESENCHYMAL_TRANSITION | 32  | -0.41 | -1.41 | 1E-04 | 0.931 |
| GO_NEGATIVE_REGULATION_OF_CELLULAR_CATABOLIC_PROCESS           | 148 | -0.3  | -1.4  | 1E-04 | 0.943 |
| GO_ERROR_PRONE_TRANSLESION_SYNTESIS                            | 19  | -0.36 | -1.39 | 1E-04 | 0.95  |
| GO_POSITIVE_REGULATION_OF_PROTEIN_LOCALIZATION_TO_NUCLEUS      | 125 | -0.33 | -1.38 | 1E-04 | 1     |
| GO_WNT_SIGNALING_PATHWAY_CALCIIUM_MODULATING_PATHWAY           | 35  | -0.41 | -1.38 | 1E-04 | 1     |

|                                                           |     |       |       |       |   |
|-----------------------------------------------------------|-----|-------|-------|-------|---|
| GO_EMBRYONIC_DIGESTIVE_TRACT_DEVELOPMENT                  | 32  | -0.42 | -1.37 | 1E-04 | 1 |
| GO_REGULATION_OF_DNA_TEMPLATED_TRANSCRIPTION_INITIATION   | 31  | -0.36 | -1.37 | 1E-04 | 1 |
| GO_POSITIVE_REGULATION_OF_NUCLEOCYTOPLASMIC_TRANSPORT     | 117 | -0.33 | -1.35 | 1E-04 | 1 |
| GO_EMBRYONIC_SKELETAL_SYSTEM_MORPHOGENESIS                | 90  | -0.38 | -1.32 | 1E-04 | 1 |
| GO_POSITIVE_REGULATION_OF_PROTEIN_IMPORT                  | 101 | -0.34 | -1.32 | 1E-04 | 1 |
| GO_STRUCTURE_SPECIFIC_DNA_BINDING                         | 116 | -0.26 | -1.32 | 1E-04 | 1 |
| GO_POSITIVE_REGULATION_OF_BINDING                         | 125 | -0.27 | -1.3  | 1E-04 | 1 |
| GO_COFACTOR_BINDING                                       | 248 | -0.25 | -1.29 | 1E-04 | 1 |
| GO_POSITIVE_REGULATION_OF_INTRACELLULAR_PROTEIN_TRANSPORT | 234 | -0.24 | -1.27 | 1E-04 | 1 |
| GO_CELL_COMMUNICATION_INVOLVED_IN_CARDIAC_CONDUCTION      | 36  | -0.38 | -1.26 | 1E-04 | 1 |
| GO_REGULATION_OF_OSTEOBLAST_DIFFERENTIATION               | 108 | -0.28 | -1.22 | 1E-04 | 1 |

---



**Table S18-** Gene set enrichment analysis by gene ontology of microarray data obtained from Ala92-Dio2 mice and Thr92-Dio2 mice in pre-frontal cortex. Listed gene sets were significant at a nominal p-value <1%.

| Name of the Gene ontology (GO) gene sets enriched in Ala mice (pre-frontal cortex) | Size of gene sets | ES     | NES   | NOM p-val | FDR q-val |
|------------------------------------------------------------------------------------|-------------------|--------|-------|-----------|-----------|
| GO_ENDOPLASMIC_RETICULUM_GOLGI_INTERMEDIATE_COMPARTMENT_MEMBRANE                   | 57                | 0.4554 | 1.844 | 0.0001    | 0.398     |
| GO_ENDOPLASMIC_RETICULUM_GOLGI_INTERMEDIATE_COMPARTMENT                            | 96                | 0.4408 | 1.768 | 0.0001    | 0.435     |
| GO_PROTEIN_N_LINKED_GLYCOSYLATION                                                  | 69                | 0.4144 | 1.738 | 0.0001    | 0.453     |
| GO_ARF_GUANYL_NUCLEOTIDE_EXCHANGE_FACTOR_ACTIVITY                                  | 23                | 0.4867 | 1.725 | 0.0001    | 0.448     |
| GO_RESPONSE_TO_WATER                                                               | 18                | 0.4663 | 1.706 | 0.0001    | 0.499     |
| GO_PORPHYRIN_CONTAINING_COMPOUND_METABOLIC_PROCESS                                 | 34                | 0.4909 | 1.698 | 0.0001    | 0.486     |
| GO_CELLULAR_RESPONSE_TO_GAMMA_RADIATION                                            | 19                | 0.4945 | 1.696 | 0.0001    | 0.458     |
| GO_CELLULAR_RESPONSE_TO_TOXIC_SUBSTANCE                                            | 24                | 0.4676 | 1.695 | 0.0001    | 0.42      |
| GO_MYELIN_ASSEMBLY                                                                 | 15                | 0.5798 | 1.66  | 0.0001    | 0.623     |
| GO_NEUTROPHIL_MEDIATED_IMMUNITY                                                    | 17                | 0.5115 | 1.628 | 0.0001    | 0.719     |
| GO_TETRAPYRROLE_BIOSYNTHETIC_PROCESS                                               | 27                | 0.4592 | 1.615 | 0.0001    | 0.794     |
| GO_INTRACELLULAR_LIPID_TRANSPORT                                                   | 20                | 0.4322 | 1.564 | 0.0001    | 1         |
| GO_ENDOPLASMIC_RETICULUM_ORGANIZATION                                              | 37                | 0.3939 | 1.552 | 0.0001    | 1         |
| GO_NADP_BINDING                                                                    | 40                | 0.4329 | 1.545 | 0.0001    | 1         |
| GO_RETINA_LAYER_FORMATION                                                          | 22                | 0.4855 | 1.545 | 0.0001    | 1         |
| GO_ACETYLGUCOSAMINYLTRANSFERASE_ACTIVITY                                           | 45                | 0.4351 | 1.542 | 0.0001    | 1         |
| GO_OLIGOSACCHARIDE_METABOLIC_PROCESS                                               | 60                | 0.3543 | 1.53  | 0.0001    | 1         |
| GO_CALMODULIN_DEPENDENT_PROTEIN_KINASE_ACTIVITY                                    | 27                | 0.4487 | 1.524 | 0.0001    | 1         |
| GO_LEUKOCYTE_MEDIATED_CYTOTOXICITY                                                 | 22                | 0.5761 | 1.521 | 0.0001    | 1         |
| GO_NEGATIVE_REGULATION_OF_TYPE_I_INTERFERON_PRODUCTION                             | 37                | 0.3978 | 1.517 | 0.0001    | 1         |

|                                                                    |     |        |       |        |       |
|--------------------------------------------------------------------|-----|--------|-------|--------|-------|
| GO_REGULATION_OF_TRANSCRIPTION_FACTOR_IMPORT_INTO_NUCLEUS          | 92  | 0.3118 | 1.508 | 0.0001 | 0.963 |
| GO_BILE_ACID_BIOSYNTHETIC_PROCESS                                  | 19  | 0.5096 | 1.455 | 0.0001 | 1     |
| GO_LIGASE_ACTIVITY_FORMING_CARBON_OXYGEN_BONDS                     | 42  | 0.3636 | 1.455 | 0.0001 | 1     |
| GO_ER_TO_GOLGI_TRANSPORT_VESICLE                                   | 52  | 0.3016 | 1.453 | 0.0001 | 1     |
| GO_N_GLYCAN_PROCESSING                                             | 19  | 0.4395 | 1.446 | 0.0001 | 1     |
| GO_MONOSACCHARIDE_TRANSPORT                                        | 53  | 0.4291 | 1.429 | 0.0001 | 1     |
| GO_POSTTRANSCRIPTIONAL_GENE_SILENCING                              | 36  | 0.3817 | 1.411 | 0.0001 | 1     |
| GO_SARCOPLASMIC_RETICULUM_MEMBRANE                                 | 36  | 0.3971 | 1.405 | 0.0001 | 1     |
| GO_REGULATION_OF_CELLULAR_RESPONSE_TO_HEAT                         | 70  | 0.3427 | 1.405 | 0.0001 | 1     |
| GO_GOLGI_TO_VACUOLE_TRANSPORT                                      | 24  | 0.4359 | 1.402 | 0.0001 | 1     |
| GO_BASE_EXCISION_REPAIR                                            | 39  | 0.3646 | 1.401 | 0.0001 | 1     |
| GO_MYOTUBE_CELL_DEVELOPMENT                                        | 23  | 0.4133 | 1.384 | 0.0001 | 1     |
| GO_INTRINSIC_COMPONENT_OF_ORGANELLE_MEMBRANE                       | 228 | 0.2331 | 1.361 | 0.0001 | 1     |
| GO_NEGATIVE_REGULATION_OF_NF_KAPPA_B_TRANSCRIPTION_FACTOR_ACTIVITY | 59  | 0.3424 | 1.339 | 0.0001 | 1     |

---

**Table S19-** Gene set enrichment analysis by gene ontology of microarray data obtained from Ala92-Dio2 mice and Thr92-Dio2 mice in pre-frontal cortex. Listed gene sets were significant at a nominal p-value <1%.

| Name of the Gene ontology (GO) gene sets enriched in Thr mice (pre-frontal cortex)         | Size of gene sets | ES    | NES    | NOM p-val | FDR q-val |
|--------------------------------------------------------------------------------------------|-------------------|-------|--------|-----------|-----------|
| GO_REGULATION_OF_MEMBRANE_REPOLARIZATION                                                   | 29                | -0.58 | -1.935 | 0.0001    | 0.08791   |
| GO_REGULATION_OF_CARDIAC_MUSCLE_CELL_MEMBRANE_REPOLARIZATION                               | 20                | -0.6  | -1.745 | 0.0001    | 1         |
| GO_PROTEIN_IMPORT_INTO_NUCLEUS_TRANSLOCATION                                               | 28                | -0.48 | -1.718 | 0.0001    | 1         |
| GO_CLATHRIN_COATED_ENDOCYTIC_VESICLE_MEMBRANE                                              | 36                | -0.43 | -1.708 | 0.0001    | 1         |
| GO_POSITIVE_REGULATION_OF_NOTCH_SIGNALING_PATHWAY                                          | 33                | -0.55 | -1.688 | 0.0001    | 1         |
| GO_REGULATION_OF_TRIGLYCERIDE_BIOSYNTHETIC_PROCESS                                         | 17                | -0.52 | -1.663 | 0.0001    | 1         |
| GO_NEGATIVE_REGULATION_OF_EPITHELIAL_TO_MESENCHYMAL_TRANSITION                             | 22                | -0.6  | -1.643 | 0.0001    | 1         |
| GO_POSITIVE_REGULATION_OF_MEMBRANE_PROTEIN_ECTODOMAIN_PROTEOLYSIS                          | 15                | -0.56 | -1.643 | 0.0001    | 1         |
| GO_GLYCOSYL_COMPOUND_CATABOLIC_PROCESS                                                     | 32                | -0.53 | -1.636 | 0.0001    | 1         |
| GO_ENDOCYTIC_VESICLE_MEMBRANE                                                              | 129               | -0.34 | -1.625 | 0.0001    | 1         |
| GO_MORPHOGENESIS_OF_A_POLARIZED_EPITHELIUM                                                 | 26                | -0.49 | -1.618 | 0.0001    | 1         |
| GO_NEGATIVE_REGULATION_OF_EXTRINSIC_APOPTOTIC_SIGNALING_PATHWAY_VIA_DEATH_DOMAIN_RECEPTORS | 32                | -0.48 | -1.612 | 0.0001    | 1         |
| GO_SEX_DETERMINATION                                                                       | 22                | -0.66 | -1.611 | 0.0001    | 1         |
| GO_HAIR_CELL_DIFFERENTIATION                                                               | 35                | -0.44 | -1.607 | 0.0001    | 1         |
| GO_NEGATIVE_REGULATION_OF_AMINE_TRANSPORT                                                  | 25                | -0.46 | -1.591 | 0.0001    | 1         |
| GO_ISOPRENOID_BINDING                                                                      | 27                | -0.6  | -1.581 | 0.0001    | 1         |
| GO_RIBONUCLEOSIDE_CATABOLIC_PROCESS                                                        | 18                | -0.56 | -1.575 | 0.0001    | 1         |
| GO_ALCOHOL_TRANSMEMBRANE_TRANSPORTER_ACTIVITY                                              | 21                | -0.55 | -1.562 | 0.0001    | 1         |

|                                                                   |     |       |        |        |   |
|-------------------------------------------------------------------|-----|-------|--------|--------|---|
| GO_NEGATIVE_REGULATION_OF_PROTEIN_KINASE_B_SIGNALING              | 35  | -0.4  | -1.545 | 0.0001 | 1 |
| GO_COFACTOR_TRANSPORT                                             | 25  | -0.46 | -1.535 | 0.0001 | 1 |
| GO_AUDITORY_RECEPTOR_CELL_DIFFERENTIATION                         | 28  | -0.41 | -1.529 | 0.0001 | 1 |
| GO_MATURE_B_CELL_DIFFERENTIATION                                  | 17  | -0.53 | -1.518 | 0.0001 | 1 |
| GO_REGULATION_OF_TRIGLYCERIDE_METABOLIC_PROCESS                   | 32  | -0.45 | -1.511 | 0.0001 | 1 |
| GO_BLOOD_COAGULATION_FIBRIN_CLOT_FORMATION                        | 23  | -0.57 | -1.508 | 0.0001 | 1 |
| GO_EPHRIN_RECEPTOR_BINDING                                        | 24  | -0.4  | -1.506 | 0.0001 | 1 |
| GO_REGULATION_OF_MAST_CELL_ACTIVATION_INVOLVED_IN_IMMUNE_RESPONSE | 29  | -0.47 | -1.506 | 0.0001 | 1 |
| GO_REGULATION_OF_EPITHELIAL_TO_MESENCHYMAL_TRANSITION             | 64  | -0.41 | -1.497 | 0.0001 | 1 |
| GO_PYRIMIDINE_CONTAINING_COMPOUND_CATABOLIC_PROCESS               | 25  | -0.5  | -1.486 | 0.0001 | 1 |
| GO_CARDIAC_CELL_DEVELOPMENT                                       | 49  | -0.39 | -1.484 | 0.0001 | 1 |
| GO_I_BAND                                                         | 117 | -0.37 | -1.484 | 0.0001 | 1 |
| GO_CARDIAC_MUSCLE_CELL_DIFFERENTIATION                            | 74  | -0.39 | -1.484 | 0.0001 | 1 |
| GO_REGULATION_OF_PROTEIN_KINASE_B_SIGNALING                       | 114 | -0.34 | -1.477 | 0.0001 | 1 |
| GO_VENTRICULAR_SEPTUM_MORPHOGENESIS                               | 28  | -0.5  | -1.476 | 0.0001 | 1 |
| GO_REGULATION_OF_CARDIAC_MUSCLE_CONTRACTION                       | 64  | -0.37 | -1.474 | 0.0001 | 1 |
| GO_REGULATION_OF_MEMBRANE_PROTEIN_ECTODOMAIN_PROTEOLYSIS          | 21  | -0.44 | -1.471 | 0.0001 | 1 |
| GO_ORGANIC_HYDROXY_COMPOUND_TRANSMEMBRANE_TRANSPORTER_ACTIVITY    | 54  | -0.44 | -1.466 | 0.0001 | 1 |
| GO_REGULATION_OF_MAST_CELL_ACTIVATION                             | 37  | -0.47 | -1.465 | 0.0001 | 1 |
| GO_SERINE_TYPE_EXOPEPTIDASE_ACTIVITY                              | 18  | -0.48 | -1.463 | 0.0001 | 1 |
| GO_REGULATION_OF_VIRAL_TRANSCRIPTION                              | 57  | -0.38 | -1.463 | 0.0001 | 1 |
| GO_CELLULAR_RESPONSE_TO_EXTRACELLULAR_STIMULUS                    | 177 | -0.3  | -1.456 | 0.0001 | 1 |
| GO_CONTRACTILE_FIBER                                              | 203 | -0.35 | -1.455 | 0.0001 | 1 |
| GO_G_PROTEIN_COUPLED_RECEPTOR_BINDING                             | 225 | -0.36 | -1.455 | 0.0001 | 1 |

|                                                              |     |       |        |        |   |
|--------------------------------------------------------------|-----|-------|--------|--------|---|
| GO_PARASYMPATHETIC_NERVOUS_SYSTEM_DEVELOPMENT                | 17  | -0.5  | -1.453 | 0.0001 | 1 |
| GO_LIPID_PARTICLE                                            | 58  | -0.3  | -1.452 | 0.0001 | 1 |
| GO_REGULATION_OF_APPETITE                                    | 21  | -0.53 | -1.444 | 0.0001 | 1 |
| GO_NEGATIVE_REGULATION_OF_VIRAL_PROCESS                      | 75  | -0.36 | -1.437 | 0.0001 | 1 |
| GO_CELLULAR_RESPONSE_TO_PROSTAGLANDIN_STIMULUS               | 22  | -0.46 | -1.435 | 0.0001 | 1 |
| GO_LEUKOTRIENE_METABOLIC_PROCESS                             | 23  | -0.52 | -1.426 | 0.0001 | 1 |
| GO_CARDIOCYTE_DIFFERENTIATION                                | 95  | -0.37 | -1.42  | 0.0001 | 1 |
| GO_FERTILIZATION                                             | 127 | -0.36 | -1.416 | 0.0001 | 1 |
| GO_SINGLE_FERTILIZATION                                      | 95  | -0.37 | -1.414 | 0.0001 | 1 |
| GO_RESPONSE_TO_STARVATION                                    | 143 | -0.28 | -1.413 | 0.0001 | 1 |
| GO_REGULATION_OF_DEFENSE_RESPONSE_TO_VIRUS_BY_VIRUS          | 27  | -0.37 | -1.409 | 0.0001 | 1 |
| GO_REGULATION_OF_LYMPHOCYTE_MIGRATION                        | 32  | -0.43 | -1.408 | 0.0001 | 1 |
| GO_PROTEOGLYCAN_BINDING                                      | 26  | -0.41 | -1.391 | 0.0001 | 1 |
| GO_RESPONSE_TO_PROSTAGLANDIN                                 | 25  | -0.41 | -1.39  | 0.0001 | 1 |
| GO_PEPTIDASE_REGULATOR_ACTIVITY                              | 177 | -0.36 | -1.386 | 0.0001 | 1 |
| GO_NEGATIVE_REGULATION_OF_ENDOTHELIAL_CELL_APOPTOTIC_PROCESS | 27  | -0.42 | -1.386 | 0.0001 | 1 |
| GO_CARDIAC_CHAMBER_MORPHOGENESIS                             | 103 | -0.35 | -1.385 | 0.0001 | 1 |
| GO_REGULATION_OF_HEART_RATE                                  | 83  | -0.32 | -1.38  | 0.0001 | 1 |
| GO_MONOVALENT_INORGANIC_ANION_HOMEOSTASIS                    | 19  | -0.44 | -1.378 | 0.0001 | 1 |
| GO_MULTICELLULAR_ORGANISM_AGING                              | 29  | -0.47 | -1.368 | 0.0001 | 1 |
| GO_NEGATIVE_REGULATION_OF_POTASSIUM_ION_TRANSPORT            | 31  | -0.44 | -1.353 | 0.0001 | 1 |
| GO_STRIATED_MUSCLE_CELL_DIFFERENTIATION                      | 163 | -0.3  | -1.344 | 0.0001 | 1 |
| GO_RESPONSE_TO_PROSTAGLANDIN                                 | 31  | -0.41 | -1.341 | 0.0001 | 1 |
| GO TRABECULA FORMATION                                       | 23  | -0.44 | -1.341 | 0.0001 | 1 |
| GO_CELLULAR_RESPONSE_TO_FATTY_ACID                           | 49  | -0.35 | -1.333 | 0.0001 | 1 |
| GO_POSITIVE_REGULATION_OF_BLOOD_CIRCULATION                  | 92  | -0.35 | -1.323 | 0.0001 | 1 |
| GO_HORMONE_METABOLIC_PROCESS                                 | 139 | -0.37 | -1.315 | 0.0001 | 1 |
| GO_REGULATION_OF_IMMUNE_EFFECTOR_PROCESS                     | 366 | -0.28 | -1.303 | 0.0001 | 1 |

|                                                       |     |       |        |        |   |
|-------------------------------------------------------|-----|-------|--------|--------|---|
| GO_CARDIAC_CHAMBER_DEVELOPMENT                        | 141 | -0.3  | -1.297 | 0.0001 | 1 |
| GO_TUMOR_NECROSIS_FACTOR_RECEPTOR_SUPERFAMILY_BINDING | 44  | -0.32 | -1.269 | 0.0001 | 1 |
| GO_PROTEIN_HETEROOLIGOMERIZATION                      | 83  | -0.28 | -1.267 | 0.0001 | 1 |
| GO_OVULATION_CYCLE                                    | 108 | -0.28 | -1.238 | 0.0001 | 1 |
| GO_ACTIVATION_OF_IMMUNE_RESPONSE                      | 354 | -0.24 | -1.232 | 0.0001 | 1 |
| GO_NEGATIVE_REGULATION_OF_SECRETION                   | 185 | -0.28 | -1.22  | 0.0001 | 1 |

---

**Table S20-** Gene set enrichment analysis by gene ontology of microarray data obtained from Ala92-Dio2 mice and Thr92-Dio2 mice in striatum. Listed gene sets were significant at a nominal p-value <1%.

| Name of the Gene ontology (GO) gene sets enriched in Ala mice (striatum) | Size of gene sets | ES    | NES   | NOM p-val | FDR q-val |
|--------------------------------------------------------------------------|-------------------|-------|-------|-----------|-----------|
| GO_PHOSPHATIDIC_ACID_METABOLIC_PROCESS                                   | 30                | 0.495 | 1.74  | 0.0001    | 1         |
| GO_PHOSPHATIDYLGLYCEROL_ACYL_CHAIN_REMODELING                            | 16                | 0.685 | 1.72  | 0.0001    | 1         |
| GO_NEUROFILIN_BINDING                                                    | 15                | 0.553 | 1.664 | 0.0001    | 1         |
| GO_NEGATIVE_REGULATION_OF_NUCLEOSIDE_METABOLIC_PROCESS                   | 18                | 0.522 | 1.653 | 0.0001    | 1         |
| GO_CENTRIOLE_ASSEMBLY                                                    | 19                | 0.484 | 1.637 | 0.0001    | 1         |
| GO_RRNA_METHYLATION                                                      | 17                | 0.521 | 1.605 | 0.0001    | 1         |
| GO_DNA_STRAND_ELONGATION                                                 | 30                | 0.514 | 1.587 | 0.0001    | 1         |
| GO_CHROMOSOME_SEPARATION                                                 | 18                | 0.571 | 1.586 | 0.0001    | 1         |
| GO_CILIARY_PLASM                                                         | 72                | 0.39  | 1.57  | 0.0001    | 1         |
| GO_G2_DNA_DAMAGE_CHECKPOINT                                              | 33                | 0.435 | 1.568 | 0.0001    | 1         |
| GO_OXIDOREDUCTASE_ACTIVITY_OXIDIZING_METAL_IONS                          | 17                | 0.671 | 1.568 | 0.0001    | 1         |
| GO_MONOCARBOXYLIC_ACID_TRANSMEMBRANE_TRANSPORTER_ACTIVITY                | 39                | 0.574 | 1.563 | 0.0001    | 1         |
| GO_VITAMIN_TRANSPORTER_ACTIVITY                                          | 20                | 0.552 | 1.556 | 0.0001    | 1         |
| GO_OUTFLOW_TRACT_MORPHOGENESIS                                           | 56                | 0.398 | 1.556 | 0.0001    | 1         |
| GO_ENDOPLASMIC_RETICULUM_GOLGI_INTERMEDIATE_COMPARTMENT_MEMBRANE         | 57                | 0.417 | 1.554 | 0.0001    | 1         |
| GO_APICAL_JUNCTION_COMPLEX                                               | 124               | 0.347 | 1.553 | 0.0001    | 1         |
| GO_RESPONSE_TO_X_RAY                                                     | 30                | 0.461 | 1.545 | 0.0001    | 1         |
| GO_TELOMERE_ORGANIZATION                                                 | 77                | 0.45  | 1.539 | 0.0001    | 1         |
| GO_PHOSPHATIDYLGLYCEROL_METABOLIC_PROCESS                                | 30                | 0.466 | 1.538 | 0.0001    | 1         |
| GO_NEGATIVE_REGULATION_OF_CELL_AGING                                     | 17                | 0.439 | 1.531 | 0.0001    | 1         |
| GO_4_IRON_4_SULFUR_CLUSTER_BINDING                                       | 38                | 0.463 | 1.53  | 0.0001    | 1         |
| GO_PHOSPHATIDYLSERINE_ACYL_CHAIN_REMODELING                              | 16                | 0.648 | 1.518 | 0.0001    | 1         |
| GO_ACYLGLYCEROL_O_ACYLTRANSFERASE_ACTIVITY                               | 25                | 0.455 | 1.518 | 0.0001    | 1         |
| GO_RESPONSE_TO_NITRIC_OXIDE                                              | 21                | 0.523 | 1.513 | 0.0001    | 1         |

|                                                                                                        |     |       |       |        |   |
|--------------------------------------------------------------------------------------------------------|-----|-------|-------|--------|---|
| GO_3_5_EXONUCLEASE_ACTIVITY                                                                            | 44  | 0.471 | 1.511 | 0.0001 | 1 |
| GO_SULFUR_COMPOUND_TRANSPORT                                                                           | 30  | 0.513 | 1.507 | 0.0001 | 1 |
| GO_PEPTIDE_CATABOLIC_PROCESS                                                                           | 20  | 0.536 | 1.504 | 0.0001 | 1 |
| GO_PROTEIN_SELF_ASSOCIATION                                                                            | 41  | 0.506 | 1.503 | 0.0001 | 1 |
| GO_CELL_AGING                                                                                          | 62  | 0.382 | 1.501 | 0.0001 | 1 |
| GO_EMBRYONIC_CRANIAL_SKELETON_MORPHOGENESIS                                                            | 46  | 0.379 | 1.497 | 0.0001 | 1 |
| GO_NEGATIVE_REGULATION_OF_EMBRYONIC_DEVELOPMENT                                                        | 26  | 0.514 | 1.496 | 0.0001 | 1 |
| GO_COPPER_ION_TRANSPORT                                                                                | 18  | 0.649 | 1.493 | 0.0001 | 1 |
| GO_ACTIVE_TRANSMEMBRANE_TRANSPORTER_ACTIVITY                                                           | 332 | 0.378 | 1.485 | 0.0001 | 1 |
| GO_CELLULAR_RESPONSE_TO_REACTIVE_NITROGEN_SPECIES                                                      | 19  | 0.532 | 1.481 | 0.0001 | 1 |
| GO_REGULATION_OF_LEUKOCYTE_DEGRANULATION                                                               | 39  | 0.482 | 1.48  | 0.0001 | 1 |
| GO_CORTICAL_CYTOSKELETON_ORGANIZATION                                                                  | 35  | 0.399 | 1.479 | 0.0001 | 1 |
| GO_SECONDARY_ACTIVE_TRANSMEMBRANE_TRANSPORTER_ACTIVITY                                                 | 216 | 0.432 | 1.475 | 0.0001 | 1 |
| GO_PHOSPHATIDYLCHOLINE_ACYL_CHAIN_REMODELING                                                           | 25  | 0.556 | 1.472 | 0.0001 | 1 |
| GO_SPECIFICATION_OF_SYMMETRY                                                                           | 108 | 0.346 | 1.468 | 0.0001 | 1 |
| GO_POSITIVE_REGULATION_OF_CYSTEINE_TYPE_ENDOPEPTIDASE_ACTIVITY_INVOLVED_IN_APOPTOTIC_SIGNALING_PATHWAY | 15  | 0.555 | 1.464 | 0.0001 | 1 |
| GO_PHOSPHATIDYLINOSITOL_ACYL_CHAIN_REMODELING                                                          | 16  | 0.679 | 1.46  | 0.0001 | 1 |
| GO_STRAND_DISPLACEMENT                                                                                 | 26  | 0.501 | 1.44  | 0.0001 | 1 |
| GO_CELLULAR_RESPONSE_TO_NITRIC_OXIDE                                                                   | 15  | 0.512 | 1.438 | 0.0001 | 1 |
| GO_SULFUR_COMPOUND_TRANSMEMBRANE_TRANSPORTER_ACTIVITY                                                  | 25  | 0.502 | 1.431 | 0.0001 | 1 |
| GO_ER_TO_GOLGI_TRANSPORT_VESICLE_MEMBRANE                                                              | 36  | 0.394 | 1.431 | 0.0001 | 1 |
| GO_NEGATIVE_REGULATION_OF_NEUROLOGICAL_SYSTEM_PROCESS                                                  | 15  | 0.463 | 1.431 | 0.0001 | 1 |
| GO_METHYLATED_HISTONE_BINDING                                                                          | 45  | 0.337 | 1.429 | 0.0001 | 1 |
| GO_SYMPORTER_ACTIVITY                                                                                  | 140 | 0.413 | 1.42  | 0.0001 | 1 |
| GO_POSITIVE_REGULATION_OF_MONOOXYGENASE_ACTIVITY                                                       | 28  | 0.496 | 1.419 | 0.0001 | 1 |
| GO_PHOSPHATIDYLETHANOLAMINE_ACYL_CHAIN_REMODELING                                                      | 22  | 0.591 | 1.419 | 0.0001 | 1 |
| GO_CARDIAC_CELL_DEVELOPMENT                                                                            | 49  | 0.428 | 1.412 | 0.0001 | 1 |



|                                                                                      |     |       |       |        |   |
|--------------------------------------------------------------------------------------|-----|-------|-------|--------|---|
| GO_MITOTIC_DNA_INTEGRITY_CHECKPOINT                                                  | 96  | 0.31  | 1.409 | 0.0001 | 1 |
| GO_METALLOPEPTIDASE_ACTIVITY                                                         | 174 | 0.331 | 1.406 | 0.0001 | 1 |
| GO_SARCOLEMMMA                                                                       | 124 | 0.323 | 1.4   | 0.0001 | 1 |
| GO_DEOXYRIBONUCLEASE_ACTIVITY                                                        | 61  | 0.369 | 1.398 | 0.0001 | 1 |
| GO_METALLOENDOPEPTIDASE_ACTIVITY                                                     | 106 | 0.347 | 1.393 | 0.0001 | 1 |
| GO_RESPONSE_TO_IONIZING_RADIATION                                                    | 135 | 0.268 | 1.387 | 0.0001 | 1 |
| GO_ANION_TRANSMEMBRANE_TRANSPORTER_ACTIVITY                                          | 268 | 0.402 | 1.378 | 0.0001 | 1 |
| GO_INORGANIC_ANION_TRANSMEMBRANE_TRANSPORTER_ACTIVITY                                | 117 | 0.401 | 1.378 | 0.0001 | 1 |
| GO_POSITIVE_REGULATION_OF_ACTIN_FILAMENT_POLYMERIZATION                              | 62  | 0.31  | 1.377 | 0.0001 | 1 |
| GO_SIGNAL_TRANSDUCTION_IN_RESPONSE_TO_DNA_DAMAGE                                     | 92  | 0.288 | 1.374 | 0.0001 | 1 |
| GO_ER_TO_GOLGI_TRANSPORT_VESICLE                                                     | 52  | 0.378 | 1.368 | 0.0001 | 1 |
| GO_REGULATION_OF_CELLULAR_PH                                                         | 70  | 0.362 | 1.367 | 0.0001 | 1 |
| GO_POSITIVE_REGULATION_OF_LIPID_TRANSPORT                                            | 49  | 0.435 | 1.365 | 0.0001 | 1 |
| GO_REGULATION_OF_INSULIN_SECRETION_INVOLVED_IN_CELLULAR_RESPONSE_TO_GLUCOSE_STIMULUS | 48  | 0.338 | 1.357 | 0.0001 | 1 |
| GO_APOPTOTIC_CELL_CLEARANCE                                                          | 24  | 0.418 | 1.354 | 0.0001 | 1 |
| GO_NODE_OF_RANVIER                                                                   | 15  | 0.494 | 1.347 | 0.0001 | 1 |
| GO_CELLULAR_RESPONSE_TO_ALKALOID                                                     | 32  | 0.384 | 1.344 | 0.0001 | 1 |
| GO_AXIS_ELONGATION                                                                   | 27  | 0.439 | 1.34  | 0.0001 | 1 |
| GO_CILIARY_PART                                                                      | 272 | 0.261 | 1.331 | 0.0001 | 1 |
| GO_ION_GATED_CHANNEL_ACTIVITY                                                        | 40  | 0.358 | 1.326 | 0.0001 | 1 |
| GO_DETECTION_OF_BIOTIC_STIMULUS                                                      | 20  | 0.492 | 1.321 | 0.0001 | 1 |
| GO_VITAMIN_METABOLIC_PROCESS                                                         | 104 | 0.294 | 1.321 | 0.0001 | 1 |
| GO_CILIUM                                                                            | 413 | 0.253 | 1.319 | 0.0001 | 1 |
| GO_ORGANIC_ANION_TRANSMEMBRANE_TRANSPORTER_ACTIVITY                                  | 162 | 0.432 | 1.313 | 0.0001 | 1 |
| GO_CELLULAR_DEFENSE_RESPONSE                                                         | 46  | 0.504 | 1.307 | 0.0001 | 1 |
| GO_CARDIAC_SEPTUM_DEVELOPMENT                                                        | 83  | 0.31  | 1.303 | 0.0001 | 1 |
| GO_ACTIN_CYTOSKELETON                                                                | 423 | 0.25  | 1.289 | 0.0001 | 1 |
| GO_ANION_TRANSMEMBRANE_TRANSPORT                                                     | 232 | 0.377 | 1.274 | 0.0001 | 1 |
| GO_HEART_DEVELOPMENT                                                                 | 449 | 0.244 | 1.258 | 0.0001 | 1 |

|                                                   |     |       |       |        |   |
|---------------------------------------------------|-----|-------|-------|--------|---|
| GO_NEGATIVE_REGULATION_OF_CELL_CYCLE<br>_PROCESS  | 200 | 0.225 | 1.227 | 0.0001 | 1 |
| GO_MACROMOLECULE_METHYLATION                      | 180 | 0.252 | 1.2   | 0.0001 | 1 |
| GO_POSITIVE_REGULATION_OF_HOMEOSTATI<br>C_PROCESS | 197 | 0.269 | 1.198 | 0.0001 | 1 |

---

**Table S21-** Gene set enrichment analysis by gene ontology of microarray data obtained Ala92-Dio2 mice and Thr92-Dio2 mice in striatum. Listed gene sets were significant at a nominal p-value <1%.

| Name of the Gene ontology (GO) gene sets enriched in Thr mice (striatum)                         | Size of gene sets | ES    | NES  | NOM p-val | FDR q-val |
|--------------------------------------------------------------------------------------------------|-------------------|-------|------|-----------|-----------|
| GO_LUNG_CELL_DIFFERENTIATION                                                                     | 25                | -0.53 | -1.7 | 1E-04     | 1         |
| GO_NEGATIVE_REGULATION_OF_CIRCADIAN_RHYTHM                                                       | 15                | -0.58 | -1.6 | 1E-04     | 1         |
| GO_UBIQUITIN_LIKE_PROTEIN_CONJUGATING_ENZYME_BINDING                                             | 34                | -0.53 | -1.6 | 1E-04     | 1         |
| GO_OXIDOREDUCTASE_ACTIVITY_ACTING_ON_THE_ALDEHYDE_OR_OXO_GROUP_OF_DONORS_NAD_OR_NADP_AS_ACCEPTOR | 32                | -0.42 | -1.6 | 1E-04     | 1         |
| GO_CHLORIDE_CHANNEL_REGULATOR_ACTIVITY                                                           | 15                | -0.56 | -1.6 | 1E-04     | 1         |
| GO_LIPASE_INHIBITOR_ACTIVITY                                                                     | 15                | -0.65 | -1.5 | 1E-04     | 1         |
| GO_POSITIVE_REGULATION_OF_SUBSTRATE_ADHESION_DEPENDENT_CELL_SPREADING                            | 27                | -0.53 | -1.5 | 1E-04     | 1         |
| GO_HEAT_SHOCK_PROTEIN_BINDING                                                                    | 84                | -0.36 | -1.5 | 1E-04     | 1         |
| GO_RNA_POLYMERASE_II_DISTAL_ENHANCER_SEQUENCE_SPECIFIC_DNA_BINDING                               | 64                | -0.4  | -1.4 | 1E-04     | 1         |
| GO_CIS_TRANS_ISOMERASE_ACTIVITY                                                                  | 39                | -0.41 | -1.4 | 1E-04     | 1         |
| GO_CELLULAR_RESPONSE_TO_INTERLEUKIN_4                                                            | 23                | -0.48 | -1.4 | 1E-04     | 1         |
| GO_CELLULAR_AMINO_ACID_BIOSYNTHETIC_PROCESS                                                      | 88                | -0.3  | -1.4 | 1E-04     | 1         |
| GO_ALPHA_AMINO_ACID_BIOSYNTHETIC_PROCESS                                                         | 73                | -0.29 | -1.4 | 1E-04     | 1         |
| GO_REGULATION_OF_DNA_TEMPLATED_TRANSCRIPTION_IN_RESPONSE_TO_STRESS                               | 64                | -0.31 | -1.4 | 1E-04     | 1         |

|                                                     |     |       |      |       |   |
|-----------------------------------------------------|-----|-------|------|-------|---|
| GO_CORE_PROMOTER_BINDING                            | 146 | -0.28 | -1.4 | 1E-04 | 1 |
| GO_REGULATION_OF_PEPTIDYL_SERINE_PHOSPHORYLATION    | 101 | -0.28 | -1.3 | 1E-04 | 1 |
| GO_POSITIVE_REGULATION_OF_RECEPTOR_IN_TERNALIZATION | 23  | -0.39 | -1.3 | 1E-04 | 1 |

---

**Table S22** - Custom gene set enrichment analysis of positively regulated T3 responsive genes obtained from the microarray performed in the Striatum of Ala92-Dio2 vs Thr92-Dio2 mice.

| <b>Gene Symbol</b> | <b>Gene title</b>                                                            |
|--------------------|------------------------------------------------------------------------------|
| <i>Htr2c</i>       | 5-hydroxytryptamine (serotonin) receptor 2C                                  |
| <i>Hr</i>          | hairless homolog (mouse)                                                     |
| <i>Ngf</i>         | nerve growth factor                                                          |
| <i>Flywch2</i>     | FLYWCH family member 2                                                       |
| <i>Gli1</i>        | glioma-associated oncogene homolog 1 (zinc finger protein)                   |
| <i>Sema7a</i>      | semaphorin 7A, GPI membrane anchor (John Milton Hagen blood group)           |
| <i>Cntn2</i>       | contactin 2 (axonal)                                                         |
| <i>Nefm</i>        | neurofilament, medium polypeptide                                            |
| <i>Itga7</i>       | integrin, alpha 7                                                            |
| <i>Luzp1</i>       | leucine zipper protein 1                                                     |
| <i>Rpe65</i>       | retinal pigment epithelium-specific protein 65kDa                            |
| <i>Stard4</i>      | START domain containing 4, sterol regulated                                  |
| <i>Kcnj10</i>      | potassium inwardly-rectifying channel, subfamily J, member 10                |
| <i>Pdp1</i>        | pyruvate dehydrogenase phosphatase catalytic subunit 1                       |
| <i>Nefh</i>        | neurofilament, heavy polypeptide 200kDa                                      |
| <i>Itih3</i>       | inter-alpha (globulin) inhibitor H3                                          |
| <i>Ier5</i>        | immediate early response 5                                                   |
| <i>Mycn</i>        | v-myc myelocytomatosis viral related oncogene, neuroblastoma derived (avian) |
| <i>Pvalb</i>       | parvalbumin                                                                  |

**Table S23** - Custom gene set enrichment analysis of negatively regulated T3 responsive genes obtained from the microarray performed in the Striatum of Ala92-Dio2 vs Thr92-Dio2 mice.

| <b>Gene Symbol</b> | <b>Gene title</b>                                                             |
|--------------------|-------------------------------------------------------------------------------|
| <i>Col6a1</i>      | collagen, type VI, alpha 1                                                    |
| <i>Cxadr</i>       | coxsackie virus and adenovirus receptor                                       |
| <i>Cirbp</i>       | cold inducible RNA binding protein                                            |
| <i>Agbl3</i>       | ATP/GTP binding protein-like 3                                                |
| <i>Col6a2</i>      | collagen, type VI, alpha 2                                                    |
| <i>Slc1a3</i>      | solute carrier family 1 (glial high affinity glutamate transporter), member 3 |
| <i>Odf4</i>        | outer dense fiber of sperm tails 4                                            |
| <i>Syce2</i>       | synaptonemal complex central element protein 2                                |
| <i>Hmgcs2</i>      | 3-hydroxy-3-methylglutaryl-Coenzyme A synthase 2 (mitochondrial)              |
| <i>Pcsk4</i>       | proprotein convertase subtilisin/kexin type 4                                 |
| <i>Marcks1</i>     | MARCKS-like 1                                                                 |
| <i>Mamdc2</i>      | MAM domain containing 2                                                       |
| <i>Dgkg</i>        | diacylglycerol kinase, gamma 90kDa                                            |
| <i>Hapln1</i>      | hyaluronan and proteoglycan link protein 1                                    |

**Table S24** - T3-responsive gene expression from striatum in Thr92-Dio2 and Ala92-Dio2 mice.

| <b>Genes</b> | <b>Thr92-Dio2 vs Ala92-Dio2 relative mRNA levels</b> |
|--------------|------------------------------------------------------|
| <i>Ier5</i>  | 0.69±0.05***                                         |
| <i>Odf4</i>  | 1.22±0.07*                                           |

Results are relative to *CycloB* mRNA levels and normalized to Thr92-Dio2 baseline animals; Values are the mean ± SEM of 9-10 independent samples; gene abbreviations are as indicated in the Table S27; \*p≤ 0.05 and \*\*\*p≤ 0.001 vs. Thr92-Dio2 baseline animals.

**Table S25** - ER stress-related gene expression from the brain areas in Thr92-Dio2 and Ala92-Dio2 mice treated with 4-PBA.

| <b>Genes</b>   | <b>Cortex</b> | <b>Amygdala</b> |
|----------------|---------------|-----------------|
| <i>Bip</i>     | 0.94±0.02     | 1.05±0.08       |
| <i>Chop</i>    | 1.08±0.03     | 1.02±0.06       |
| <i>sXbp1</i>   | 0.97±0.06     | 0.96±0.22       |
| <i>Ergic53</i> | 0.89±0.08     | 0.89±0.08       |
| <i>Pdi</i>     | 0.88±0.05     | 1.01±0.08       |

Results are relative to *CycloB* mRNA levels and normalized to Thr92-Dio2 animals; Values are the mean ± SEM of 5-6 independent samples; gene abbreviations are as indicated in the Table S27.



**Table S26** - Metabolic parameters in Thr92-Dio2 and Ala92-Dio2 mice.

| Parameter   | Reference | Hypothyroid+LT4 |            |
|-------------|-----------|-----------------|------------|
|             |           | Thr92-Dio2      | Ala92-Dio2 |
| Distance    | Fold      | 1.0±0.09        | 0.87±0.08  |
| Sleep Time  | %         | 36±8.3          | 53±5.8     |
| VO2 - dark  | Fold      | 1.0±0.08        | 0.89±0.02  |
| VO2 - light | Fold      | 0.91±0.08       | 0.80±0.02  |

Except for sleep time, results are fold change in Ala92-Dio2 relative to Thr92-Dio2 animals for each specific group; for distance travelled 1.0 = 1332 and 1367 ft/48h respectively for Hypothyroid+LT4; for VO2 1.0 = 101 and 132 L/Kg•24h respectively for Hypothyroid+LT4; all groups were repeated twice with similar results; entries are the mean±SEM of 5-6 animals.

**Table S27 – Oligonucleotide Primers**

| Mouse Gene                                             |                        | Sequence                   |
|--------------------------------------------------------|------------------------|----------------------------|
| Heat Shock Protein Family A (Hsp70) Member 5           | <i>Bip</i> Forward     | ACTTGGGGACCACCTATTCT       |
|                                                        | <i>Bip</i> Reverse     | ATCGCCAATCAGACGCTCC        |
| DNA-damage inducible transcript 3                      | <i>Chop</i> Forward    | CTGGAAGCCTGGTATGAGGAT      |
|                                                        | <i>Chop</i> Reverse    | CAGGGTCAAGAGTAGTGAAGGT     |
| Spliced X-box binding protein 1                        | <i>sXbp1</i> Forward   | TTACGAGAGAAAACACTCATGGGC   |
|                                                        | <i>sXbp1</i> Reverse   | GGGTCCAACCTGTCCAGAATGC     |
| Endoplasmic reticulum-golgi intermediate compartment 1 | <i>Ergic53</i> Forward | TGCTGTCTTTCAGCCAATTCA      |
|                                                        | <i>Ergic53</i> Reverse | AGCTGTATTTGTACTCGAAACGG    |
| Protein disulfide isomerase                            | <i>Pdi</i> Forward     | GCCGCAAACTGAAGGCAG         |
|                                                        | <i>Pdi</i> Reverse     | GGTAGCCACGGACACCATAC       |
| Immediate early response 5                             | <i>Ier5</i> Forward    | TCACCGCATCGTCAGCATC        |
|                                                        | <i>Ier5</i> Reverse    | GGTCACTCAGGTAGACTTGGC      |
| Outer dense fiber of sperm tails 4                     | <i>Odf4</i> Forward    | ATGGAACCTGACTTGAATGAGGA    |
|                                                        | <i>Odf4</i> Reverse    | CATTGAAAGGGCAATAGGGAGTT    |
| Human Gene                                             |                        | Sequence                   |
| Heat Shock Protein Family A (Hsp70) Member 5           | <i>BIP</i> Forward     | TGTTCAACCAATTATCAGCAAACCTC |
|                                                        | <i>BIP</i> Reverse     | TTCTGCTGTATCCTCTTACCAGT    |
| DNA-damage inducible transcript 3                      | <i>CHOP</i> Forward    | AGAACCAGGAAACGGAAACAGA     |
|                                                        | <i>CHOP</i> Reverse    | TCTCCTTCATGCGCTGCTTT       |
| Spliced X-box binding protein 1                        | <i>sXBP1</i> Forward   | CTGAGTCCGAATCAGGTGCAG      |
|                                                        | <i>sXBP1</i> Reverse   | ATCCATGGGGAGATGTTCTGG      |
| Total X-box binding protein 1                          | <i>tXBP1</i> Forward   | TGGCCGGGTCTGCTGAGTCCG      |
|                                                        | <i>tXBP1</i> Reverse   | ATCCATGGGGAGATGTTCTGG      |
| Activating transcription factor 4                      | <i>ATF4</i> Forward    | GTTCTCCAGCGACAAGGCTA       |
|                                                        | <i>ATF4</i> Reverse    | ATCCTGCTTGCTGTTGTTGG       |
